# Supplementary material for: Catalytic dehydrogenative decarboxyolefination of carboxylic acids
Source: Springer Nature journal article supplement (doi:10.1038/s41557-018-0142-4), 2018-09-27
Supplement: 41557_2018_142_MOESM3_ESM.cif [file 41557_2018_142_MOESM3_ESM.cif]

data_11448sadabs_sq

_publ_requested_journal          'Nature'

_publ_section_title              
;
 Catalytic  Dehydrogenative Decarboxyolefination of Carboxylic Acids
;

loop_
_publ_author_name
_publ_author_address

      'Xiang Sun'
;     Max-Planck-Institut f\"ur Kohlenforschung
      Kaiser-Wilhelm-Platz 1
      45470 M\"ulheim an der Ruhr
      Germany
;
      'Junting Chen'
;     Max-Planck-Institut f\"ur Kohlenforschung
      Kaiser-Wilhelm-Platz 1
      45470 M\"ulheim an der Ruhr
      Germany
;
      'Tobias Ritter'
;     Max-Planck-Institut f\"ur Kohlenforschung
      Kaiser-Wilhelm-Platz 1
      45470 M\"ulheim an der Ruhr
      Germany
;

_audit_block_code                SUX-SA-206-01
_audit_creation_date             2018-03-19
_audit_creation_method           
;
Olex2 1.2
(compiled 2017.08.10 svn.r3458 for OlexSys, GUI svn.r5381)
;

_publ_contact_author_address     ?
_publ_contact_author_email       ?
_publ_contact_author_id_orcid    ?
_publ_contact_author_phone       ?
_publ_section_references         
;
Dolomanov, O.V., Bourhis, L.J., Gildea, R.J, Howard, J.A.K. & Puschmann, H.
 (2009), J. Appl. Cryst. 42, 339-341.

Sheldrick, G.M. (2015). Acta Cryst. C71, 3-8.
;
_chemical_name_common            ?
_chemical_name_systematic        
;
 Title
;
_chemical_formula_moiety         'C14 H21 Cl Co N5 O5'
_chemical_formula_sum            'C14 H21 Cl Co N5 O5'
_chemical_formula_weight         433.74
_chemical_properties_physical      'none'
_chemical_melting_point          ?

loop_
_atom_type_symbol
_atom_type_description
_atom_type_scat_dispersion_real
_atom_type_scat_dispersion_imag
_atom_type_scat_source
C C 0.0033 0.0016 'International Tables Vol C Tables 4.2.6.8 and 6.1.1.4'
H H 0.0000 0.0000 'International Tables Vol C Tables 4.2.6.8 and 6.1.1.4'
N N 0.0061 0.0033 'International Tables Vol C Tables 4.2.6.8 and 6.1.1.4'
O O 0.0106 0.0060 'International Tables Vol C Tables 4.2.6.8 and 6.1.1.4'
Cl Cl 0.1484 0.1585 'International Tables Vol C Tables 4.2.6.8 and 6.1.1.4'
Co Co 0.3494 0.9721 'International Tables Vol C Tables 4.2.6.8 and 6.1.1.4'

_shelx_space_group_comment       
;
The symmetry employed for this shelxl refinement is uniquely defined
by the following loop, which should always be used as a source of
symmetry information in preference to the above space-group names.
They are only intended as comments.
;
_space_group_crystal_system      monoclinic
_space_group_IT_number           14
_space_group_name_H-M_alt        'P 1 21/n 1'
_space_group_name_Hall           '-P 2yn'

_symmetry_cell_setting           MONOCLINIC
_symmetry_space_group_name_H-M   'P21/n'
_symmetry_space_group_name_Hall  '-P 2yn'
_symmetry_Int_Tables_number      14
loop_
_space_group_symop_operation_xyz
'x, y, z'
'-x+1/2, y+1/2, -z+1/2'
'-x, -y, -z'
'x-1/2, -y-1/2, z-1/2'

_cell_length_a                   7.9090(10)
_cell_length_b                   22.106(3)
_cell_length_c                   12.2017(16)
_cell_angle_alpha                90
_cell_angle_beta                 95.783(2)
_cell_angle_gamma                90
_cell_volume                     2122.4(5)
_cell_formula_units_Z            4
_cell_measurement_reflns_used    9946


_cell_measurement_temperature    100(2)
_cell_measurement_theta_max      30.8719
_cell_measurement_theta_min      2.4921
_shelx_estimated_absorpt_T_max   0.979
_shelx_estimated_absorpt_T_min   0.904
_exptl_absorpt_coefficient_mu    0.965
_exptl_absorpt_correction_T_max  0.98100
_exptl_absorpt_correction_T_min  0.92083
_exptl_crystal_recrystallization_method 
'Re-crystallisation from solvent:  dichloromethane'

loop_
_exptl_crystal_face_index_h
_exptl_crystal_face_index_k
_exptl_crystal_face_index_l
_exptl_crystal_face_perp_dist
0.00 1.00 0.00 0.0100
0.00 -1.00 0.00 0.0100
1.00 0.00 -1.00 0.0500
-1.00 0.00 1.00 0.0500
1.00 0.00 2.00 0.0250
-1.00 0.00 -2.00 0.0250

_exptl_absorpt_correction_type   gaussian
_exptl_absorpt_process_details   'SADABS (Bruker AXS, 2012)'
_exptl_absorpt_special_details   ?
_exptl_crystal_colour            orange
_exptl_crystal_density_diffrn    1.357
_exptl_crystal_density_meas      ?
_exptl_crystal_density_method    ?

_exptl_crystal_description       plate
_exptl_crystal_F_000             896
_exptl_crystal_size_max          0.107
_exptl_crystal_size_mid          0.051
_exptl_crystal_size_min          0.022
_exptl_transmission_factor_max   ?
_exptl_transmission_factor_min   ?
_diffrn_reflns_av_R_equivalents  0.0780
_diffrn_reflns_av_unetI/netI     0.0431
_diffrn_reflns_Laue_measured_fraction_full 0.999
_diffrn_reflns_Laue_measured_fraction_max 0.986
_diffrn_reflns_limit_h_max       11
_diffrn_reflns_limit_h_min       -11
_diffrn_reflns_limit_k_max       32
_diffrn_reflns_limit_k_min       -31
_diffrn_reflns_limit_l_max       17
_diffrn_reflns_limit_l_min       -17
_diffrn_reflns_number            61298
_diffrn_reflns_point_group_measured_fraction_full 0.999
_diffrn_reflns_point_group_measured_fraction_max 0.986
_diffrn_reflns_theta_full        25.242
_diffrn_reflns_theta_max         31.172
_diffrn_reflns_theta_min         2.748
_diffrn_radiation_source         1\mS
_diffrn_radiation_monochromator  'Incoatec Helios mirrors'
_diffrn_ambient_temperature      100(2)
_diffrn_detector_area_resol_mean 66.67
_diffrn_measured_fraction_theta_full 0.999
_diffrn_measured_fraction_theta_max 0.986
_diffrn_measurement_device_type  'Bruker-AXS Kappa Mach3 APEX-II'
_diffrn_measurement_method       'CCD \f- and \w-scans'
_diffrn_radiation_type           Mo-K\a
_diffrn_radiation_wavelength     0.71073
_diffrn_source                   ?
_diffrn_standards_number         0
_reflns_Friedel_coverage         0.000
_reflns_Friedel_fraction_full    .
_reflns_Friedel_fraction_max     .
_reflns_number_gt                5077
_reflns_number_total             6779
_reflns_special_details          
;
 Reflections were merged by SHELXL according to the crystal
 class for the calculation of statistics and refinement.
 
 Structure factors included contributions from the .fab file.
 
 _reflns_Friedel_fraction is defined as the number of unique
 Friedel pairs measured divided by the number that would be
 possible theoretically, ignoring centric projections and
 systematic absences.
;
_reflns_threshold_expression     'I > 2\s(I)'
_computing_cell_refinement       'SAINT software (Bruker AXS, 2004)'

_computing_data_collection       'APEX2 (Bruker AXS, 2005-2013)'
_computing_data_reduction        'SAINT software (Bruker AXS, 2004)'
_computing_molecular_graphics    'DIAMOND (Crystal Impact GbR, 1997-2014)'
_computing_publication_material  'Olex2 (Dolomanov et al., 2009)'
_computing_structure_refinement  'SHELXL (G. M. Sheldrick, 2013)'
_computing_structure_solution    'SHELXS (G. M. Sheldrick, 2013)'
_refine_diff_density_max         0.702
_refine_diff_density_min         -0.742
_refine_diff_density_rms         0.104
_refine_ls_extinction_coef       .
_refine_ls_extinction_method     none
_refine_ls_goodness_of_fit_ref   1.042
_refine_ls_hydrogen_treatment    mixed
_refine_ls_matrix_type           full
_refine_ls_number_parameters     248
_refine_ls_number_reflns         6779
_refine_ls_number_restraints     0
_refine_ls_R_factor_all          0.0663
_refine_ls_R_factor_gt           0.0427
_refine_ls_restrained_S_all      1.042
_refine_ls_shift/su_max          0.002
_refine_ls_shift/su_mean         0.000
_refine_ls_structure_factor_coef Fsqd
_refine_ls_weighting_details     
'w=1/[\s^2^(Fo^2^)+(0.0610P)^2^+1.3152P] where P=(Fo^2^+2Fc^2^)/3'
_refine_ls_weighting_scheme      calc
_refine_ls_wR_factor_gt          0.1078
_refine_ls_wR_factor_ref         0.1180

_refine_special_details          
;
 Refinement of F^2^ against ALL reflections.  The weighted R-factor wR and
 goodness of fit S are based on F^2^, conventional R-factors R are based
 on F, with F set to zero for negative F^2^. The threshold expression of
 F^2^ > 2sigma(F^2^) is used only for calculating R-factors(gt) etc. and is
 not relevant to the choice of reflections for refinement.  R-factors based
 on F^2^ are statistically about twice as large as those based on F, and R-
 factors based on ALL data will be even larger.

 The minimum and maximum estimated transmissions from the multi-scan
 scaling are 0.8985 and 1.0000 (SADABS).

Highest peak        ?
Deepest hole        ?
;

_olex2_refinement_description    
;
1. Fixed Uiso
 At 1.2 times of:
  All C(H) groups
 At 1.5 times of:
  All C(H,H,H) groups
2.a Aromatic/amide H refined with riding coordinates:
 C1(H1), C2(H2A), C4(H4), C5(H5)
2.b Idealised Me refined as rotating group:
 C6(H6A,H6B,H6C), C9(H9A,H9B,H9C), C10(H10A,H10B,H10C), C13(H13A,H13B,H13C),
 C14(H14A,H14B,H14C)
;

_vrf_PLAT355_11448sadabs_sq
;
PROBLEM: Test for long O-H (Angstrom Difference) XRAY: 0.82 NEUT 0.983
RESPONSE: O3-H3 bond length is elongated due to H-bonding interaction to O4
;

_atom_sites_solution_hydrogens   geom
_atom_sites_solution_primary     dual
_atom_sites_solution_secondary   difmap

loop_
_atom_site_label
_atom_site_type_symbol
_atom_site_fract_x
_atom_site_fract_y
_atom_site_fract_z
_atom_site_U_iso_or_equiv
_atom_site_adp_type
_atom_site_occupancy
_atom_site_site_symmetry_order
_atom_site_calc_flag
_atom_site_refinement_flags_posn
_atom_site_refinement_flags_adp
_atom_site_refinement_flags_occupancy
_atom_site_disorder_assembly
_atom_site_disorder_group
Co1 Co 0.44160(3) 0.66582(2) 0.51000(2) 0.01115(8) Uani 1 1 d . . . . .
Cl1 Cl 0.58477(6) 0.70222(2) 0.66288(4) 0.01630(11) Uani 1 1 d . . . . .
O1 O 0.1089(3) 0.55157(8) 0.08989(14) 0.0286(4) Uani 1 1 d . . . . .
O2 O 0.2753(2) 0.77979(7) 0.47642(14) 0.0191(3) Uani 1 1 d . . . . .
H2 H 0.407(7) 0.779(2) 0.429(4) 0.108(18) Uiso 1 1 d . . . . .
O3 O 0.3415(2) 0.56535(7) 0.63569(13) 0.0209(3) Uani 1 1 d . . . . .
H3 H 0.463(6) 0.554(2) 0.608(4) 0.091(15) Uiso 1 1 d . . . . .
O4 O 0.61571(19) 0.55561(7) 0.55442(13) 0.0174(3) Uani 1 1 d . . . . .
O5 O 0.5453(2) 0.76827(7) 0.39259(13) 0.0186(3) Uani 1 1 d . . . . .
N1 N 0.3229(2) 0.63140(8) 0.37581(14) 0.0121(3) Uani 1 1 d . . . . .
N2 N 0.2691(2) 0.72460(8) 0.52160(15) 0.0143(3) Uani 1 1 d . . . . .
N3 N 0.3017(2) 0.62159(8) 0.59880(14) 0.0139(3) Uani 1 1 d . . . . .
N4 N 0.6158(2) 0.60825(8) 0.50212(14) 0.0132(3) Uani 1 1 d . . . . .
N5 N 0.5811(2) 0.71084(8) 0.42315(14) 0.0133(3) Uani 1 1 d . . . . .
C1 C 0.3076(3) 0.57074(9) 0.36409(17) 0.0148(4) Uani 1 1 d . . . . .
H1 H 0.347270 0.545620 0.424434 0.018 Uiso 1 1 calc R . . . .
C2 C 0.2375(3) 0.54406(10) 0.26927(18) 0.0167(4) Uani 1 1 d . . . . .
H2A H 0.230065 0.501251 0.264001 0.020 Uiso 1 1 calc R . . . .
C3 C 0.1771(3) 0.58025(10) 0.18025(18) 0.0179(4) Uani 1 1 d . . . . .
C4 C 0.1897(3) 0.64289(10) 0.19198(18) 0.0172(4) Uani 1 1 d . . . . .
H4 H 0.148203 0.669023 0.133547 0.021 Uiso 1 1 calc R . . . .
C5 C 0.2635(3) 0.66604(9) 0.29019(17) 0.0145(4) Uani 1 1 d . . . . .
H5 H 0.272900 0.708720 0.297658 0.017 Uiso 1 1 calc R . . . .
C6 C 0.0465(5) 0.58789(14) -0.0029(2) 0.0541(11) Uani 1 1 d . . . . .
H6A H 0.140433 0.611134 -0.028520 0.081 Uiso 1 1 calc GR . . . .
H6B H -0.040644 0.615728 0.018784 0.081 Uiso 1 1 calc GR . . . .
H6C H -0.002984 0.561628 -0.062457 0.081 Uiso 1 1 calc GR . . . .
C7 C 0.1669(3) 0.64884(10) 0.62618(17) 0.0154(4) Uani 1 1 d . . . . .
C8 C 0.1483(3) 0.71012(10) 0.58062(17) 0.0151(4) Uani 1 1 d . . . . .
C9 C 0.0467(3) 0.62198(11) 0.69890(19) 0.0226(5) Uani 1 1 d . . . . .
H9A H 0.075021 0.579260 0.712065 0.034 Uiso 1 1 calc GR . . . .
H9B H -0.069626 0.625285 0.663276 0.034 Uiso 1 1 calc GR . . . .
H9C H 0.055612 0.643693 0.769266 0.034 Uiso 1 1 calc GR . . . .
C10 C 0.0092(3) 0.75226(11) 0.6040(2) 0.0209(4) Uani 1 1 d . . . . .
H10A H -0.100577 0.735115 0.575039 0.031 Uiso 1 1 calc GR . . . .
H10B H 0.025563 0.791315 0.568509 0.031 Uiso 1 1 calc GR . . . .
H10C H 0.011193 0.758073 0.683713 0.031 Uiso 1 1 calc GR . . . .
C11 C 0.7339(2) 0.62226(10) 0.43944(17) 0.0145(4) Uani 1 1 d . . . . .
C12 C 0.7143(3) 0.68346(10) 0.39442(17) 0.0150(4) Uani 1 1 d . . . . .
C13 C 0.8733(3) 0.58007(11) 0.4178(2) 0.0227(5) Uani 1 1 d . . . . .
H13A H 0.964852 0.582819 0.478036 0.034 Uiso 1 1 calc GR . . . .
H13B H 0.917352 0.591005 0.348270 0.034 Uiso 1 1 calc GR . . . .
H13C H 0.829455 0.538583 0.413021 0.034 Uiso 1 1 calc GR . . . .
C14 C 0.8382(3) 0.71198(11) 0.32619(18) 0.0203(4) Uani 1 1 d . . . . .
H14A H 0.835420 0.690856 0.255415 0.030 Uiso 1 1 calc GR . . . .
H14B H 0.952728 0.709289 0.364880 0.030 Uiso 1 1 calc GR . . . .
H14C H 0.808099 0.754574 0.313343 0.030 Uiso 1 1 calc GR . . . .

loop_
_atom_site_aniso_label
_atom_site_aniso_U_11
_atom_site_aniso_U_22
_atom_site_aniso_U_33
_atom_site_aniso_U_23
_atom_site_aniso_U_13
_atom_site_aniso_U_12
Co1 0.01015(13) 0.01065(13) 0.01345(13) -0.00032(10) 0.00515(9) -0.00044(10)
Cl1 0.0142(2) 0.0180(2) 0.0173(2) -0.00458(18) 0.00461(17) -0.00304(18)
O1 0.0480(11) 0.0169(8) 0.0182(8) -0.0012(6) -0.0103(8) -0.0028(8)
O2 0.0207(8) 0.0122(7) 0.0255(8) 0.0021(6) 0.0077(6) 0.0029(6)
O3 0.0264(8) 0.0147(7) 0.0227(8) 0.0058(6) 0.0076(7) 0.0013(6)
O4 0.0177(7) 0.0129(7) 0.0217(7) 0.0042(6) 0.0026(6) 0.0029(6)
O5 0.0210(8) 0.0116(7) 0.0244(8) 0.0031(6) 0.0080(6) -0.0005(6)
N1 0.0105(7) 0.0122(8) 0.0143(8) 0.0008(6) 0.0039(6) 0.0005(6)
N2 0.0139(8) 0.0120(8) 0.0174(8) -0.0012(6) 0.0035(6) 0.0005(6)
N3 0.0155(8) 0.0129(8) 0.0140(8) 0.0002(6) 0.0051(6) -0.0021(6)
N4 0.0128(7) 0.0113(8) 0.0157(8) 0.0004(6) 0.0023(6) 0.0013(6)
N5 0.0123(7) 0.0120(8) 0.0161(8) 0.0001(6) 0.0038(6) -0.0023(6)
C1 0.0145(9) 0.0129(9) 0.0175(9) 0.0016(7) 0.0036(7) 0.0013(7)
C2 0.0187(10) 0.0125(9) 0.0190(10) -0.0006(8) 0.0028(8) 0.0004(8)
C3 0.0212(10) 0.0170(10) 0.0155(9) -0.0012(8) 0.0014(8) -0.0013(8)
C4 0.0205(10) 0.0143(10) 0.0165(9) 0.0031(8) 0.0003(8) 0.0005(8)
C5 0.0135(9) 0.0115(9) 0.0188(9) 0.0024(8) 0.0036(7) 0.0005(7)
C6 0.105(3) 0.0235(14) 0.0260(14) 0.0044(11) -0.0308(17) -0.0100(16)
C7 0.0137(9) 0.0190(10) 0.0141(9) -0.0039(8) 0.0048(7) -0.0028(8)
C8 0.0115(9) 0.0183(10) 0.0162(9) -0.0048(8) 0.0044(7) -0.0001(7)
C9 0.0212(11) 0.0284(12) 0.0202(10) -0.0024(9) 0.0116(9) -0.0064(9)
C10 0.0133(9) 0.0264(11) 0.0237(11) -0.0055(9) 0.0057(8) 0.0042(8)
C11 0.0097(8) 0.0183(10) 0.0157(9) -0.0020(8) 0.0020(7) 0.0009(7)
C12 0.0118(9) 0.0184(10) 0.0150(9) -0.0007(8) 0.0022(7) -0.0022(7)
C13 0.0163(10) 0.0265(12) 0.0260(11) -0.0050(9) 0.0057(9) 0.0064(9)
C14 0.0133(9) 0.0299(12) 0.0187(10) 0.0024(9) 0.0065(8) -0.0024(8)

_geom_special_details            
;
 All esds (except the esd in the dihedral angle between two l.s. planes)
 are estimated using the full covariance matrix.  The cell esds are taken
 into account individually in the estimation of esds in distances, angles
 and torsion angles; correlations between esds in cell parameters are only
 used when they are defined by crystal symmetry.  An approximate (isotropic)
 treatment of cell esds is used for estimating esds involving l.s. planes.
;
loop_
_geom_bond_atom_site_label_1
_geom_bond_atom_site_label_2
_geom_bond_distance
_geom_bond_site_symmetry_2
_geom_bond_publ_flag
Co1 Cl1 2.2324(6) . ?
Co1 N1 1.9574(17) . ?
Co1 N2 1.8999(17) . ?
Co1 N3 1.8960(17) . ?
Co1 N4 1.8852(17) . ?
Co1 N5 1.8886(17) . ?
O1 C3 1.337(3) . ?
O1 C6 1.435(3) . ?
O2 N2 1.342(2) . ?
O3 N3 1.349(2) . ?
O4 N4 1.327(2) . ?
O5 N5 1.345(2) . ?
N1 C1 1.353(3) . ?
N1 C5 1.341(3) . ?
N2 C8 1.293(3) . ?
N3 C7 1.298(3) . ?
N4 C11 1.302(3) . ?
N5 C12 1.294(3) . ?
C1 C2 1.365(3) . ?
C2 C3 1.394(3) . ?
C3 C4 1.395(3) . ?
C4 C5 1.378(3) . ?
C7 C8 1.466(3) . ?
C7 C9 1.487(3) . ?
C8 C10 1.491(3) . ?
C11 C12 1.462(3) . ?
C11 C13 1.488(3) . ?
C12 C14 1.488(3) . ?

loop_
_geom_angle_atom_site_label_1
_geom_angle_atom_site_label_2
_geom_angle_atom_site_label_3
_geom_angle
_geom_angle_site_symmetry_1
_geom_angle_site_symmetry_3
_geom_angle_publ_flag
N1 Co1 Cl1 177.73(5) . . ?
N2 Co1 Cl1 89.93(6) . . ?
N2 Co1 N1 92.33(7) . . ?
N3 Co1 Cl1 89.10(6) . . ?
N3 Co1 N1 91.11(7) . . ?
N3 Co1 N2 81.10(8) . . ?
N4 Co1 Cl1 88.52(6) . . ?
N4 Co1 N1 89.22(7) . . ?
N4 Co1 N2 178.45(8) . . ?
N4 Co1 N3 98.78(8) . . ?
N4 Co1 N5 81.71(8) . . ?
N5 Co1 Cl1 90.18(6) . . ?
N5 Co1 N1 89.63(7) . . ?
N5 Co1 N2 98.39(8) . . ?
N5 Co1 N3 179.12(8) . . ?
C3 O1 C6 117.61(19) . . ?
C1 N1 Co1 120.27(14) . . ?
C5 N1 Co1 122.03(14) . . ?
C5 N1 C1 117.58(18) . . ?
O2 N2 Co1 122.32(13) . . ?
C8 N2 Co1 116.66(15) . . ?
C8 N2 O2 120.91(18) . . ?
O3 N3 Co1 122.44(13) . . ?
C7 N3 Co1 116.74(15) . . ?
C7 N3 O3 120.78(17) . . ?
O4 N4 Co1 122.11(13) . . ?
C11 N4 Co1 116.12(14) . . ?
C11 N4 O4 121.74(17) . . ?
O5 N5 Co1 122.29(13) . . ?
C12 N5 Co1 116.31(15) . . ?
C12 N5 O5 121.41(17) . . ?
N1 C1 C2 122.8(2) . . ?
C1 C2 C3 119.4(2) . . ?
O1 C3 C2 116.6(2) . . ?
O1 C3 C4 125.0(2) . . ?
C2 C3 C4 118.3(2) . . ?
C5 C4 C3 118.53(19) . . ?
N1 C5 C4 123.35(19) . . ?
N3 C7 C8 112.63(18) . . ?
N3 C7 C9 124.0(2) . . ?
C8 C7 C9 123.32(19) . . ?
N2 C8 C7 112.84(18) . . ?
N2 C8 C10 123.5(2) . . ?
C7 C8 C10 123.56(18) . . ?
N4 C11 C12 112.69(18) . . ?
N4 C11 C13 122.9(2) . . ?
C12 C11 C13 124.44(19) . . ?
N5 C12 C11 112.90(18) . . ?
N5 C12 C14 123.6(2) . . ?
C11 C12 C14 123.46(19) . . ?

_shelx_res_file                  
;
TITL 11448sadabs_a.res in P2(1)/n
    11448sadabs_sq.res
    created by SHELXL-2016/6 at 11:38:08 on 19-Mar-2018
REM Old TITL 11448sadabs in P2(1)/n
REM SHELXT solution in P2(1)/n
REM R1 0.114, Rweak 0.006, Alpha 0.034, Orientation as input
REM Formula found by SHELXT: C17 N5 O4 Cl Co
CELL 0.71073 7.909 22.1059 12.2017 90 95.783 90
ZERR 4 0.001 0.0029 0.0016 0 0.002 0
LATT 1
SYMM 0.5-X,0.5+Y,0.5-Z
SFAC C H N O Cl Co
UNIT 56 84 20 20 4 4

L.S. 10 0 59
PLAN  20
SIZE 0.022 0.051 0.107
TEMP -173
list 4
ABIN
fmap 2
acta
OMIT 0 2 0
OMIT 0 1 1
OMIT 1 4 0
REM <olex2.extras>
REM <HklSrc "%.\\11448sadabs_sq.hkl">
REM </olex2.extras>

WGHT    0.061000    1.315200
FVAR       0.37264
CO1   6    0.441598    0.665816    0.510001    11.00000    0.01015    0.01065 =
         0.01345   -0.00032    0.00515   -0.00044
CL1   5    0.584772    0.702216    0.662876    11.00000    0.01421    0.01803 =
         0.01726   -0.00458    0.00461   -0.00304
O1    4    0.108886    0.551566    0.089888    11.00000    0.04798    0.01693 =
         0.01821   -0.00122   -0.01031   -0.00281
O2    4    0.275343    0.779785    0.476424    11.00000    0.02067    0.01219 =
         0.02552    0.00208    0.00766    0.00293
H2    2    0.406815    0.779070    0.429336    11.00000    0.10812
O3    4    0.341467    0.565346    0.635695    11.00000    0.02637    0.01465 =
         0.02267    0.00581    0.00762    0.00131
H3    2    0.463102    0.553580    0.607946    11.00000    0.09134
O4    4    0.615711    0.555608    0.554419    11.00000    0.01774    0.01295 =
         0.02172    0.00420    0.00256    0.00285
O5    4    0.545260    0.768266    0.392594    11.00000    0.02097    0.01156 =
         0.02437    0.00315    0.00805   -0.00055
N1    3    0.322906    0.631399    0.375808    11.00000    0.01051    0.01215 =
         0.01426    0.00076    0.00391    0.00050
N2    3    0.269070    0.724600    0.521603    11.00000    0.01389    0.01198 =
         0.01739   -0.00117    0.00354    0.00051
N3    3    0.301739    0.621593    0.598797    11.00000    0.01546    0.01293 =
         0.01401    0.00023    0.00509   -0.00213
N4    3    0.615816    0.608249    0.502120    11.00000    0.01277    0.01132 =
         0.01566    0.00043    0.00230    0.00134
N5    3    0.581101    0.710842    0.423145    11.00000    0.01228    0.01196 =
         0.01612    0.00014    0.00383   -0.00235
C1    1    0.307586    0.570741    0.364088    11.00000    0.01448    0.01291 =
         0.01750    0.00165    0.00363    0.00127
AFIX  43
H1    2    0.347270    0.545620    0.424434    11.00000   -1.20000
AFIX   0
C2    1    0.237546    0.544062    0.269266    11.00000    0.01874    0.01254 =
         0.01903   -0.00055    0.00284    0.00038
AFIX  43
H2A   2    0.230065    0.501251    0.264001    11.00000   -1.20000
AFIX   0
C3    1    0.177113    0.580249    0.180246    11.00000    0.02121    0.01700 =
         0.01553   -0.00118    0.00136   -0.00127
C4    1    0.189669    0.642893    0.191983    11.00000    0.02049    0.01428 =
         0.01650    0.00313    0.00033    0.00052
AFIX  43
H4    2    0.148203    0.669023    0.133547    11.00000   -1.20000
AFIX   0
C5    1    0.263533    0.666042    0.290190    11.00000    0.01354    0.01146 =
         0.01878    0.00243    0.00361    0.00050
AFIX  43
H5    2    0.272900    0.708720    0.297658    11.00000   -1.20000
AFIX   0
C6    1    0.046478    0.587893   -0.002931    11.00000    0.10528    0.02354 =
         0.02599    0.00441   -0.03084   -0.01001
AFIX 137
H6A   2    0.140433    0.611134   -0.028520    11.00000   -1.50000
H6B   2   -0.040644    0.615728    0.018784    11.00000   -1.50000
H6C   2   -0.002984    0.561628   -0.062457    11.00000   -1.50000
AFIX   0
C7    1    0.166855    0.648836    0.626183    11.00000    0.01370    0.01904 =
         0.01412   -0.00391    0.00485   -0.00282
C8    1    0.148253    0.710123    0.580616    11.00000    0.01148    0.01833 =
         0.01616   -0.00480    0.00441   -0.00014
C9    1    0.046720    0.621978    0.698899    11.00000    0.02116    0.02840 =
         0.02024   -0.00236    0.01156   -0.00636
AFIX 137
H9A   2    0.075021    0.579260    0.712065    11.00000   -1.50000
H9B   2   -0.069626    0.625285    0.663276    11.00000   -1.50000
H9C   2    0.055612    0.643693    0.769266    11.00000   -1.50000
AFIX   0
C10   1    0.009201    0.752265    0.603969    11.00000    0.01325    0.02641 =
         0.02375   -0.00549    0.00571    0.00421
AFIX 137
H10A  2   -0.100577    0.735115    0.575039    11.00000   -1.50000
H10B  2    0.025563    0.791315    0.568509    11.00000   -1.50000
H10C  2    0.011193    0.758073    0.683713    11.00000   -1.50000
AFIX   0
C11   1    0.733862    0.622260    0.439437    11.00000    0.00972    0.01833 =
         0.01568   -0.00202    0.00205    0.00088
C12   1    0.714330    0.683458    0.394419    11.00000    0.01183    0.01842 =
         0.01505   -0.00067    0.00225   -0.00220
C13   1    0.873277    0.580066    0.417849    11.00000    0.01634    0.02653 =
         0.02605   -0.00502    0.00573    0.00635
AFIX 137
H13A  2    0.964852    0.582819    0.478036    11.00000   -1.50000
H13B  2    0.917352    0.591005    0.348270    11.00000   -1.50000
H13C  2    0.829455    0.538583    0.413021    11.00000   -1.50000
AFIX   0
C14   1    0.838223    0.711980    0.326188    11.00000    0.01327    0.02986 =
         0.01871    0.00237    0.00653   -0.00236
AFIX 137
H14A  2    0.835420    0.690856    0.255415    11.00000   -1.50000
H14B  2    0.952728    0.709289    0.364880    11.00000   -1.50000
H14C  2    0.808099    0.754574    0.313343    11.00000   -1.50000
AFIX   0
HKLF 4


REM  11448sadabs_a.res in P2(1)/n
REM R1 =  0.0427 for    5077 Fo > 4sig(Fo)  and  0.0663 for all    6779 data
REM    248 parameters refined using      0 restraints

END

WGHT      0.0610      1.3152

REM Highest difference peak  0.702,  deepest hole -0.742,  1-sigma level  0.104
Q1    1   0.4450  0.6228  0.5160  11.00000  0.05    0.70
Q2    1   0.4528  0.7059  0.5166  11.00000  0.05    0.58
Q3    1   0.1956  0.6117  0.1834  11.00000  0.05    0.51
Q4    1  -0.0635  0.7717  0.5373  11.00000  0.05    0.49
Q5    1   0.5591  0.6637  0.5992  11.00000  0.05    0.46
Q6    1   0.4969  0.6953  0.5885  11.00000  0.05    0.45
Q7    1   0.3579  0.6457  0.4255  11.00000  0.05    0.45
Q8    1   0.5830  0.7473  0.6617  11.00000  0.05    0.44
Q9    1   0.1417  0.5684  0.1362  11.00000  0.05    0.44
Q10   1   0.2218  0.5628  0.2205  11.00000  0.05    0.41
Q11   1   0.4973  0.6440  0.5952  11.00000  0.05    0.41
Q12   1  -0.0320  0.5297  0.1131  11.00000  0.05    0.41
Q13   1  -0.0448  0.5647 -0.0252  11.00000  0.05    0.40
Q14   1   0.1474  0.4998  0.0630  11.00000  0.05    0.39
Q15   1   0.0344  0.5473 -0.0573  11.00000  0.05    0.39
Q16   1  -0.0319  0.5172 -0.0561  11.00000  0.05    0.39
Q17   1   0.0419  0.5070  0.0629  11.00000  0.05    0.39
Q18   1   0.1012  0.6355  0.6668  11.00000  0.05    0.38
Q19   1   0.1190  0.5592 -0.0587  11.00000  0.05    0.38
Q20   1   0.3252  0.6413  0.5384  11.00000  0.05    0.38
;
_shelx_res_checksum              29498
_shelx_hkl_file                  
;
   1   0   0   -0.40    0.90
   1   0   0   -0.40    0.90
  -2   0   0    1.80    2.70
   2   0   0    2.00    2.10
   2   0   0    1.30    2.50
   2   0   0    2.50    2.70
   2   0   0    6.70    2.50
   3   0   0   -1.20    2.50
   3   0   0   -2.50    2.90
  -3   0   0   -1.30    3.40
   3   0   0    0.60    3.40
   4   0   0   86.79    8.90
   4   0   0   74.99    6.80
   4   0   0   79.59    7.80
  -4   0   0   80.69    9.00
   5   0   0   -0.90    4.00
   5   0   0   -1.00    4.60
  -5   0   0   -7.00    4.60
   5   0   0    1.60    3.40
   6   0   0  359.66   12.70
  -6   0   0  341.07   20.70
   6   0   0  362.16   16.70
   6   0   0  357.56   12.20
   6   0   0  366.56   18.30
  -6   0   0  349.67   18.90
   7   0   0    5.80    4.10
  -7   0   0    4.10    7.60
   7   0   0   -1.90    7.30
   7   0   0   -2.70    5.90
   7   0   0    4.10    4.70
  -7   0   0    5.40    8.80
  -8   0   0  344.47   24.80
   8   0   0  356.06   15.40
   8   0   0  362.26   15.40
  -8   0   0  312.97   22.20
   8   0   0  383.36   19.80
   8   0   0  343.37   20.80
  -9   0   0   -5.10   10.40
   9   0   0   -9.50    7.40
  -9   0   0   -1.70    9.80
   9   0   0    8.90    9.00
   9   0   0   -1.40    6.10
 -10   0   0   44.40   15.70
  10   0   0   67.89   10.20
  10   0   0   60.29   14.30
 -10   0   0   48.20   15.30
 -11   0   0  -10.60   13.80
  11   0   0   -4.30   12.20
  11   0   0   -1.70    8.30
   0  -1   0    0.30    0.30
   0  -1   0    0.10    0.20
   0  -1   0    0.30    0.30
   0   1   0   -0.20    0.20
   0   1   0   -0.20    0.30
   0   1   0    0.00    0.30
   1  -1   0 1223.28   28.30
   1  -1   0 1357.76   27.20
   1   1   0  995.10   27.70
   1   1   0 1128.19   26.40
   1   1   0 1378.26   27.90
   2  -1   0  412.66   13.20
  -2  -1   0  465.75   14.60
   2  -1   0  425.76   12.20
   2  -1   0  441.86   12.20
   2   1   0  428.36   13.00
   2   1   0  440.56   13.10
  -2   1   0  448.86   13.40
   2   1   0  426.36   12.20
   2   1   0  420.36   12.20
   3  -1   0  116.19    7.90
   3  -1   0  138.09    6.90
  -3  -1   0  129.99    9.00
   3  -1   0  123.59    7.90
   3   1   0  115.59    6.90
  -3   1   0  119.89    7.70
   3   1   0  131.39    7.80
   3   1   0  118.79    6.70
   4  -1   0  135.39    9.70
   4  -1   0  131.29   10.40
  -4  -1   0  153.18   10.80
   4  -1   0  134.49    8.30
  -4   1   0  133.69    9.80
   4   1   0  110.29    9.50
   4   1   0  140.99    8.80
   5  -1   0   13.20    5.20
   5  -1   0    5.60    3.90
  -5  -1   0    6.40    5.80
   5  -1   0    6.10    2.80
   5  -1   0    7.70    2.50
   5  -1   0    1.30    5.00
   5   1   0    9.20    2.60
  -5   1   0   13.80    6.50
   5   1   0    4.20    4.90
   5   1   0    0.80    4.20
  -5   1   0    2.00    5.00
   5   1   0    6.20    2.90
   6  -1   0  247.08   10.20
  -6  -1   0  271.37   17.30
   6  -1   0  252.27   15.80
   6  -1   0  247.48   12.30
   6  -1   0  245.28    9.70
   6  -1   0  230.98   14.40
  -6   1   0  275.07   16.40
   6   1   0  252.07   13.50
   6   1   0  291.17   16.10
  -6   1   0  246.88   18.20
   6   1   0  234.98   10.30
   6   1   0  234.38    9.80
  -7  -1   0  136.49   17.60
   7  -1   0  140.49    9.80
   7  -1   0  132.39   14.50
   7  -1   0  127.49   12.80
   7  -1   0  147.49    9.00
  -7  -1   0  123.49   15.60
   7   1   0  123.39   13.80
  -7   1   0  175.28   15.20
   7   1   0  122.19    8.70
   7   1   0  113.99   11.80
  -7   1   0  135.49   16.70
   7   1   0  112.69    9.50
   8  -1   0   40.60    7.10
   8  -1   0   51.39   11.20
   8  -1   0   37.80    8.80
  -8  -1   0   71.19   14.50
  -8  -1   0   75.89   14.70
   8  -1   0   50.59    6.40
   8   1   0   39.90    9.00
  -8   1   0   49.70   12.90
   8   1   0   63.09   11.50
  -8   1   0   53.39   12.00
   8   1   0   63.49    7.60
  -9  -1   0    7.60   11.80
   9  -1   0   -0.30    6.90
  -9  -1   0    4.90   10.00
   9  -1   0    0.40    6.10
   9  -1   0    4.40    9.50
   9   1   0    1.10    6.20
  -9   1   0   -7.30    9.50
   9   1   0   10.10    9.00
  -9   1   0    4.90   11.00
 -10  -1   0   12.20   13.10
  10  -1   0    8.10   10.10
  10  -1   0   -1.00    7.50
 -10  -1   0   10.60   12.80
 -10   1   0    3.80   12.00
  10   1   0   -1.00    9.40
  10   1   0   13.50    7.60
 -10   1   0   -0.70   11.90
 -11  -1   0    8.60   14.30
  11  -1   0   -3.20   12.20
  11  -1   0    1.20    8.80
  11   1   0   -4.70    8.40
  11   1   0   -6.70   11.60
 -11   1   0    6.70   14.30
   0  -2   0    0.10    0.50
   0  -2   0    0.00    0.50
   0  -2   0    0.10    0.40
   0   2   0    0.40    0.50
   0   2   0   -0.30    0.40
   0   2   0    0.30    0.40
   0   2   0    0.40    0.50
   1  -2   0  935.91   23.00
   1  -2   0  924.11   21.30
   1  -2   0  924.81   21.80
   1  -2   0  897.61   22.50
  -1  -2   0  928.71   23.60
   1   2   0  947.81   21.60
   1   2   0  944.91   21.50
   1   2   0  942.81   22.70
  -1   2   0  917.31   22.50
  -1   2   0  937.21   23.00
   1   2   0  983.80   21.70
   1   2   0  949.80   22.60
   2  -2   0  361.66    9.20
   2  -2   0  349.67    9.00
   2  -2   0  348.37   12.00
   2  -2   0  361.86   10.80
  -2  -2   0  382.26   13.60
   2  -2   0  374.16   10.40
   2  -2   0  399.36   12.70
   2   2   0  366.76   12.00
   2   2   0  359.76   10.20
   2   2   0  355.96    9.50
  -2   2   0  363.56   11.10
  -2   2   0  358.96   12.40
   2   2   0  371.76   11.50
   2   2   0  366.26    9.40
   3  -2   0    3.60    3.50
   3  -2   0    0.20    2.60
  -3  -2   0   -1.00    3.80
  -3   2   0   -1.60    3.80
   3   2   0    4.70    1.80
   3   2   0    1.60    3.60
   3   2   0    3.30    2.60
  -3   2   0    6.50    3.40
   3   2   0    3.60    1.80
  -4  -2   0  366.36   16.80
   4  -2   0  357.26   15.70
   4  -2   0  366.36   13.50
   4  -2   0  361.66   10.50
   4  -2   0  379.76   15.80
  -4   2   0  367.86   15.10
   4   2   0  354.16   10.70
   4   2   0  355.86   13.20
   4   2   0  372.06   14.90
   4   2   0  359.76   10.70
  -4   2   0  381.26   17.50
   5  -2   0  185.38   12.40
  -5  -2   0  184.18   13.20
   5  -2   0  178.38   11.90
   5  -2   0  173.78    7.50
   5  -2   0  155.68    9.70
   5  -2   0  164.48    7.00
  -5   2   0  165.48   13.40
  -5   2   0  150.78   11.20
   5   2   0  180.98    7.60
   5   2   0  158.78    7.30
   5   2   0  167.58   11.40
   5   2   0  166.68    9.70
  -6  -2   0  291.87   18.50
   6  -2   0  265.37   13.20
   6  -2   0  270.67   10.40
   6  -2   0  283.97   16.30
   6  -2   0  261.57   11.00
   6  -2   0  286.67   17.00
   6   2   0  264.37   10.70
   6   2   0  286.77   16.10
  -6   2   0  263.57   16.00
   6   2   0  284.97   13.80
  -6   2   0  280.77   17.90
   6   2   0  280.87   11.40
  -7  -2   0  781.12   33.00
   7  -2   0  750.32   25.20
   7  -2   0  789.62   23.40
   7  -2   0  808.42   29.20
   7  -2   0  809.12   30.70
   7  -2   0  764.82   22.70
  -7   2   0  821.82   31.30
   7   2   0  775.42   23.50
   7   2   0  741.43   28.90
   7   2   0  753.82   22.90
  -7   2   0  842.72   35.10
   7   2   0  737.93   26.30
  -8  -2   0  143.19   19.70
   8  -2   0  169.48   17.30
   8  -2   0  122.69   13.70
   8  -2   0  139.79   10.90
  -8  -2   0  165.88   19.50
   8   2   0  157.98   16.10
   8   2   0  165.28   11.10
  -8   2   0  123.29   17.90
  -8   2   0  147.59   17.40
   8   2   0  148.29   13.20
   9  -2   0   -1.40    6.40
  -9  -2   0   15.80   11.30
   9  -2   0   -6.50    8.50
   9  -2   0    4.70    8.20
  -9  -2   0    0.80   10.90
  -9   2   0    1.60   10.60
  -9   2   0   -7.10   10.30
   9   2   0    0.80    6.10
   9   2   0   17.90    8.90
 -10  -2   0   35.80   13.60
  10  -2   0   14.10    7.90
  10  -2   0   15.10   11.70
 -10  -2   0   -2.20   13.10
 -10   2   0   -1.20   12.70
  10   2   0   39.70    9.00
  10   2   0   10.20   11.10
  11  -2   0   60.69   16.80
  11  -2   0   69.59   11.00
 -11  -2   0   45.40   17.10
 -11  -2   0   80.19   20.60
  11   2   0   60.59   16.70
 -11   2   0   55.89   18.00
  11   2   0   62.39   11.50
   0  -3   0    0.30    1.10
   0  -3   0   -1.30    1.20
   0   3   0    0.20    1.20
   0   3   0    1.30    1.20
   0   3   0   -0.50    1.00
   0   3   0   -0.70    0.90
   1  -3   0 1670.63   40.00
   1  -3   0 1672.43   38.30
  -1  -3   0 1648.94   40.70
   1  -3   0 1675.83   39.40
   1  -3   0 1749.12   38.70
  -1  -3   0 1703.53   38.50
  -1   3   0 1744.73   39.10
  -1   3   0 1690.63   38.30
   1   3   0 1713.63   37.90
   1   3   0 1695.43   39.50
   1   3   0 1735.13   39.20
   1   3   0 1764.22   38.00
   1   3   0 1694.33   38.70
  -1   3   0 1742.73   39.80
   2  -3   0   39.30    3.10
   2  -3   0   35.90    3.00
   2  -3   0   34.30    3.70
   2  -3   0   37.90    5.30
  -2  -3   0   40.80    5.80
   2  -3   0   33.40    4.50
   2   3   0   37.90    4.60
  -2   3   0   41.90    5.00
  -2   3   0   43.50    3.70
   2   3   0   36.30    3.20
   2   3   0   39.00    2.90
   2   3   0   35.50    3.10
   2   3   0   46.40    4.30
   3  -3   0  272.37   10.30
   3  -3   0  242.58   11.50
   3  -3   0  261.57    8.10
   3  -3   0  270.77    8.40
   3  -3   0  256.67   12.50
  -3  -3   0  264.77   13.40
   3   3   0  272.87    9.40
   3   3   0  264.77    8.80
   3   3   0  273.47   11.10
  -3   3   0  273.87   12.60
  -3   3   0  271.37   10.40
   3   3   0  266.07    8.60
   4  -3   0  116.29    6.20
   4  -3   0  103.79    7.90
  -4  -3   0  123.89   10.90
   4  -3   0  107.89    5.60
   4  -3   0  116.49   10.30
   4  -3   0  123.09   10.70
  -4   3   0  114.59   10.50
   4   3   0  106.79    6.10
   4   3   0  116.39    6.20
   4   3   0  102.39    7.30
  -4   3   0  128.79    8.90
   5  -3   0  178.48   10.10
   5  -3   0  179.08    7.80
   5  -3   0  188.78    8.20
   5  -3   0  184.08   12.80
  -5  -3   0  193.38   13.90
   5  -3   0  186.08   12.30
   5   3   0  177.98    8.20
   5   3   0  190.18    9.90
  -5   3   0  172.98   13.40
   5   3   0  183.28    8.00
   5   3   0  174.48   11.60
  -5   3   0  181.38   11.30
   6  -3   0   10.80    4.50
   6  -3   0   12.40    7.30
  -6  -3   0   14.50    7.80
   6  -3   0    5.40    3.40
   6  -3   0    8.50    6.90
   6  -3   0   -0.50    4.50
   6   3   0    8.70    3.70
   6   3   0   11.60    6.10
   6   3   0   10.50    4.30
  -6   3   0    6.20    7.30
  -6   3   0    6.50    6.20
   6   3   0    9.00    4.90
  -7  -3   0  964.60   37.20
   7  -3   0  874.71   28.20
   7  -3   0  885.31   25.80
   7  -3   0  949.11   33.10
   7  -3   0  869.21   32.90
   7  -3   0  870.51   25.50
   7   3   0  911.31   31.90
   7   3   0  943.61   28.90
  -7   3   0  882.81   36.50
   7   3   0  888.81   26.20
  -7   3   0  872.81   32.50
   7   3   0  895.71   26.10
   8  -3   0    8.30    8.50
  -8  -3   0   20.30   12.00
   8  -3   0   18.20    6.10
  -8  -3   0    6.80    9.90
   8  -3   0   18.50    8.80
  -8   3   0    0.70    8.70
  -8   3   0    8.20    8.20
   8   3   0    8.90    6.50
   8   3   0    8.80    5.50
   8   3   0   10.60    8.00
   9  -3   0   11.70    8.90
  -9  -3   0   -8.30   10.80
  -9  -3   0    8.20   11.90
   9  -3   0    7.00    6.60
   9  -3   0    8.60   10.30
  -9   3   0    4.00   10.80
   9   3   0   12.60    8.70
  -9   3   0   18.40   12.10
   9   3   0   12.00    6.30
 -10  -3   0   47.20   16.10
  10  -3   0   46.60   14.60
 -10  -3   0   73.99   17.60
  10  -3   0   63.09    9.40
 -10   3   0   55.59   16.60
  10   3   0   73.09   10.40
  10   3   0   47.50   13.40
 -11  -3   0   22.20   16.50
  11  -3   0   11.20    8.80
  11  -3   0    8.00   13.50
 -11  -3   0    9.60   14.80
  11   3   0   23.00    9.20
 -11   3   0  -16.30   15.40
 -11   3   0    9.50   14.40
  11   3   0    9.80   13.10
   0  -4   0 1626.84   36.30
   0  -4   0 1535.65   36.10
   0  -4   0 1522.75   35.90
   0   4   0 1584.04   36.00
   0   4   0 1507.95   35.50
   0   4   0 1613.64   35.50
   0   4   0 1574.74   36.50
  -1  -4   0   49.00    4.20
   1  -4   0   44.30    4.00
   1  -4   0   59.09    4.40
   1  -4   0   59.19    5.40
  -1  -4   0   66.09    6.10
   1  -4   0   42.20    4.20
   1  -4   0   49.00    4.00
  -1   4   0   51.89    4.00
   1   4   0   54.79    3.30
  -1   4   0   55.49    4.80
  -1   4   0   56.59    4.30
   1   4   0   50.59    4.30
   1   4   0   53.69    4.60
   1   4   0   49.00    4.40
   1   4   0   49.90    4.20
   2  -4   0    1.90    2.40
   2  -4   0    5.50    2.00
   2  -4   0    6.80    3.20
   2  -4   0    5.30    2.30
   2  -4   0    7.30    3.70
  -2  -4   0    2.30    3.70
  -2   4   0    8.40    3.00
   2   4   0    3.70    2.90
  -2   4   0    2.30    3.10
  -2   4   0    6.90    1.80
   2   4   0    8.70    2.60
   2   4   0    5.90    2.70
   2   4   0    7.40    2.20
   3  -4   0  175.58   11.20
   3  -4   0  172.18    7.10
   3  -4   0  177.58    7.50
   3  -4   0  183.88   10.70
  -3  -4   0  192.78   12.10
   3   4   0  172.18    6.90
   3   4   0  171.28    7.60
   3   4   0  187.28    8.80
  -3   4   0  185.38   10.50
  -3   4   0  188.18    8.20
   3   4   0  178.18    7.70
   4  -4   0   40.70    5.50
   4  -4   0   29.70    3.70
  -4  -4   0   31.00    7.60
   4  -4   0   23.20    6.40
   4  -4   0   31.50    4.20
   4   4   0   27.90    4.20
  -4   4   0   23.20    6.50
  -4   4   0   25.80    5.40
   4   4   0   27.70    4.10
   4   4   0   37.10    6.70
   4   4   0   29.60    4.00
   5  -4   0   70.39    9.50
   5  -4   0   83.69    7.90
   5  -4   0   69.49    5.60
   5  -4   0   91.49   10.70
   5  -4   0   74.89    6.50
  -5  -4   0   66.99   10.60
  -5   4   0   83.69   10.70
   5   4   0   76.39    6.10
   5   4   0   72.79    8.30
   5   4   0   73.49    6.40
   5   4   0   76.29    6.90
  -5   4   0   81.59    8.70
   6  -4   0   11.80    5.20
   6  -4   0   14.90    4.80
   6  -4   0   21.10    7.60
  -6  -4   0   17.90    8.50
   6  -4   0   13.10    3.80
   6  -4   0   16.70    7.40
   6   4   0   15.90    5.00
   6   4   0   17.30    6.90
   6   4   0   23.60    4.80
  -6   4   0   16.80    6.50
   6   4   0   18.90    4.20
  -6   4   0    1.80    7.30
   7  -4   0   69.29    6.90
   7  -4   0   66.39    7.40
   7  -4   0   61.49   11.30
  -7  -4   0   93.49   14.90
   7  -4   0   58.99   10.80
   7  -4   0   61.09    8.60
  -7   4   0   59.09   12.50
   7   4   0   64.49    7.70
  -7   4   0   69.09   10.90
   7   4   0   88.49   11.40
   7   4   0   93.89    8.30
   7   4   0   67.79    7.50
   8  -4   0  137.19   15.30
   8  -4   0  130.69   16.10
   8  -4   0  123.69   10.70
  -8  -4   0  144.49   18.80
  -8   4   0  130.09   18.00
   8   4   0  114.29   10.90
  -8   4   0  139.39   15.80
   8   4   0  159.38   16.00
   9  -4   0  170.78   18.30
  -9  -4   0  143.49   21.20
   9  -4   0  116.89   15.20
  -9  -4   0  150.78   21.70
   9   4   0  137.49   12.40
  -9   4   0  138.29   19.70
   9   4   0  140.39   16.30
  10  -4   0    8.80   10.80
 -10  -4   0   18.10   13.30
  10  -4   0    2.60   11.10
  10  -4   0   23.30    7.80
 -10  -4   0    4.80   14.00
  10   4   0   14.50   11.50
 -10   4   0    3.00   13.30
  10   4   0   15.90    8.40
 -10   4   0   16.40   13.20
  11  -4   0   -6.00   12.00
 -11  -4   0   25.80   16.10
  11  -4   0    4.30    8.70
 -11  -4   0   14.80   15.60
 -11   4   0   -7.90   15.60
  11   4   0   11.50   12.50
 -11   4   0   23.70   14.30
  11   4   0    4.00    9.00
   0  -5   0    4.10    2.40
   0  -5   0    1.80    2.50
   0  -5   0   -1.30    2.30
   0   5   0    4.40    2.30
   0   5   0   -1.60    2.10
   0   5   0    3.00    2.10
   0   5   0    0.70    2.20
   1  -5   0  441.56   12.70
  -1  -5   0  429.46   12.70
  -1  -5   0  437.26   11.40
   1  -5   0  422.26   14.00
  -1  -5   0  411.76   14.30
   1  -5   0  424.66   12.40
   1  -5   0  421.36   12.80
  -1   5   0  411.66   13.10
   1   5   0  456.95   13.00
   1   5   0  420.46   13.00
  -1   5   0  405.86   12.30
   1   5   0  457.65   11.30
  -1   5   0  423.76   12.60
   2  -5   0  772.02   20.30
   2  -5   0  737.43   21.50
   2  -5   0  740.93   22.40
   2  -5   0  729.63   19.30
  -2  -5   0  754.22   23.60
   2   5   0  777.32   19.30
  -2   5   0  743.73   21.00
   2   5   0  756.42   19.20
   2   5   0  760.52   21.50
  -2   5   0  720.63   21.90
   2   5   0  752.02   20.10
   3  -5   0  784.42   20.80
   3  -5   0  784.82   24.10
   3  -5   0  825.52   25.70
   3  -5   0  785.32   20.90
   3  -5   0  790.62   22.20
  -3  -5   0  806.52   26.70
   3   5   0  790.22   21.50
   3   5   0  778.82   21.30
  -3   5   0  762.92   25.10
  -3   5   0  781.62   20.50
  -3   5   0  790.82   24.20
   3   5   0  798.42   22.00
   4  -5   0 1534.55   37.10
  -4  -5   0 1522.35   44.90
   4  -5   0 1581.44   42.10
   4  -5   0 1482.85   36.80
   4  -5   0 1522.65   38.90
  -4   5   0 1532.45   42.70
   4   5   0 1482.75   37.40
   4   5   0 1542.95   39.70
  -4   5   0 1557.94   38.50
   4   5   0 1525.75   37.60
   5  -5   0  344.07   14.20
   5  -5   0  352.06   17.60
   5  -5   0  365.96   12.80
   5  -5   0  352.96   12.40
  -5  -5   0  381.36   20.10
   5  -5   0  363.36   17.50
   5   5   0  353.36   13.10
   5   5   0  343.97   12.90
   5   5   0  345.27   12.40
  -5   5   0  344.27   14.50
  -5   5   0  339.07   17.80
   5   5   0  353.26   15.50
   6  -5   0  106.79    7.80
   6  -5   0   82.89   11.60
  -6  -5   0  113.29   14.80
   6  -5   0  101.69   12.60
   6  -5   0   94.79    9.00
   6  -5   0   95.99    8.40
  -6   5   0  100.69   10.90
   6   5   0   97.69    8.60
   6   5   0  104.79    8.30
  -6   5   0  116.39   13.90
   6   5   0  102.09    8.40
   6   5   0  100.99   10.90
  -7  -5   0  456.35   26.20
   7  -5   0  430.46   22.80
   7  -5   0  382.16   17.10
   7  -5   0  425.16   22.50
   7  -5   0  366.46   15.10
   7  -5   0  381.26   15.50
  -7   5   0  375.56   19.70
   7   5   0  375.06   16.10
  -7   5   0  412.16   24.00
   7   5   0  394.86   19.90
   7   5   0  373.36   15.40
   7   5   0  388.56   15.50
   8  -5   0    2.10    5.50
   8  -5   0    2.70    7.50
   8  -5   0    6.80    8.90
  -8  -5   0   -1.60    9.50
  -8   5   0    0.80    8.50
   8   5   0   -1.30    5.30
  -8   5   0    4.30    8.80
   8   5   0    1.70    6.90
  -9  -5   0   20.40   13.60
   9  -5   0   36.00   11.40
   9  -5   0   27.30   10.30
  -9  -5   0   26.00   14.00
   9  -5   0   13.70    7.00
   9   5   0   29.60    8.00
   9   5   0   34.10   10.80
  -9   5   0    9.90   11.30
  -9   5   0   22.00   12.20
 -10  -5   0   32.70   16.30
 -10  -5   0   29.90   14.60
  10  -5   0   21.20    8.70
  10  -5   0   12.30   12.00
  10  -5   0   21.70   11.50
  10   5   0   14.80    8.90
 -10   5   0   18.60   14.70
  10   5   0   27.90   11.70
 -10   5   0   29.50   14.10
  11  -5   0   -0.10   13.00
  11  -5   0   -3.70    8.50
 -11  -5   0   36.40   17.20
 -11  -5   0   -3.50   13.50
  11   5   0   10.30   11.80
 -11   5   0    5.50   13.50
 -11   5   0    6.10   15.00
  11   5   0    2.30    9.20
   0  -6   0  940.21   24.40
   0  -6   0  966.40   24.60
   0  -6   0 1004.80   24.80
   0   6   0  878.51   23.50
   0   6   0 1004.40   23.70
   0   6   0  973.10   25.00
   0   6   0  934.91   24.20
  -1  -6   0  498.45   13.30
   1  -6   0  457.55   14.20
  -1  -6   0  488.05   14.40
   1  -6   0  511.35   16.20
  -1  -6   0  475.15   16.10
   1  -6   0  496.55   14.70
   1  -6   0  484.05   14.30
   1   6   0  499.85   14.60
  -1   6   0  488.05   15.10
  -1   6   0  481.15   14.40
   1   6   0  496.25   12.60
   1   6   0  471.55   14.80
  -1   6   0  456.15   13.70
   2  -6   0   45.40    5.50
  -2  -6   0   56.69    7.50
   2  -6   0   48.70    6.50
   2  -6   0   47.70    5.10
   2  -6   0   43.90    4.40
   2   6   0   47.30    4.10
  -2   6   0   54.09    5.60
   2   6   0   44.10    5.30
   2   6   0   48.90    4.90
   2   6   0   57.49    4.70
  -2   6   0   47.10    5.70
   2   6   0   44.40    4.60
   3  -6   0  340.77   12.50
   3  -6   0  343.27   13.20
   3  -6   0  350.66   16.60
   3  -6   0  342.27   12.20
  -3  -6   0  371.86   17.40
   3  -6   0  366.26   15.50
  -3   6   0  364.16   14.60
   3   6   0  336.97   12.70
  -3   6   0  363.16   15.90
   3   6   0  381.26   13.20
  -3   6   0  352.76   10.40
   3   6   0  351.86   12.70
   4  -6   0   80.59    9.40
   4  -6   0   82.69    6.90
   4  -6   0   83.69    6.30
  -4  -6   0   89.59   11.40
   4  -6   0  106.99   11.50
  -4   6   0   89.29    6.30
   4   6   0   70.69    6.80
  -4   6   0   93.59    9.60
   4   6   0   96.39    8.00
   4   6   0   81.49    7.10
  -4   6   0  108.59   10.90
   5  -6   0    3.30    4.30
   5  -6   0   -4.90    5.50
   5  -6   0    2.10    3.90
   5  -6   0    5.20    3.50
  -5  -6   0   -4.10    6.50
   5  -6   0   -0.20    5.70
  -5   6   0    4.30    5.10
  -5   6   0   -0.60    3.90
   5   6   0   -0.80    3.40
   5   6   0   -1.30    3.20
  -5   6   0    3.50    5.90
   6  -6   0  251.37   12.10
   6  -6   0  255.47   13.80
   6  -6   0  292.97   12.90
   6  -6   0  280.47   18.10
  -6  -6   0  295.07   20.10
   6  -6   0  282.87   18.20
  -6   6   0  244.78   14.00
   6   6   0  285.77   15.50
  -6   6   0  302.77   19.40
   6   6   0  266.47   13.20
  -6   6   0  272.97   18.20
   6   6   0  265.47   12.40
   7  -6   0   23.70    6.10
   7  -6   0   13.10    8.40
  -7  -6   0    8.10    9.60
   7  -6   0   27.70    5.70
   7  -6   0   39.40    7.40
   7  -6   0   20.40    8.70
   7   6   0   30.80    8.40
  -7   6   0   31.80   10.60
  -7   6   0   18.80    9.00
   7   6   0   22.30    6.20
  -7   6   0   15.40    7.80
  -8  -6   0  297.37   24.10
   8  -6   0  287.57   20.50
   8  -6   0  311.57   21.30
  -8   6   0  368.26   24.90
   8   6   0  297.57   16.00
   8   6   0  273.57   18.20
  -8   6   0  267.37   21.60
  -9  -6   0  267.17   27.60
   9  -6   0  238.58   14.70
   9  -6   0  225.98   20.60
   9  -6   0  245.18   22.90
  -9   6   0  213.18   22.80
  -9   6   0  240.28   24.40
   9   6   0  208.58   19.30
   9   6   0  200.88   15.40
  10  -6   0   71.89   10.80
 -10  -6   0   74.69   18.50
  10  -6   0   80.19   16.20
  10  -6   0   76.39   15.30
 -10  -6   0   69.99   18.30
 -10   6   0   87.29   17.70
 -10   6   0   79.59   18.70
  10   6   0  100.19   12.10
  10   6   0   98.19   15.30
 -11  -6   0    4.90   16.60
 -11  -6   0    6.30   13.90
  11  -6   0   17.00    9.40
  11  -6   0   -7.90   12.30
  11   6   0   -3.10    9.10
 -11   6   0  -13.00   13.60
 -11   6   0    0.30   16.20
   0  -7   0    2.70    2.70
   0  -7   0    6.00    3.00
   0  -7   0   -1.00    2.90
   0   7   0    2.20    2.30
   0   7   0    3.40    2.50
   0   7   0    2.60    2.20
   0   7   0   -0.60    2.40
   1  -7   0   23.10    5.00
   1  -7   0   21.20    2.70
   1  -7   0   20.50    3.80
  -1  -7   0   20.50    4.80
  -1  -7   0   16.30    3.60
  -1  -7   0   17.20    3.20
   1  -7   0   27.20    4.30
   1  -7   0   21.60    3.70
  -1   7   0   23.40    3.90
  -1   7   0   22.70    3.60
  -1   7   0   22.80    3.50
   1   7   0   20.00    3.70
   1   7   0   21.90    3.80
   1   7   0   23.20    2.90
   2  -7   0   12.40    4.10
  -2  -7   0    4.00    2.30
  -2  -7   0    3.50    4.90
   2  -7   0    9.00    5.30
   2  -7   0    6.10    3.30
   2  -7   0    6.20    3.90
   2  -7   0    8.30    3.40
  -2   7   0    9.80    3.80
   2   7   0    2.80    3.80
   2   7   0    7.90    3.40
   2   7   0   10.50    3.20
   2   7   0    5.20    2.80
  -2   7   0    9.50    4.00
   3  -7   0   54.99    6.60
  -3  -7   0   64.29    9.70
   3  -7   0   54.59    9.40
   3  -7   0   54.29    5.80
   3  -7   0   50.39    7.50
   3   7   0   70.99    6.60
   3   7   0   66.89    6.40
  -3   7   0   73.59    7.80
  -3   7   0   67.49    8.20
   3   7   0   55.49    6.20
   4  -7   0  683.73   25.60
   4  -7   0  724.43   20.70
   4  -7   0  685.13   20.40
   4  -7   0  704.93   21.90
  -4  -7   0  699.53   27.40
   4  -7   0  708.73   24.70
  -4   7   0  672.03   18.90
  -4   7   0  692.33   23.90
   4   7   0  690.73   21.30
   4   7   0  688.93   20.80
   4   7   0  694.33   21.40
  -4   7   0  682.03   25.40
   5  -7   0   87.39   11.10
   5  -7   0   74.69   10.10
   5  -7   0   83.79    7.60
   5  -7   0   73.99    6.90
   5  -7   0   78.39    8.20
  -5  -7   0   74.39   11.70
  -5   7   0   80.99   10.80
   5   7   0   82.39    7.80
   5   7   0   75.89    7.10
  -5   7   0   69.39    9.90
  -5   7   0   84.59    7.50
   6  -7   0  252.77   12.50
   6  -7   0  248.78   12.10
   6  -7   0  249.78   13.50
   6  -7   0  253.37   17.60
   6  -7   0  228.28   17.50
  -6  -7   0  242.58   19.90
   6   7   0  244.18   13.20
  -6   7   0  242.98   16.70
  -6   7   0  245.08   13.00
   6   7   0  235.78   14.30
   6   7   0  215.68   12.20
  -6   7   0  253.47   18.00
  -7  -7   0    1.10    9.00
   7  -7   0   -5.20    5.00
   7  -7   0   -1.30    7.60
   7  -7   0    4.10    7.60
   7  -7   0   -0.20    4.80
   7   7   0   -0.90    6.00
  -7   7   0    4.60    7.50
  -7   7   0    1.50    8.50
   7   7   0   -9.50    4.80
  -7   7   0    2.60    6.30
   8  -7   0  132.19   17.20
   8  -7   0  147.79   11.90
   8  -7   0  163.48   17.90
  -8  -7   0  144.89   20.30
  -8   7   0  156.78   18.40
   8   7   0  163.38   15.20
  -8   7   0  148.29   18.50
   8   7   0  149.29   12.90
   9  -7   0   43.20    8.80
   9  -7   0   33.70   12.50
   9  -7   0   38.40   12.20
  -9  -7   0   19.80   14.30
   9   7   0   38.90    9.60
  -9   7   0   47.80   13.80
   9   7   0   33.10   10.40
  -9   7   0   27.90   12.60
  10  -7   0   -0.20    7.20
  10  -7   0   10.70   11.40
  10  -7   0    1.80    9.80
 -10  -7   0    9.40   13.10
 -10  -7   0   -6.20   11.80
  10   7   0   13.50   10.70
 -10   7   0    1.50   12.40
  10   7   0   17.90    8.90
 -10   7   0  -22.40   10.90
  11  -7   0  121.79   19.70
 -11  -7   0   83.39   19.60
  11  -7   0   75.89   12.30
 -11  -7   0   91.19   21.80
 -11   7   0  116.29   20.30
 -11   7   0  103.49   23.50
  11   7   0  131.29   15.70
   0  -8   0 1237.68   31.40
   0  -8   0 1261.97   31.90
   0  -8   0 1214.98   31.70
   0   8   0 1152.58   30.30
   0   8   0 1255.97   32.20
   0   8   0 1211.28   31.30
   0   8   0 1224.08   30.20
  -1  -8   0 1418.16   35.20
   1  -8   0 1382.46   34.70
   1  -8   0 1325.87   34.20
   1  -8   0 1420.16   36.90
  -1  -8   0 1405.96   33.70
   1  -8   0 1376.96   32.10
  -1  -8   0 1335.87   36.60
  -1   8   0 1385.86   35.10
  -1   8   0 1395.86   33.70
  -1   8   0 1275.67   34.80
   1   8   0 1398.06   34.80
   1   8   0 1398.26   32.40
   1   8   0 1345.87   35.40
   2  -8   0   23.10    4.50
   2  -8   0   27.60    5.60
  -2  -8   0   20.90    6.60
  -2  -8   0   21.80    3.50
  -2  -8   0   30.60    4.80
   2  -8   0   20.80    6.40
   2  -8   0   19.70    5.00
  -2   8   0   21.50    5.30
   2   8   0   23.60    4.90
  -2   8   0   31.90    5.50
   2   8   0   15.50    5.00
   2   8   0   33.90    4.20
   2   8   0   29.70    4.00
   3  -8   0  761.32   22.10
  -3  -8   0  728.13   27.40
   3  -8   0  738.63   26.50
   3  -8   0  761.92   24.70
   3  -8   0  766.62   23.20
   3   8   0  782.42   21.50
  -3   8   0  763.32   23.80
   3   8   0  773.22   23.20
  -3   8   0  748.13   25.00
   3   8   0  769.92   25.00
   3   8   0  786.62   21.30
   4  -8   0  553.54   21.30
   4  -8   0  534.95   18.10
   4  -8   0  575.04   18.20
   4  -8   0  547.05   19.10
  -4  -8   0  597.74   25.00
   4  -8   0  576.64   23.60
   4   8   0  584.84   18.40
  -4   8   0  545.35   14.80
  -4   8   0  571.24   22.60
  -4   8   0  514.95   20.60
   4   8   0  550.14   19.90
   4   8   0  578.64   19.10
  -5  -8   0  321.07   21.20
   5  -8   0  339.67   13.90
   5  -8   0  314.07   18.10
   5  -8   0  380.36   15.60
   5  -8   0  363.56   14.70
  -5   8   0  356.56   19.00
   5   8   0  351.76   15.30
   5   8   0  352.26   14.60
  -5   8   0  364.06   17.90
   5   8   0  344.17   14.90
  -5   8   0  324.67   12.30
   6  -8   0  160.18   15.60
   6  -8   0  188.58   12.30
   6  -8   0  183.38   11.40
  -6  -8   0  187.98   19.80
   6  -8   0  165.78   10.80
   6  -8   0  186.98   17.00
   6   8   0  170.38   11.00
  -6   8   0  219.68   16.20
   6   8   0  180.58   12.30
   6   8   0  199.18   13.00
  -6   8   0  177.48   16.80
  -6   8   0  182.98   11.00
   7  -8   0    9.70    5.60
   7  -8   0    0.80    7.30
   7  -8   0   -2.80    5.20
   7  -8   0   -4.30    7.10
  -7  -8   0   -4.50    9.90
  -7   8   0   -0.40    7.80
   7   8   0   10.20    6.80
   7   8   0    4.90    5.40
  -7   8   0   -3.40    7.90
   8  -8   0   20.00   10.80
   8  -8   0   21.40    6.70
  -8  -8   0   21.30   12.60
   8  -8   0   24.00   10.70
  -8   8   0   37.70   12.10
  -8   8   0   36.90   11.80
   8   8   0   39.30    8.80
   8   8   0   29.30    8.20
  -9  -8   0   51.59   16.90
   9  -8   0   57.79   14.50
   9  -8   0   53.99    9.30
   9  -8   0   21.60   11.30
   9   8   0   43.70   10.10
  -9   8   0   45.20   13.30
   9   8   0   64.69   12.10
  -9   8   0   68.39   15.30
  10  -8   0    0.60   11.10
  10  -8   0   -9.70    7.80
  10  -8   0   18.70   11.60
 -10  -8   0    6.30   14.60
 -10  -8   0   -6.80   14.60
 -10   8   0    3.80   13.60
 -10   8   0  -22.90   12.50
  10   8   0    3.50    8.80
  11  -8   0   55.69   11.20
 -11  -8   0   72.99   20.80
  11  -8   0   69.19   17.60
  11   8   0   95.09   14.80
 -11   8   0   87.19   23.40
   0  -9   0    1.20    4.00
   0  -9   0   -2.10    3.70
   0  -9   0    3.70    3.90
   0   9   0    0.90    3.00
   0   9   0   -7.50    2.70
   0   9   0   -0.90    3.40
   0   9   0    0.10    3.10
   1  -9   0  637.84   19.20
  -1  -9   0  647.24   20.20
  -1  -9   0  627.84   21.60
   1  -9   0  644.24   19.70
   1  -9   0  640.94   21.60
   1  -9   0  644.44   17.30
  -1  -9   0  639.14   18.80
  -1   9   0  619.74   18.50
  -1   9   0  670.83   20.30
   1   9   0  644.24   19.70
   1   9   0  658.73   20.70
   1   9   0  647.24   17.30
  -1   9   0  628.84   19.80
  -2  -9   0  110.99    6.70
   2  -9   0  105.19    8.70
   2  -9   0   97.99    8.70
   2  -9   0   95.09   10.10
  -2  -9   0  105.09   11.30
  -2  -9   0  104.49    8.40
   2  -9   0  103.79    9.10
  -2   9   0   97.19    7.70
   2   9   0   97.59    8.70
  -2   9   0   96.19    8.10
  -2   9   0  105.09    8.70
   2   9   0   90.89    8.40
   2   9   0  105.39    6.30
   3  -9   0  133.09   12.30
   3  -9   0  134.49    9.00
   3  -9   0  138.19   10.30
  -3  -9   0  143.59   12.80
  -3  -9   0  142.09    6.00
   3  -9   0  140.49    9.70
   3   9   0  121.89    9.10
  -3   9   0  150.78   10.90
   3   9   0  135.19    8.00
   3   9   0  145.99    7.80
   3   9   0  133.89   10.70
   3   9   0  158.48    9.90
  -3   9   0  146.49    9.80
  -4  -9   0   64.89   11.40
   4  -9   0   47.20    6.10
   4  -9   0   45.30    6.30
   4  -9   0   54.49    8.40
   4  -9   0   66.39   10.60
   4  -9   0   36.30    6.20
  -4   9   0   44.00    8.00
   4   9   0   61.29    6.90
   4   9   0   47.50    6.50
  -4   9   0   54.49    7.60
  -5  -9   0    5.50    7.80
   5  -9   0    5.70    6.90
   5  -9   0    5.20    4.00
   5  -9   0    7.00    5.70
   5  -9   0    5.00    4.60
  -5   9   0    7.60    6.00
   5   9   0   13.30    5.30
  -5   9   0    4.90    6.40
   5   9   0    7.20    4.30
  -5   9   0    6.60    3.70
   5   9   0    5.50    5.20
   6  -9   0    3.40    5.40
   6  -9   0   -6.50    7.20
   6  -9   0    5.40    4.50
  -6  -9   0   12.80    9.30
   6  -9   0    0.50    5.60
   6  -9   0    6.80    7.60
   6   9   0    3.50    6.00
  -6   9   0   -3.30    7.30
  -6   9   0   13.40    7.70
   6   9   0    6.30    5.30
   7  -9   0   60.89   12.40
  -7  -9   0   56.59   14.30
   7  -9   0   46.00   11.60
   7  -9   0   49.60    8.20
   7  -9   0   60.09    9.00
  -7   9   0   53.79   11.70
   7   9   0   64.79    9.80
   7   9   0   46.70    8.40
  -7   9   0   52.89   12.60
   8  -9   0   87.69   14.80
  -8  -9   0  110.19   18.40
   8  -9   0   73.99    9.40
   8  -9   0   74.39   13.80
   8   9   0   91.29   11.50
  -8   9   0   91.19   15.70
  -8   9   0   82.59   14.40
   8   9   0   85.49   11.80
   9  -9   0  297.47   23.70
   9  -9   0  252.27   22.80
  -9  -9   0  253.67   28.50
   9   9   0  278.17   18.40
   9   9   0  247.98   19.50
  -9   9   0  235.08   24.20
  -9   9   0  273.77   26.40
  10  -9   0   33.30    8.80
  10  -9   0   61.39   15.70
  10  -9   0   49.20   15.80
 -10  -9   0   53.69   17.80
 -10   9   0   37.40   15.60
 -10   9   0   46.80   15.80
  10   9   0   57.99   13.50
   0 -10   0   99.39    9.10
   0 -10   0  123.19    9.30
   0 -10   0  107.09    8.60
   0  10   0   97.89    8.90
   0  10   0  108.49    7.50
   0  10   0  110.79    8.00
   0  10   0  114.89    8.70
   1 -10   0  112.89    9.50
  -1 -10   0  121.29   10.50
  -1 -10   0  115.09    9.40
   1 -10   0  126.09    8.80
  -1 -10   0  120.19    8.60
   1 -10   0  142.69   11.00
   1 -10   0  132.89    7.30
   1  10   0  142.39   10.20
  -1  10   0  131.39    8.30
   1  10   0  131.99    9.20
  -1  10   0  131.29    9.60
   1  10   0  137.79    6.90
  -1  10   0  118.39    9.00
  -2 -10   0   -0.30    4.20
  -2 -10   0   -3.90    5.70
   2 -10   0   -1.10    4.10
   2 -10   0    6.90    5.00
  -2 -10   0    1.80    3.50
   2 -10   0   -2.80    4.60
   2 -10   0   -1.70    5.70
   2  10   0   -2.40    3.10
  -2  10   0    5.20    4.30
  -2  10   0    0.50    3.60
  -2  10   0    1.50    4.50
   2  10   0    0.40    4.10
   2  10   0    6.10    4.70
   3 -10   0  270.77   13.00
  -3 -10   0  313.17   17.70
   3 -10   0  327.37   13.40
  -3 -10   0  307.57   10.00
   3 -10   0  283.37   14.60
   3 -10   0  316.37   14.20
   3 -10   0  318.37   17.70
  -3  10   0  272.57   14.60
   3  10   0  300.87   14.10
   3  10   0  318.47   15.20
  -3  10   0  316.47   13.80
   3  10   0  328.47   11.80
   3  10   0  325.97   11.60
   4 -10   0   87.99   12.00
  -4 -10   0  116.79   14.40
   4 -10   0   88.89    9.20
   4 -10   0  100.19   10.80
   4 -10   0   71.49    7.30
  -4  10   0   78.39    9.70
   4  10   0   79.69    8.40
  -4  10   0   78.09    9.10
   4  10   0   95.19    8.40
  -5 -10   0  315.47   21.20
   5 -10   0  314.77   14.60
   5 -10   0  288.97   17.60
   5 -10   0  304.87   15.40
   5 -10   0  287.97   14.30
  -5  10   0  305.17   18.10
  -5  10   0  316.67   16.90
   5  10   0  309.57   14.20
   5  10   0  292.27   15.10
   6 -10   0   64.49    9.10
  -6 -10   0   83.09   14.80
   6 -10   0   54.89    7.50
   6 -10   0   51.29   11.40
   6 -10   0   50.19   11.10
   6  10   0   64.09    8.60
   6  10   0   63.99    8.80
  -6  10   0   49.60   10.00
  -6  10   0   62.39   11.10
   7 -10   0   14.80    6.40
   7 -10   0   12.20    6.50
  -7 -10   0   -0.10   10.90
   7 -10   0   14.60    9.30
   7 -10   0   17.10    9.60
   7  10   0   13.10    7.20
   7  10   0   15.50    6.80
  -7  10   0    6.40    8.70
  -7  10   0   10.50    8.40
   8 -10   0   -3.00    9.50
   8 -10   0    6.20    6.30
   8 -10   0   11.50   10.10
  -8 -10   0   -5.70   11.80
   8  10   0    3.50    7.60
  -8  10   0   15.80   10.00
   8  10   0   17.40    7.50
  -8  10   0   13.10   10.30
   9 -10   0   13.50    7.50
  -9 -10   0    6.10   13.90
   9 -10   0   13.20   10.30
   9 -10   0   31.40   11.80
   9  10   0   16.90    9.00
  -9  10   0    5.80   11.30
  -9  10   0   19.40   12.10
  10 -10   0   49.10   15.60
  10 -10   0   69.99   11.10
 -10 -10   0   73.39   20.20
  10 -10   0   57.39   15.30
 -10  10   0   57.79   17.40
  10  10   0   70.49   13.40
 -10  10   0   87.09   18.80
   0 -11   0    6.40    4.60
   0 -11   0    4.60    5.30
   0 -11   0    2.70    4.70
   0  11   0   -0.30    3.90
   0  11   0    2.50    3.90
   0  11   0    1.80    4.60
   0  11   0   -3.00    3.90
   1 -11   0  294.97   13.70
   1 -11   0  286.87   12.20
  -1 -11   0  279.87   13.70
  -1 -11   0  302.07   14.90
   1 -11   0  288.07   11.10
   1 -11   0  308.67   15.40
  -1 -11   0  293.27   12.80
   1  11   0  302.67   10.80
  -1  11   0  293.67   13.50
   1  11   0  295.57   14.20
  -1  11   0  292.67   13.10
  -1  11   0  265.97   11.70
   1  11   0  298.77   13.20
  -1  11   0  294.27   13.60
   2 -11   0  872.21   26.60
  -2 -11   0  861.51   23.80
   2 -11   0  880.01   29.50
  -2 -11   0  865.11   26.30
   2 -11   0  915.61   27.30
  -2 -11   0  845.02   30.10
   2 -11   0  897.71   26.70
   2  11   0  870.61   27.50
   2  11   0  899.11   27.00
  -2  11   0  910.01   26.30
   2  11   0  922.81   23.30
  -2  11   0  896.81   27.50
  -2  11   0  812.72   24.70
   3 -11   0   15.10    4.80
  -3 -11   0   21.20    8.60
   3 -11   0   28.20    6.40
   3 -11   0   15.30    5.70
   3 -11   0   10.70    7.10
  -3 -11   0   28.10    3.90
  -3  11   0   21.10    5.80
   3  11   0   32.30    4.70
  -3  11   0   30.80    6.40
   3  11   0   23.80    4.60
   3  11   0   13.60    5.90
   3  11   0   25.70    5.70
  -4 -11   0 1133.69   40.40
   4 -11   0 1157.78   32.60
   4 -11   0 1111.49   35.20
   4 -11   0 1123.29   38.40
   4 -11   0 1123.19   33.40
   4  11   0 1151.98   30.90
   4  11   0 1138.79   30.60
   4  11   0 1140.19   33.90
  -4  11   0 1120.09   36.00
  -4  11   0 1165.08   33.90
   4  11   0 1061.59   32.50
   5 -11   0   -1.00    6.80
  -5 -11   0    5.60    8.40
   5 -11   0   -0.80    4.50
   5 -11   0   10.60    6.30
  -5  11   0    0.90    6.30
   5  11   0    2.40    4.60
  -5  11   0    2.60    6.20
   5  11   0    0.20    5.10
  -6 -11   0   86.59   15.60
   6 -11   0  100.29   10.90
   6 -11   0   85.99    9.40
   6 -11   0  113.39   14.60
   6 -11   0   63.99   12.20
   6  11   0   99.89   10.80
  -6  11   0  106.09   13.90
  -6  11   0  106.49   12.70
   7 -11   0  103.69   15.60
  -7 -11   0  108.79   17.80
   7 -11   0  111.89   11.60
   7 -11   0  122.29   16.30
   7 -11   0   91.29   10.10
  -7  11   0  116.79   15.30
  -7  11   0  105.89   14.10
   7  11   0  103.59   11.80
   7  11   0  121.69   12.00
  -8 -11   0   46.30   15.80
   8 -11   0   17.90   11.00
   8 -11   0   22.50    8.10
   8 -11   0   48.60   12.70
   8  11   0   56.09   10.30
   8  11   0   42.80    9.40
  -8  11   0   18.60   10.90
  -8  11   0   45.00   11.90
   9 -11   0    2.70    7.10
  -9 -11   0   -4.30   13.40
   9 -11   0   10.20   10.60
   9 -11   0   17.80   12.30
  -9  11   0   33.00   12.50
   9  11   0   29.60   10.80
  -9  11   0   39.00   13.70
  10 -11   0   51.19   15.40
 -10 -11   0   26.90   16.40
  10 -11   0   32.10   13.60
  10 -11   0   15.10    8.30
 -10  11   0   33.30   15.50
  10  11   0   40.50   12.00
 -10  11   0   58.29   16.60
   0 -12   0  119.49   10.00
   0 -12   0  112.19    9.40
   0 -12   0  115.09   10.40
   0  12   0  112.39    8.60
   0  12   0  114.19   10.10
   0  12   0  130.49    9.50
   0  12   0  106.99    7.90
  -1 -12   0  792.12   27.20
  -1 -12   0  827.32   24.50
   1 -12   0  832.12   22.90
  -1 -12   0  804.62   25.90
   1 -12   0  827.82   24.20
   1 -12   0  824.02   27.40
   1  12   0  824.62   26.60
  -1  12   0  822.82   23.80
   1  12   0  815.82   22.30
  -1  12   0  826.82   24.90
  -1  12   0  791.62   25.70
   1  12   0  827.92   25.40
  -1  12   0  845.42   25.80
  -2 -12   0  463.15   21.40
   2 -12   0  506.45   21.30
   2 -12   0  488.95   18.40
  -2 -12   0  506.25   16.50
   2 -12   0  495.05   18.40
  -2 -12   0  495.45   18.40
   2 -12   0  517.55   19.60
  -2  12   0  484.85   19.00
  -2  12   0  502.15   18.20
   2  12   0  509.75   15.40
   2  12   0  498.05   19.50
  -2  12   0  517.75   17.30
   2  12   0  506.45   18.90
  -3 -12   0   20.60    3.90
   3 -12   0   16.90    7.30
  -3 -12   0    9.70    7.20
   3 -12   0   13.10    5.80
   3 -12   0   21.50    5.40
   3 -12   0   19.00    6.00
  -3  12   0   18.90    5.50
   3  12   0   24.90    4.30
  -3  12   0   11.60    5.50
   3  12   0   21.80    6.30
   3  12   0   17.20    5.40
   3  12   0   18.10    4.10
   4 -12   0  116.99   11.80
   4 -12   0  109.19    9.90
   4 -12   0  113.49   11.00
  -4 -12   0  119.19   15.00
   4 -12   0   81.69    8.90
   4 -12   0  106.39   13.90
   4  12   0  114.19    8.50
   4  12   0  104.19   10.20
   4  12   0  101.59   11.70
  -4  12   0  100.79   11.30
   4  12   0  108.49    9.10
  -4  12   0  107.99   10.70
  -5 -12   0   -8.10    8.10
   5 -12   0    1.10    6.00
   5 -12   0   -3.30    5.20
   5 -12   0    0.30    7.40
   5  12   0   -1.90    5.50
  -5  12   0    7.10    6.70
   5  12   0    3.90    4.40
  -5  12   0    4.10    6.50
   6 -12   0  -20.10    6.70
   6 -12   0   -2.20    7.80
   6 -12   0    9.80    5.70
  -6 -12   0    8.00   10.70
  -6  12   0    4.30    8.00
  -6  12   0    2.50    7.20
   6  12   0    9.40    6.70
   7 -12   0   25.30    8.20
   7 -12   0   34.40   11.40
   7 -12   0   26.70   10.60
   7 -12   0   23.30    7.10
  -7 -12   0   26.50   12.70
  -7  12   0   24.40    9.70
   7  12   0   18.10    8.30
  -7  12   0    5.60    8.70
   7  12   0   23.90    7.50
   8 -12   0   63.89   13.30
  -8 -12   0   77.59   18.30
   8 -12   0   50.69    9.10
   8 -12   0   54.59   13.70
  -8  12   0   50.59   12.80
  -8  12   0   47.50   13.60
   8  12   0   76.99   12.70
   9 -12   0   11.50   12.90
  -9 -12   0   -2.70   13.80
   9 -12   0    8.00    7.80
   9 -12   0   16.60   12.30
   9  12   0    7.70    9.60
  -9  12   0   23.60   13.80
  -9  12   0   18.70   12.70
  10 -12   0   86.09   17.30
  10 -12   0   64.49   10.50
 -10 -12   0   62.29   20.60
  10 -12   0   45.20   15.20
 -10  12   0   96.39   19.60
 -10  12   0   39.30   16.60
  10  12   0  111.79   16.10
   0 -13   0   12.80    5.10
   0 -13   0   -1.80    4.70
   0 -13   0    8.20    5.40
   0  13   0    3.40    4.00
   0  13   0   -2.90    3.90
   0  13   0    3.60    3.80
   0  13   0    0.70    4.40
  -1 -13   0   56.09    7.80
  -1 -13   0   68.09    7.80
  -1 -13   0   58.59    9.10
   1 -13   0   62.69    9.30
   1 -13   0   66.69    6.60
  -1  13   0   53.39    7.40
  -1  13   0   58.09    7.70
  -1  13   0   64.29    7.00
  -1  13   0   59.79    7.40
   1  13   0   58.89    7.80
   1  13   0   58.19    7.40
   1  13   0   56.39    5.90
   2 -13   0  446.66   17.40
   2 -13   0  426.86   17.30
   2 -13   0  432.46   18.40
   2 -13   0  392.76   19.20
  -2 -13   0  411.46   15.10
  -2 -13   0  442.96   17.50
  -2 -13   0  424.26   20.70
   2  13   0  433.06   13.90
   2  13   0  423.16   18.20
  -2  13   0  431.96   17.10
  -2  13   0  407.26   17.50
  -2  13   0  402.86   15.40
   2  13   0  432.96   17.70
  -3 -13   0  172.98   16.60
   3 -13   0  157.08   12.30
   3 -13   0  157.58   11.20
  -3 -13   0  145.49    8.20
   3 -13   0  140.09   11.60
   3 -13   0  129.79   14.40
   3  13   0  146.59    8.30
   3  13   0  150.58    8.30
  -3  13   0  130.09   10.00
  -3  13   0  147.99   12.30
   3  13   0  145.89   11.80
   3  13   0  147.49   11.60
   4 -13   0 1345.67   39.10
  -4 -13   0 1261.57   45.50
   4 -13   0 1245.78   43.40
   4 -13   0 1346.57   40.40
   4 -13   0 1312.37   37.70
   4  13   0 1319.07   34.60
   4  13   0 1263.67   40.60
   4  13   0 1267.27   34.10
  -4  13   0 1274.07   40.30
   4  13   0 1347.67   39.60
  -4  13   0 1282.37   37.70
   5 -13   0    3.30    7.20
   5 -13   0    1.10    5.80
   5 -13   0   -0.50    5.70
  -5 -13   0    4.00    9.70
   5  13   0   -1.40    4.20
   5  13   0   -2.50    5.90
  -5  13   0    4.70    6.50
  -5  13   0    9.60    7.20
   6 -13   0    9.90    6.80
  -6 -13   0    1.00   10.60
   6 -13   0   14.60    9.50
   6 -13   0   17.20    7.20
   6 -13   0    6.80    8.50
  -6  13   0   13.90    8.00
   6  13   0   13.70    7.40
  -6  13   0   15.60    8.70
   7 -13   0    2.00    6.80
   7 -13   0  -11.00    8.00
  -7 -13   0    5.50   10.90
   7 -13   0   -3.00    6.00
   7 -13   0    4.40    9.10
  -7  13   0   -8.60    8.30
   7  13   0   -3.20    7.00
  -7  13   0   15.00    9.50
   8 -13   0   26.70    8.00
   8 -13   0   27.70   11.80
  -8 -13   0   -3.40   12.50
   8 -13   0   11.20   11.30
  -8  13   0   20.00   11.50
   8  13   0   25.70   10.00
  -8  13   0   15.80   11.50
  -9 -13   0   64.89   19.10
   9 -13   0   37.60   10.40
   9 -13   0   43.80   14.90
   9 -13   0   34.00   15.00
  -9  13   0   30.30   14.20
  -9  13   0   41.60   14.70
   9  13   0   55.29   13.40
  10 -13   0   51.19   16.40
  10 -13   0   26.20   15.30
 -10 -13   0   -6.30   16.00
  10 -13   0   25.60    9.50
  10  13   0   69.79   15.10
 -10  13   0   31.60   16.20
   0 -14   0  207.68   12.80
   0 -14   0  245.78   13.80
   0 -14   0  234.88   13.60
   0  14   0  231.58   11.20
   0  14   0  236.78   12.20
   0  14   0  255.47   13.10
   0  14   0  239.68   13.70
  -1 -14   0  112.19   10.60
  -1 -14   0  127.09   10.20
   1 -14   0  128.79   12.40
   1 -14   0  115.79   10.60
  -1 -14   0  127.59   11.40
   1 -14   0  119.69    8.30
   1  14   0  125.49   10.90
  -1  14   0  106.29    9.40
  -1  14   0  139.59   10.70
  -1  14   0  121.89    8.70
  -1  14   0  135.19   10.30
   1  14   0  127.39   10.10
   1  14   0  114.49    7.60
  -2 -14   0  254.27   14.20
   2 -14   0  263.67   13.60
  -2 -14   0  273.47   17.30
   2 -14   0  248.48   15.00
  -2 -14   0  250.07   12.30
   2 -14   0  258.27   16.10
   2 -14   0  258.67   14.20
  -2  14   0  274.27   14.00
   2  14   0  270.47   15.10
  -2  14   0  252.27   12.10
   2  14   0  271.07   10.60
   2  14   0  286.27   14.60
  -2  14   0  225.58   13.60
  -3 -14   0  712.43   30.30
   3 -14   0  772.22   26.80
  -3 -14   0  707.63   21.20
   3 -14   0  698.13   29.50
  -3 -14   0  746.43   26.80
   3 -14   0  707.83   25.40
   3 -14   0  784.12   26.70
  -3  14   0  707.03   23.50
   3  14   0  727.73   21.20
  -3  14   0  696.33   26.20
   3  14   0  751.12   27.10
   3  14   0  750.22   26.90
   3  14   0  740.13   21.40
  -4 -14   0  135.99   17.00
   4 -14   0  153.48   12.60
   4 -14   0  151.78   13.70
  -4 -14   0  131.49    7.50
   4 -14   0  154.68   17.60
   4 -14   0  127.69   13.70
   4  14   0  154.48    9.90
   4  14   0  141.89    9.40
   4  14   0  138.69   14.20
  -4  14   0  141.19   13.90
  -4  14   0  153.98   12.10
   4  14   0  157.88   13.50
   5 -14   0  644.94   25.90
   5 -14   0  682.83   25.30
  -5 -14   0  653.13   32.90
   5 -14   0  676.63   28.30
  -5  14   0  651.23   25.70
   5  14   0  662.03   27.00
  -5  14   0  676.13   28.40
   5  14   0  671.73   21.80
   6 -14   0   79.39   10.50
   6 -14   0   85.49   13.80
  -6 -14   0   76.39   15.80
   6 -14   0   98.89   11.60
   6 -14   0   74.49   14.80
  -6  14   0   66.19   11.20
   6  14   0   73.59   11.70
  -6  14   0   81.09   12.80
  -7 -14   0    9.70   12.10
   7 -14   0   -7.40    6.30
   7 -14   0    2.20    7.30
   7 -14   0   22.30   10.40
   7 -14   0    7.80    9.80
  -7  14   0    4.80    8.50
  -7  14   0  -14.50    7.10
   7  14   0    5.40    7.80
   8 -14   0    3.10   11.00
   8 -14   0   22.30   12.00
   8 -14   0   12.80    8.10
  -8 -14   0   13.90   14.30
   8  14   0   19.00   10.20
  -8  14   0   21.40   10.80
  -8  14   0   14.20   11.20
   9 -14   0   14.20   13.10
  -9 -14   0   -5.70   12.90
   9 -14   0   18.60    8.90
   9 -14   0    6.40   12.70
  -9  14   0   -0.60   12.30
  -9  14   0   17.10   11.60
   9  14   0    2.60   11.20
  10 -14   0   -1.10   12.50
 -10 -14   0  -22.80   15.50
  10 -14   0   23.20   10.20
  10 -14   0    5.20   14.50
  10  14   0   20.90   13.60
 -10  14   0    0.90   13.70
   0 -15   0    6.70    5.30
   0 -15   0    9.70    5.60
   0 -15   0   -6.20    5.10
   0  15   0   -2.30    3.80
   0  15   0   -4.00    4.00
   0  15   0   -2.50    4.40
   0  15   0   -6.20    4.00
   1 -15   0   20.90    7.50
  -1 -15   0   25.30    7.00
   1 -15   0   22.80    7.50
   1 -15   0   31.00    6.00
   1 -15   0   28.80    6.90
  -1 -15   0   26.00    6.50
  -1 -15   0   20.80    7.30
   1  15   0   35.50    5.40
  -1  15   0   16.40    5.90
   1  15   0   22.20    6.20
  -1  15   0   36.60    6.90
  -1  15   0   29.70    6.60
   1  15   0   24.80    6.50
  -1  15   0   27.90    5.80
   2 -15   0   15.40    6.00
   2 -15   0    8.00    6.00
   2 -15   0    8.00    7.30
  -2 -15   0   18.30    6.20
   2 -15   0    3.50    3.40
   2 -15   0   10.40    7.00
  -2 -15   0   12.40    5.80
  -2 -15   0    2.90    7.50
  -2  15   0    3.10    6.00
  -2  15   0   11.70    5.10
   2  15   0    5.00    5.30
  -2  15   0   10.70    5.30
   2  15   0   14.50    4.50
  -2  15   0    8.00    5.90
   2  15   0   18.60    6.50
  -3 -15   0  152.48   17.30
   3 -15   0  173.88   14.30
  -3 -15   0  107.29    9.10
   3 -15   0  154.38   12.60
   3 -15   0  134.79   15.50
   3 -15   0  149.09   12.40
  -3  15   0  139.19   10.60
   3  15   0  131.19   13.20
   3  15   0  155.38    8.90
   3  15   0  133.29    8.30
   3  15   0  171.58   13.50
  -3  15   0  140.49   12.60
   4 -15   0   -6.90    8.60
  -4 -15   0    6.30    9.80
   4 -15   0    4.90    6.00
   4 -15   0    6.40    7.60
   4 -15   0    2.20    6.70
   4  15   0   -1.40    6.00
   4  15   0    5.60    7.50
   4  15   0    1.00    4.10
   4  15   0    6.80    4.70
  -4  15   0    7.90    7.30
  -4  15   0    2.40    6.30
   5 -15   0    2.60    8.40
   5 -15   0    1.80    7.10
   5 -15   0    3.10    6.90
  -5 -15   0    7.60    9.40
  -5  15   0    7.90    7.40
   5  15   0    2.70    6.70
  -5  15   0   -4.40    6.90
   5  15   0    4.00    5.00
   6 -15   0    5.50    6.80
   6 -15   0    3.10    8.80
  -6 -15   0   18.20   11.40
   6 -15   0    6.50    7.80
   6 -15   0   -9.00    8.10
   6  15   0   -9.10    7.00
  -6  15   0    3.40    8.50
  -6  15   0   -3.50    7.70
  -7 -15   0   -2.90   11.30
   7 -15   0    4.00    9.90
   7 -15   0   12.50   11.30
   7 -15   0   10.90    8.30
   7 -15   0    9.50    7.60
  -7  15   0   12.00    9.70
   7  15   0   23.50    9.60
  -7  15   0   -1.10    8.70
   8 -15   0    2.90   11.70
   8 -15   0   23.80    9.10
  -8 -15   0   15.10   15.70
   8 -15   0   28.80   13.40
   8  15   0   23.30   11.80
  -8  15   0   39.20   12.00
  -8  15   0   30.80   13.10
  -9 -15   0   26.50   18.00
   9 -15   0   42.40   14.80
   9 -15   0   25.20   13.50
   9 -15   0   48.90   11.40
  -9  15   0   77.69   17.20
   9  15   0   67.59   14.20
  10 -15   0  122.09   15.50
 -10 -15   0  162.08   27.60
  10 -15   0   84.79   19.50
  10 -15   0  137.19   22.60
  10  15   0  167.58   20.70
 -10  15   0  112.89   21.40
   0 -16   0   81.09   10.80
   0 -16   0   79.49    9.70
   0 -16   0   88.09   10.10
   0  16   0   64.49    8.70
   0  16   0   96.99    8.80
   0  16   0   86.29    9.00
   0  16   0   70.39    9.20
  -1 -16   0   72.99   10.00
   1 -16   0   70.59    8.10
  -1 -16   0   70.49   10.70
   1 -16   0   73.49   10.90
   1 -16   0   60.09    9.20
   1 -16   0   66.69   10.30
  -1 -16   0   82.19    9.80
  -1  16   0   67.49    8.70
   1  16   0   71.69    9.80
  -1  16   0   73.69    9.10
  -1  16   0   64.99    8.90
   1  16   0   78.09    7.40
   1  16   0   73.99    9.30
  -1  16   0   82.39    8.20
   2 -16   0   48.30    8.30
  -2 -16   0   43.90    8.20
  -2 -16   0   50.69   10.40
   2 -16   0   39.80    8.90
   2 -16   0   35.80    4.70
   2 -16   0   55.99   11.00
  -2 -16   0   56.49    8.20
  -2  16   0   46.10    8.70
  -2  16   0   38.50    7.00
  -2  16   0   47.30    8.20
   2  16   0   51.19    6.20
  -2  16   0   59.59    8.90
   2  16   0   48.80    8.50
   2  16   0   49.90    8.80
  -3 -16   0  632.14   20.60
   3 -16   0  615.54   25.90
   3 -16   0  652.33   24.50
   3 -16   0  651.53   25.20
   3 -16   0  633.44   29.50
  -3 -16   0  617.04   29.00
   3  16   0  606.84   25.50
   3  16   0  623.14   26.00
  -3  16   0  625.84   22.10
   3  16   0  625.04   19.80
  -3  16   0  638.34   25.50
   3  16   0  653.73   19.60
  -4 -16   0   20.20   11.00
   4 -16   0   12.90    8.30
   4 -16   0   22.30    7.70
   4 -16   0   17.70    8.20
   4 -16   0   17.10   10.40
   4  16   0   10.00    7.80
   4  16   0   -0.80    7.40
  -4  16   0   13.00    7.10
  -4  16   0   13.20    7.60
   4  16   0   19.30    5.10
   4  16   0   13.70    5.30
   5 -16   0  736.13   29.50
   5 -16   0  776.22   31.50
  -5 -16   0  749.33   36.20
   5 -16   0  758.02   28.40
  -5  16   0  744.43   27.70
   5  16   0  788.12   31.00
  -5  16   0  769.32   31.50
   6 -16   0   88.99   16.20
  -6 -16   0   96.49   18.00
   6 -16   0  107.39   15.60
   6 -16   0   87.29   12.00
   6 -16   0   78.69   11.80
   6  16   0  103.59   14.10
  -6  16   0   68.39   12.70
  -6  16   0   88.29   13.30
   7 -16   0    4.30   10.90
   7 -16   0   20.90   11.80
   7 -16   0   11.50    8.20
  -7 -16   0   -4.20   13.40
  -7  16   0   -0.50    9.90
   7  16   0   24.60   10.30
  -7  16   0   28.10   11.30
  -8 -16   0   -6.90   13.90
   8 -16   0   31.00   14.30
   8 -16   0   27.50   14.20
   8 -16   0   36.80   10.00
  -8  16   0   30.50   13.20
   8  16   0   45.80   13.00
  -8  16   0   29.80   12.50
   9 -16   0    7.60    9.00
   9 -16   0   16.00   15.10
  -9 -16   0    6.90   16.30
   9 -16   0   22.10   14.40
   9  16   0   22.50   13.00
  -9  16   0    7.30   13.30
   0 -17   0   -3.10    6.20
   0 -17   0    1.60    6.30
   0 -17   0   -2.10    6.10
   0  17   0    4.70    5.50
   0  17   0  -10.50    4.90
   0  17   0    6.70    5.00
   1 -17   0   12.40    8.40
  -1 -17   0    8.20    8.40
   1 -17   0   20.70    8.20
   1 -17   0    8.10    5.90
   1 -17   0   20.00    7.60
  -1 -17   0   28.60    7.80
  -1 -17   0   25.00    8.00
  -1  17   0   30.20    7.20
  -1  17   0   15.00    6.90
   1  17   0   18.00    4.90
   1  17   0   29.30    7.80
   1  17   0   15.40    6.70
  -1  17   0   21.30    6.00
  -1  17   0   18.40    6.80
   2 -17   0   13.00    4.10
  -2 -17   0   19.70    7.30
  -2 -17   0    7.60    6.20
   2 -17   0    6.70    8.10
   2 -17   0   11.20    8.20
  -2 -17   0   24.80    9.30
  -2  17   0   30.90    7.70
   2  17   0   17.30    7.40
  -2  17   0   16.30    7.00
  -2  17   0   12.80    6.10
   2  17   0   18.60    4.90
   2  17   0   17.50    7.10
   3 -17   0  251.87   16.60
  -3 -17   0  245.88   20.40
   3 -17   0  229.18   19.30
   3 -17   0  247.78   16.60
   3 -17   0  284.97   18.20
  -3 -17   0  245.78   13.10
   3  17   0  272.57   17.80
  -3  17   0  254.47   13.90
   3  17   0  235.68   11.60
   3  17   0  246.88   17.70
   3  17   0  268.47   11.50
  -3  17   0  280.47   16.80
   4 -17   0  234.38   17.90
  -4 -17   0  266.97   20.80
   4 -17   0  260.47   21.40
   4 -17   0  278.17   17.10
   4 -17   0  270.07   17.80
   4  17   0  248.28   18.30
  -4  17   0  262.07   17.80
  -4  17   0  269.57   14.80
   4  17   0  243.98   12.30
   4  17   0  263.47   18.80
   4  17   0  248.98   12.10
   5 -17   0  170.88   17.00
   5 -17   0  179.08   16.20
   5 -17   0  209.18   17.20
  -5 -17   0  193.88   21.80
  -5  17   0  166.08   17.00
   5  17   0  207.28   17.70
  -5  17   0  180.88   15.10
  -6 -17   0  287.47   28.70
   6 -17   0  285.47   20.00
   6 -17   0  336.47   23.10
   6 -17   0  267.87   24.60
   6 -17   0  314.47   19.20
   6  17   0  302.77   21.80
  -6  17   0  307.17   21.80
  -6  17   0  289.67   19.50
   7 -17   0   18.00   11.50
   7 -17   0   19.70   11.30
  -7 -17   0   27.30   15.90
   7 -17   0   23.00    9.30
  -7  17   0   -0.20    9.40
   7  17   0   24.30   11.00
  -7  17   0   10.00   11.00
   8 -17   0   16.80    9.30
   8 -17   0    0.90   11.80
  -8 -17   0  -12.00   13.90
   8 -17   0    8.60   12.50
   8  17   0    2.30   11.20
  -8  17   0   -5.60   10.10
   9 -17   0   -8.50   13.20
   9 -17   0    0.00   14.20
  -9 -17   0   10.30   17.30
   9 -17   0    4.90    9.00
  -9  17   0   -9.80   11.80
   9  17   0  -11.00   12.30
   0 -18   0  638.34   26.10
   0 -18   0  603.44   25.40
   0 -18   0  614.04   23.80
   0  18   0  591.44   24.00
   0  18   0  598.54   25.70
   0  18   0  635.24   21.60
   1 -18   0   67.19   11.40
   1 -18   0   53.19    9.70
  -1 -18   0   61.19   10.30
   1 -18   0   49.90   10.60
  -1 -18   0   66.99   10.40
  -1 -18   0   67.49   11.40
   1 -18   0   55.49    8.30
   1  18   0   56.79    7.50
   1  18   0   40.70    9.00
  -1  18   0   46.80    8.90
   1  18   0   46.20    8.70
  -1  18   0   61.99    8.60
  -1  18   0   66.39    9.60
  -1  18   0   61.39    9.00
  -2 -18   0   26.40   10.60
   2 -18   0   29.90   10.70
   2 -18   0   18.20    8.00
  -2 -18   0    9.10    7.00
   2 -18   0   18.60    9.20
   2  18   0   19.60    8.00
   2  18   0   30.90    5.80
  -2  18   0   18.20    7.90
  -2  18   0   10.60    7.40
   2  18   0   22.80    8.50
  -2  18   0   27.90    7.20
  -3 -18   0  140.49   10.90
   3 -18   0  140.49   14.20
   3 -18   0  102.99   15.50
  -3 -18   0  124.69   17.20
   3 -18   0  127.79   14.80
   3 -18   0  131.49   13.70
  -3  18   0  116.89   13.30
   3  18   0  125.49   14.40
   3  18   0  139.49   14.40
  -3  18   0  130.79   11.30
  -3  18   0  118.09   14.00
   3  18   0  120.79    9.30
   3  18   0  127.59    8.80
   4 -18   0   21.40    9.80
   4 -18   0   21.80   11.60
   4 -18   0   23.40    8.50
  -4 -18   0   14.10   11.10
   4 -18   0   15.70    8.70
  -4  18   0   34.80    9.50
  -4  18   0   17.10    7.50
   4  18   0   24.20    8.80
   4  18   0    0.70    8.00
   5 -18   0   -5.10    8.00
   5 -18   0   -1.10    7.30
  -5 -18   0    1.70   11.00
   5 -18   0    2.60    8.50
   5  18   0   -1.00    8.00
  -5  18   0    1.70    7.50
  -5  18   0   -5.80    7.50
   5  18   0   -0.60    8.40
  -6 -18   0  210.38   25.50
   6 -18   0  209.68   18.00
   6 -18   0  197.88   18.20
   6 -18   0  201.58   20.00
   6 -18   0  186.28   21.90
   6  18   0  203.48   19.70
  -6  18   0  188.58   16.90
  -6  18   0  213.38   20.90
  -7 -18   0    9.10   15.50
   7 -18   0    9.00   11.80
   7 -18   0    5.70    9.00
   7 -18   0    7.90   10.80
  -7  18   0   10.60   10.60
   7  18   0   19.10   11.00
  -7  18   0   14.00   11.10
   8 -18   0   27.20   14.10
   8 -18   0   12.40    9.40
   8 -18   0    0.30   12.30
  -8 -18   0   24.10   16.30
  -8  18   0   -1.80   11.00
   8  18   0    3.70   12.80
   9 -18   0   61.89   14.20
   9 -18   0  105.89   19.50
   9 -18   0   42.60   17.40
  -9 -18   0   56.79   23.30
  -9  18   0  110.89   18.90
   9  18   0  112.69   19.40
   0 -19   0   -3.00    7.40
   0 -19   0   -0.50    7.40
   0 -19   0   10.80    7.10
   0  19   0   -3.60    5.10
   0  19   0    1.50    6.60
   0  19   0    5.70    6.70
   1 -19   0  382.46   20.90
   1 -19   0  350.16   21.10
  -1 -19   0  333.47   20.30
  -1 -19   0  395.76   20.90
   1 -19   0  363.26   21.60
  -1 -19   0  352.86   18.90
   1 -19   0  331.67   15.90
  -1  19   0  342.57   18.70
   1  19   0  345.57   14.90
   1  19   0  361.86   18.70
   1  19   0  343.47   20.70
  -1  19   0  342.47   17.10
  -1  19   0  348.47   17.30
  -1  19   0  369.16   20.00
  -2 -19   0  546.85   22.20
   2 -19   0  580.24   25.80
   2 -19   0  545.75   26.20
   2 -19   0  575.74   28.30
  -2 -19   0  539.35   27.60
  -2  19   0  574.44   24.10
   2  19   0  562.04   26.40
   2  19   0  532.35   23.90
   2  19   0  535.45   18.70
  -2  19   0  547.95   24.10
  -2  19   0  608.04   22.00
  -3 -19   0  152.98   19.30
   3 -19   0  131.39   16.70
  -3 -19   0  169.88   12.20
   3 -19   0  154.38   16.00
   3  19   0  156.98   15.70
   3  19   0  116.09   14.00
  -3  19   0  162.38   15.40
   3  19   0  139.69   10.10
  -3  19   0  138.19   14.30
  -3  19   0  130.89   12.20
   4 -19   0   28.40    9.70
   4 -19   0   19.00    9.60
   4 -19   0   -2.30   10.40
  -4 -19   0    2.50   11.40
   4 -19   0   -7.60    7.50
  -4  19   0   20.70    7.60
  -4  19   0   18.20    8.50
   4  19   0   35.80   10.10
   4  19   0   16.20    8.80
   5 -19   0  215.48   19.60
   5 -19   0  252.47   20.00
   5 -19   0  257.77   18.30
  -5 -19   0  227.78   25.10
  -5  19   0  235.98   15.60
   5  19   0  242.38   20.70
  -5  19   0  231.88   18.90
   5  19   0  235.98   20.00
   6 -19   0  227.98   21.30
   6 -19   0  187.38   18.40
  -6 -19   0  165.58   24.00
   6 -19   0  174.18   21.80
   6 -19   0  166.48   16.80
   6  19   0  200.18   20.30
  -6  19   0  199.78   20.10
  -6  19   0  182.98   15.80
   7 -19   0   50.49   14.70
   7 -19   0   54.59   14.50
   7 -19   0   67.39   12.90
  -7 -19   0   48.50   19.40
   7  19   0   74.39   15.70
  -7  19   0   78.79   15.60
   8 -19   0   34.90   15.10
   8 -19   0    9.80   14.50
  -8 -19   0   38.10   18.00
   8 -19   0   18.80   10.70
  -8  19   0    8.30   12.70
   8  19   0    6.10   12.90
  -9 -19   0    2.20   20.60
   9 -19   0   12.60   15.40
   9 -19   0   10.60   14.90
   9 -19   0    1.40   11.60
  -9  19   0   13.20   14.60
   9  19   0   21.50   16.10
   0 -20   0   57.99    9.90
   0 -20   0   51.89   10.90
   0 -20   0   38.90    9.70
   0  20   0   39.90    9.50
   0  20   0   53.39    9.70
   0  20   0   62.59    8.60
  -1 -20   0    8.00    7.80
  -1 -20   0   12.10    8.00
   1 -20   0   12.60    8.50
   1 -20   0    1.60    7.50
  -1 -20   0    3.70    8.90
   1 -20   0   19.00    9.50
   1 -20   0    6.90    6.00
   1  20   0    6.20    5.00
  -1  20   0    3.80    6.40
   1  20   0   -0.40    7.10
  -1  20   0    3.70    6.20
  -1  20   0   -0.80    6.60
   1  20   0   17.00    7.30
   2 -20   0   63.49   11.00
  -2 -20   0   98.29   11.50
   2 -20   0   48.10   13.80
   2 -20   0   65.59   11.80
  -2 -20   0   50.99   12.60
   2  20   0   80.69    8.40
   2  20   0   60.59   11.50
  -2  20   0   76.39   11.20
  -2  20   0   75.89    9.40
  -2  20   0   84.09   11.70
   2  20   0   76.09   11.40
   3 -20   0   44.10   10.40
   3 -20   0   24.10   11.70
   3 -20   0   12.80    8.90
  -3 -20   0   25.40   12.50
  -3  20   0   41.90   10.00
   3  20   0   30.80   10.00
   3  20   0   26.10    9.40
  -3  20   0   22.10    7.90
  -3  20   0   27.70    8.80
  -4 -20   0  171.08   22.10
   4 -20   0  198.48   17.30
   4 -20   0  209.58   23.00
   4 -20   0  214.48   18.10
   4 -20   0  178.78   17.50
  -4  20   0  183.98   16.70
   4  20   0  184.98   18.30
  -4  20   0  187.48   18.30
   4  20   0  202.18   19.20
  -4  20   0  202.18   14.40
   5 -20   0   68.39   13.90
   5 -20   0   77.29   13.30
   5 -20   0   80.39   14.30
  -5 -20   0   61.09   16.70
  -5  20   0   97.19   12.40
   5  20   0   71.39   14.50
   5  20   0   94.19   14.90
  -5  20   0   71.99   12.90
   6 -20   0    2.00   11.40
   6 -20   0    6.70    9.00
  -6 -20   0   -2.20   12.30
   6 -20   0   -8.20    9.00
   6 -20   0  -17.00    9.90
  -6  20   0   12.10    9.80
   6  20   0   18.80   11.30
   7 -20   0   10.80   10.40
  -7 -20   0   33.60   16.60
   7 -20   0   46.90   15.90
   7 -20   0   43.30   15.10
  -7  20   0   32.20   12.90
   7  20   0   49.70   14.00
   8 -20   0   27.30   15.30
  -8 -20   0   20.70   18.10
   8 -20   0   33.20   12.60
   8 -20   0   33.70   15.90
  -8  20   0   58.79   16.30
   8  20   0   79.39   18.00
   0 -21   0    7.60    7.80
   0 -21   0   -2.00    8.50
   0 -21   0    5.90    8.10
   0  21   0   -4.50    5.40
   0  21   0   -1.80    7.30
   0  21   0   -0.30    6.70
   1 -21   0  445.76   23.80
   1 -21   0  425.76   23.50
  -1 -21   0  383.96   21.20
   1 -21   0  340.37   18.40
   1 -21   0  365.36   24.00
  -1 -21   0  352.26   22.00
   1  21   0  411.26   21.00
  -1  21   0  369.86   18.70
   1  21   0  402.16   16.40
  -1  21   0  346.87   19.90
  -1  21   0  417.16   19.00
   1  21   0  345.77   22.00
  -2 -21   0  194.48   19.80
  -2 -21   0  149.39   14.70
   2 -21   0  150.48   16.20
   2 -21   0  164.48   19.20
   2 -21   0  156.48   16.80
  -2  21   0  167.98   15.50
   2  21   0  165.78   11.50
   2  21   0  134.49   14.50
  -2  21   0  157.38   12.60
   2  21   0  172.58   17.90
  -2  21   0  142.09   14.80
   3 -21   0   10.80   11.10
   3 -21   0    0.20    8.80
  -3 -21   0    7.80   10.90
   3 -21   0   21.80    9.60
   3  21   0   13.90    8.50
   3  21   0   18.40   10.00
  -3  21   0   13.40    8.40
  -3  21   0   21.10    8.80
  -3  21   0   18.60    7.60
  -4 -21   0    8.10   11.30
   4 -21   0   15.70   11.80
   4 -21   0    3.30    9.20
   4  21   0    8.00    9.60
   4  21   0    8.50    8.50
  -4  21   0   22.40    9.30
  -4  21   0   -6.30    8.20
  -4  21   0   -0.10    7.40
   5 -21   0   -9.10    8.60
  -5 -21   0   13.10   14.80
   5 -21   0   -2.80   10.50
   5 -21   0    8.60   10.40
   5  21   0    0.30    9.30
  -5  21   0   23.80    9.10
  -5  21   0   -3.00    7.80
  -5  21   0   -0.90    9.00
   5  21   0   -7.80    9.90
  -6 -21   0   61.49   17.20
   6 -21   0   46.80   13.20
   6 -21   0   64.49   13.10
   6 -21   0   64.29   16.40
   6 -21   0   64.59   15.70
  -6  21   0   72.29   14.30
   6  21   0   68.49   15.70
   7 -21   0  248.58   25.50
  -7 -21   0  198.28   28.10
   7 -21   0  167.78   23.10
   7 -21   0  227.98   20.20
  -7  21   0  226.68   23.30
   7  21   0  238.78   25.50
   8 -21   0   26.80   15.80
  -8 -21   0   43.60   23.50
   8 -21   0   90.39   20.20
   8 -21   0   68.39   14.40
   8  21   0   60.59   17.50
  -8  21   0   95.59   18.30
   0 -22   0  176.08   17.80
   0 -22   0  166.88   15.60
   0 -22   0  216.18   19.30
   0 -22   0  222.18   18.70
   0  22   0  216.58   16.30
   0  22   0  215.48   13.80
  -1 -22   0   64.69   12.70
  -1 -22   0   19.60   10.40
   1 -22   0   42.80   12.00
   1 -22   0   55.99   11.60
   1 -22   0   20.10   12.00
  -1  22   0   29.90    9.10
   1  22   0   50.69   11.40
   1  22   0   46.20    7.70
  -1  22   0   35.10    9.30
   1  22   0   35.90    9.80
  -2 -22   0  173.28   16.20
   2 -22   0  174.58   19.80
   2 -22   0  146.09   16.60
   2 -22   0  155.08   17.10
  -2 -22   0  129.59   18.10
  -2  22   0  174.78   15.20
   2  22   0  160.08   17.70
  -2  22   0  158.78   14.00
   2  22   0  138.89   14.80
  -2  22   0  168.28   16.50
  -3 -22   0  124.89   18.60
   3 -22   0  126.19   18.60
   3 -22   0  108.19   15.30
   3 -22   0  119.99   15.90
  -3  22   0  131.09   13.00
   3  22   0  121.29   15.50
  -3  22   0  105.69   13.80
   3  22   0  147.59   18.00
  -3  22   0  127.69   15.10
  -4 -22   0   43.30   14.60
   4 -22   0   70.39   12.80
   4 -22   0   79.19   14.40
  -4  22   0   72.39   13.30
  -4  22   0   92.69   11.40
   4  22   0   90.29   14.70
  -4  22   0   59.99   12.30
   4  22   0   68.89   14.40
   5 -22   0   65.79   15.80
   5 -22   0   70.39   14.60
  -5 -22   0   75.99   17.80
   5 -22   0   87.39   16.00
   5  22   0   87.89   16.10
  -5  22   0   70.99   13.60
  -5  22   0   96.19   14.40
   5  22   0   68.69   14.60
   6 -22   0   11.90   11.40
   6 -22   0   22.40   11.70
   6 -22   0    2.70   12.60
   6 -22   0   23.80   13.00
  -6 -22   0   23.30   15.70
  -6  22   0   10.60   12.10
  -6  22   0   19.50   11.40
   6  22   0   29.10   13.40
   7 -22   0    1.50   13.80
  -7 -22   0    0.10   17.80
   7 -22   0    6.70   11.90
   7 -22   0   -0.70   12.90
  -7  22   0   -1.40   11.80
  -7  22   0    2.40   12.50
   7  22   0   -1.90   14.90
   8 -22   0   38.90   14.80
   8 -22   0   33.90   17.50
   8 -22   0   56.99   17.60
  -8 -22   0   18.70   19.90
  -8  22   0   40.40   15.90
   8  22   0   41.80   17.80
   0 -23   0  -13.80    8.00
   0 -23   0   -9.90    8.80
   0 -23   0   -8.60    9.80
   0  23   0    7.90    7.60
   0  23   0    4.50    6.70
   1 -23   0    8.30    9.30
  -1 -23   0    3.90    8.90
  -1 -23   0    1.70    9.80
   1 -23   0    5.10   10.60
   1 -23   0   -2.30    9.80
   1  23   0   17.60    5.70
  -1  23   0    6.90    8.30
   1  23   0   -4.70    7.30
  -1  23   0   -6.40    6.10
   1  23   0   -7.60    9.00
   2 -23   0  118.19   15.30
   2 -23   0   98.29   15.30
   2 -23   0   95.49   16.90
  -2 -23   0   85.59   15.50
  -2 -23   0  102.09   13.50
  -2  23   0   98.09   12.20
   2  23   0   84.49   14.30
   2  23   0   95.99   13.30
  -2  23   0   73.59   12.30
  -2  23   0   90.69   13.20
  -3 -23   0   21.40   14.70
   3 -23   0   70.19   16.10
   3 -23   0   43.10   12.70
   3 -23   0   35.70   12.30
  -3  23   0   32.70   10.90
   3  23   0   36.00   10.70
  -3  23   0   58.29   11.70
  -3  23   0   60.19   10.00
   3  23   0   26.40   12.10
  -4 -23   0   -3.20   13.40
   4 -23   0   -4.80    9.90
   4 -23   0   -1.20   10.20
  -4  23   0   15.20    9.70
   4  23   0   12.80   11.90
   4  23   0    7.80    9.10
  -4  23   0   15.70   10.30
   5 -23   0   12.40   12.40
   5 -23   0   17.70   12.60
  -5 -23   0    5.10   15.90
   5  23   0   19.90   11.60
  -5  23   0  -14.50   10.30
  -5  23   0   11.10   10.70
   5  23   0   15.70   12.30
   6 -23   0   75.69   16.70
   6 -23   0   58.99   14.50
  -6 -23   0   73.19   21.90
   6 -23   0   47.20   16.50
  -6  23   0   91.79   15.40
   6  23   0   54.59   16.50
  -6  23   0   50.79   12.80
   7 -23   0   16.80   15.10
  -7 -23   0   35.30   20.40
   7 -23   0   37.30   13.70
   7 -23   0   46.00   17.40
  -7  23   0   25.10   14.40
  -7  23   0   -3.00   11.60
   7  23   0   -5.10   16.30
   0 -24   0  531.15   28.70
   0 -24   0  528.85   27.90
   0  24   0  502.05   21.60
   0  24   0  472.75   24.60
  -1 -24   0   -2.10   10.00
   1 -24   0   -4.10   10.00
   1 -24   0    9.40   11.70
  -1 -24   0    2.00    9.90
   1 -24   0   -6.80    9.10
   1  24   0    1.30    7.80
   1  24   0    0.20   10.20
  -1  24   0    4.00    6.90
  -1  24   0   -2.90    7.50
   2 -24   0  127.59   17.20
   2 -24   0  127.39   16.60
  -2 -24   0  162.78   19.50
   2 -24   0  152.18   20.50
  -2  24   0  126.19   15.30
   2  24   0  165.08   19.30
  -2  24   0  158.78   14.90
   2  24   0  118.79   15.00
  -2  24   0  171.08   16.10
   3 -24   0   18.40   11.60
  -3 -24   0   -7.70   11.40
   3 -24   0   29.50   14.40
   3 -24   0   14.20   10.90
   3  24   0   36.50   13.20
   3  24   0   32.40   11.20
  -3  24   0   64.49   12.60
  -3  24   0   29.80    9.70
  -3  24   0   32.00   10.60
   4 -24   0    1.10   10.60
   4 -24   0    3.60   11.20
  -4 -24   0   -9.40   13.80
   4  24   0   13.80   11.80
  -4  24   0   -6.00    9.90
   4  24   0   15.20   10.50
  -4  24   0  -13.60    8.10
  -5 -24   0  -11.40   14.80
   5 -24   0   -1.60   13.00
   5 -24   0   11.60   11.20
   5 -24   0    5.80   12.40
  -5  24   0    2.10   10.00
   5  24   0   -4.80   10.40
   5  24   0    3.50   12.90
  -5  24   0  -11.90   10.60
   6 -24   0   79.09   19.20
   6 -24   0  103.99   17.00
  -6 -24   0   70.69   20.50
   6  24   0  133.49   20.80
  -6  24   0  111.39   17.80
  -6  24   0   83.39   17.10
   7 -24   0    8.90   16.00
  -7 -24   0   59.29   23.00
  -7  24   0   32.40   12.50
  -7  24   0   46.90   15.00
   7  24   0   12.80   17.60
   0 -25   0   17.10   11.10
   0 -25   0   -4.60   11.20
   0  25   0    2.50    6.90
   0  25   0   13.30    8.30
   1 -25   0   94.59   17.60
   1 -25   0   56.09   13.50
   1 -25   0  106.49   15.80
  -1 -25   0   95.99   15.70
  -1 -25   0  102.99   15.00
  -1  25   0   94.19   12.30
  -1  25   0   96.09   13.90
   1  25   0   96.49   14.20
   2 -25   0   43.70   13.50
  -2 -25   0    8.00   12.00
   2 -25   0    9.80   12.60
   2 -25   0    4.00   10.20
  -2  25   0    2.90    8.10
  -2  25   0   -5.70    8.30
  -2  25   0    2.40    8.70
   2  25   0    6.90    9.00
   2  25   0   19.40   10.90
  -3 -25   0   35.10   14.70
   3 -25   0   32.80   12.20
   3 -25   0   12.00   11.80
  -3  25   0   -3.80    8.70
  -3  25   0    8.10    9.70
   3  25   0   33.90   13.90
   3  25   0   35.30   11.80
   4 -25   0   17.50   13.40
   4 -25   0   23.20   13.00
  -4 -25   0   26.50   15.70
   4 -25   0   -6.00   10.60
   4  25   0   24.30   13.70
   4  25   0   13.90   11.30
  -4  25   0   35.80   11.60
  -4  25   0    2.90   10.40
   5 -25   0   -8.70   11.80
   5 -25   0   12.30   14.60
   5 -25   0  -10.80   12.80
  -5 -25   0   -7.90   15.90
  -5  25   0    6.20   10.70
   5  25   0    5.70   13.30
   5  25   0    4.90   11.70
  -5  25   0    4.00   12.80
  -6 -25   0   37.00   19.50
   6 -25   0   63.39   19.10
   6 -25   0   57.09   15.10
   6 -25   0   36.10   14.70
  -6  25   0   66.99   16.50
  -6  25   0   59.19   15.40
   6  25   0   42.00   18.20
  -7 -25   0   93.99   25.00
   7 -25   0   75.29   21.00
  -7  25   0   89.49   18.70
   7  25   0  101.49   22.00
  -7  25   0  128.99   20.80
   0 -26   0   51.89   14.00
   0 -26   0   32.70   11.90
   0  26   0   26.00   10.20
  -1 -26   0    1.20   11.70
  -1 -26   0    3.20   12.40
   1 -26   0   20.20   12.00
   1 -26   0   40.10   14.60
  -1 -26   0   42.50   12.80
  -1  26   0    5.00    8.70
   1  26   0    7.30    9.30
  -1  26   0   23.70    9.50
  -2 -26   0   37.50   14.60
   2 -26   0   53.09   15.10
   2 -26   0   39.60   14.00
   2 -26   0   44.80   13.20
  -2  26   0   21.20   10.90
  -2  26   0   18.80   10.30
   2  26   0   28.30   11.40
   3 -26   0   14.30   12.60
   3 -26   0    2.60   11.50
  -3 -26   0   24.30   15.30
   3  26   0    0.50   10.60
  -3  26   0   -0.70    9.70
   3  26   0    4.80   12.50
  -3  26   0   -3.30    9.50
  -4 -26   0   36.60   16.10
   4 -26   0   15.20   13.10
   4 -26   0   16.00   14.60
   4 -26   0   -5.80   12.30
   4  26   0   10.60   13.80
  -4  26   0   29.10   12.20
   4  26   0   17.40   11.60
  -4  26   0   25.00   11.60
   5 -26   0   79.09   17.90
  -5 -26   0   91.39   21.90
   5 -26   0  108.19   19.10
   5 -26   0  105.19   20.80
  -5  26   0   99.49   17.30
  -5  26   0  116.39   18.20
   5  26   0  131.19   20.10
   5  26   0  149.69   23.20
  -6 -26   0   -1.50   18.00
   6 -26   0   -3.60   14.00
   6 -26   0   11.40   15.40
   6 -26   0   -8.50   12.90
  -6  26   0    8.00   13.70
   6  26   0  -15.60   16.90
  -6  26   0   -0.50   11.40
   0 -27   0    7.00   10.60
   0  27   0    5.40    9.00
  -1 -27   0  237.08   24.20
   1 -27   0  240.28   23.90
   1  27   0  281.57   22.20
  -1  27   0  285.37   21.30
   2 -27   0    1.40   11.30
  -2 -27   0    6.30   13.00
   2 -27   0  -13.50   13.10
  -2  27   0    2.00    9.20
   2  27   0   11.30   10.00
  -2  27   0    5.60    9.00
   3 -27   0    4.80   12.50
  -3 -27   0   -1.90   13.70
   3 -27   0    9.30   12.60
   3 -27   0    9.30   12.70
   3  27   0    3.60   13.40
  -3  27   0   14.70   10.20
   3  27   0   -1.00   10.60
  -3  27   0   10.30   10.80
   4 -27   0  -27.70   14.00
   4 -27   0    1.20   12.60
  -4 -27   0   -2.00   15.50
   4 -27   0   16.40   12.90
  -4  27   0   14.60   11.60
   4  27   0   -4.60   13.90
  -4  27   0  -17.80    9.90
   4  27   0    2.80   11.60
   5 -27   0   -0.10   14.30
   5 -27   0   21.20   15.70
  -5 -27   0   52.59   19.80
   5 -27   0   15.00   14.60
  -5  27   0   15.40   12.70
  -5  27   0   24.90   14.00
   5  27   0   25.30   13.90
   5  27   0   18.80   17.10
  -6 -27   0   24.10   19.80
   6 -27   0    5.40   16.10
   6 -27   0  -18.00   15.50
   6 -27   0   -7.20   14.80
  -6  27   0    0.00   13.60
  -6  27   0    8.50   13.60
   6  27   0   -0.70   18.10
   0 -28   0   52.09   15.50
   0  28   0   79.09   13.80
   1 -28   0   -0.80   11.20
  -1 -28   0   -8.70   10.90
  -1  28   0   13.50   10.10
   1  28   0    7.30   10.40
   2 -28   0  107.09   17.60
  -2 -28   0   60.99   18.70
  -2 -28   0   90.09   18.60
  -2  28   0   97.69   14.80
  -2  28   0  114.09   16.50
   2  28   0  104.29   15.90
   3 -28   0  -11.50   14.50
   3 -28   0  -13.80   13.10
   3 -28   0    5.10   13.60
  -3 -28   0   19.30   16.40
   3  28   0   -5.90   11.20
  -3  28   0   -5.40   11.20
  -3  28   0   -6.90   10.60
   4 -28   0   -1.40   13.60
   4 -28   0   14.00   15.90
  -4 -28   0   16.80   16.70
   4 -28   0   29.60   14.50
   4  28   0    6.70   13.80
  -4  28   0    5.20   11.80
   4  28   0    4.10   11.30
  -4  28   0    0.50   11.80
   5 -28   0   17.70   14.70
   5 -28   0    3.80   16.70
  -5 -28   0    2.60   16.70
   5 -28   0   -9.80   15.10
  -5  28   0   12.70   12.50
   5  28   0   12.80   19.20
  -5  28   0    6.10   14.50
   5  28   0   11.90   14.80
   0 -29   0  -17.90   11.40
   0 -29   0   -8.90   12.20
   0  29   0   -7.40    9.00
  -1 -29   0   97.99   17.80
   1 -29   0   96.39   18.60
   1 -29   0  119.99   19.40
  -1  29   0  110.79   16.30
   1  29   0  109.09   17.20
   2 -29   0   73.39   16.80
   2 -29   0   15.10   16.60
  -2 -29   0   33.80   16.10
  -2  29   0   54.39   13.40
   2  29   0   51.29   13.50
  -3 -29   0   -8.70   15.40
   3 -29   0   -4.10   15.20
   3 -29   0  -19.30   12.40
  -3  29   0   17.70   12.90
   3  29   0  -17.40   10.70
  -3  29   0   -4.90   10.10
   4 -29   0   15.40   15.30
   4 -29   0   -5.40   15.10
   4 -29   0   15.00   16.20
  -4 -29   0   17.90   17.20
  -4  29   0   -7.50   12.50
   4  29   0    8.40   13.70
  -4  29   0    6.30   12.80
   0 -30   0   89.29   18.30
   0  30   0   35.60   12.90
   1 -30   0    1.40   12.90
  -1 -30   0   17.50   13.60
   1 -30   0  -23.60   15.00
   1  30   0    0.10   10.60
  -1  30   0  -20.60    8.70
   2 -30   0   98.19   21.10
  -2 -30   0   42.70   16.90
   2 -30   0   95.69   19.60
  -2  30   0  129.59   18.20
   2  30   0  112.89   18.60
   3 -30   0   83.09   20.60
  -3 -30   0   51.99   18.40
   3 -30   0   56.09   17.40
   3  30   0   56.09   15.90
  -3  30   0   50.09   14.40
  -4  30   0   -9.60   12.50
   0 -31   0  -10.60   13.50
   0  31   0   -0.90   10.90
   1 -31   0   63.99   17.60
  -1 -31   0   38.90   17.60
   1 -31   0   91.79   20.50
   1  31   0   60.79   14.60
  -1  31   0   38.00   13.70
   2 -31   0  -18.50   14.50
  -2 -31   0    5.70   15.10
   2 -31   0   -2.90   16.00
   2  31   0   13.00   13.20
  -2  31   0   23.60   13.20
   0  32   0   48.60   14.70
 -11   0   1   15.60   15.60
  11   0  -1   29.40    8.60
  11   0  -1   20.20   13.10
  10   0  -1   11.40   10.00
 -10   0   1   -6.30   11.80
 -10   0   1   20.90   13.70
  10   0  -1   -6.20    6.30
  -9   0   1  205.68   22.20
   9   0  -1  274.87   13.30
  -9   0   1  277.47   24.10
   9   0  -1  224.18   17.10
   9   0  -1  277.57   19.80
   8   0  -1   -1.50    6.20
   8   0  -1    0.20    4.00
   8   0  -1  -13.20    6.40
  -8   0   1   -3.40    9.40
  -8   0   1    1.30    8.50
   7   0  -1 2196.08   61.29
   7   0  -1 2277.87   60.79
  -7   0   1 2306.27   68.39
  -7   0   1 2200.38   64.59
   6   0  -1    2.50    5.50
   6   0  -1   -1.90    4.50
  -6   0   1    0.90    5.70
   6   0  -1    2.00    5.30
   5   0  -1   -4.90    3.70
   5   0  -1   -1.70    3.90
   5   0  -1    3.10    4.90
   5   0  -1    6.90    4.40
  -5   0   1   -1.50    4.80
   4   0  -1   -0.80    3.90
   4   0  -1   -0.90    4.20
   4   0  -1   -0.80    4.10
   4   0  -1    5.20    4.60
   3   0  -1  532.65   16.80
   3   0  -1  542.35   17.10
   3   0  -1  548.35   16.80
   3   0  -1  538.05   17.00
   2   0  -1   -0.90    2.30
   2   0  -1   -0.30    2.60
   2   0  -1   -1.10    2.30
   2   0  -1    1.60    2.40
   1   0  -1 5209.08  110.69
   1   0  -1 5088.69  110.09
   1   0  -1 5077.79  110.99
   1   0  -1 5028.80  111.19
   0   0   1    0.60    0.50
   0   0  -1    0.20    0.60
   0   0  -1    0.00    0.40
   0   0  -1    0.50    0.60
   0   0  -1   -0.20    0.50
   0   0  -1    0.20    0.40
   0   0   1    0.00    0.40
   0   0  -1   -0.50    0.30
  -1   0  -1 3397.66   79.39
  -1   0  -1 3610.64   78.99
   1   0   1 3672.23   78.89
  -1   0  -1 3480.85   77.79
   1   0   1 3703.43   77.79
   1   0   1 3552.94   77.99
   1   0   1 3583.94   78.79
  -2   0  -1   -2.00    2.50
   2   0   1   -2.50    1.80
   2   0   1    0.40    2.30
   2   0   1   -1.00    1.60
   2   0   1   -2.30    2.60
  -2   0  -1    2.50    3.30
   3   0   1   43.30    6.20
   3   0   1   40.50    4.00
   3   0   1   35.10    3.70
   3   0   1   44.10    5.50
  -3   0  -1   42.20    6.00
  -3   0  -1   55.99    7.70
   4   0   1   -1.10    2.90
  -4   0  -1    4.90    6.00
   4   0   1   -4.60    3.20
  -4   0  -1   12.50    5.10
   4   0   1   -1.30    3.80
  -5   0  -1  208.88   15.00
   5   0   1  207.88   11.40
   5   0   1  180.88   13.10
   5   0   1  201.48    9.20
  -5   0  -1  229.28   14.00
   5   0   1  199.18    9.70
   6   0   1   -3.70    4.80
  -6   0  -1    6.10    7.40
   6   0   1   -4.10    4.10
   6   0   1   -3.70    6.10
  -6   0  -1   -2.40    6.30
   6   0   1    2.40    3.40
   7   0   1  575.14   19.90
  -7   0  -1  500.65   28.20
  -7   0  -1  542.45   26.10
   7   0   1  542.35   19.00
   7   0   1  535.45   25.20
   7   0   1  535.65   22.00
   8   0   1   -1.00    5.60
  -8   0  -1   -3.30    8.40
  -8   0  -1   -1.00    9.60
   8   0   1   -4.30    5.40
   8   0   1   -2.30    7.90
   9   0   1   29.70    7.90
  -9   0  -1   25.70   12.10
   9   0   1   21.20   10.70
  -9   0  -1   21.60   10.90
  10   0   1   -3.40    7.40
  10   0   1    5.90   10.00
 -10   0  -1   11.70   12.10
 -10   0  -1    0.20   12.40
  11   0   1   18.20   13.00
  11   0   1   43.10   10.90
 -11   0  -1   18.20   16.40
  11  -1  -1   -0.80    7.80
  11  -1  -1   12.60   13.20
 -11  -1   1   -9.90   14.80
 -11  -1   1   -0.50   13.80
  11   1  -1    5.00    7.40
 -11   1   1   -3.90   13.80
  11   1  -1   18.10   12.60
  10  -1  -1   38.80   13.50
 -10  -1   1   35.00   14.90
 -10  -1   1   19.80   13.90
  10  -1  -1   25.60    7.50
  10   1  -1   16.30   11.00
 -10   1   1    0.60   11.00
 -10   1   1   18.90   12.80
  10   1  -1   16.20    7.30
   9  -1  -1   30.60   10.40
  -9  -1   1   34.90   11.40
   9  -1  -1   -3.10    8.30
   9  -1  -1   16.40    5.60
  -9  -1   1    8.10   11.90
  -9   1   1   13.30   10.80
   9   1  -1   23.00    5.70
   9   1  -1   17.00    8.90
  -9   1   1   19.50   11.70
   9   1  -1   19.90    9.00
  -8  -1   1   31.20   11.30
   8  -1  -1   27.90    5.60
   8  -1  -1   29.20    9.00
   8  -1  -1   23.70    9.20
  -8  -1   1   38.90   12.60
  -8   1   1   29.70   11.70
   8   1  -1   31.60    4.80
   8   1  -1   30.80    5.60
  -8   1   1   20.70   10.10
   8   1  -1   20.40    8.80
   8   1  -1   27.90    7.80
   7  -1  -1  175.28   13.20
   7  -1  -1  182.28   14.80
   7  -1  -1  168.28   15.80
  -7   1   1  212.68   17.10
  -7   1   1  178.28   18.90
   7   1  -1  271.77   16.00
   7   1  -1  276.07   16.70
   6  -1  -1   59.29    9.00
   6  -1  -1   79.89   10.50
   6  -1  -1   53.19    7.90
  -6  -1   1   50.29   10.00
   6   1  -1   58.99    8.30
   6   1  -1   73.19    9.40
  -6   1   1   59.59    9.80
  -5  -1   1   -1.50    5.20
   5  -1  -1    4.80    4.40
   5  -1  -1    0.20    4.40
   5  -1  -1    7.80    4.50
   5  -1  -1    5.60    4.90
   5   1  -1    6.60    4.90
  -5   1   1    9.00    5.80
   5   1  -1    0.30    4.40
   5   1  -1    1.30    4.30
   5   1  -1    3.30    3.90
   4  -1  -1   14.90    5.30
   4  -1  -1   14.60    4.90
   4  -1  -1   13.20    4.60
   4  -1  -1   13.70    5.10
   4   1  -1    9.00    4.60
   4   1  -1   15.80    5.20
   4   1  -1    5.10    4.70
   4   1  -1   14.40    4.80
   3  -1  -1  623.54   18.90
   3  -1  -1  651.83   18.60
   3  -1  -1  616.04   18.90
   3  -1  -1  632.04   19.50
   3   1  -1  616.24   18.60
   3   1  -1  627.94   19.10
   3   1  -1  653.93   18.50
   3   1  -1  628.84   19.00
   2  -1  -1  264.57   10.00
   2  -1  -1  267.57    9.40
   2  -1  -1  250.97    9.50
   2  -1  -1  252.57    8.90
   2   1  -1  261.67    9.30
   2   1  -1  254.97    9.60
   2   1  -1  272.27    8.80
   1  -1  -1  564.04   14.30
   1  -1  -1  605.34   15.40
   1  -1  -1  605.84   15.60
   1  -1  -1  582.94   14.80
   1   1  -1  603.24   15.30
   1   1  -1  589.24   14.90
   1   1  -1  566.44   13.90
   1   1  -1  636.04   15.60
   0  -1   1    1.20    0.50
   0  -1  -1    0.20    0.70
   0  -1  -1   -0.40    0.50
   0  -1  -1    0.00    0.50
   0  -1  -1   -0.10    0.50
   0  -1  -1   -0.30    0.50
   0  -1   1   -0.30    0.50
   0  -1   1    0.10    0.50
   0   1   1   -0.60    0.50
   0   1   1    0.60    0.40
   0   1   1   -0.10    0.50
   0   1  -1    0.20    0.50
   0   1  -1   -0.80    0.50
   0   1  -1   -0.20    0.40
   0   1  -1   -0.40    0.40
   0   1  -1    0.10    0.50
   0   1  -1    0.40    0.40
   1  -1   1  223.38    7.40
   1  -1   1  227.38    7.80
  -1  -1  -1  228.58    8.20
   1  -1   1  222.68    7.00
  -1  -1  -1  219.08    6.90
   1   1   1  214.38    7.10
  -1   1  -1  215.38    8.10
   1   1   1  220.88    7.40
   1   1   1  235.48    7.60
  -1   1  -1  212.18    6.70
  -1   1  -1  219.48    7.20
   2  -1   1   78.79    4.40
   2  -1   1   86.19    5.90
  -2  -1  -1   79.59    6.20
   2  -1   1   80.09    6.10
   2  -1   1   81.79    4.70
   2  -1   1   77.19    3.60
   2   1   1   88.69    4.70
   2   1   1   73.29    4.60
  -2   1  -1   82.89    5.40
   2   1   1   87.19    6.20
   2   1   1   86.99    4.70
  -2   1  -1   78.39    6.40
   2   1   1   80.19    6.00
   3  -1   1   12.70    4.40
   3  -1   1   10.40    2.70
   3  -1   1    7.70    2.50
   3  -1   1   15.00    3.00
  -3  -1  -1   12.10    4.60
   3   1   1    9.10    4.60
   3   1   1   11.10    2.70
  -3   1  -1    9.50    4.10
   3   1   1   16.40    3.20
  -3   1  -1   12.10    5.00
   4  -1   1  395.26   15.60
   4  -1   1  380.16   12.80
   4  -1   1  372.16   12.60
   4  -1   1  395.06   12.60
  -4  -1  -1  373.86   17.00
   4  -1   1  420.76   17.20
   4   1   1  383.26   12.90
  -4   1  -1  384.26   18.30
   4   1   1  383.76   12.70
  -4   1  -1  398.16   16.50
   4   1   1  412.76   14.50
   4   1   1  409.46   16.80
   5  -1   1  621.14   23.30
   5  -1   1  609.54   18.40
   5  -1   1  653.03   18.90
  -5  -1  -1  635.34   24.50
  -5  -1  -1  602.64   26.20
   5  -1   1  618.24   21.70
  -5   1  -1  664.33   23.90
   5   1   1  607.04   23.10
   5   1   1  618.54   18.90
  -5   1  -1  621.04   25.70
   5   1   1  611.84   18.50
   5   1   1  640.04   20.70
   6  -1   1   26.20    5.50
   6  -1   1   19.30    6.50
  -6  -1  -1   22.60    9.10
   6  -1   1   26.10    4.50
  -6  -1  -1   20.10    8.10
   6  -1   1   40.90    8.90
  -6   1  -1   36.50    8.50
   6   1   1   16.80    5.60
   6   1   1   12.00    4.90
   6   1   1   25.60    8.20
  -6   1  -1   69.59   11.10
   6   1   1   14.50    4.30
   7  -1   1  373.46   15.30
  -7  -1  -1  395.76   23.00
   7  -1   1  374.66   21.20
   7  -1   1  347.87   15.70
  -7  -1  -1  403.86   25.10
   7  -1   1  370.26   19.10
  -7   1  -1  376.16   21.10
   7   1   1  376.46   15.40
  -7   1  -1  380.96   24.40
   7   1   1  404.86   21.20
   7   1   1  389.36   18.00
   7   1   1  399.26   16.30
   8  -1   1   33.50    9.20
  -8  -1  -1   34.00   12.30
   8  -1   1   70.09   12.90
  -8  -1  -1   29.90   11.20
   8  -1   1   33.40    7.50
   8   1   1   32.00    8.50
  -8   1  -1   54.39   13.60
  -8   1  -1   45.40   11.60
   8   1   1   49.80   11.00
   8   1   1   45.10    7.80
  -9  -1  -1   14.90   11.40
   9  -1   1   17.60    8.90
   9  -1   1    1.70    9.30
   9  -1   1   20.90    7.30
  -9  -1  -1   17.90   12.00
   9   1   1   21.70   10.70
   9   1   1   25.10    8.00
  -9   1  -1   19.70   11.40
  -9   1  -1   43.20   14.30
 -10  -1  -1    5.50   13.00
  10  -1   1   14.90   11.70
 -10  -1  -1    7.40   13.20
  10  -1   1   16.90    8.30
  10   1   1   13.10   11.40
 -10   1  -1   -6.30   11.60
 -10   1  -1   15.80   12.50
  10   1   1    8.60    8.30
  11  -1   1  170.58   21.50
 -11  -1  -1  129.09   24.50
  11  -1   1  145.49   15.50
  11   1   1  168.18   16.20
 -11   1  -1  141.09   22.80
  11   1   1  157.88   22.10
  11  -2  -1   26.60    8.20
 -11  -2   1    6.70   15.60
 -11  -2   1   22.40   15.00
  11  -2  -1   54.69   15.10
  11   2  -1   47.10    9.40
  11   2  -1   40.60   13.80
 -11   2   1   31.10   16.00
 -10  -2   1   59.59   16.70
  10  -2  -1   69.09   14.50
  10  -2  -1   76.99    9.40
 -10  -2   1  104.09   18.90
 -10   2   1   64.89   16.40
  10   2  -1   78.99   14.30
  10   2  -1   71.49    9.70
  -9  -2   1   78.29   15.20
   9  -2  -1   82.59    8.10
   9  -2  -1   75.39   14.50
   9  -2  -1   85.59   13.50
  -9  -2   1  113.29   19.30
  -9   2   1   64.69   14.40
   9   2  -1  111.69    9.90
   9   2  -1   79.29   13.30
  -9   2   1  120.99   18.40
   8  -2  -1   54.69    5.90
   8  -2  -1   56.59    8.80
   8  -2  -1   51.89   11.00
   8  -2  -1   49.60    6.20
  -8  -2   1   47.70   12.20
   8  -2  -1   45.50   10.40
  -8   2   1   75.59   14.30
   8   2  -1   63.79    6.90
  -8   2   1   65.79   12.60
   8   2  -1   49.90    9.70
   8   2  -1   70.49   11.40
   8   2  -1   46.70    5.80
   7  -2  -1  890.81   29.30
   7  -2  -1  837.72   32.10
   7  -2  -1  876.61   31.50
  -7  -2   1  877.81   35.40
   7   2  -1  856.11   23.50
  -7   2   1  880.11   35.70
  -7   2   1  884.21   33.40
   7   2  -1  898.81   29.60
   7   2  -1  856.61   30.70
  -6  -2   1  217.38   16.30
   6  -2  -1  213.18   13.10
   6  -2  -1  236.18   15.30
   6  -2  -1  253.57   15.60
  -6   2   1  245.68   17.40
   6   2  -1  234.38   13.30
   6   2  -1  228.48   14.20
  -6   2   1  215.68   14.70
  -5  -2   1    7.40    6.20
   5  -2  -1    7.20    5.40
   5  -2  -1   13.50    4.70
   5  -2  -1    5.20    4.20
   5  -2  -1    5.90    5.00
  -5   2   1    1.00    5.80
   5   2  -1   13.10    5.50
   5   2  -1    3.80    4.50
  -5   2   1   11.30    5.70
   5   2  -1   18.30    5.40
   4  -2  -1   13.90    5.00
   4  -2  -1   10.30    4.50
   4  -2  -1   10.80    5.30
   4  -2  -1   10.50    5.30
   4   2  -1   19.30    5.00
   4   2  -1    6.40    4.50
   4   2  -1   13.80    5.00
   4   2  -1   11.10    4.50
   3  -2  -1  378.96   12.60
   3  -2  -1  363.56   13.80
   3  -2  -1  382.16   14.40
   3  -2  -1  360.96   13.30
   3   2  -1  367.76   13.40
   3   2  -1  385.56   12.70
   3   2  -1  381.46   14.10
   3   2  -1  381.36   12.80
   2  -2  -1 5259.07  114.09
   2  -2  -1 5057.09  113.09
   2  -2  -1 5101.79  113.09
   2  -2  -1 5182.18  111.89
   2   2  -1 5197.28  113.79
   2   2  -1 5154.58  111.59
   2   2  -1 5093.19  113.19
   2   2  -1 4899.01  111.99
   1  -2  -1  189.08    5.40
   1  -2  -1  178.58    5.10
   1  -2  -1  173.58    6.50
   1  -2  -1  185.88    7.40
   1  -2  -1  194.08    7.00
   1  -2  -1  179.08    5.60
   1   2  -1  187.18    7.10
   1   2  -1  190.08    5.60
  -1   2   1  188.38    6.50
   1   2  -1  188.58    6.20
   1  -2   1  825.82   20.30
  -1  -2  -1  771.62   19.30
  -1  -2  -1  790.32   21.00
   1  -2   1  781.62   19.40
   1  -2   1  798.52   19.40
   1  -2   1  793.12   20.20
  -1   2  -1  778.62   18.80
   1   2   1  795.72   19.60
  -1   2  -1  784.52   19.20
   1   2   1  788.82   19.50
   1   2   1  767.62   19.40
   1   2   1  804.42   19.60
  -1   2  -1  783.72   20.50
  -2  -2  -1   87.79    6.80
   2  -2   1  102.69    6.60
   2  -2   1   87.39    4.90
   2   2   1   89.19    6.20
   2   2   1   90.69    5.00
   2   2   1   98.79    6.20
  -2   2  -1  102.79    7.20
   2   2   1   89.39    4.20
  -2   2  -1   95.49    5.20
  -3  -2  -1   38.40    6.80
   3  -2   1   41.10    4.00
   3  -2   1   55.79    6.80
   3  -2   1   43.50    4.20
   3  -2   1   45.70    4.40
   3  -2   1   52.29    6.40
  -3   2  -1   42.80    5.70
   3   2   1   39.80    4.20
   3   2   1   52.29    6.50
   3   2   1   46.50    4.50
  -3   2  -1   44.60    7.00
   3   2   1   51.89    4.60
  -4  -2  -1  258.17   14.30
   4  -2   1  251.57   13.10
   4  -2   1  238.88    9.40
   4  -2   1  247.18   10.00
   4  -2   1  237.08    9.60
   4  -2   1  220.78   13.20
  -4   2  -1  225.18   14.40
   4   2   1  243.38   10.00
  -4   2  -1  232.08   12.40
   4   2   1  251.07   10.50
   4   2   1  233.88    9.70
   4   2   1  246.18   12.90
   5  -2   1   -0.90    4.70
   5  -2   1    2.30    3.10
   5  -2   1    4.90    3.80
   5  -2   1    6.70    5.80
   5  -2   1   -3.70    3.00
   5   2   1   20.20    4.60
  -5   2  -1    3.50    5.70
  -5   2  -1    0.80    4.80
   5   2   1   16.30    3.70
   5   2   1   17.60    4.40
   6  -2   1  642.54   23.80
  -6  -2  -1  614.54   27.10
   6  -2   1  598.04   19.20
   6  -2   1  657.13   25.70
   6  -2   1  599.14   19.70
   6   2   1  598.64   19.40
   6   2   1  596.94   20.10
  -6   2  -1  602.34   27.80
  -6   2  -1  587.64   24.10
   6   2   1  581.94   20.60
   6   2   1  612.24   24.40
   7  -2   1  290.57   14.20
   7  -2   1  272.27   13.20
   7  -2   1  274.47   17.70
  -7  -2  -1  332.27   22.10
  -7  -2  -1  329.37   23.60
   7  -2   1  287.07   19.00
   7   2   1  283.37   13.80
   7   2   1  302.27   18.90
   7   2   1  312.67   14.40
  -7   2  -1  290.37   21.50
   7   2   1  316.27   15.80
  -7   2  -1  260.67   18.70
   8  -2   1  180.18   18.60
  -8  -2  -1  161.28   20.90
   8  -2   1  159.18   12.20
   8  -2   1  159.38   14.60
  -8  -2  -1  150.58   18.50
   8   2   1  173.98   17.40
   8   2   1  129.69   12.70
  -8   2  -1  154.38   19.70
  -8   2  -1  155.38   17.10
   8   2   1  158.58   12.30
  -9  -2  -1   -6.20    9.80
   9  -2   1    6.00    9.90
   9  -2   1    9.30    7.00
  -9  -2  -1   -2.60   10.20
   9  -2   1    0.40    7.40
   9   2   1   -4.20    6.20
  -9   2  -1   -5.80   10.90
   9   2   1    9.90    9.20
  -9   2  -1   18.30   11.00
 -10  -2  -1   32.00   14.80
  10  -2   1   60.89   10.70
  10  -2   1   27.50   13.80
 -10  -2  -1   41.70   15.70
  10   2   1   55.99   10.50
  10   2   1   57.19   13.60
 -10   2  -1   54.29   16.70
 -11  -2  -1   31.20   17.00
  11  -2   1   33.80   14.20
 -11  -2  -1   62.49   18.00
  11  -2   1   15.90    9.40
  11   2   1   24.40   10.00
  11   2   1   -0.10   12.40
 -11   2  -1   23.40   15.70
 -11  -3   1   13.90   15.80
 -11  -3   1   61.09   17.90
  11  -3  -1   44.00   14.50
  11  -3  -1   26.20    8.80
  11   3  -1   44.70    9.60
  11   3  -1   42.60   13.90
 -11   3   1   22.50   16.40
 -11   3   1   37.20   16.30
  11   3  -1   44.30    9.60
 -10  -3   1  154.28   23.10
  10  -3  -1  133.09   17.40
  10  -3  -1  203.58   21.90
 -10  -3   1  170.28   23.30
  10   3  -1  136.99   18.20
 -10   3   1  160.38   22.80
  10   3  -1  170.98   13.10
  -9  -3   1   36.40   14.50
   9  -3  -1    9.90    9.60
   9  -3  -1   38.20    7.00
   9  -3  -1   60.19   12.60
  -9  -3   1   51.89   14.00
  -9   3   1   27.40   12.10
   9   3  -1   41.50    7.70
   9   3  -1   38.10   10.70
  -9   3   1   56.79   13.40
  -8  -3   1  275.07   22.30
   8  -3  -1  305.87   16.40
   8  -3  -1  264.77   12.00
   8  -3  -1  284.97   19.20
   8  -3  -1  329.87   20.20
   8  -3  -1  274.07   12.50
   8   3  -1  278.27   12.50
   8   3  -1  264.67   16.00
  -8   3   1  244.28   18.80
  -8   3   1  301.07   22.70
   8   3  -1  264.17   12.70
   8   3  -1  264.37   17.80
   7  -3  -1  370.36   12.80
   7  -3  -1  400.56   21.40
   7  -3  -1  372.26   20.90
  -7  -3   1  393.66   24.10
   7  -3  -1  354.96   17.80
   7   3  -1  402.06   14.00
   7   3  -1  393.76   13.70
   7   3  -1  388.16   19.40
  -7   3   1  380.66   20.70
   7   3  -1  420.36   18.20
  -7   3   1  398.56   23.20
   6  -3  -1  337.27   16.10
   6  -3  -1  336.27   17.70
   6  -3  -1  342.77   18.40
  -6  -3   1  376.36   20.60
   6  -3  -1  338.87   10.70
  -6   3   1  295.87   18.70
  -6   3   1  340.47   17.40
   6   3  -1  353.96   16.80
   6   3  -1  333.17   15.30
   5  -3  -1   32.70    5.50
   5  -3  -1   28.20    7.00
   5  -3  -1   25.70    5.70
  -5  -3   1   39.50    8.70
   5  -3  -1   20.90    6.40
  -5   3   1   33.50    7.60
   5   3  -1   23.70    6.40
   5   3  -1   22.80    5.60
   5   3  -1   25.70    5.40
  -5   3   1   34.80    6.90
   4  -3  -1    7.60    5.30
   4  -3  -1    5.90    5.00
   4  -3  -1    3.00    4.10
   4  -3  -1   16.70    4.40
   4   3  -1   14.30    5.40
  -4   3   1    5.60    5.20
   4   3  -1   15.80    4.40
   4   3  -1   12.00    4.50
   3  -3  -1   20.20    5.30
   3  -3  -1   20.00    3.70
   3  -3  -1   22.00    4.70
   3  -3  -1   29.20    5.40
   3   3  -1   23.40    4.00
   3   3  -1   22.60    3.90
   3   3  -1   14.20    4.60
  -3   3   1   21.10    4.90
   2  -3  -1 1435.56   35.50
   2  -3  -1 1377.56   34.10
   2  -3  -1 1340.07   34.30
   2  -3  -1 1399.56   32.50
   2  -3  -1 1387.66   31.00
   2   3  -1 1394.96   34.90
  -2   3   1 1406.46   35.00
   2   3  -1 1416.56   31.60
   2   3  -1 1395.26   31.60
  -2   3   1 1436.66   34.00
   2   3  -1 1399.66   32.20
   1  -3  -1    5.40    1.90
   1  -3  -1    4.70    2.10
   1  -3  -1    9.50    2.60
   1  -3  -1    6.30    3.00
   1  -3  -1    4.90    1.50
   1  -3  -1   12.50    2.90
  -1   3   1    8.40    1.80
   1   3  -1    5.20    2.40
   1   3  -1    4.40    2.10
   1   3  -1    7.10    1.90
  -1   3   1    5.80    2.30
   0  -3  -1 6122.69  133.39
   0  -3  -1 6099.19  133.39
   0  -3  -1 6166.48  133.09
   0  -3  -1 6290.97  133.79
   0  -3   1 6050.29  132.19
   0  -3   1 6165.08  133.09
   0   3   1 6280.37  133.59
   0   3  -1 6130.59  133.59
   0   3  -1 6116.19  133.39
   0   3  -1 6061.59  132.69
   0   3   1 6243.68  133.19
   0   3  -1 6121.19  132.79
   0   3   1 6198.88  132.89
   1  -3   1  495.25   14.10
   1  -3   1  524.25   14.80
   1  -3   1  488.15   13.50
  -1  -3  -1  481.95   13.60
   1  -3   1  490.65   13.70
  -1  -3  -1  481.05   15.20
   1   3   1  521.65   14.20
  -1   3  -1  508.25   11.60
   1   3   1  520.75   14.00
  -1   3  -1  507.45   14.50
  -1   3  -1  486.15   13.40
  -1   3  -1  494.45   14.40
  -1   3  -1  464.75   12.10
   1   3   1  512.05   13.50
  -2  -3  -1  102.09    7.50
   2  -3   1   97.69    5.60
   2  -3   1  108.79    7.00
   2  -3   1  109.69    4.70
   2  -3   1  102.39    6.60
   2   3   1  118.19    6.30
   2   3   1  106.69    5.60
  -2   3  -1  109.29    7.20
  -2   3  -1  103.39    5.20
   2   3   1   99.99    6.30
   3  -3   1   19.00    5.30
   3  -3   1   21.80    5.60
   3  -3   1   19.00    3.40
   3  -3   1   16.50    3.30
  -3  -3  -1   25.60    6.40
   3  -3   1   18.40    3.70
   3   3   1   20.90    3.20
   3   3   1   31.10    5.80
   3   3   1   15.40    3.60
   3   3   1   14.00    3.60
  -3   3  -1   18.50    5.50
  -3   3  -1   21.60    4.30
  -4  -3  -1   85.99   10.70
   4  -3   1   71.79    6.10
   4  -3   1   68.39    5.90
   4  -3   1   68.59    6.10
   4  -3   1   82.69    9.10
   4  -3   1   89.69    9.50
  -4   3  -1   63.59    9.40
   4   3   1   72.89    6.60
   4   3   1   74.19    6.40
   4   3   1   73.29    6.10
  -4   3  -1   90.99    8.40
   4   3   1   92.59    9.30
   5  -3   1   24.80    7.30
   5  -3   1    9.30    3.50
   5  -3   1   14.00    3.60
   5  -3   1   16.50    4.50
  -5  -3  -1   11.30    6.70
   5   3   1   19.50    4.30
   5   3   1   12.30    3.90
  -5   3  -1    8.70    5.80
   5   3   1   11.70    4.20
  -5   3  -1   10.10    4.80
   6  -3   1  199.38   11.40
   6  -3   1  192.68   10.40
   6  -3   1  193.28   14.40
  -6  -3  -1  260.37   18.40
   6  -3   1  192.78   10.30
   6  -3   1  210.08   15.70
   6   3   1  234.08   11.60
   6   3   1  234.78   15.20
   6   3   1  208.88   11.70
  -6   3  -1  203.48   14.30
   6   3   1  213.18   11.00
  -6   3  -1  218.28   17.00
   7  -3   1   94.39    9.00
   7  -3   1   85.89    8.40
   7  -3   1   77.89   12.00
  -7  -3  -1   96.89   16.40
   7  -3   1   79.49   11.10
  -7  -3  -1  117.19   16.50
   7   3   1  101.59   13.10
  -7   3  -1   73.19   11.60
   7   3   1   94.49    9.30
   7   3   1   84.49    8.70
   7   3   1   89.79    9.10
  -7   3  -1   74.79   14.00
  -8  -3  -1  317.07   22.90
   8  -3   1  327.67   16.10
   8  -3   1  321.17   19.80
  -8  -3  -1  318.37   25.80
   8  -3   1  319.57   21.60
   8   3   1  311.27   16.20
  -8   3  -1  333.07   25.00
   8   3   1  324.37   20.80
  -8   3  -1  345.67   20.90
   9  -3   1  135.59   16.20
   9  -3   1  134.59   17.20
  -9  -3  -1  137.49   20.00
  -9  -3  -1  110.89   19.30
   9  -3   1  116.49   11.90
  -9   3  -1  111.49   18.90
  -9   3  -1  113.29   15.90
   9   3   1  146.09   17.10
   9   3   1  147.09   13.20
 -10  -3  -1   21.80   14.50
 -10  -3  -1   29.40   14.80
  10  -3   1   42.50   14.00
  10  -3   1   18.60    8.50
 -10   3  -1    8.60   13.20
  10   3   1   17.20    8.80
  10   3   1   28.20   12.60
 -11  -3  -1    7.30   14.60
  11  -3   1  -14.80   12.70
 -11  -3  -1    7.00   15.10
  11  -3   1    8.60    9.20
 -11   3  -1   15.30   13.40
  11   3   1    2.30    9.60
  11   3   1    6.90   13.50
  11  -4  -1   -1.30    7.30
 -11  -4   1   -9.80   14.30
 -11  -4   1   14.10   14.30
  11  -4  -1   11.80   13.00
  11   4  -1    4.40    8.30
 -11   4   1   31.70   16.80
  11   4  -1   14.70   12.40
 -11   4   1   -2.80   12.50
 -10  -4   1   26.50   14.20
  10  -4  -1   -2.00    6.60
  10  -4  -1   -0.60   10.40
 -10  -4   1   18.90   13.90
  10  -4  -1    1.90    9.50
 -10   4   1    6.30   13.00
 -10   4   1   -3.60   11.40
  10   4  -1   11.90    6.90
  10   4  -1   12.00   10.90
   9  -4  -1   15.10    6.30
   9  -4  -1   21.60   10.30
  -9  -4   1   34.10   12.40
   9  -4  -1   33.20   11.60
   9   4  -1   24.00    9.50
   9   4  -1   19.70    6.70
  -9   4   1    6.40   11.30
  -9   4   1   25.80   13.50
   8  -4  -1    5.10    6.20
   8  -4  -1    6.50    8.90
   8  -4  -1    5.90    4.30
  -8  -4   1   20.60   10.40
   8  -4  -1   -1.90    5.00
   8  -4  -1    8.00    8.00
  -8   4   1   -2.40    8.90
   8   4  -1   17.50    6.70
   8   4  -1    4.00    6.60
   8   4  -1   17.60    5.40
  -8   4   1   10.70    8.00
   8   4  -1   13.10    5.10
   7  -4  -1   12.10    7.90
   7  -4  -1   23.60    8.50
   7  -4  -1    2.30    5.80
  -7  -4   1   31.20   11.30
   7  -4  -1   27.10    5.10
   7   4  -1   26.40    6.70
  -7   4   1   37.90    8.70
   7   4  -1   39.60    5.40
   7   4  -1   20.00    7.30
  -7   4   1   29.40   10.40
   7   4  -1   25.00    5.30
  -6  -4   1   17.70    8.40
   6  -4  -1   35.00    6.50
   6  -4  -1   24.30    8.00
   6  -4  -1   21.70    4.10
   6  -4  -1   18.30    7.80
   6   4  -1   23.40    4.10
  -6   4   1   31.30    7.50
   6   4  -1   32.20    7.00
   6   4  -1   37.10    6.30
  -6   4   1   24.30    8.10
   6   4  -1   21.30    4.20
   5  -4  -1   -3.10    4.90
   5  -4  -1    4.40    3.80
   5  -4  -1    0.40    5.40
  -5  -4   1  -12.40    4.90
   5  -4  -1   -5.60    3.80
  -5   4   1    3.00    5.20
   5   4  -1    2.60    4.50
  -5   4   1    5.50    4.80
   5   4  -1    1.70    2.60
   5   4  -1    3.20    2.60
   5   4  -1    2.90    4.70
   5   4  -1   -1.10    3.70
   4  -4  -1  426.36   17.30
   4  -4  -1  404.16   14.00
   4  -4  -1  409.06   16.00
   4  -4  -1  420.66   18.00
   4   4  -1  396.26   14.00
   4   4  -1  412.96   12.00
   4   4  -1  421.06   17.40
   4   4  -1  397.36   12.10
   4   4  -1  417.66   14.70
  -4   4   1  434.66   17.50
   3  -4  -1   88.49    8.20
   3  -4  -1   80.49    4.40
   3  -4  -1   81.69    4.70
   3  -4  -1   70.09    5.40
   3  -4  -1   88.59    8.80
  -3   4   1   87.19    8.40
   3   4  -1   81.79    5.00
  -3   4   1   87.49    7.80
   3   4  -1   81.49    5.10
   3   4  -1   92.49    6.40
   3   4  -1   87.59    8.20
   2  -4  -1  146.09    5.80
   2  -4  -1  147.49    5.60
   2  -4  -1  159.18    7.60
   2  -4  -1  153.78    5.60
   2  -4  -1  139.19    7.60
   2  -4  -1  151.78    8.60
  -2   4   1  158.08    8.00
  -2   4   1  152.38    6.80
   2   4  -1  153.48    6.10
   2   4  -1  148.99    7.90
   2   4  -1  156.28    6.10
   1  -4  -1  204.78    8.00
   1  -4  -1  200.08    5.80
   1  -4  -1  203.98    8.80
  -1  -4   1  204.28    7.10
   1  -4  -1  191.68    7.80
   1  -4  -1  196.48    6.50
   1  -4  -1  196.08    6.90
   1   4  -1  194.78    8.00
  -1   4   1  192.48    7.60
  -1   4   1  199.48    7.10
   1   4  -1  206.98    7.30
  -1   4   1  198.88    6.20
   1   4  -1  197.38    7.40
   1   4  -1  202.48    7.20
   0  -4   1  529.15   13.50
   0  -4  -1  552.84   14.70
   0  -4  -1  561.14   15.30
   0  -4   1  526.45   14.80
   0  -4   1  555.54   15.10
   0  -4  -1  554.94   15.10
   0  -4  -1  572.94   15.20
   0   4  -1  585.84   14.70
   0   4   1  564.34   14.60
   0   4  -1  544.45   14.10
   0   4  -1  545.35   15.10
   0   4   1  557.54   15.30
   0   4   1  541.85   14.50
   0   4  -1  537.45   14.80
   1  -4   1   73.89    5.10
   1  -4   1   86.49    5.30
  -1  -4  -1   69.59    6.40
  -1  -4  -1   78.69    5.30
   1  -4   1   96.39    6.50
  -1   4  -1   83.19    3.00
   1   4   1   83.39    5.30
  -1   4  -1   83.09    5.00
  -1   4  -1   80.09    5.60
  -1   4  -1   82.99    5.70
   1   4   1   83.49    4.70
   1   4   1   85.69    5.40
   2  -4   1  504.35   16.40
   2  -4   1  483.15   15.70
   2  -4   1  500.05   14.50
  -2  -4  -1  492.25   17.40
   2  -4   1  493.35   13.30
   2   4   1  494.35   14.80
  -2   4  -1  511.45   16.50
   2   4   1  498.55   14.80
   2   4   1  492.85   14.70
  -2   4  -1  483.55   16.50
  -2   4  -1  495.25   13.00
   3  -4   1    2.00    2.90
   3  -4   1    3.60    5.40
  -3  -4  -1   -0.40    5.30
   3  -4   1   -1.40    4.40
   3  -4   1   -2.80    3.50
   3  -4   1    0.40    3.10
   3   4   1   -5.10    3.20
   3   4   1   -1.80    4.10
   3   4   1    0.20    2.90
   3   4   1   -1.20    4.10
  -3   4  -1    4.40    4.70
  -3   4  -1    2.80    3.30
   4  -4   1 1084.19   28.50
   4  -4   1 1095.89   33.10
   4  -4   1 1083.79   28.00
  -4  -4  -1 1105.69   35.30
   4  -4   1 1098.99   28.40
   4  -4   1 1097.89   32.60
   4   4   1 1086.49   28.80
   4   4   1 1088.89   28.90
  -4   4  -1 1111.59   34.30
  -4   4  -1 1079.89   29.80
   4   4   1 1091.79   31.30
   4   4   1 1070.19   26.90
   5  -4   1  104.29    7.50
  -5  -4  -1  109.29   13.00
   5  -4   1  109.79   11.60
   5  -4   1  111.79    8.10
   5  -4   1  101.89    7.30
  -5   4  -1  116.69   12.50
   5   4   1  104.89    7.10
  -5   4  -1  110.79   10.20
   5   4   1  122.09   11.50
   5   4   1  112.19    8.20
   5   4   1  117.09    8.00
   6  -4   1  364.56   14.50
   6  -4   1  384.86   15.20
   6  -4   1  350.46   19.70
   6  -4   1  350.36   14.20
   6  -4   1  353.66   19.00
  -6  -4  -1  392.26   22.00
   6   4   1  358.86   15.30
   6   4   1  363.66   14.30
  -6   4  -1  337.67   17.10
  -6   4  -1  330.07   20.80
   6   4   1  381.96   14.90
   6   4   1  384.56   18.80
   7  -4   1   80.39   12.50
   7  -4   1   78.49   12.20
  -7  -4  -1   81.59   14.40
   7  -4   1   77.79    8.60
   7  -4   1   64.79    7.70
   7  -4   1   60.09    6.90
  -7   4  -1   63.39   13.10
   7   4   1   66.99    7.70
   7   4   1   72.29   11.60
  -7   4  -1   95.39   12.10
   7   4   1   70.99    8.50
  -8  -4  -1   94.39   16.80
   8  -4   1   56.19   12.00
   8  -4   1   76.09    9.60
   8  -4   1   70.29   12.30
  -8  -4  -1   74.39   14.90
  -8   4  -1   78.69   15.40
  -8   4  -1   70.19   12.50
   8   4   1   84.79   10.00
   8   4   1   85.39   13.20
  -9  -4  -1   20.30   13.00
   9  -4   1   37.00    8.70
   9  -4   1   42.60   10.70
  -9  -4  -1   25.80   13.70
   9  -4   1   58.19   13.40
   9   4   1   44.20   11.70
   9   4   1   40.50    8.80
  -9   4  -1   35.60   13.60
  10  -4   1   -6.70    7.40
 -10  -4  -1   27.50   14.30
  10  -4   1  -12.40   10.20
 -10  -4  -1   10.60   13.30
 -10   4  -1   18.60   13.20
  10   4   1    3.40    8.60
  10   4   1    2.50    9.80
 -11  -4  -1   13.80   15.10
 -11  -4  -1    7.10   14.00
  11  -4   1   -2.10    9.10
  11  -4   1   23.60   15.70
 -11   4  -1   -0.40   16.20
  11   4   1  -12.20   12.70
 -11   4  -1   12.20   14.30
  11   4   1   -4.60    9.60
  11  -5  -1    4.00   12.70
 -11  -5   1    6.60   15.60
  11  -5  -1   12.40    8.20
 -11  -5   1    1.10   14.80
 -11   5   1   28.90   17.40
 -11   5   1   35.40   13.90
  11   5  -1   10.70    8.70
  10  -5  -1   90.19   16.50
 -10  -5   1   81.49   18.10
 -10  -5   1   87.19   18.60
  10  -5  -1   92.49    9.50
  10  -5  -1  110.19   17.80
  10   5  -1  107.19   15.50
 -10   5   1   95.69   18.50
 -10   5   1   59.69   15.60
  10   5  -1   96.49   11.30
   9  -5  -1    4.00    5.90
   9  -5  -1   18.70   10.00
   9  -5  -1   10.50    9.80
  -9  -5   1   29.00   11.90
  -9   5   1   17.10   11.80
  -9   5   1   16.90   11.90
   9   5  -1   33.50    7.20
   9   5  -1   14.00    9.20
   8  -5  -1  181.98   17.70
   8  -5  -1  172.08   17.30
   8  -5  -1  158.18   10.40
   8  -5  -1  172.98   13.70
  -8  -5   1  112.59   17.80
  -8   5   1  174.78   19.20
   8   5  -1  166.98   15.20
   8   5  -1  147.59   11.10
  -8   5   1  174.68   16.90
  -8   5   1  153.98   18.00
   7  -5  -1   85.79    8.00
   7  -5  -1   81.79    7.30
   7  -5  -1   59.79   11.50
   7  -5  -1   78.99   10.20
  -7  -5   1  113.99   17.20
   7  -5  -1   74.29   12.10
   7   5  -1   82.09    7.50
   7   5  -1   88.89   10.80
  -7   5   1   72.49   12.80
  -7   5   1   83.19   11.40
   7   5  -1   90.39    8.00
  -6  -5   1  227.08   17.70
   6  -5  -1  196.78   15.50
   6  -5  -1  211.78   15.50
   6  -5  -1  219.88   13.50
   6  -5  -1  207.48    9.70
   6  -5  -1  209.78    9.00
  -6   5   1  248.08   16.50
   6   5  -1  214.38   10.20
  -6   5   1  223.18   13.50
   6   5  -1  202.68   12.60
   6   5  -1  212.58   10.00
   5  -5  -1  313.77   10.60
   5  -5  -1  325.67   17.30
   5  -5  -1  338.17   15.00
   5  -5  -1  329.87   11.10
   5  -5  -1  331.17   16.60
  -5  -5   1  329.47   19.10
  -5   5   1  313.47   17.30
   5   5  -1  316.77   13.90
  -5   5   1  332.07   16.80
  -5   5   1  297.87   14.10
   5   5  -1  316.97   11.40
   5   5  -1  320.77   11.40
   5   5  -1  324.87   16.40
   4  -5  -1   11.20    4.70
   4  -5  -1   13.00    3.40
   4  -5  -1   20.40    6.50
   4  -5  -1   15.20    5.60
   4  -5  -1   15.70    3.80
   4  -5  -1   10.30    2.70
   4   5  -1   14.20    3.20
  -4   5   1   23.40    6.20
   4   5  -1   10.50    5.30
  -4   5   1   11.20    5.10
   4   5  -1   12.90    4.10
   4   5  -1    9.50    3.40
   3  -5  -1 4392.76  100.79
   3  -5  -1 4360.06   97.79
   3  -5  -1 4362.76   97.59
   3  -5  -1 4515.55   97.59
   3  -5  -1 4393.36  101.89
   3  -5  -1 4541.65  103.39
   3   5  -1 4491.95   98.39
  -3   5   1 4383.86  101.19
   3   5  -1 4428.16  102.59
  -3   5   1 4523.85  102.99
   3   5  -1 4439.86   98.29
   3   5  -1 4454.95   98.19
   2  -5  -1 1840.62   41.80
   2  -5  -1 1868.11   45.00
   2  -5  -1 1863.71   42.90
   2  -5  -1 1820.12   43.10
   2  -5  -1 1848.52   45.30
   2  -5  -1 1891.41   46.60
   2   5  -1 1872.11   45.90
  -2   5   1 1916.71   43.90
   2   5  -1 1879.51   44.90
   2   5  -1 1874.01   43.60
  -2   5   1 1875.11   45.60
   2   5  -1 1898.01   42.00
   1  -5  -1   36.10    3.20
   1  -5  -1   30.10    4.60
  -1  -5   1   31.80    3.50
   1  -5  -1   28.00    3.40
   1  -5  -1   27.60    3.70
   1  -5  -1   27.70    3.50
   1  -5  -1   37.00    4.40
   1   5  -1   30.30    4.00
  -1   5   1   29.90    2.80
   1   5  -1   30.10    3.60
  -1   5   1   31.40    3.80
   1   5  -1   35.50    3.70
  -1   5   1   34.50    3.60
   0  -5   1  856.91   22.00
   0  -5  -1  810.22   21.40
   0  -5   1  844.62   20.10
   0  -5   1  868.51   21.60
   0  -5  -1  834.22   21.70
   0  -5  -1  868.51   22.20
   0   5  -1  845.32   20.70
   0   5   1  853.01   22.10
   0   5  -1  763.92   21.30
   0   5  -1  864.11   22.10
   0   5   1  864.91   21.40
   0   5  -1  847.22   21.30
   0   5   1  846.82   21.20
   1  -5   1  118.49    6.20
   1  -5   1  130.39    7.40
   1  -5   1  122.19    6.30
  -1  -5  -1  117.99    6.30
  -1  -5  -1  124.29    7.80
  -1   5  -1  118.29    6.60
  -1   5  -1  113.49    3.90
   1   5   1  114.69    6.50
   1   5   1  113.89    5.60
   1   5   1  114.09    6.10
  -1   5  -1  123.99    6.20
  -1   5  -1  113.59    6.40
  -2  -5  -1   82.79    8.20
   2  -5   1   72.79    5.60
   2  -5   1   64.99    5.50
   2  -5   1   75.19    5.10
   2  -5   1   71.39    7.10
   2  -5   1   68.79    6.40
  -2   5  -1   67.29    6.10
  -2   5  -1   72.79    3.60
   2   5   1   66.69    5.60
  -2   5  -1   67.49    6.90
   2   5   1   67.89    6.40
   2   5   1   69.49    5.40
   2   5   1   68.89    5.40
   2   5   1   66.99    5.60
   3  -5   1 1097.49   31.40
   3  -5   1 1059.59   27.70
  -3  -5  -1 1107.79   34.10
   3  -5   1 1112.59   28.70
   3  -5   1 1145.29   32.60
   3   5   1 1115.29   29.90
  -3   5  -1 1082.79   32.00
  -3   5  -1 1070.19   32.50
  -3   5  -1 1123.19   27.40
   3   5   1 1108.09   29.30
   3   5   1 1149.98   30.10
   4  -5   1   -1.30    5.60
   4  -5   1    6.60    5.30
  -4  -5  -1   -6.50    5.50
   4  -5   1    4.20    3.40
   4  -5   1    3.80    3.40
   4  -5   1   -0.50    3.80
   4   5   1    2.50    4.20
  -4   5  -1   -0.40    4.50
  -4   5  -1   -1.80    3.40
   4   5   1    0.60    3.30
   4   5   1    3.60    3.30
   5  -5   1  146.39    8.90
   5  -5   1  150.38   13.30
   5  -5   1  146.39   12.60
   5  -5   1  139.29    8.60
  -5  -5  -1  158.18   13.90
   5  -5   1  142.19    9.20
   5   5   1  155.68   11.50
   5   5   1  146.19    9.50
   5   5   1  152.68    9.50
   5   5   1  135.39    7.20
  -5   5  -1  152.38   13.00
  -5   5  -1  153.58    9.90
   6  -5   1   61.59    7.80
  -6  -5  -1   75.89   13.10
   6  -5   1   64.09    7.10
   6  -5   1   76.09   11.40
   6  -5   1   59.79    7.30
   6  -5   1   57.59   10.60
   6   5   1   78.79    8.20
   6   5   1   67.89    6.30
  -6   5  -1   79.59    9.50
  -6   5  -1   80.19   11.90
   6   5   1   60.59    7.50
   7  -5   1   96.99    8.80
  -7  -5  -1  131.29   17.40
   7  -5   1  112.09   10.30
   7  -5   1  100.39   13.40
   7  -5   1   99.69   13.10
   7   5   1  106.19   10.40
  -7   5  -1  104.39   15.20
  -7   5  -1  124.79   13.10
   7   5   1  111.49   13.20
  -8  -5  -1   45.60   14.00
   8  -5   1   58.89    8.30
   8  -5   1   39.30   10.70
   8  -5   1   70.29   13.40
  -8  -5  -1   75.09   17.30
   8   5   1   82.29   12.60
   8   5   1   73.89   10.30
  -8   5  -1   75.19   14.50
  -8   5  -1   76.49   12.50
  -9  -5  -1   20.20   14.70
   9  -5   1   28.80   12.10
   9  -5   1    8.30    7.20
  -9  -5  -1    4.00   12.40
   9  -5   1    4.80    9.30
  -9   5  -1   21.90   11.90
   9   5   1   15.00    9.80
   9   5   1   31.50    8.50
  10  -5   1  -12.50    7.50
 -10  -5  -1  -13.10   12.10
 -10  -5  -1    5.90   12.30
  10  -5   1   13.10   11.80
  10  -5   1    6.60    9.80
 -10   5  -1   18.00   12.60
 -10   5  -1    2.00   14.00
  10   5   1   -2.30    8.10
  10   5   1    4.70   10.20
 -11  -5  -1   70.99   20.30
  11  -5   1   67.29   17.90
  11  -5   1   76.69   12.20
 -11  -5  -1   76.39   20.90
  11   5   1   64.09   16.50
 -11   5  -1   97.29   21.50
 -11   5  -1   42.20   18.30
  11   5   1   76.49   13.60
 -11  -6   1   23.40   16.10
  11  -6  -1   48.30   16.20
  11  -6  -1    5.30    8.30
 -11  -6   1   16.20   16.50
 -11   6   1   10.20   15.30
 -11   6   1   12.90   16.50
  11   6  -1   39.50   10.70
  10  -6  -1   51.59   14.20
  10  -6  -1   58.59    9.30
 -10  -6   1   82.09   18.60
  10  -6  -1   75.19   15.60
 -10  -6   1   84.69   19.70
  10   6  -1   53.79   12.50
  10   6  -1   68.99   10.70
 -10   6   1   33.90   14.40
 -10   6   1   65.49   15.10
  -9  -6   1   86.49   17.40
   9  -6  -1   55.49   12.70
   9  -6  -1   46.30    7.60
   9  -6  -1   63.49   13.10
  -9   6   1   74.39   15.20
   9   6  -1   42.00   10.50
   9   6  -1   73.59    9.50
  -9   6   1   71.29   14.80
   8  -6  -1   16.10    6.90
   8  -6  -1   24.20   10.50
   8  -6  -1   22.70    5.70
   8  -6  -1   30.80   10.10
  -8  -6   1   22.70   12.10
  -8   6   1   12.40    9.00
  -8   6   1   34.50   11.10
   8   6  -1   32.50    9.20
  -8   6   1   12.60    9.10
   8   6  -1   21.90    6.30
   7  -6  -1  217.98   14.20
   7  -6  -1  199.28   17.70
  -7  -6   1  220.88   21.90
   7  -6  -1  220.48   10.80
   7  -6  -1  212.88   17.60
   7  -6  -1  212.78   11.20
   7   6  -1  219.48   11.70
   7   6  -1  207.38   14.10
  -7   6   1  229.28   18.70
  -7   6   1  209.48   15.00
  -7   6   1  229.98   18.00
   7   6  -1  203.08   11.60
   6  -6  -1   69.09    6.20
  -6  -6   1   72.39   12.60
   6  -6  -1   71.99   11.40
   6  -6  -1   70.69    6.80
   6  -6  -1   71.59    9.20
   6  -6  -1   77.79   11.80
   6   6  -1   72.69    7.20
  -6   6   1   75.29    9.40
   6   6  -1   66.19    6.80
  -6   6   1   68.39   10.70
  -6   6   1   71.39   11.40
   6   6  -1   67.19    8.50
   5  -6  -1    6.90    5.10
  -5  -6   1   19.90    8.30
   5  -6  -1   11.70    6.70
   5  -6  -1   13.40    6.60
   5  -6  -1   10.70    3.80
   5  -6  -1   12.30    3.20
  -5   6   1   12.20    6.10
   5   6  -1   11.20    3.60
   5   6  -1    9.50    4.60
   5   6  -1   16.30    3.90
  -5   6   1   17.60    4.90
  -5   6   1   13.40    6.20
   4  -6  -1   93.89   10.30
   4  -6  -1   83.59    5.80
   4  -6  -1  104.89   10.20
   4  -6  -1   87.59    6.40
   4  -6  -1   90.29    5.90
  -4  -6   1   95.49   12.10
   4   6  -1   94.09    6.70
  -4   6   1   99.09    9.50
   4   6  -1   94.69    6.40
   4   6  -1   83.59    7.10
   4   6  -1   86.19    9.50
  -4   6   1   85.79    9.80
   3  -6  -1  593.54   20.60
   3  -6  -1  596.84   22.00
   3  -6  -1  616.14   17.30
   3  -6  -1  598.14   16.10
   3  -6  -1  588.04   17.20
   3  -6  -1  610.34   19.80
   3   6  -1  650.13   21.20
  -3   6   1  619.54   19.60
   3   6  -1  641.14   18.10
  -3   6   1  606.84   21.10
   3   6  -1  615.54   17.70
   2  -6  -1    3.50    2.40
   2  -6  -1    3.30    3.30
   2  -6  -1    3.70    3.40
  -2   6   1    3.90    2.60
   2   6  -1    1.80    2.50
   2   6  -1    2.80    3.10
   2   6  -1    4.00    1.90
   2   6  -1    8.50    3.60
  -2   6   1    6.10    3.20
  -1  -6   1 1094.79   27.30
   1  -6  -1 1087.79   27.30
   1  -6  -1 1061.29   29.00
   1  -6  -1 1071.69   27.50
   1  -6  -1 1095.49   26.00
   1  -6  -1 1107.49   28.20
   1   6  -1 1086.49   27.90
  -1   6   1 1133.69   28.50
  -1   6   1 1118.09   28.00
   1   6  -1 1091.39   28.00
   1   6  -1 1096.89   28.20
  -1   6   1 1121.49   27.70
   1   6  -1 1078.49   27.10
  -1   6   1 1063.39   25.60
   0  -6  -1   35.80    4.20
   0  -6   1   40.40    4.50
   0  -6   1   37.20    4.00
   0  -6  -1   42.10    4.60
   0  -6   1   39.60    3.30
   0  -6  -1   37.40    4.70
   0   6   1   40.40    4.10
   0   6  -1   40.40    3.70
   0   6  -1   45.40    4.40
   0   6   1   47.80    4.30
   0   6  -1   38.30    4.00
   0   6   1   36.80    4.30
   0   6  -1   40.10    4.30
   1  -6   1  234.88   10.50
   1  -6   1  249.38    9.30
  -1  -6  -1  218.38    9.30
  -1  -6  -1  233.38   11.00
  -1  -6  -1  237.48    7.70
   1  -6   1  244.08    9.30
  -1   6  -1  242.98    6.70
   1   6   1  245.08    9.30
  -1   6  -1  237.58    9.30
  -1   6  -1  249.78    9.70
   1   6   1  228.58    9.60
  -1   6  -1  221.78    9.20
   1   6   1  247.88    8.40
   2  -6   1  152.28    7.90
   2  -6   1  159.18    8.90
  -2  -6  -1  148.89   10.40
   2  -6   1  146.59    7.80
   2  -6   1  156.48    7.40
   2  -6   1  142.99    9.70
  -2  -6  -1  155.98    7.90
   2   6   1  156.98    7.60
   2   6   1  147.49    8.10
   2   6   1  150.38    7.20
  -2   6  -1  143.39    8.90
  -2   6  -1  145.99    8.70
   2   6   1  140.29    8.90
  -3  -6  -1  279.87   15.80
   3  -6   1  298.57   15.30
   3  -6   1  292.27   11.80
   3  -6   1  270.37   10.90
   3  -6   1  286.87   14.00
   3   6   1  293.07   12.40
  -3   6  -1  279.77   13.80
  -3   6  -1  274.17   14.50
   3   6   1  262.57   11.80
   3   6   1  289.77   11.90
  -3   6  -1  279.77    9.20
   4  -6   1   41.60    7.70
   4  -6   1   46.70    6.10
   4  -6   1   47.50    8.70
  -4  -6  -1   43.30    9.00
   4  -6   1   42.60    5.40
   4   6   1   43.00    5.60
  -4   6  -1   52.29    5.70
  -4   6  -1   55.29    8.40
  -4   6  -1   49.50    8.50
   4   6   1   61.59    7.60
   4   6   1   44.90    5.80
   5  -6   1   80.79    7.00
   5  -6   1   69.19    7.30
  -5  -6  -1   75.39   11.90
   5  -6   1   71.99   10.00
   5  -6   1   78.89   11.10
   5  -6   1   72.99    7.00
   5   6   1   76.89    7.80
   5   6   1   67.09    9.10
  -5   6  -1   66.89   10.90
  -5   6  -1   81.69    7.80
  -5   6  -1   76.59   10.30
   5   6   1   59.89    6.60
  -6  -6  -1    6.90    8.50
   6  -6   1    1.10    4.40
   6  -6   1    8.50    5.40
   6  -6   1    6.90    4.40
   6  -6   1   -2.60    6.70
   6  -6   1    2.70    7.80
  -6   6  -1    4.40    6.30
  -6   6  -1    3.10    5.50
   6   6   1    2.70    5.00
   6   6   1    2.30    4.90
   7  -6   1   90.39    9.20
   7  -6   1   73.39   11.90
   7  -6   1   75.69   11.90
   7  -6   1   89.89    9.40
  -7  -6  -1   98.69   16.30
   7   6   1   91.49   10.20
   7   6   1  118.39   13.50
  -7   6  -1   91.29   11.40
  -7   6  -1   96.69   14.70
  -8  -6  -1   71.59   15.30
   8  -6   1   67.29    9.30
   8  -6   1   61.79   12.40
   8  -6   1   65.59   13.40
   8   6   1   63.39   11.10
  -8   6  -1   74.39   14.40
  -8   6  -1   79.39   14.70
   8   6   1   73.69   10.30
   9  -6   1  161.38   19.30
  -9  -6  -1  152.48   22.10
  -9  -6  -1  144.29   21.60
   9  -6   1  162.68   14.30
   9  -6   1  133.59   16.70
  -9   6  -1  166.48   22.20
   9   6   1  159.58   17.00
  -9   6  -1  169.08   20.90
   9   6   1  164.68   14.70
  10  -6   1   -2.20    9.90
  10  -6   1    2.20    7.50
 -10  -6  -1    8.10   13.00
  10  -6   1   36.90   13.80
 -10  -6  -1    0.40   12.90
  10   6   1    5.40   10.20
 -10   6  -1    8.60   13.40
 -10   6  -1   26.00   14.00
  10   6   1    7.40    9.00
  11  -6   1   11.10    9.90
 -11  -6  -1   23.10   17.30
  11  -6   1   32.40   15.60
 -11  -6  -1   20.10   15.90
  11   6   1   33.90   12.60
 -11   6  -1    8.60   16.60
 -11   6  -1   11.50   14.00
  11   6   1   36.40   16.40
  11  -7  -1   36.70    9.10
  11  -7  -1   31.60   15.60
  11  -7  -1   28.60   15.10
 -11  -7   1   10.80   16.90
 -11  -7   1   19.30   17.50
 -11   7   1   14.60   18.20
  11   7  -1   83.19   12.30
 -11   7   1   62.69   17.60
  10  -7  -1    5.00    7.50
 -10  -7   1   41.90   16.30
  10  -7  -1   13.50   11.70
  10  -7  -1   32.40   12.20
 -10   7   1   16.30   13.70
  10   7  -1   22.30    9.20
 -10   7   1   14.10   13.20
   9  -7  -1    5.00    9.10
   9  -7  -1   -1.60    6.10
   9  -7  -1   14.30   10.10
  -9  -7   1   -4.40   10.90
   9   7  -1    1.60    6.80
  -9   7   1   28.10   11.50
   9   7  -1  -11.10    7.40
  -9   7   1   11.00   10.30
   8  -7  -1   10.30    5.80
   8  -7  -1   17.30    9.20
   8  -7  -1   13.30    7.40
  -8  -7   1   18.80   11.70
   8  -7  -1   21.40   10.70
  -8   7   1    9.80    9.40
   8   7  -1   10.00    7.20
   8   7  -1   19.90    6.40
  -8   7   1   12.40    9.70
   7  -7  -1   32.20    8.00
   7  -7  -1   25.10    5.80
   7  -7  -1   56.19   11.80
  -7  -7   1   44.40   12.40
   7  -7  -1   41.00    6.30
   7  -7  -1   39.50    9.90
  -7   7   1   46.90   10.30
   7   7  -1   37.20    8.10
  -7   7   1   38.20    8.10
   7   7  -1   50.69    7.20
  -7   7   1   34.30   10.20
   7   7  -1   44.00    6.40
   6  -7  -1    0.60    4.50
   6  -7  -1   20.50    8.50
   6  -7  -1    0.00    5.20
   6  -7  -1    5.20    7.30
   6  -7  -1    1.10    3.60
  -6  -7   1    8.10    8.60
   6   7  -1   -3.00    4.70
  -6   7   1    5.10    5.00
  -6   7   1   -3.50    6.60
   6   7  -1   10.20    4.80
   6   7  -1    7.00    4.00
  -6   7   1   10.60    6.70
   5  -7  -1   85.19    6.70
   5  -7  -1  102.09    9.90
   5  -7  -1  103.19   11.40
  -5  -7   1   86.49   12.60
   5  -7  -1   82.99    7.50
   5  -7  -1   95.89   11.60
   5   7  -1   88.49    7.40
   5   7  -1   79.49    7.30
  -5   7   1   96.09   10.80
  -5   7   1   79.59    7.30
  -5   7   1   88.79   11.10
   5   7  -1  102.19    8.70
   4  -7  -1   76.49    9.60
   4  -7  -1   91.39    8.70
   4  -7  -1   74.79    9.50
   4  -7  -1   77.19    5.20
   4  -7  -1   82.99    6.50
   4  -7  -1   77.69    6.10
  -4  -7   1  101.49   12.80
  -4   7   1   77.49    8.50
   4   7  -1   89.19    9.60
  -4   7   1   92.79   10.00
   4   7  -1   81.19    6.80
   4   7  -1   78.29    7.00
   4   7  -1   86.69    6.70
   3  -7  -1  911.21   27.60
   3  -7  -1  923.41   24.40
   3  -7  -1  883.31   22.10
   3  -7  -1  946.31   27.00
   3  -7  -1  891.41   24.60
   3   7  -1  924.51   25.40
  -3   7   1  905.41   28.00
  -3   7   1  901.91   26.00
   3   7  -1  952.90   23.70
   3   7  -1  932.81   27.60
   3   7  -1  991.10   28.80
   2  -7  -1    6.30    4.10
   2  -7  -1    4.50    4.10
   2  -7  -1    3.40    1.70
   2  -7  -1    6.80    3.30
   2  -7  -1    6.90    5.30
   2   7  -1    3.30    3.70
   2   7  -1    0.50    2.00
   2   7  -1    1.10    3.80
  -2   7   1    7.50    3.10
   2   7  -1    3.70    3.10
   2   7  -1    6.40    3.30
  -2   7   1    5.00    3.70
   1  -7  -1  425.86   14.30
   1  -7  -1  419.26   13.60
  -1  -7   1  426.06   13.70
   1  -7  -1  432.96   15.30
   1  -7  -1  440.26   12.50
  -1   7   1  435.16   13.90
  -1   7   1  430.16   11.90
   1   7  -1  430.36   14.00
  -1   7   1  419.16   14.20
   1   7  -1  438.56   13.50
   1   7  -1  435.26   10.80
  -1   7   1  410.06   13.80
   1   7  -1  380.86   13.80
   1   7  -1  436.96   14.20
   0  -7  -1  121.99    7.20
   0  -7   1  111.99    7.20
   0  -7  -1  144.59    7.60
   0  -7  -1  122.89    7.10
   0  -7   1  113.69    5.40
   0  -7   1  129.09    6.90
   0   7  -1  112.99    6.40
   0   7   1  119.29    6.40
   0   7  -1  131.69    7.20
   0   7   1  115.79    7.30
   0   7   1  113.29    6.40
   0   7  -1  115.69    6.50
   0   7  -1  120.49    5.80
  -1  -7  -1  259.67    8.80
   1  -7   1  268.17   11.70
  -1  -7  -1  251.27   10.40
   1  -7   1  258.07   10.10
   1  -7   1  256.27    9.80
  -1  -7  -1  259.37   12.00
   1   7   1  256.57    9.00
  -1   7  -1  253.27   10.20
  -1   7  -1  244.28    7.30
   1   7   1  265.17   10.80
   1   7   1  232.08    9.90
  -1   7  -1  252.77   10.40
  -1   7  -1  257.67   10.40
  -2  -7  -1  245.48   13.50
  -2  -7  -1  258.47   10.80
   2  -7   1  247.48   11.40
   2  -7   1  237.58   10.70
   2  -7   1  235.88   12.70
   2  -7   1  246.78   10.20
  -2   7  -1  253.97   12.10
   2   7   1  222.88   10.90
  -2   7  -1  250.07   10.20
   2   7   1  262.87   10.00
   2   7   1  239.88   11.60
   2   7   1  246.28    9.60
  -2   7  -1  242.58   11.30
   3  -7   1  283.87   14.20
   3  -7   1  268.77   11.30
   3  -7   1  274.97   15.20
   3  -7   1  294.07   12.50
  -3  -7  -1  281.37   16.10
   3   7   1  269.67   12.40
   3   7   1  286.57   12.10
   3   7   1  285.57   12.20
  -3   7  -1  274.37   13.60
  -3   7  -1  300.67   15.00
   3   7   1  271.37   11.60
   4  -7   1  662.23   20.00
   4  -7   1  643.34   20.60
  -4  -7  -1  633.64   26.40
   4  -7   1  689.73   20.70
   4  -7   1  652.53   23.90
   4  -7   1  659.23   25.00
  -4   7  -1  632.84   18.10
   4   7   1  695.13   22.10
   4   7   1  634.34   21.10
   4   7   1  667.63   21.60
  -4   7  -1  648.94   24.80
  -4   7  -1  654.93   24.10
   5  -7   1  521.85   17.80
   5  -7   1  532.95   18.40
  -5  -7  -1  524.55   25.00
   5  -7   1  502.85   18.20
   5  -7   1  509.85   22.30
   5  -7   1  547.55   23.80
  -5   7  -1  529.65   23.90
   5   7   1  508.35   18.90
   5   7   1  505.35   19.90
   5   7   1  514.15   19.00
  -5   7  -1  508.65   17.10
  -5   7  -1  544.35   23.00
   6  -7   1   -0.60    4.60
   6  -7   1   -2.30    7.00
   6  -7   1    1.30    5.10
   6  -7   1    5.70    4.70
  -6  -7  -1    1.20    8.10
   6   7   1   -7.00    6.10
  -6   7  -1   -2.10    6.80
   6   7   1   -1.80    4.60
  -6   7  -1   -0.10    5.50
   6   7   1    4.70    5.30
  -6   7  -1   -6.30    7.10
   7  -7   1   94.99    9.70
   7  -7   1   94.49   13.50
   7  -7   1   85.29   13.40
  -7  -7  -1   90.79   16.30
  -7   7  -1   97.29   11.20
   7   7   1   85.79   10.10
   7   7   1   94.89   12.50
  -7   7  -1   86.59   14.30
  -7   7  -1  110.79   15.70
   8  -7   1  210.58   13.80
  -8  -7  -1  215.98   24.20
   8  -7   1  219.88   21.30
   8  -7   1  184.08   18.80
  -8   7  -1  224.18   22.60
   8   7   1  220.78   15.90
  -8   7  -1  250.77   21.70
   8   7   1  236.78   18.00
   9  -7   1   23.10    8.30
  -9  -7  -1    7.90   14.40
  -9  -7  -1   27.80   14.70
   9  -7   1   11.10   11.00
   9  -7   1   32.30   11.80
  -9   7  -1   21.50   12.20
   9   7   1   46.50   10.80
  -9   7  -1   25.10   12.70
   9   7   1   38.80    9.80
 -10  -7  -1   60.49   18.10
  10  -7   1   52.89   15.70
  10  -7   1   69.79   11.50
 -10  -7  -1   51.59   18.60
  10  -7   1   64.39   15.30
  10   7   1   67.59   12.30
 -10   7  -1   55.59   15.50
  10   7   1   70.99   14.80
 -10   7  -1   72.29   17.60
  11  -7   1   51.59   12.60
 -11  -7  -1   49.60   19.90
  11   7   1   64.39   13.80
 -11   7  -1   77.89   21.50
  11  -8  -1   18.00   14.70
  11  -8  -1   -0.30    8.40
  11  -8  -1    4.00   12.90
 -11  -8   1   10.30   16.40
 -11  -8   1   17.70   16.30
  11   8  -1   23.60   10.40
 -11   8   1   -9.20   15.50
 -11   8   1   -2.20   15.50
 -10  -8   1   72.29   18.50
  10  -8  -1   71.49   15.20
  10  -8  -1   50.89    8.70
  10  -8  -1   46.70   13.90
 -10   8   1   52.59   17.10
 -10   8   1   40.10   14.30
  10   8  -1   53.19   11.00
   9  -8  -1   23.20    7.40
   9  -8  -1   27.90   12.00
  -9  -8   1   71.19   16.30
   9  -8  -1   46.20   12.60
   9   8  -1   65.29   10.30
  -9   8   1   63.49   14.50
   9   8  -1   66.69   11.60
  -9   8   1   56.69   14.60
   8  -8  -1    7.60    9.20
   8  -8  -1   12.30    6.40
   8  -8  -1   20.90    7.10
  -8  -8   1   14.90   12.00
   8  -8  -1   37.20   11.20
   8   8  -1    8.50    7.00
  -8   8   1   13.60   10.10
  -8   8   1   21.60   10.00
   8   8  -1   18.20    6.80
   7  -8  -1  133.19   16.00
   7  -8  -1  161.28   16.50
  -7  -8   1  163.78   20.60
   7  -8  -1  162.68   14.00
   7   8  -1  139.39   12.00
   7   8  -1  154.98   11.70
  -7   8   1  156.48   16.10
  -7   8   1  164.98   17.60
  -6  -8   1  426.66   24.80
   6  -8  -1  449.06   19.60
   6  -8  -1  467.65   22.40
   6  -8  -1  418.76   23.40
   6  -8  -1  416.16   15.80
  -6   8   1  404.86   20.90
   6   8  -1  422.56   16.90
  -6   8   1  406.46   16.50
   6   8  -1  422.36   17.30
   6   8  -1  393.66   16.00
  -6   8   1  427.36   22.70
   5  -8  -1    7.10    3.70
  -5  -8   1    1.70    7.40
   5  -8  -1    7.50    4.10
   5  -8  -1    3.80    4.70
   5  -8  -1   -2.40    6.10
   5  -8  -1    2.90    6.50
  -5   8   1   12.80    5.70
   5   8  -1   13.00    4.80
   5   8  -1   10.00    4.40
  -5   8   1   15.50    4.40
  -5   8   1    6.80    5.60
   5   8  -1    8.40    3.70
   4  -8  -1  421.66   19.90
   4  -8  -1  441.36   18.60
   4  -8  -1  405.46   17.00
   4  -8  -1  423.56   14.60
  -4  -8   1  423.26   21.40
   4  -8  -1  414.96   14.60
   4   8  -1  441.26   15.70
  -4   8   1  413.36   16.70
  -4   8   1  446.36   18.80
   4   8  -1  410.76   15.00
  -4   8   1  419.86   13.20
   4   8  -1  448.96   19.10
   3  -8  -1  272.27   13.10
   3  -8  -1  264.27   13.50
   3  -8  -1  251.07   10.80
   3   8  -1  259.47   11.80
  -3   8   1  263.27   11.70
   3   8  -1  246.08   12.80
  -3   8   1  245.38   12.80
   3   8  -1  266.57    9.30
   3   8  -1  266.47   13.60
   2  -8  -1  682.63   21.00
   2  -8  -1  645.54   15.40
   2  -8  -1  606.34   15.90
   2  -8  -1  649.43   19.50
   2  -8  -1  621.04   19.50
   2  -8  -1  633.74   22.60
   2  -8  -1  648.84   20.70
  -2   8   1  664.73   18.50
   2   8  -1  654.43   20.30
  -2   8   1  665.93   20.90
   2   8  -1  632.44   20.10
   2   8  -1  666.73   16.20
   2   8  -1  658.03   21.20
   2   8  -1  663.33   16.10
   1  -8  -1 1468.25   34.70
  -1  -8   1 1437.16   35.70
  -1  -8   1 1467.45   36.50
   1  -8  -1 1494.55   37.40
   1  -8  -1 1448.16   38.30
   1   8  -1 1441.86   37.00
   1   8  -1 1434.86   37.20
  -1   8   1 1408.66   36.70
   1   8  -1 1467.95   33.10
   1   8  -1 1494.15   36.20
   1   8  -1 1410.46   36.60
  -1   8   1 1428.26   36.60
  -1   8   1 1434.46   36.90
  -1   8   1 1475.55   34.30
   0  -8   1  376.86   13.70
   0  -8  -1  347.97   13.10
   0  -8  -1  329.77   12.80
   0  -8   1  358.36   12.90
   0  -8   1  348.87   10.90
   0  -8  -1  362.06   13.30
   0   8   1  376.86   12.50
   0   8  -1  398.56   12.90
   0   8  -1  375.26   13.60
   0   8  -1  346.47   12.60
   0   8   1  382.16   13.70
   0   8  -1  344.77   11.50
   0   8   1  366.16   12.70
   1  -8   1  449.16   14.80
   1  -8   1  406.46   13.80
   1  -8   1  425.96   16.10
  -1  -8  -1  414.46   14.90
  -1  -8  -1  405.46   16.40
  -1  -8  -1  396.96   12.90
  -1   8  -1  432.46   14.90
  -1   8  -1  431.96   14.40
   1   8   1  453.45   15.50
  -1   8  -1  414.46   14.60
   1   8   1  432.46   13.10
   1   8   1  382.56   14.20
  -1   8  -1  425.36   11.30
   2  -8   1  447.16   16.50
   2  -8   1  460.95   15.40
  -2  -8  -1  460.55   19.10
   2  -8   1  463.95   18.50
  -2  -8  -1  414.26   11.90
   2  -8   1  445.26   15.50
  -2  -8  -1  455.45   16.00
  -2   8  -1  441.36   17.00
  -2   8  -1  464.65   16.50
  -2   8  -1  434.26   15.10
   2   8   1  437.96   16.60
   2   8   1  453.35   14.40
   2   8   1  442.16   16.50
   3  -8   1   -0.90    3.40
   3  -8   1    5.10    4.10
   3  -8   1    5.40    6.40
   3  -8   1    2.70    4.10
   3  -8   1    7.30    5.20
  -3  -8  -1    0.10    6.00
  -3   8  -1    1.40    4.50
   3   8   1    2.90    3.80
   3   8   1   -1.10    4.90
   3   8   1    7.90    4.20
  -3   8  -1    8.00    5.20
   3   8   1    3.00    3.80
   3   8   1    5.20    4.10
   4  -8   1 1022.30   28.10
   4  -8   1 1010.00   28.70
   4  -8   1 1019.80   33.80
  -4  -8  -1 1050.39   35.80
   4  -8   1  985.10   31.60
   4   8   1 1028.00   29.80
  -4   8  -1  991.40   33.00
   4   8   1 1010.90   29.30
   4   8   1 1024.50   29.50
  -4   8  -1  947.81   24.20
  -4   8  -1  983.50   31.70
   5  -8   1  536.75   22.60
   5  -8   1  511.75   17.80
  -5  -8  -1  522.85   25.40
   5  -8   1  498.35   18.70
   5  -8   1  493.45   23.80
   5  -8   1  493.65   18.40
  -5   8  -1  498.95   23.30
   5   8   1  509.65   19.80
  -5   8  -1  468.95   15.90
  -5   8  -1  530.05   22.90
   5   8   1  486.65   18.40
   5   8   1  503.55   19.20
  -6  -8  -1   -3.70    8.20
   6  -8   1   -3.70    4.30
   6  -8   1   11.40    8.30
   6  -8   1   -0.60    5.40
  -6   8  -1    1.50    7.60
  -6   8  -1    6.60    7.60
   6   8   1   -1.80    6.60
   6   8   1    1.00    5.70
  -6   8  -1    4.10    5.00
   7  -8   1    0.30    7.50
   7  -8   1   10.80    9.20
  -7  -8  -1    6.20   10.50
   7  -8   1   -6.30    5.50
   7   8   1    1.50    6.30
  -7   8  -1   11.40    9.20
  -7   8  -1   -8.00    7.80
   7   8   1   10.30    7.40
   8  -8   1    4.90    9.80
  -8  -8  -1    0.80   10.80
   8  -8   1    9.40   10.00
   8  -8   1   13.40    6.60
  -8   8  -1   22.80   11.00
   8   8   1   16.70    8.50
  -8   8  -1   14.70   10.50
   8   8   1   11.80    7.70
   9  -8   1   -2.00    7.30
  -9  -8  -1   20.90   14.90
   9  -8   1   18.80   10.70
   9  -8   1  -14.10    9.50
   9   8   1    0.20    8.30
  -9   8  -1   -3.30   11.00
  -9   8  -1   -7.00   11.40
   9   8   1    4.70    8.40
 -10  -8  -1   37.80   16.80
  10  -8   1   13.90    9.90
 -10  -8  -1   48.50   17.10
  10  -8   1   37.20   14.60
  10  -8   1   27.90   12.50
 -10   8  -1   39.00   16.50
 -10   8  -1   11.90   15.50
  10   8   1   37.90   11.50
  10   8   1   20.60   11.80
  10  -9  -1   41.90   14.40
  10  -9  -1   23.00    8.50
  10  -9  -1   42.60   14.30
 -10  -9   1   58.29   18.20
 -10   9   1   46.70   17.60
 -10   9   1   58.19   16.00
  10   9  -1   46.20   10.70
   9  -9  -1    4.80    9.80
   9  -9  -1   -3.80    9.90
   9  -9  -1    1.70    6.10
  -9  -9   1   11.70   12.80
  -9   9   1   -3.10   10.30
   9   9  -1    8.10    7.80
  -9   9   1    5.10   10.30
   8  -9  -1  298.77   18.00
  -8  -9   1  279.47   25.80
   8  -9  -1  312.17   21.90
   8  -9  -1  293.77   22.00
   8   9  -1  266.57   16.80
  -8   9   1  262.07   20.60
   8   9  -1  296.97   16.50
  -8   9   1  296.77   22.50
  -7  -9   1    9.90   10.30
   7  -9  -1   -3.90    4.80
   7  -9  -1   -5.10    8.10
   7  -9  -1    0.10    5.80
   7  -9  -1    5.40    8.40
   7   9  -1    2.10    5.40
  -7   9   1   -8.80    7.20
  -7   9   1   -3.20    7.00
   7   9  -1    1.00    5.80
   6  -9  -1   31.70   10.20
   6  -9  -1   50.79    7.00
   6  -9  -1   57.19    9.10
   6  -9  -1   57.09    6.90
   6  -9  -1   48.20   10.50
  -6  -9   1   66.89   13.30
   6   9  -1   63.49    8.20
   6   9  -1   45.00    7.50
  -6   9   1   61.69    7.40
  -6   9   1   53.99   10.50
  -6   9   1   59.19   10.10
   6   9  -1   54.59    7.20
   5  -9  -1  123.89   13.10
   5  -9  -1  113.69    9.00
   5  -9  -1  104.99   13.20
  -5  -9   1  146.89   16.60
   5  -9  -1  116.19    8.60
  -5   9   1  111.79   11.10
   5   9  -1  122.39    9.60
   5   9  -1  115.39    8.60
  -5   9   1  104.69   12.00
   5   9  -1  118.29    8.80
  -5   9   1  110.29    7.20
   4  -9  -1    6.70    6.30
   4  -9  -1    2.50    4.60
  -4  -9   1   -4.80    6.50
   4  -9  -1    5.70    5.10
   4  -9  -1   -0.50    3.20
   4  -9  -1    7.40    4.00
   4   9  -1    0.90    3.40
   4   9  -1    4.30    5.20
  -4   9   1    3.20    4.60
  -4   9   1    8.10    4.50
   3  -9  -1  122.39   10.50
  -3  -9   1  162.68   14.70
   3  -9  -1  124.99   10.10
   3  -9  -1  134.29    8.60
  -3   9   1  134.99   10.30
   3   9  -1  149.88   10.50
   3   9  -1  134.19    6.50
   3   9  -1  144.39    9.50
   3   9  -1  139.79   10.50
   3   9  -1  125.29    8.90
  -3   9   1  143.89    8.80
  -2  -9   1   68.79    6.70
   2  -9  -1   63.29    9.10
   2  -9  -1   66.39    6.80
   2  -9  -1   64.89    7.60
   2  -9  -1   68.59    8.10
   2  -9  -1   66.09    4.40
  -2   9   1   62.89    7.40
   2   9  -1   66.79    4.50
   2   9  -1   78.69    8.30
   2   9  -1   67.59    7.20
   2   9  -1   68.59    7.20
  -2   9   1   74.89    6.40
   1  -9  -1  101.59    9.70
   1  -9  -1   94.79    8.20
   1  -9  -1  103.29    8.80
  -1  -9   1  101.39    8.20
  -1  -9   1   88.89    7.50
   1  -9  -1  100.09    7.00
   1   9  -1   86.49    8.10
   1   9  -1   89.29    7.50
  -1   9   1   84.89    7.60
  -1   9   1   84.29    5.90
   1   9  -1   92.09    7.40
   1   9  -1  100.49    5.10
  -1   9   1   86.49    7.60
   1   9  -1   97.89    7.60
  -1   9   1   93.69    7.80
   0  -9  -1  634.04   20.20
   0  -9  -1  660.93   20.70
   0  -9  -1  643.34   20.20
   0  -9   1  643.04   17.60
   0  -9   1  650.33   20.00
   0  -9   1  662.03   20.80
   0   9   1  684.93   21.00
   0   9  -1  651.43   19.80
   0   9  -1  643.54   20.60
   0   9   1  683.33   20.00
   0   9   1  655.23   19.30
   0   9  -1  609.74   19.30
   0   9  -1  674.73   18.50
  -1  -9  -1 1158.88   33.20
   1  -9   1 1137.89   32.40
   1  -9   1 1103.59   30.40
   1  -9   1 1120.39   29.60
  -1  -9  -1 1193.28   31.40
  -1  -9  -1 1126.59   28.90
   1  -9   1 1129.49   27.80
   1   9   1 1152.08   28.80
   1   9   1 1098.99   31.40
   1   9   1 1147.79   30.80
  -1   9  -1 1088.79   30.60
  -1   9  -1 1090.89   30.00
  -1   9  -1 1179.18   31.20
  -2  -9  -1 1349.77   40.30
   2  -9   1 1390.06   39.60
   2  -9   1 1331.77   36.70
   2  -9   1 1383.06   35.90
  -2  -9  -1 1425.96   36.60
   2  -9   1 1370.36   36.30
  -2  -9  -1 1365.26   32.60
   2   9   1 1395.06   34.60
  -2   9  -1 1409.06   36.70
  -2   9  -1 1388.06   36.00
   2   9   1 1429.06   37.80
  -2   9  -1 1412.16   37.90
   2   9   1 1372.06   37.50
   3  -9   1  163.88   11.60
   3  -9   1  185.18   10.00
   3  -9   1  156.38   12.90
   3  -9   1  176.18   10.40
  -3  -9  -1  146.89   13.10
  -3   9  -1  189.68   11.20
   3   9   1  163.88   11.30
  -3   9  -1  158.18   11.50
   3   9   1  181.38   10.80
   3   9   1  180.58    9.30
   3   9   1  168.18    9.70
  -4  -9  -1  261.47   17.20
   4  -9   1  230.28   11.50
   4  -9   1  266.37   12.50
   4  -9   1  234.68   14.30
   4  -9   1  244.48   16.30
   4   9   1  239.28   11.90
  -4   9  -1  254.97   14.30
   4   9   1  232.38   12.30
   4   9   1  209.58   12.00
  -4   9  -1  247.38   15.00
   4   9   1  245.98   13.20
   5  -9   1    7.80    4.50
  -5  -9  -1   12.60    8.30
   5  -9   1   19.30    7.70
   5  -9   1   12.00    8.60
   5  -9   1    5.00    5.60
   5  -9   1    9.20    4.80
   5   9   1    8.80    5.50
  -5   9  -1   13.00    3.80
   5   9   1    3.90    5.00
  -5   9  -1    9.10    7.20
  -5   9  -1   10.00    6.50
   6  -9   1   20.30    8.80
  -6  -9  -1   35.30   11.80
   6  -9   1   14.70    5.80
   6  -9   1   16.90    6.10
  -6   9  -1    6.00    8.30
   6   9   1   15.60    7.20
   6   9   1   16.60    6.60
  -6   9  -1    9.80    7.80
   7  -9   1   -5.40    5.30
   7  -9   1    3.90    8.10
  -7  -9  -1    1.30   10.50
   7  -9   1   12.30    9.50
   7   9   1   -4.60    6.30
  -7   9  -1    7.00    8.20
  -7   9  -1  -13.90    8.00
   7   9   1   -3.70    7.50
  -8  -9  -1   82.49   17.00
   8  -9   1   54.99   13.40
   8  -9   1   59.19    9.70
   8  -9   1   83.09   14.60
   8   9   1   83.79   12.00
  -8   9  -1   63.49   14.00
  -8   9  -1   65.99   14.60
   8   9   1   73.09   12.20
   9  -9   1   57.59   14.70
   9  -9   1   29.30    9.30
  -9  -9  -1   69.59   18.60
   9  -9   1   57.79   14.90
  -9   9  -1   78.19   16.30
   9   9   1   74.99   12.40
   9   9   1   61.79   12.20
  -9   9  -1   78.79   17.70
 -10  -9  -1  150.88   24.60
 -10  -9  -1  139.69   23.30
  10  -9   1  174.48   21.10
  10  -9   1  172.08   23.40
  10  -9   1  141.29   14.90
  10   9   1  171.28   17.70
 -10   9  -1  198.08   24.90
 -10   9  -1  125.99   23.10
  10 -10  -1   16.70    7.90
  10 -10  -1    8.30   12.80
 -10 -10   1   27.00   16.20
  10 -10  -1   44.60   14.70
 -10  10   1   35.20   14.50
  10  10  -1   24.80    9.80
 -10  10   1   29.90   13.40
   9 -10  -1    5.10    6.50
  -9 -10   1   27.50   12.90
   9 -10  -1   21.90   11.10
   9 -10  -1   15.60   10.40
   9  10  -1    6.20    8.20
  -9  10   1   24.20   12.00
  -9  10   1   29.60   12.30
   8 -10  -1    0.70    9.60
   8 -10  -1    1.80    7.60
  -8 -10   1  -11.60   11.00
   8 -10  -1   -6.30    7.80
   8 -10  -1   -1.20    6.10
   8  10  -1    5.30    7.40
  -8  10   1    0.40    8.70
   8  10  -1    9.80    7.20
  -8  10   1    4.50    9.00
   7 -10  -1    0.50    5.00
   7 -10  -1   -5.00    6.60
  -7 -10   1    4.70   10.10
   7 -10  -1   -1.70    7.70
   7 -10  -1   -0.60    8.30
  -7  10   1   -1.50    7.90
  -7  10   1    5.00    7.40
   7  10  -1   -3.70    5.10
   7  10  -1   -7.70    5.30
   6 -10  -1   83.79   12.00
   6 -10  -1   75.49   12.80
  -6 -10   1   81.19   14.20
   6 -10  -1   63.79    7.70
   6 -10  -1   72.69   10.20
  -6  10   1   34.50    9.00
   6  10  -1   79.59    9.40
   6  10  -1   70.19    8.40
  -6  10   1   63.69   10.30
   5 -10  -1   32.90    8.40
   5 -10  -1   33.20    5.60
   5 -10  -1   36.20    9.80
   5 -10  -1   33.50    6.10
  -5 -10   1   48.90   11.70
   5 -10  -1   35.70    8.00
  -5  10   1   43.50    8.60
   5  10  -1   40.90    6.10
   5  10  -1   39.50    6.40
  -5  10   1   35.20    7.20
   5  10  -1   35.40    6.50
   4 -10  -1  178.58   12.10
   4 -10  -1  215.98   13.70
   4 -10  -1  171.88   10.70
   4 -10  -1  205.08   15.10
  -4 -10   1  202.28   16.10
   4 -10  -1  181.98   10.40
  -4  10   1  189.98   11.50
   4  10  -1  192.18   11.30
   4  10  -1  183.78    8.90
  -4  10   1  201.08   13.10
   3 -10  -1  209.28   10.70
   3 -10  -1  200.58   10.60
   3 -10  -1  203.58   12.60
   3 -10  -1  201.48   14.80
  -3 -10   1  221.68   15.60
   3 -10  -1  198.88   12.20
  -3  10   1  233.38   12.70
   3  10  -1  207.98   11.50
   3  10  -1  202.48   12.00
  -3  10   1  207.98   10.50
   3  10  -1  211.18   12.30
   3  10  -1  223.38   13.00
   3  10  -1  218.08    8.10
   3  10  -1  218.98    8.40
   2 -10  -1  577.44   22.00
   2 -10  -1  566.74   18.60
   2 -10  -1  539.85   13.60
  -2 -10   1  557.44   18.40
   2 -10  -1  558.54   19.50
   2 -10  -1  569.64   20.10
  -2 -10   1  574.14   17.30
   2 -10  -1  512.85   14.40
  -2 -10   1  536.15   22.20
   2  10  -1  588.04   14.70
   2  10  -1  543.65   19.40
   2  10  -1  547.15   18.80
  -2  10   1  585.34   19.10
  -2  10   1  538.95   16.70
   2  10  -1  565.04   14.50
  -2  10   1  538.45   19.40
   2  10  -1  565.34   19.90
   1 -10  -1  484.95   18.20
   1 -10  -1  473.35   17.20
   1 -10  -1  433.76   18.30
  -1 -10   1  481.45   16.90
  -1 -10   1  454.65   16.30
   1 -10  -1  471.55   15.20
  -1  10   1  456.85   14.50
   1  10  -1  460.75   17.40
   1  10  -1  453.85   16.30
   1  10  -1  458.45   16.90
  -1  10   1  484.75   17.10
  -1  10   1  469.75   16.80
   1  10  -1  462.75   13.20
   1  10  -1  436.36   15.90
  -1  10   1  461.45   16.70
   0 -10   1  184.98   11.00
   0 -10  -1  176.48   10.80
   0 -10   1  176.38   10.40
   0 -10  -1  186.68   10.60
   0 -10  -1  182.18   11.20
   0  10  -1  203.98    9.10
   0  10  -1  181.38    8.70
   0  10  -1  180.18   10.00
   0  10   1  173.28   10.90
   0  10   1  179.78    9.50
   0  10  -1  183.48   10.90
   0  10   1  196.18   10.30
   0  10  -1  202.78   10.40
  -1 -10  -1    6.10    6.20
   1 -10   1   13.60    3.60
   1 -10   1   19.60    5.50
   1 -10   1   18.40    5.00
  -1 -10  -1   20.60    5.60
  -1 -10  -1   12.90    4.60
   1 -10   1   13.20    6.40
  -1  10  -1   19.40    5.10
   1  10   1   14.40    4.10
   1  10   1   10.80    4.80
   1  10   1   11.80    4.80
  -1  10  -1   21.30    5.10
  -1  10  -1   12.80    4.80
  -2 -10  -1  574.94   19.30
   2 -10   1  568.54   18.90
   2 -10   1  561.54   22.10
  -2 -10  -1  584.44   16.00
   2 -10   1  560.64   19.10
   2 -10   1  552.14   19.20
  -2 -10  -1  546.85   22.50
   2  10   1  497.45   19.30
  -2  10  -1  538.25   18.70
   2  10   1  551.84   20.20
   2  10   1  585.74   17.40
  -2  10  -1  569.94   19.30
  -2  10  -1  584.04   20.40
   3 -10   1  134.89    9.60
   3 -10   1  163.78   10.00
   3 -10   1  147.19   13.10
  -3 -10  -1  147.89   13.10
   3 -10   1  136.99   10.80
   3  10   1  137.89   10.20
   3  10   1  159.88    9.10
   3  10   1  148.39   11.60
  -3  10  -1  151.38   10.80
   3  10   1  146.49    8.70
  -3  10  -1  139.39   11.30
  -4 -10  -1  568.14   25.50
   4 -10   1  535.15   21.80
   4 -10   1  506.45   19.10
   4 -10   1  475.95   19.70
   4 -10   1  534.05   18.70
   4 -10   1  509.85   23.30
  -4  10  -1  527.35   22.20
   4  10   1  485.75   19.30
   4  10   1  527.15   18.70
  -4  10  -1  522.65   21.40
   4  10   1  506.85   20.10
   4  10   1  526.45   18.50
   5 -10   1    2.30    8.10
   5 -10   1    6.60    7.30
  -5 -10  -1   16.20    9.50
   5 -10   1   -3.20    4.80
   5 -10   1    2.50    5.20
  -5  10  -1    8.80    6.80
   5  10   1   -4.40    4.90
  -5  10  -1    2.20    6.10
   5  10   1    2.40    5.20
  -6 -10  -1   29.50   11.30
   6 -10   1   13.50    8.20
   6 -10   1    3.30    5.70
   6 -10   1   11.00    6.50
   6  10   1    7.20    6.50
   6  10   1    5.00    7.10
  -6  10  -1    8.20    7.20
  -6  10  -1   21.70    8.70
  -7 -10  -1    0.30   10.80
   7 -10   1   -6.00    5.90
   7 -10   1   -0.80    8.30
   7 -10   1   -1.10    8.30
   7  10   1    0.90    6.70
  -7  10  -1   -3.60    8.10
   7  10   1    0.70    6.70
  -7  10  -1   -2.10    7.90
   8 -10   1   -8.10    6.90
   8 -10   1   -0.70    9.60
  -8 -10  -1   -1.40   11.80
   8 -10   1   -4.10    8.60
   8  10   1   -7.70    7.20
  -8  10  -1    4.30    9.40
   8  10   1   10.80    8.60
  -8  10  -1  -13.60    9.30
   9 -10   1  144.89   19.80
   9 -10   1  198.58   22.40
  -9 -10  -1  159.88   24.00
   9 -10   1  148.79   14.50
   9  10   1  135.39   15.70
  -9  10  -1  150.58   21.20
  -9  10  -1  151.98   20.70
   9  10   1  161.28   16.90
 -10 -10  -1   29.40   17.10
 -10 -10  -1   14.00   14.90
  10 -10   1    9.50   12.80
  10 -10   1   19.40   13.00
  10 -10   1   -6.50    8.10
 -10  10  -1   17.40   14.20
 -10  10  -1   -0.80   13.50
  10  10   1   26.50   11.20
  10 -11  -1    9.60   13.10
  10 -11  -1    6.60   11.80
  10 -11  -1   -5.50    6.50
 -10 -11   1  -11.60   14.30
 -10  11   1   -4.50   11.80
 -10  11   1  -14.10   13.50
  10  11  -1   -0.40    9.00
   9 -11  -1   69.99   15.00
   9 -11  -1   71.39   15.60
  -9 -11   1   27.50   15.40
   9 -11  -1   58.79    9.20
   9  11  -1   81.69   12.20
  -9  11   1   73.49   15.10
  -9  11   1   88.79   17.10
  -8 -11   1  111.99   20.50
   8 -11  -1   85.19    9.70
   8 -11  -1  108.29   17.20
   8 -11  -1  106.19   15.40
   8  11  -1  122.89   13.50
  -8  11   1  118.09   15.80
  -8  11   1  125.39   17.10
  -7 -11   1   77.29   16.30
   7 -11  -1   87.79   11.40
   7 -11  -1   62.09   13.30
   7 -11  -1   68.19    8.40
   7 -11  -1   59.39   12.20
   7  11  -1   75.69    9.20
   7  11  -1   96.89   11.10
  -7  11   1   76.09   12.20
  -7  11   1  103.69   14.50
   6 -11  -1   87.89    9.10
   6 -11  -1   82.69   13.00
   6 -11  -1   94.49   11.10
  -6 -11   1   85.49   16.20
   6 -11  -1  107.49   14.60
   6  11  -1   93.19    8.90
  -6  11   1   98.49   13.10
   6  11  -1   88.29   10.10
  -6  11   1   85.89   11.40
   5 -11  -1  389.16   18.80
   5 -11  -1  406.86   22.20
   5 -11  -1  398.26   20.30
  -5 -11   1  385.86   23.50
   5 -11  -1  335.57   15.60
   5 -11  -1  394.06   16.40
   5  11  -1  366.66   14.30
  -5  11   1  419.16   20.40
  -5  11   1  372.76   18.00
   5  11  -1  374.06   17.20
   4 -11  -1    8.40    4.50
  -4 -11   1   17.80    8.70
   4 -11  -1   24.40    7.20
   4 -11  -1   17.80    6.40
   4 -11  -1   10.60    7.00
  -4  11   1   17.70    5.50
   4  11  -1   17.00    4.40
   4  11  -1   19.30    5.80
  -4  11   1   19.60    6.50
   4  11  -1    7.80    6.10
   3 -11  -1  447.16   17.00
   3 -11  -1  467.25   18.70
   3 -11  -1  458.85   18.50
   3 -11  -1  465.75   21.40
  -3 -11   1  467.75   22.40
  -3 -11   1  441.16   14.60
   3  11  -1  458.35   13.50
   3  11  -1  455.45   13.40
   3  11  -1  464.95   18.10
  -3  11   1  464.45   16.10
  -3  11   1  473.55   19.00
   3  11  -1  474.65   18.70
   2 -11  -1  189.68   11.10
   2 -11  -1  189.48    7.50
  -2 -11   1  178.78    9.30
   2 -11  -1  174.68   13.10
   2 -11  -1  209.08   12.50
   2 -11  -1  193.58   11.40
  -2 -11   1  206.28   14.20
  -2 -11   1  192.58   10.80
  -2  11   1  205.48   11.00
  -2  11   1  213.48   11.90
   2  11  -1  195.48   11.60
   2  11  -1  176.98   11.00
   2  11  -1  183.08   10.90
  -2  11   1  194.28    9.40
   2  11  -1  194.68    7.30
  -1 -11   1   43.40    6.50
  -1 -11   1   38.30    6.40
   1 -11  -1   35.70    6.40
   1 -11  -1   32.10    6.60
   1 -11  -1   50.69    6.50
   1 -11  -1   41.70    8.20
  -1 -11   1   49.00    8.30
   1  11  -1   42.00    6.70
  -1  11   1   43.80    5.20
  -1  11   1   49.40    6.60
  -1  11   1   43.50    6.30
   1  11  -1   39.90    6.30
  -1  11   1   39.00    6.60
   1  11  -1   47.70    6.50
   1  11  -1   50.49    4.70
   0 -11   1   46.20    7.30
   0 -11  -1   39.30    7.00
   0 -11  -1   44.90    6.90
   0 -11   1   25.80    5.90
   0 -11  -1   36.50    6.90
   0  11   1   44.10    6.40
   0  11  -1   44.90    6.30
   0  11   1   32.70    5.40
   0  11   1   40.60    6.50
   0  11  -1   30.40    6.00
   0  11  -1   26.00    5.90
   0  11  -1   37.90    5.40
   1 -11   1  265.37   11.60
   1 -11   1  266.37   14.40
  -1 -11  -1  255.17   14.60
  -1 -11  -1  257.47   13.20
   1 -11   1  239.38   10.20
  -1 -11  -1  266.97   11.80
   1 -11   1  249.08   12.70
  -1  11  -1  247.68   12.80
   1  11   1  251.87   12.60
  -1  11  -1  242.48   12.30
   1  11   1  265.87   10.90
   1  11   1  288.17   13.80
  -1  11  -1  263.87   12.20
  -2 -11  -1  255.27   12.60
  -2 -11  -1  252.17   15.50
   2 -11   1  267.67   12.80
  -2 -11  -1  252.47   10.00
   2 -11   1  269.67   12.90
   2 -11   1  250.57   12.80
   2 -11   1  263.57   15.60
  -2  11  -1  253.97   12.40
   2  11   1  265.57   11.00
   2  11   1  252.67   13.40
   2  11   1  240.48   13.00
  -2  11  -1  267.97   12.70
  -2  11  -1  221.58   12.70
  -3 -11  -1  764.62   30.20
   3 -11   1  833.82   29.90
   3 -11   1  797.22   25.30
   3 -11   1  802.82   25.10
   3 -11   1  783.32   26.50
   3  11   1  821.92   23.70
  -3  11  -1  755.92   25.70
   3  11   1  833.62   26.90
  -3  11  -1  821.82   27.70
   3  11   1  847.42   24.00
   3  11   1  834.92   27.70
   4 -11   1   13.50    6.30
   4 -11   1    6.40    5.30
   4 -11   1   12.70    8.10
  -4 -11  -1    9.50    8.50
   4 -11   1    2.60    4.50
   4 -11   1   -1.90    4.20
   4  11   1   12.00    5.00
   4  11   1    5.70    4.50
   4  11   1    1.00    4.60
  -4  11  -1    3.20    5.40
  -4  11  -1    0.00    5.10
  -5 -11  -1  230.88   21.90
   5 -11   1  275.57   19.90
   5 -11   1  246.68   14.10
   5 -11   1  256.07   17.10
   5 -11   1  255.47   14.60
   5  11   1  237.18   15.20
  -5  11  -1  245.18   16.30
   5  11   1  252.77   13.90
  -5  11  -1  289.47   18.20
  -6 -11  -1   30.00   12.70
   6 -11   1   27.00    6.50
   6 -11   1   46.30   10.60
   6 -11   1   35.70    7.70
   6  11   1   44.30    9.00
   6  11   1   43.40    9.00
  -6  11  -1   31.00    9.80
  -6  11  -1   36.80   10.20
   7 -11   1    5.70    9.60
  -7 -11  -1   -7.30   10.30
   7 -11   1    6.90    6.60
   7 -11   1   14.70   10.00
   7  11   1    2.40    6.90
  -7  11  -1   -3.30    8.10
  -7  11  -1  -16.00    7.70
   8 -11   1    1.70    9.30
   8 -11   1    4.60    7.10
  -8 -11  -1   37.50   14.10
   8 -11   1   -4.40    9.00
  -8  11  -1    6.80    9.60
   8  11   1   15.40    8.90
   8  11   1    6.00    7.70
  -8  11  -1   13.20   10.50
   9 -11   1   18.20    8.70
  -9 -11  -1   -3.20   13.60
   9 -11   1   -3.40   11.00
   9 -11   1   22.00   13.10
  -9  11  -1   37.20   13.00
   9  11   1   19.10   10.80
  -9  11  -1   13.60   12.70
 -10 -11  -1   11.50   17.30
  10 -11   1   -1.10   12.30
  10 -11   1   28.10   14.40
  10 -11   1   25.70   10.80
 -10 -11  -1   30.30   17.50
  10  11   1  -18.00   10.90
 -10  11  -1   17.20   14.90
 -10  11  -1   15.00   14.70
  10 -12  -1   13.30   12.00
  10 -12  -1    3.90    8.00
  10 -12  -1  -16.30   12.70
 -10 -12   1  -24.50   13.50
 -10  12   1   31.70   14.90
  10  12  -1   17.80   10.50
  -9 -12   1  199.48   27.00
   9 -12  -1  176.38   21.30
   9 -12  -1  196.18   22.50
   9 -12  -1  183.88   14.80
  -9  12   1  170.68   19.80
  -9  12   1  178.18   20.60
   9  12  -1  200.78   18.10
   8 -12  -1    1.20    9.60
   8 -12  -1   -0.10   10.00
  -8 -12   1   -0.10   12.80
   8 -12  -1    2.70    6.30
   8  12  -1   -4.00    7.10
  -8  12   1    4.60    9.10
  -8  12   1   -7.50    8.70
   7 -12  -1   -5.30    8.70
   7 -12  -1  -12.00    8.30
   7 -12  -1    0.20    7.10
  -7 -12   1    9.60   10.90
   7 -12  -1   -5.30    5.70
  -7  12   1    0.00    7.90
   7  12  -1   -0.70    6.40
  -7  12   1   -0.30    8.00
   6 -12  -1   36.80   10.30
   6 -12  -1   37.30   10.90
   6 -12  -1   23.50    7.00
  -6 -12   1   39.30   12.70
   6  12  -1   24.30    7.00
   6  12  -1   43.80    6.90
  -6  12   1   39.10    9.20
  -6  12   1   50.59   10.20
  -5 -12   1   24.30   10.20
   5 -12  -1   -0.30    6.00
   5 -12  -1    6.90    7.70
   5 -12  -1    5.80    4.90
   5 -12  -1    7.00    8.30
   5  12  -1   12.50    6.20
  -5  12   1    0.30    6.40
  -5  12   1   10.60    6.60
   4 -12  -1   13.60    5.40
   4 -12  -1   22.90    6.80
   4 -12  -1   24.90    7.20
  -4 -12   1   27.70    4.60
  -4 -12   1   30.70    9.90
   4  12  -1   20.10    7.00
   4  12  -1   20.40    5.60
   4  12  -1   20.90    5.80
  -4  12   1   20.50    6.00
   4  12  -1   20.60    4.00
  -4  12   1   28.60    6.90
  -3 -12   1   39.10    5.40
  -3 -12   1   27.90    8.80
   3 -12  -1   15.20    7.90
   3 -12  -1   36.10    7.30
   3 -12  -1   42.60    7.70
   3 -12  -1   24.20    5.60
  -3  12   1   27.50    6.80
   3  12  -1   34.30    6.80
   3  12  -1   35.90    6.60
   3  12  -1   33.20    4.10
  -3  12   1   28.30    5.60
   3  12  -1   42.70    4.20
  -2 -12   1  163.08   13.20
  -2 -12   1  164.48    9.60
   2 -12  -1  159.98    7.30
   2 -12  -1  163.68   10.70
   2 -12  -1  183.68   12.30
   2 -12  -1  178.58   13.70
  -2 -12   1  181.28   10.80
   2 -12  -1  181.78   11.40
  -2  12   1  162.58   10.40
  -2  12   1  166.18    8.80
   2  12  -1  190.58   11.20
  -2  12   1  197.98   12.20
   2  12  -1  171.48    7.20
  -2  12   1  196.28   11.30
   2  12  -1  178.78   11.60
  -1 -12   1   53.99    7.30
   1 -12  -1   60.49    7.10
   1 -12  -1   75.19    9.80
   1 -12  -1   80.89    9.40
   1 -12  -1   66.69    8.00
  -1 -12   1   57.69    7.40
  -1 -12   1   55.79    8.60
  -1  12   1   64.39    6.00
  -1  12   1   64.19    7.40
   1  12  -1   65.19    5.40
   1  12  -1   70.29    7.60
  -1  12   1   54.19    7.20
   1  12  -1   67.99    8.10
  -1  12   1   60.79    7.70
   0 -12  -1   -0.30    4.60
   0 -12   1    0.50    4.30
   0 -12   1   -4.50    4.20
   0 -12  -1    0.00    4.90
   0 -12  -1    2.20    4.70
   0 -12   1    4.80    5.00
   0  12  -1    9.00    3.90
   0  12  -1    2.00    4.60
   0  12   1   -3.40    4.20
   0  12  -1    5.20    4.50
   0  12   1   -0.80    4.10
   0  12   1    6.10    4.10
   0  12  -1    4.10    4.20
   1 -12   1   97.79    9.00
   1 -12   1  111.69    8.30
  -1 -12  -1  110.89    9.70
  -1 -12  -1  105.39    8.50
   1 -12   1   90.49   10.10
  -1 -12  -1   98.49   10.60
   1 -12   1   95.69    7.10
   1  12   1   97.69    9.50
  -1  12  -1  108.09    9.20
  -1  12  -1  103.79    8.60
   1  12   1   96.69    7.20
  -1  12  -1   97.79    9.10
   1  12   1   98.59    8.80
  -2 -12  -1  176.58   11.20
   2 -12   1  185.48   10.90
   2 -12   1  178.28   11.50
   2 -12   1  148.19   13.00
  -2 -12  -1  162.98   13.40
  -2 -12  -1  171.68    8.70
   2 -12   1  169.48   10.90
   2  12   1  151.48   11.20
  -2  12  -1  172.68   11.50
   2  12   1  165.68    9.10
  -2  12  -1  178.28   10.80
  -2  12  -1  148.39    9.80
   2  12   1  190.08   11.80
  -3 -12  -1  811.02   31.90
   3 -12   1  899.11   31.80
   3 -12   1  846.02   26.70
   3 -12   1  834.22   26.90
  -3 -12  -1  890.41   27.80
   3 -12   1  843.62   27.80
   3  12   1  847.42   28.30
   3  12   1  901.91   25.20
   3  12   1  799.42   28.20
  -3  12  -1  851.61   28.70
   3  12   1  840.62   24.50
  -3  12  -1  855.21   27.20
   4 -12   1    1.20    4.90
   4 -12   1    3.90    7.50
  -4 -12  -1    7.50    7.70
   4 -12   1   -0.30    5.00
   4 -12   1   -4.80    5.80
   4  12   1    5.30    5.30
  -4  12  -1   -1.10    5.50
   4  12   1    2.00    6.20
  -4  12  -1    1.00    5.90
   4  12   1   -2.00    4.30
   4  12   1   -2.50    4.30
   5 -12   1   12.90   10.00
   5 -12   1   15.80    6.20
  -5 -12  -1   21.10   11.10
   5 -12   1   14.60    6.30
   5 -12   1   12.60    8.40
  -5  12  -1    9.60    7.50
   5  12   1    9.40    6.40
   5  12   1   15.20    6.70
  -5  12  -1   10.40    7.50
   6 -12   1   -8.10    5.70
   6 -12   1   -3.10    7.80
  -6 -12  -1   -8.50    8.70
   6 -12   1    3.50    8.80
   6  12   1    1.60    6.30
  -6  12  -1    7.70    8.10
   6  12   1   -2.90    6.30
  -6  12  -1   -0.50    7.00
  -7 -12  -1   91.69   18.00
   7 -12   1  135.29   16.90
   7 -12   1  125.39   17.50
   7 -12   1  117.29   12.30
  -7  12  -1  122.09   16.40
  -7  12  -1  122.09   16.30
   7  12   1  145.89   15.10
  -8 -12  -1   10.40   12.90
   8 -12   1    9.80    8.40
   8 -12   1    1.10    9.40
   8 -12   1   21.80   12.00
   8  12   1   16.20    9.50
   8  12   1    9.40    8.50
  -8  12  -1    7.60   11.00
  -8  12  -1    6.80   11.00
  -9 -12  -1  404.76   34.00
   9 -12   1  402.06   29.80
   9 -12   1  415.16   28.80
  -9  12  -1  390.06   27.80
   9  12   1  425.06   25.50
  -9  12  -1  435.86   30.20
  10 -12   1   11.80    9.70
  10 -12   1   14.40   13.20
 -10 -12  -1   -5.60   14.20
  10 -12   1   42.20   16.10
 -10  12  -1   -7.40   15.10
  10  12   1   22.40   13.40
 -10  12  -1    1.60   15.10
 -10 -13   1   -8.40   15.90
  10 -13  -1  -14.80   11.20
  10 -13  -1    0.40    7.60
  10 -13  -1  -15.10   13.30
 -10  13   1   13.90   13.70
  10  13  -1   28.50   12.10
   9 -13  -1   61.69   10.00
   9 -13  -1   51.59   14.40
  -9 -13   1   55.79   19.80
   9 -13  -1   64.59   15.20
   9  13  -1   72.89   13.70
  -9  13   1   68.99   16.00
  -9  13   1   35.20   14.10
   8 -13  -1   29.10   12.40
  -8 -13   1   13.70   13.30
   8 -13  -1   22.20   11.40
   8 -13  -1   29.00    8.30
  -8  13   1   14.90   10.70
   8  13  -1   32.80    9.60
  -8  13   1    4.40    9.40
   7 -13  -1   -0.90    7.50
   7 -13  -1    9.30    9.90
   7 -13  -1    4.30    6.50
  -7 -13   1    5.70   11.10
   7 -13  -1   -3.00    9.30
   7  13  -1   -0.50    7.00
  -7  13   1    6.80    9.00
  -7  13   1   18.40    9.20
   6 -13  -1    5.30    8.00
  -6 -13   1    5.70   10.30
   6 -13  -1   -2.00    8.60
   6 -13  -1    1.60    5.90
   6 -13  -1    9.90    7.60
   6  13  -1    1.40    6.00
  -6  13   1   -6.20    6.90
  -6  13   1   -1.00    7.20
   5 -13  -1  415.76   20.40
   5 -13  -1  425.56   22.00
   5 -13  -1  414.86   18.70
  -5 -13   1  394.06   25.00
   5 -13  -1  420.66   24.10
  -5  13   1  414.56   21.40
   5  13  -1  416.46   19.80
  -5  13   1  416.06   18.60
  -4 -13   1   50.49   11.90
   4 -13  -1   57.29    8.00
   4 -13  -1   47.70    9.40
  -4 -13   1   63.49    6.20
   4 -13  -1   58.19    9.70
   4  13  -1   64.09    8.80
  -4  13   1   46.20    8.60
  -4  13   1   54.59    7.80
   4  13  -1   55.99    5.70
   4  13  -1   63.29    9.90
   3 -13  -1 1121.69   32.60
   3 -13  -1 1066.59   37.20
   3 -13  -1 1145.79   34.30
   3 -13  -1 1130.09   34.70
  -3 -13   1 1126.39   38.60
  -3 -13   1 1106.49   29.80
  -3  13   1 1132.29   34.60
   3  13  -1 1080.29   27.30
   3  13  -1 1118.79   34.30
   3  13  -1 1120.59   27.50
  -3  13   1 1087.89   30.30
   3  13  -1 1087.99   34.00
  -2 -13   1    7.40    6.70
  -2 -13   1   13.40    4.90
  -2 -13   1    0.80    4.50
   2 -13  -1    7.10    6.80
   2 -13  -1   14.00    6.00
   2 -13  -1   -3.10    4.40
   2  13  -1    5.50    5.00
  -2  13   1    4.40    3.70
  -2  13   1   15.80    5.30
  -2  13   1   12.20    5.40
   2  13  -1    6.90    3.00
   2  13  -1    4.50    4.40
  -2  13   1   10.60    4.70
   1 -13  -1   64.09    8.80
   1 -13  -1   74.19    8.50
  -1 -13   1   86.59   10.20
  -1 -13   1   93.49    9.20
  -1 -13   1   74.09    8.40
   1 -13  -1   92.99    8.40
   1 -13  -1   84.29   10.30
   1  13  -1   82.39    6.10
   1  13  -1   87.59    8.40
  -1  13   1   90.89    8.90
   1  13  -1   80.69    9.20
  -1  13   1   91.19    9.10
  -1  13   1   86.99    8.80
  -1  13   1   91.09    7.00
   0 -13  -1    8.80    5.30
   0 -13   1   10.70    5.50
   0 -13   1    6.10    5.20
   0 -13  -1   13.00    5.70
   0 -13   1    8.30    4.80
   0 -13  -1    9.80    5.60
   0  13   1    9.10    5.10
   0  13   1    5.20    4.70
   0  13   1    2.50    4.10
   0  13  -1    8.10    5.00
   0  13  -1   13.80    4.90
   0  13  -1    2.50    3.80
   0  13  -1    4.00    4.30
  -1 -13  -1   62.29    7.40
   1 -13   1   68.99    7.20
   1 -13   1   55.19    8.60
   1 -13   1   60.89    6.20
  -1 -13  -1   56.49    7.70
  -1 -13  -1   68.49    9.60
   1 -13   1   56.39    7.70
   1  13   1   58.99    6.40
  -1  13  -1   64.69    7.70
  -1  13  -1   58.49    7.20
   1  13   1   59.29    7.80
   1  13   1   66.69    8.10
  -1  13  -1   70.09    8.20
   2 -13   1  173.38   11.90
  -2 -13  -1  152.38    9.10
   2 -13   1  157.48   11.00
  -2 -13  -1  158.58   11.70
   2 -13   1  164.08   11.40
   2 -13   1  145.49   13.20
  -2 -13  -1  156.98   13.90
  -2  13  -1  156.58   10.60
   2  13   1  159.78   11.40
  -2  13  -1  142.09   10.90
  -2  13  -1  163.08   10.70
   2  13   1  167.68   11.90
   2  13   1  180.58    9.30
   3 -13   1  645.64   23.30
  -3 -13  -1  683.13   23.40
   3 -13   1  657.53   23.20
  -3 -13  -1  644.24   28.80
   3 -13   1  683.73   27.80
   3 -13   1  641.14   23.90
  -3  13  -1  665.63   23.20
   3  13   1  703.33   25.50
   3  13   1  662.93   24.80
   3  13   1  649.34   20.50
  -3  13  -1  625.34   24.50
   3  13   1  690.23   21.10
   4 -13   1   15.70    6.30
   4 -13   1   18.70    6.70
   4 -13   1    8.30    7.30
  -4 -13  -1   25.30   10.40
   4 -13   1   11.50    9.70
   4  13   1   19.70    7.00
   4  13   1   16.90    5.80
  -4  13  -1   10.70    7.00
  -4  13  -1   19.00    7.60
   4  13   1   25.30    8.30
   4  13   1   21.00    5.60
   5 -13   1  248.48   15.40
  -5 -13  -1  233.78   21.00
   5 -13   1  237.48   17.90
   5 -13   1  251.47   14.90
   5 -13   1  249.48   19.80
   5  13   1  216.38   13.80
  -5  13  -1  271.07   17.00
   5  13   1  251.17   14.00
   5  13   1  264.77   17.00
  -5  13  -1  252.97   17.90
  -6 -13  -1   -7.90   10.20
   6 -13   1   12.30   10.20
   6 -13   1    4.60    6.20
   6 -13   1   12.60    7.00
   6 -13   1   -4.20    8.00
   6  13   1    2.20    7.10
  -6  13  -1   19.50    9.00
  -6  13  -1    1.10    7.90
   6  13   1   -0.60    6.40
  -7 -13  -1   -1.70   12.00
   7 -13   1    6.10   10.30
   7 -13   1   -1.50    9.20
   7 -13   1    9.90    7.20
  -7  13  -1   29.80   10.70
  -7  13  -1   17.90   10.40
   7  13   1   20.70    9.20
   8 -13   1   28.00   12.20
   8 -13   1    8.70    7.60
  -8 -13  -1    8.00   13.80
   8 -13   1   13.50   10.80
  -8  13  -1   14.00   11.80
  -8  13  -1   31.10   11.90
   8  13   1   13.00    9.60
  -9 -13  -1    5.30   15.40
   9 -13   1    4.00   12.00
   9 -13   1   10.40    8.80
   9 -13   1   20.50   13.20
  -9  13  -1   19.60   14.00
  -9  13  -1    7.90   11.80
   9  13   1    8.20   10.90
  10 -13   1  125.49   21.10
  10 -13   1  122.49   14.60
 -10 -13  -1  100.99   24.30
  10 -13   1   95.29   19.50
 -10  13  -1  169.28   23.80
  10  13   1  142.29   20.00
 -10  13  -1  152.08   24.10
  10 -14  -1   30.20   15.00
  10 -14  -1    6.40   13.70
  10 -14  -1   20.40    9.20
 -10 -14   1   11.30   16.70
  10  14  -1   28.30   13.10
 -10  14   1    5.90   14.60
   9 -14  -1   14.90   11.40
  -9 -14   1    4.90   15.30
   9 -14  -1   23.70   13.40
   9 -14  -1    9.50    8.40
  -9  14   1    5.90   11.70
   9  14  -1   -9.20   10.30
  -8 -14   1   20.10   12.70
   8 -14  -1    1.30   10.20
   8 -14  -1    4.70    7.40
   8 -14  -1   -5.40    9.60
   8  14  -1    2.20    8.80
  -8  14   1  -12.90    8.80
  -8  14   1    5.80    9.60
   7 -14  -1    4.60    7.60
  -7 -14   1    0.20   11.30
   7 -14  -1  -11.50    9.30
   7 -14  -1   -2.40    6.60
   7 -14  -1   23.80   10.80
  -7  14   1    7.30    8.70
  -7  14   1   -8.50    7.70
   7  14  -1    6.50    7.30
   6 -14  -1  224.88   19.10
   6 -14  -1  283.77   16.50
   6 -14  -1  226.38   20.20
   6 -14  -1  247.78   17.60
  -6 -14   1  239.88   25.00
  -6  14   1  247.88   16.80
   6  14  -1  232.48   16.80
  -6  14   1  251.27   19.30
   5 -14  -1  105.99   12.90
   5 -14  -1  115.99   15.50
   5 -14  -1  102.29   10.80
  -5 -14   1   98.99   16.60
   5 -14  -1  115.49   14.20
  -5  14   1  100.79   12.60
   5  14  -1  112.19   12.10
  -5  14   1  101.39   11.40
   4 -14  -1 1091.09   33.40
   4 -14  -1 1074.59   35.40
   4 -14  -1 1145.79   36.00
  -4 -14   1 1043.50   28.60
  -4 -14   1 1034.20   40.00
  -4  14   1 1006.10   30.90
  -4  14   1 1100.99   36.10
   4  14  -1  995.80   27.10
   4  14  -1 1093.79   36.30
   4  14  -1 1133.39   35.40
   3 -14  -1    3.70    6.00
   3 -14  -1    6.20    7.80
  -3 -14   1   -0.10    4.50
  -3 -14   1   -2.20    7.40
   3 -14  -1   -6.50    5.60
   3 -14  -1   -3.20    5.10
   3  14  -1    5.70    5.10
   3  14  -1    3.60    5.70
   3  14  -1    3.30    3.20
  -3  14   1    4.50    5.70
  -3  14   1    7.20    4.70
  -2 -14   1  359.66   16.30
  -2 -14   1  364.46   14.90
   2 -14  -1  379.96   19.30
  -2 -14   1  330.27   18.40
   2 -14  -1  335.17   11.80
   2 -14  -1  363.46   17.90
   2  14  -1  356.06   16.50
  -2  14   1  351.06   16.80
   2  14  -1  358.76   11.70
  -2  14   1  364.26   16.20
  -2  14   1  373.06   17.20
   2  14  -1  385.06   17.60
  -2  14   1  338.37   13.50
  -1 -14   1    4.80    5.40
   1 -14  -1   -0.70    5.30
  -1 -14   1    5.90    4.80
   1 -14  -1    1.10    4.50
  -1 -14   1  -10.30    4.20
   1 -14  -1    2.60    6.30
   1 -14  -1    5.30    4.70
   1  14  -1    4.70    4.40
  -1  14   1    1.80    4.10
  -1  14   1   -2.20    3.60
   1  14  -1    3.00    3.20
  -1  14   1   -1.10    4.20
   1  14  -1    2.00    4.40
  -1  14   1   -0.70    4.20
   0 -14  -1   62.99    8.50
   0 -14   1   67.69    8.70
   0 -14  -1   68.59    9.30
   0 -14   1   53.79    7.90
   0 -14   1   54.89    8.50
   0 -14  -1   65.09    8.60
   0  14  -1   71.39    7.00
   0  14  -1   77.09    9.00
   0  14   1   69.49    8.60
   0  14   1   49.60    7.20
   0  14  -1   81.19    8.40
   0  14   1   59.49    7.10
   0  14  -1   53.09    7.60
   1 -14   1   39.10    5.80
   1 -14   1   22.00    7.10
   1 -14   1   29.30    6.60
   1 -14   1   25.80    5.40
  -1 -14  -1   34.40    6.80
  -1 -14  -1   22.30    6.10
  -1 -14  -1   31.00    7.90
  -1  14  -1   30.30    6.10
  -1  14  -1   30.10    6.30
  -1  14  -1   27.40    5.90
   1  14   1   29.40    5.30
   1  14   1   30.60    6.30
   1  14   1   41.00    6.90
   2 -14   1  603.14   21.30
  -2 -14  -1  591.44   22.20
   2 -14   1  560.54   22.00
  -2 -14  -1  583.84   19.10
   2 -14   1  613.44   25.00
  -2 -14  -1  600.84   25.90
   2 -14   1  626.14   22.40
  -2  14  -1  535.65   20.00
   2  14   1  610.54   23.40
  -2  14  -1  556.04   21.80
   2  14   1  596.64   18.70
   2  14   1  557.04   21.70
  -2  14  -1  571.14   21.50
   3 -14   1    1.30    7.40
   3 -14   1   -0.70    5.50
   3 -14   1   -0.70    5.20
  -3 -14  -1    6.10    8.10
   3 -14   1   -4.10    5.70
  -3 -14  -1   -5.90    5.50
  -3  14  -1   -2.20    5.40
   3  14   1    4.00    5.80
   3  14   1    1.80    4.40
   3  14   1   -3.30    5.00
   3  14   1    5.00    4.30
  -3  14  -1   -4.50    5.80
   4 -14   1  529.95   21.50
   4 -14   1  497.55   22.40
  -4 -14  -1  508.15   28.00
   4 -14   1  485.85   25.60
   4 -14   1  515.05   21.20
  -4  14  -1  453.55   20.60
  -4  14  -1  466.45   22.20
   4  14   1  498.15   18.80
   4  14   1  463.85   23.10
   4  14   1  505.85   22.90
   4  14   1  513.95   18.60
  -5 -14  -1    0.20   10.30
   5 -14   1    0.30    8.20
   5 -14   1    0.90    9.00
   5 -14   1   -0.30    6.10
   5 -14   1   -9.80    5.60
   5  14   1    7.70    6.70
   5  14   1    3.10    5.60
  -5  14  -1    0.50    7.40
  -5  14  -1   -2.90    6.70
   5  14   1   13.70    6.40
  -6 -14  -1   31.10   14.00
   6 -14   1   85.09   10.60
   6 -14   1   43.20    9.50
   6 -14   1   66.89   14.10
   6 -14   1   49.30   12.00
   6  14   1   56.49   10.90
  -6  14  -1   46.50   10.90
   6  14   1   69.29    9.90
  -6  14  -1   41.30   11.00
   7 -14   1   21.20   11.70
   7 -14   1   16.20    8.00
   7 -14   1   37.70   11.90
  -7 -14  -1   15.60   13.10
  -7  14  -1    8.50    9.70
  -7  14  -1   29.10   10.60
   7  14   1   27.10   10.20
   8 -14   1   20.80    8.90
  -8 -14  -1    5.90   14.10
   8 -14   1   11.30   12.20
   8 -14   1   26.40   11.80
   8  14   1   24.90   11.10
  -8  14  -1   -5.30    9.70
  -8  14  -1    6.30   11.80
  -9 -14  -1  146.59   24.40
   9 -14   1  105.79   14.00
   9 -14   1  135.29   21.40
   9 -14   1  108.39   18.70
  -9  14  -1  126.19   19.80
   9  14   1  157.08   19.40
  -9  14  -1  116.49   19.70
 -10 -14  -1    8.50   16.90
  10 -14   1   -2.30    9.40
  10 -14   1   -0.60   14.50
  10 -14   1   -6.20   14.20
  10  14   1   26.40   14.80
 -10  14  -1  -12.70   15.10
 -10  14  -1   -2.20   15.80
 -10 -15   1    7.60   17.60
  10 -15  -1   27.20   16.20
  10 -15  -1    9.30    8.90
  10 -15  -1   -0.90   14.10
 -10  15   1   11.70   14.30
  10  15  -1   11.20   12.90
  -9 -15   1    0.10   14.20
   9 -15  -1    3.80    8.50
   9 -15  -1    8.90   13.50
   9 -15  -1   24.70   13.80
  -9  15   1   14.90   12.60
   9  15  -1  -17.00   10.60
   8 -15  -1   14.50   11.60
  -8 -15   1   12.00   13.50
   8 -15  -1   10.40    8.50
   8 -15  -1    8.80   10.90
   8  15  -1   15.50   10.10
  -8  15   1    1.40   10.10
   7 -15  -1   36.70   12.70
  -7 -15   1   42.90   15.60
   7 -15  -1   73.19   14.20
   7 -15  -1   55.69   10.00
   7 -15  -1   35.00    9.80
  -7  15   1   44.20   11.30
  -7  15   1   63.29   13.10
   7  15  -1   65.89   11.90
   6 -15  -1   93.79   12.50
   6 -15  -1   77.59   13.40
   6 -15  -1   61.69    9.70
   6 -15  -1   77.59   14.10
  -6 -15   1   81.39   16.00
  -6  15   1   88.19   13.30
  -6  15   1   58.79   11.00
   6  15  -1   66.39   11.40
  -5 -15   1   11.90   10.50
   5 -15  -1   13.80    7.20
   5 -15  -1   22.00    9.20
   5 -15  -1    6.60    9.00
   5 -15  -1    9.50    7.80
  -5  15   1    9.10    7.90
  -5  15   1    0.30    6.70
   5  15  -1   13.70    7.30
   4 -15  -1    4.30    7.30
  -4 -15   1   -9.10    9.00
   4 -15  -1   -4.30    7.00
   4 -15  -1    7.20    5.70
  -4 -15   1   -0.10    4.80
   4  15  -1   -4.70    6.80
  -4  15   1    4.30    5.80
  -4  15   1   12.70    7.10
   4  15  -1   -7.20    5.40
   4  15  -1   -0.60    3.60
   3 -15  -1    4.10    7.90
   3 -15  -1    8.00    6.60
  -3 -15   1    8.30    5.50
  -3 -15   1   20.20    9.50
   3 -15  -1   12.20    6.20
   3 -15  -1    1.60    6.70
   3  15  -1   14.60    6.20
  -3  15   1   10.60    6.30
  -3  15   1    8.60    4.80
  -3  15   1    9.10    7.20
   3  15  -1    9.90    3.60
   3  15  -1    9.70    6.70
   2 -15  -1   23.00    7.70
   2 -15  -1   21.10    6.50
   2 -15  -1   13.80    4.00
   2 -15  -1   19.70    8.40
  -2 -15   1   33.90    6.60
  -2 -15   1   16.50    6.00
  -2 -15   1   26.20    8.80
  -2  15   1    9.30    5.40
   2  15  -1   19.50    6.30
  -2  15   1   18.90    5.20
   2  15  -1   17.20    6.20
  -2  15   1   21.50    6.70
  -2  15   1   14.30    6.30
   2  15  -1   22.70    3.90
   1 -15  -1  200.28   11.80
   1 -15  -1  212.68   14.20
  -1 -15   1  182.68   12.10
  -1 -15   1  182.78   14.40
   1 -15  -1  212.08   14.90
  -1 -15   1  204.38   13.30
   1 -15  -1  204.78   13.60
  -1  15   1  219.18   13.20
   1  15  -1  208.98   13.50
  -1  15   1  197.38   12.90
   1  15  -1  191.98    9.20
   1  15  -1  192.08   12.40
  -1  15   1  193.18   12.10
  -1  15   1  186.58   10.50
   0 -15   1   10.90    6.40
   0 -15   1    9.60    5.40
   0 -15  -1    1.70    6.10
   0 -15  -1   10.30    5.60
   0 -15   1   15.20    5.60
   0 -15  -1   12.40    6.20
   0  15   1    5.10    5.10
   0  15  -1   16.10    5.50
   0  15   1   15.20    5.90
   0  15  -1   14.80    4.80
   0  15   1    8.00    5.00
   0  15  -1    3.40    4.80
   0  15  -1   14.40    5.50
  -1 -15  -1  165.78   13.40
  -1 -15  -1  143.49   11.00
   1 -15   1  168.68   13.60
   1 -15   1  137.19    9.40
   1 -15   1  149.39    9.80
  -1 -15  -1  153.88   12.30
  -1  15  -1  128.39   10.80
  -1  15  -1  162.78   10.90
   1  15   1  128.99   11.80
   1  15   1  151.58    9.60
   1  15   1  161.38   11.50
  -1  15  -1  156.98   11.80
  -1  15  -1  137.59   10.70
  -2 -15  -1  424.36   19.50
   2 -15   1  437.86   18.70
   2 -15   1  401.16   21.40
   2 -15   1  420.36   17.80
  -2 -15  -1  415.16   21.70
   2 -15   1  404.86   19.20
  -2 -15  -1  387.56   15.80
   2  15   1  401.36   18.50
  -2  15  -1  409.96   17.00
   2  15   1  437.96   15.50
   2  15   1  435.76   20.10
  -2  15  -1  416.96   18.30
  -2  15  -1  417.66   18.70
  -3 -15  -1   55.59   12.40
   3 -15   1   46.90   11.00
   3 -15   1   58.39    9.80
   3 -15   1   65.39    9.10
   3 -15   1   52.19    9.20
   3  15   1   62.69    9.80
   3  15   1   68.29    7.30
   3  15   1   64.39    7.40
   3  15   1   63.79    9.60
  -3  15  -1   50.59    8.10
  -3  15  -1   54.99    9.40
   4 -15   1  125.49   13.80
   4 -15   1  128.29   12.30
  -4 -15  -1  145.69   18.60
   4 -15   1  135.39   12.80
   4 -15   1  142.89   17.00
   4  15   1  120.59   14.20
  -4  15  -1  126.99   12.50
  -4  15  -1  118.09   13.50
   4  15   1  125.19   10.00
   4  15   1  141.29   10.80
   4  15   1  133.69   13.70
   5 -15   1   17.20    9.10
  -5 -15  -1    6.40   10.90
   5 -15   1   10.30    6.90
   5 -15   1    7.50    6.90
   5 -15   1   36.10   11.90
  -5  15  -1   12.00    8.60
   5  15   1    1.50    6.10
  -5  15  -1   12.30    8.10
   5  15   1    9.40    7.70
   5  15   1   27.30    7.50
   6 -15   1   82.99   14.20
   6 -15   1   90.49   11.80
  -6 -15  -1   71.79   16.30
   6 -15   1   95.39   16.20
   6 -15   1   91.19   11.80
   6  15   1   92.99   11.70
  -6  15  -1   86.29   12.80
   6  15   1   82.69   12.80
  -6  15  -1   92.59   14.20
   7 -15   1   31.00    9.20
   7 -15   1   17.50   11.60
   7 -15   1   39.80   12.30
  -7 -15  -1   55.99   16.50
  -7  15  -1   24.00   11.00
   7  15   1   45.80   11.60
  -7  15  -1   36.90   11.40
  -8 -15  -1   85.09   20.60
   8 -15   1   79.09   12.60
   8 -15   1   95.59   17.20
   8 -15   1   75.69   16.60
  -8  15  -1   94.99   16.40
   8  15   1  113.69   17.10
  -8  15  -1   88.09   16.00
   9 -15   1   21.30   14.00
   9 -15   1   25.90   10.40
  -9 -15  -1   30.90   18.10
   9 -15   1    0.80   13.20
  -9  15  -1   50.29   15.90
  -9  15  -1   41.90   14.20
   9  15   1   40.50   13.80
   9 -16  -1   17.90    8.60
  -9 -16   1   -2.70   15.20
   9 -16  -1   13.40   13.20
   9 -16  -1   -4.90   12.30
   9  16  -1    4.40   12.10
  -9  16   1    0.90   12.00
  -8 -16   1   26.10   15.60
   8 -16  -1    9.20   11.70
   8 -16  -1   -0.60   11.90
   8 -16  -1   12.90    8.60
   8  16  -1    7.70   10.60
  -8  16   1    4.60    9.50
   7 -16  -1   71.59   11.10
   7 -16  -1   62.99   12.20
  -7 -16   1   58.89   17.40
   7 -16  -1   70.79   15.10
   7 -16  -1   58.29   14.70
  -7  16   1   75.49   13.20
   7  16  -1   93.89   13.80
  -7  16   1   68.49   13.20
  -6 -16   1  541.55   32.90
   6 -16  -1  592.14   25.00
   6 -16  -1  521.65   30.70
   6 -16  -1  559.84   28.00
   6 -16  -1  498.45   25.70
  -6  16   1  543.25   27.40
  -6  16   1  542.45   23.90
   6  16  -1  562.74   26.60
   5 -16  -1    2.60    7.90
   5 -16  -1    8.40    8.40
   5 -16  -1    8.10    7.10
  -5 -16   1   14.80   10.70
   5 -16  -1    1.00    9.20
  -5  16   1    6.90    6.90
  -5  16   1    1.20    7.40
   5  16  -1    0.60    7.00
   4 -16  -1  616.74   25.70
   4 -16  -1  608.84   24.00
  -4 -16   1  498.95   29.00
  -4 -16   1  552.04   19.00
   4 -16  -1  567.54   26.10
   4  16  -1  563.54   25.00
  -4  16   1  581.94   20.70
  -4  16   1  594.94   25.40
   4  16  -1  571.04   25.80
  -3 -16   1  156.68   17.40
   3 -16  -1  128.49   15.50
  -3 -16   1  132.69   10.70
   3 -16  -1  133.89   12.90
   3 -16  -1  131.09   13.90
   3 -16  -1  140.49   13.20
  -3  16   1  155.88   14.50
   3  16  -1  151.58   14.30
  -3  16   1  154.58   12.90
  -3  16   1  148.09   10.40
   3  16  -1  139.09    7.20
   3  16  -1  171.98   14.50
  -2 -16   1  130.89   14.80
   2 -16  -1   94.29   12.30
  -2 -16   1  110.69   10.30
   2 -16  -1  100.19    7.80
   2 -16  -1  105.79   11.70
   2 -16  -1  108.19   13.10
  -2 -16   1  114.69   11.00
  -2  16   1  138.79   12.40
  -2  16   1  102.89   10.80
   2  16  -1  113.29    7.00
  -2  16   1  100.39    8.70
   2  16  -1  117.19   12.00
  -2  16   1  125.59   12.10
   2  16  -1  124.19   12.50
  -1 -16   1   89.39   10.50
  -1 -16   1   74.79   10.70
  -1 -16   1   58.89    8.90
   1 -16  -1   58.69    9.50
   1 -16  -1   66.29    9.40
   1 -16  -1   79.99   11.20
   1 -16  -1   68.49    9.10
   1  16  -1   75.69    9.40
  -1  16   1   60.19    7.40
  -1  16   1   63.69    8.80
  -1  16   1   70.59    9.20
   1  16  -1   68.39    9.60
  -1  16   1   71.89    9.00
   1  16  -1   74.69    7.10
   0 -16  -1   12.00    5.90
   0 -16   1    6.50    6.10
   0 -16  -1    5.90    6.10
   0 -16   1    7.10    5.90
   0 -16   1    6.50    6.40
   0 -16  -1   -5.00    6.30
   0  16   1    3.80    5.30
   0  16  -1    6.10    5.40
   0  16   1    6.20    5.80
   0  16   1    6.10    4.90
   0  16  -1    3.70    4.30
   0  16  -1   -5.90    4.80
   0  16  -1    0.30    5.00
   1 -16   1   36.10    6.20
  -1 -16  -1   56.29    8.80
  -1 -16  -1   33.60    9.20
  -1 -16  -1   54.79    8.60
   1 -16   1   33.10    9.10
   1  16   1   48.60    8.30
  -1  16  -1   60.19    8.10
  -1  16  -1   47.20    8.00
  -1  16  -1   48.00    7.70
   1  16   1   44.50    6.80
  -1  16  -1   57.59    8.50
   1  16   1   54.59    8.80
  -2 -16  -1  128.89   10.20
   2 -16   1  135.89   12.80
   2 -16   1  162.48   12.20
   2 -16   1  146.99   13.20
   2 -16   1  145.39   15.50
  -2 -16  -1  168.48   16.60
  -2 -16  -1  139.79   13.10
  -2  16  -1  148.59   12.00
   2  16   1  140.19   12.50
  -2  16  -1  132.09   12.90
  -2  16  -1  155.98   11.30
   2  16   1  159.78    9.90
   2  16   1  160.28   13.70
   3 -16   1  644.04   28.80
  -3 -16  -1  665.93   31.10
   3 -16   1  643.24   25.60
   3 -16   1  645.24   24.90
   3 -16   1  664.53   25.60
   3  16   1  624.64   21.10
  -3  16  -1  622.14   25.80
   3  16   1  602.34   20.60
  -3  16  -1  655.33   23.80
   3  16   1  674.83   26.80
   3  16   1  616.14   26.80
   4 -16   1  483.85   22.20
   4 -16   1  531.05   28.40
   4 -16   1  495.45   23.40
  -4 -16  -1  474.45   28.00
   4 -16   1  534.45   22.70
   4  16   1  482.45   24.20
   4  16   1  485.15   18.80
  -4  16  -1  508.25   21.80
   4  16   1  501.55   19.30
   4  16   1  457.95   23.90
  -4  16  -1  477.15   23.70
   5 -16   1   53.89   13.20
  -5 -16  -1   35.10   13.70
   5 -16   1   51.99    9.90
   5 -16   1   55.79   11.60
   5 -16   1   39.30    9.50
   5  16   1   33.90    8.00
  -5  16  -1   52.19   11.10
   5  16   1   45.40    8.50
  -5  16  -1   45.70   10.90
   5  16   1   45.90    9.90
   6 -16   1    3.50    7.50
   6 -16   1   15.20   10.50
   6 -16   1    5.50    8.20
  -6 -16  -1  -13.30    9.80
   6 -16   1   15.00   10.80
  -6  16  -1    1.50    9.20
   6  16   1    3.90    8.50
  -6  16  -1   -1.20    7.60
  -7 -16  -1   62.79   17.70
   7 -16   1   36.60   13.30
   7 -16   1   69.69   11.80
   7 -16   1   72.79   14.80
  -7  16  -1   54.29   13.40
  -7  16  -1   50.09   13.60
   7  16   1   64.99   13.70
  -8 -16  -1   25.90   18.10
   8 -16   1   18.00    9.60
   8 -16   1   32.10   14.10
   8 -16   1   11.60   11.90
  -8  16  -1   23.60   12.80
   8  16   1   22.80   12.30
  -8  16  -1    9.80   11.40
   9 -16   1   29.00   16.00
  -9 -16  -1   43.00   19.40
   9 -16   1   36.80   16.40
   9 -16   1   40.80   12.10
   9  16   1   25.40   13.90
  -9  16  -1   51.79   16.20
  -9  16  -1   60.49   16.70
   9 -17  -1    5.20   10.10
   9 -17  -1    0.30   13.50
  -9 -17   1   -6.80   17.00
   9 -17  -1   13.40   13.90
  -9  17   1   11.20   11.60
   9  17  -1    6.50   13.00
  -8 -17   1  -14.50   13.90
   8 -17  -1   11.30   12.70
   8 -17  -1  -16.00   10.00
   8 -17  -1    1.90    8.20
  -8  17   1   19.50   10.80
   8  17  -1  -13.50   10.00
   7 -17  -1    1.90    8.10
   7 -17  -1   13.30   10.70
   7 -17  -1   15.50   12.00
  -7 -17   1    8.60   12.60
   7  17  -1    4.40    9.90
  -7  17   1   -3.00    9.10
   6 -17  -1    1.30    9.90
   6 -17  -1    9.90    9.60
   6 -17  -1   -6.90    8.20
  -6 -17   1   13.10   12.10
   6 -17  -1    2.00    7.40
  -6  17   1    1.90    8.10
  -6  17   1    9.60    9.10
   6  17  -1  -18.60    7.20
   5 -17  -1  565.04   26.10
  -5 -17   1  549.54   31.40
   5 -17  -1  519.65   29.60
   5 -17  -1  544.45   23.90
   5 -17  -1  574.04   27.50
  -5  17   1  546.95   26.40
  -5  17   1  570.84   22.50
   5  17  -1  524.45   25.60
   4 -17  -1   40.40    9.00
   4 -17  -1   46.80   10.40
   4 -17  -1   33.60   10.10
  -4 -17   1   23.60   11.10
   4  17  -1   26.60    8.80
  -4  17   1   47.30    9.80
  -4  17   1   44.30   10.50
   4  17  -1   50.29   10.50
  -4  17   1   35.80    7.60
   3 -17  -1   25.40   10.90
  -3 -17   1   37.00    7.70
   3 -17  -1   62.29   11.10
  -3 -17   1   29.00   11.00
  -3  17   1   39.60    7.10
   3  17  -1   32.00    4.80
  -3  17   1   44.30    9.50
   3  17  -1   46.10    9.30
   3  17  -1   33.10    8.90
  -3  17   1   41.40    9.10
  -2 -17   1  191.68   14.50
   2 -17  -1  187.08   16.20
   2 -17  -1  176.08    9.70
   2 -17  -1  174.98   17.20
   2 -17  -1  176.38   14.90
  -2 -17   1  191.58   13.00
  -2 -17   1  198.48   16.90
   2  17  -1  177.68    8.80
   2  17  -1  190.48   15.10
  -2  17   1  197.98   14.00
  -2  17   1  176.08   10.90
   2  17  -1  195.38   14.40
  -2  17   1  198.08   14.20
   1 -17  -1   65.39   10.90
  -1 -17   1   88.49   10.70
  -1 -17   1   87.29   10.50
   1 -17  -1   58.29    8.80
  -1 -17   1   70.99   11.10
   1 -17  -1   81.69   11.90
   1 -17  -1   70.49   10.00
  -1  17   1   67.89    8.00
   1  17  -1   75.39   10.00
  -1  17   1   52.69    8.90
   1  17  -1   67.69   10.30
   1  17  -1   74.69    6.90
  -1  17   1   78.89   10.40
  -1  17   1   55.39    8.90
   0 -17   1  116.69   13.00
   0 -17  -1  115.19   13.60
   0 -17  -1  107.49   11.60
   0 -17   1  119.99   12.10
   0 -17  -1  105.39   11.90
   0 -17   1  121.29   11.80
   0 -17  -1  125.99   13.10
   0  17  -1  107.89   11.00
   0  17  -1  111.89   11.30
   0  17   1   94.99   11.10
   0  17   1  119.39   10.00
   0  17  -1  107.79    9.00
   0  17  -1  110.09   11.70
   0  17   1  109.89   11.60
  -1 -17  -1   86.49   12.00
   1 -17   1   89.39   12.30
   1 -17   1   89.39    8.70
  -1 -17  -1   66.19    9.80
  -1 -17  -1   93.79   10.70
   1 -17   1   84.29   10.60
   1  17   1   85.49    8.50
  -1  17  -1   89.49    9.80
  -1  17  -1   86.99   10.10
   1  17   1   72.49   10.80
  -1  17  -1   93.59   10.50
   1  17   1   84.49   10.30
  -1  17  -1   83.69   10.70
  -2 -17  -1   10.30    9.10
  -2 -17  -1   12.30    6.50
   2 -17   1   15.60    7.90
   2 -17   1    2.10    8.60
  -2 -17  -1   14.30    7.70
   2 -17   1   12.60    7.10
   2 -17   1   14.40    7.60
  -2  17  -1   11.90    6.90
  -2  17  -1   10.30    6.50
  -2  17  -1    2.30    6.30
   2  17   1   29.50    8.10
   2  17   1    9.20    5.40
   2  17   1   17.40    7.90
   3 -17   1   16.60    9.80
   3 -17   1   13.00    7.10
  -3 -17  -1   15.60   10.90
   3 -17   1   -2.60    7.20
   3 -17   1   -3.10    7.00
   3  17   1    5.90    7.50
   3  17   1    4.20    5.30
  -3  17  -1    1.90    5.90
  -3  17  -1   17.00    7.20
   3  17   1    0.40    7.00
   3  17   1    7.80    5.90
   4 -17   1   55.29   10.40
  -4 -17  -1   59.99   13.90
   4 -17   1   58.99   13.40
   4 -17   1   59.09   10.00
   4 -17   1   83.69   12.40
   4  17   1   56.69    7.90
  -4  17  -1   49.30   10.80
   4  17   1   46.70   11.00
   4  17   1   72.59    8.80
   4  17   1   55.69   10.80
  -4  17  -1   68.79   10.40
   5 -17   1  223.98   23.20
   5 -17   1  202.58   17.10
   5 -17   1  226.88   16.30
  -5 -17  -1  261.67   25.90
   5 -17   1  225.88   19.80
   5  17   1  237.48   19.10
   5  17   1  215.68   15.20
  -5  17  -1  222.78   16.50
  -5  17  -1  240.08   18.80
   6 -17   1   13.50   10.80
   6 -17   1   35.90    9.50
   6 -17   1   41.60   10.20
  -6 -17  -1   25.80   13.80
  -6  17  -1   19.30   10.00
  -6  17  -1   36.20   10.70
   6  17   1   32.50   10.50
  -7 -17  -1   12.40   14.90
   7 -17   1   -0.90   11.40
   7 -17   1  -13.30   10.10
   7 -17   1    1.40    8.60
  -7  17  -1    7.20    9.40
   7  17   1    0.30   10.40
  -7  17  -1    6.70   10.80
   8 -17   1   35.10   11.30
   8 -17   1   20.50   14.00
   8 -17   1   19.40   12.90
  -8 -17  -1   -1.00   15.80
   8  17   1   38.10   14.30
  -8  17  -1   -4.20   12.20
  -8  17  -1   20.80   12.30
  -9 -17  -1   14.70   17.30
   9 -17   1  -17.60   12.30
   9 -17   1  -12.10   14.40
   9 -17   1   11.60   11.40
   9  17   1   11.10   13.60
  -9  17  -1   -3.50   13.10
   9 -18  -1   18.80   10.60
  -9 -18   1  -13.90   16.90
   9 -18  -1   48.60   16.80
   9 -18  -1   34.70   16.20
   9  18  -1   14.30   13.80
  -9  18   1    0.60   13.10
  -8 -18   1  -11.70   14.20
   8 -18  -1   -9.90   11.70
   8 -18  -1  -14.40   11.20
   8 -18  -1    9.50    9.40
  -8  18   1   13.20   11.50
   8  18  -1    9.10   11.00
   7 -18  -1  217.18   22.20
  -7 -18   1  250.07   28.20
   7 -18  -1  221.88   17.50
   7 -18  -1  155.68   21.80
   7  18  -1  236.68   21.90
  -7  18   1  189.28   20.50
   6 -18  -1   -9.30    9.80
  -6 -18   1   -4.30   11.70
   6 -18  -1  -10.70    8.80
   6 -18  -1   -8.90    9.60
   6 -18  -1   -0.30    7.40
  -6  18   1   19.50    9.90
   6  18  -1    1.50    8.80
  -5 -18   1   12.30   12.40
   5 -18  -1   14.40    8.80
   5 -18  -1   28.20    9.10
   5 -18  -1   21.80    9.80
   5 -18  -1   26.20   10.70
   5  18  -1   12.70    9.70
  -5  18   1   13.20    6.70
  -5  18   1   14.10    8.80
   5  18  -1    8.60    8.30
   4 -18  -1   -4.90    7.70
   4 -18  -1   23.70    9.70
   4 -18  -1    6.70    8.60
  -4 -18   1    5.00   10.00
   4 -18  -1    9.00    8.20
   4  18  -1    4.90    7.90
  -4  18   1   13.10    6.40
  -4  18   1    4.90    6.90
  -4  18   1   17.30    8.30
   4  18  -1   11.50    8.30
   3 -18  -1   19.20    9.20
  -3 -18   1    5.10    6.40
  -3 -18   1   24.90   10.20
   3 -18  -1   11.50    7.30
  -3  18   1   12.20    5.90
  -3  18   1   -1.40    6.70
   3  18  -1    8.70    7.00
  -3  18   1   11.10    7.80
   3  18  -1    8.00    7.50
   2 -18  -1  132.49    9.40
   2 -18  -1  142.49   14.10
  -2 -18   1  135.89   16.40
   2 -18  -1  137.39   16.20
   2 -18  -1  141.39   15.20
  -2 -18   1  156.28   12.60
  -2  18   1  118.09   12.60
   2  18  -1  164.18   14.90
  -2  18   1  164.78   10.50
  -2  18   1  148.49   14.00
   2  18  -1  136.69    8.30
   2  18  -1  141.39   13.90
  -1 -18   1  548.55   24.40
  -1 -18   1  546.65   23.40
   1 -18  -1  551.14   21.20
   1 -18  -1  503.55   24.70
   1 -18  -1  568.94   25.90
   1 -18  -1  570.24   24.70
  -1 -18   1  573.34   23.70
  -1  18   1  522.85   19.90
   1  18  -1  561.24   24.60
  -1  18   1  552.24   22.90
  -1  18   1  547.85   21.80
   1  18  -1  551.24   18.00
   1  18  -1  508.15   22.40
  -1  18   1  496.65   23.20
   0 -18   1    4.30    6.70
   0 -18   1   -7.70    7.40
   0 -18  -1    0.30    6.90
   0 -18  -1   -3.20    7.70
   0 -18  -1   -0.50    7.20
   0 -18  -1   -3.00    7.30
   0 -18   1    4.00    6.70
   0  18   1   -4.20    5.70
   0  18  -1   -0.50    5.90
   0  18   1    2.20    5.80
   0  18  -1    2.10    6.30
   0  18   1    5.80    5.70
   0  18  -1   -0.60    4.90
   0  18  -1   -1.90    6.30
   1 -18   1  857.21   32.70
   1 -18   1  848.12   30.70
   1 -18   1  785.62   25.60
  -1 -18  -1  800.42   30.90
  -1 -18  -1  804.92   28.70
  -1 -18  -1  856.21   30.90
   1  18   1  823.32   25.90
  -1  18  -1  795.72   29.80
   1  18   1  829.42   29.60
  -1  18  -1  815.12   29.40
  -1  18  -1  866.41   28.10
   1  18   1  826.32   31.70
  -1  18  -1  816.42   27.50
   2 -18   1  134.29   13.90
  -2 -18  -1  133.39   16.40
   2 -18   1  130.39   16.10
  -2 -18  -1  131.89   11.70
   2 -18   1  141.89   12.70
   2 -18   1  160.28   14.40
  -2  18  -1  147.49   13.70
   2  18   1  135.19   14.60
   2  18   1  120.29    9.80
   2  18   1  115.39   12.90
  -2  18  -1  144.89   11.80
  -2  18  -1  132.29   13.20
  -3 -18  -1  103.59   16.20
   3 -18   1   84.09   14.50
   3 -18   1   79.99   11.50
   3 -18   1  102.29   12.40
   3 -18   1  109.19   13.10
  -3  18  -1  101.49   12.20
   3  18   1   80.39   12.20
   3  18   1   93.19    9.30
  -3  18  -1  107.59   11.20
   3  18   1  104.59   13.70
   3  18   1   91.39    9.90
  -4 -18  -1   25.90   11.70
   4 -18   1   35.30   10.30
   4 -18   1   25.50   12.10
   4 -18   1   26.70    8.80
   4 -18   1   22.70    8.70
   4  18   1   25.50    9.90
  -4  18  -1   54.89   10.90
   4  18   1   30.60    9.70
   4  18   1   24.00    7.00
   4  18   1   23.00    7.30
  -4  18  -1   17.30    8.00
   5 -18   1   31.90   13.00
   5 -18   1   30.90   10.50
   5 -18   1   18.10    8.80
   5 -18   1   28.00   10.20
  -5 -18  -1   46.10   14.80
   5  18   1   38.60   11.00
  -5  18  -1   18.40    9.50
  -5  18  -1   24.30    9.30
   6 -18   1    4.90   10.20
   6 -18   1    1.60    7.30
  -6 -18  -1   -2.10   12.00
   6 -18   1   12.50    8.70
   6  18   1  -12.40    9.10
  -6  18  -1    6.10    9.50
  -6  18  -1    2.90    9.50
  -7 -18  -1    8.10   14.90
   7 -18   1    9.50    9.50
   7 -18   1   -4.90   11.50
   7 -18   1   11.40   12.00
  -7  18  -1    1.90   10.60
  -7  18  -1   16.10   11.50
   7  18   1   13.60   11.50
   8 -18   1   -5.20   11.20
   8 -18   1    1.90   13.90
   8 -18   1    1.20    9.50
  -8 -18  -1    0.90   15.00
   8  18   1   25.40   13.10
  -8  18  -1    6.00   11.30
  -8  18  -1  -14.20   11.70
   9 -18   1   45.90   13.60
   9 -18   1   77.89   19.40
  -9 -18  -1   82.69   22.50
   9 -18   1   65.39   20.00
  -9  18  -1   77.39   16.70
   9  18   1   56.89   16.90
   9 -19  -1   59.29   18.90
   9 -19  -1   84.59   14.50
   9 -19  -1   53.79   18.50
  -9 -19   1   58.09   22.70
   9  19  -1   90.39   19.10
  -9  19   1   48.40   16.50
   8 -19  -1   23.70   15.60
   8 -19  -1   85.39   13.30
   8 -19  -1   47.90   15.60
  -8 -19   1   68.89   21.10
   8  19  -1   60.29   15.40
  -8  19   1   26.50   14.00
   7 -19  -1  151.48   16.60
  -7 -19   1  164.08   24.90
   7 -19  -1  197.98   19.30
   7 -19  -1  192.98   22.10
   7 -19  -1  117.19   20.90
  -7  19   1  154.98   19.30
   7  19  -1  201.78   21.50
   6 -19  -1   53.79   12.70
   6 -19  -1   40.90   12.60
  -6 -19   1   48.50   15.90
   6 -19  -1   31.80   13.60
   6 -19  -1   55.99   11.90
   6  19  -1   58.09   13.00
  -6  19   1   48.70   12.50
   5 -19  -1  314.97   24.70
   5 -19  -1  328.27   21.90
   5 -19  -1  297.27   20.80
  -5 -19   1  275.07   24.40
   5 -19  -1  294.07   19.70
  -5  19   1  298.77   17.00
  -5  19   1  299.17   21.20
   5  19  -1  316.17   22.20
  -5  19   1  295.57   20.10
   5  19  -1  325.07   22.00
   4 -19  -1   75.39   14.20
   4 -19  -1   71.39   12.50
  -4 -19   1   58.39   15.10
  -4  19   1   77.29    9.60
   4  19  -1   89.39   13.80
  -4  19   1   92.99   13.30
   4  19  -1   76.29   12.40
  -4  19   1   67.19   11.40
   3 -19  -1  105.19   13.70
  -3 -19   1   80.39   10.70
  -3 -19   1   89.59   15.80
   3 -19  -1   99.89   12.90
  -3  19   1   79.79   12.30
   3  19  -1   86.29   13.10
   3  19  -1   77.89   12.40
  -3  19   1   79.39    9.40
  -3  19   1   79.39   11.40
   2 -19  -1  400.36   21.70
   2 -19  -1  370.86   21.40
   2 -19  -1  425.36   24.40
  -2 -19   1  362.36   18.90
  -2 -19   1  358.26   22.70
   2  19  -1  357.46   21.10
   2  19  -1  371.96   19.90
  -2  19   1  360.26   16.30
  -2  19   1  363.86   19.60
  -2  19   1  392.26   19.90
   2  19  -1  363.26   13.70
   1 -19  -1   76.59   11.70
  -1 -19   1   89.09   11.60
   1 -19  -1  103.99   14.20
  -1 -19   1  108.89   13.70
   1 -19  -1   92.79   10.60
  -1 -19   1   94.39   12.50
   1 -19  -1   97.79   13.20
   1  19  -1   96.69    7.90
   1  19  -1   65.49   10.90
  -1  19   1   77.99   11.30
   1  19  -1   99.39   11.80
  -1  19   1   89.19   11.00
  -1  19   1   91.69   11.00
   0 -19   1  299.47   17.80
   0 -19   1  343.57   20.40
   0 -19  -1  361.76   21.40
   0 -19   1  369.36   20.20
   0 -19  -1  366.16   19.10
   0 -19  -1  316.67   19.40
   0 -19  -1  360.26   21.10
   0  19  -1  391.26   20.80
   0  19  -1  351.06   18.00
   0  19  -1  368.56   18.80
   0  19   1  368.66   19.00
   0  19   1  320.87   19.60
   0  19   1  356.86   16.50
   0  19  -1  349.57   15.70
   1 -19   1  365.06   21.90
   1 -19   1  401.26   21.60
  -1 -19  -1  377.46   19.50
  -1 -19  -1  393.56   21.20
   1 -19   1  357.66   16.00
  -1 -19  -1  392.86   21.40
  -1  19  -1  356.96   19.30
  -1  19  -1  363.56   20.00
  -1  19  -1  362.76   17.40
   1  19   1  390.96   21.80
  -1  19  -1  377.26   18.10
   1  19   1  390.46   19.90
   1  19   1  401.16   16.40
  -2 -19  -1  177.38   19.30
   2 -19   1  176.28   18.40
   2 -19   1  174.58   16.10
  -2 -19  -1  188.98   13.60
  -2  19  -1  180.38   14.70
  -2  19  -1  195.68   14.00
   2  19   1  183.98   15.10
   2  19   1  161.28   16.30
  -2  19  -1  199.98   14.40
   2  19   1  161.68   11.20
   3 -19   1  116.59   13.60
   3 -19   1  112.29   16.40
  -3 -19  -1  121.39   17.60
   3 -19   1  109.39   13.80
   3 -19   1  121.19   13.50
  -3  19  -1  104.69   11.70
   3  19   1   93.59   13.00
   3  19   1  107.29    9.70
   3  19   1  117.29   10.40
  -3  19  -1   96.09   13.00
   3  19   1  115.49   13.90
   4 -19   1    3.50    9.00
   4 -19   1    3.20    7.90
   4 -19   1   10.60   11.10
   4 -19   1   15.90    8.20
  -4 -19  -1    4.80    9.70
   4  19   1    9.30    8.70
  -4  19  -1    5.50    7.70
   4  19   1    7.00    8.50
  -4  19  -1    5.40    7.40
   5 -19   1  105.89   18.90
   5 -19   1   82.89   13.60
   5 -19   1  115.69   14.60
  -5 -19  -1  121.59   19.10
   5 -19   1  130.09   16.70
   5  19   1  111.29   15.80
   5  19   1   99.49   15.00
  -5  19  -1  102.89   12.60
  -5  19  -1  118.49   15.50
   6 -19   1   39.10   10.50
  -6 -19  -1   37.10   15.10
   6 -19   1   17.50    9.90
   6 -19   1   41.10   14.00
  -6  19  -1   15.30   10.60
   6  19   1   16.30   12.70
  -6  19  -1   18.60   11.20
   7 -19   1    4.30   12.10
   7 -19   1    8.80   12.10
  -7 -19  -1    8.90   16.10
   7 -19   1   10.60    9.90
  -7  19  -1    3.50   10.80
  -7  19  -1   22.50   12.50
   7  19   1   33.60   13.80
   8 -19   1   17.40   14.40
  -8 -19  -1   27.90   19.00
   8 -19   1   30.60   15.40
   8 -19   1   29.40   12.00
  -8  19  -1   16.30   13.30
   8  19   1   15.20   13.50
   9 -19   1    5.20   16.20
   9 -19   1   -8.10   16.10
   9 -19   1   -8.20   11.30
  -9 -19  -1    4.80   18.50
  -9  19  -1   15.00   15.10
   9  19   1    1.40   14.70
   8 -20  -1   -8.10   13.40
   8 -20  -1  -17.70   12.70
  -8 -20   1   -2.40   16.20
   8 -20  -1  -12.90   10.40
   8  20  -1    9.40   12.90
  -8  20   1   10.80   12.20
   7 -20  -1   10.50   13.30
  -7 -20   1   10.10   15.10
   7 -20  -1  -15.60   11.00
   7 -20  -1   -3.10   10.00
   7 -20  -1   17.00   11.40
   7  20  -1    1.20   10.70
  -7  20   1   -0.30   10.10
  -7  20   1   -4.20   10.90
   6 -20  -1  169.58   20.00
   6 -20  -1  152.88   20.60
   6 -20  -1  161.58   17.00
   6 -20  -1  176.48   19.20
  -6 -20   1  139.69   22.40
   6  20  -1  164.58   19.10
  -6  20   1  153.18   18.00
  -6  20   1  152.88   19.40
  -5 -20   1   76.69   16.20
   5 -20  -1   63.09   15.30
   5 -20  -1   54.89   13.40
   5 -20  -1   50.29   12.80
   5  20  -1   55.19   12.90
   5  20  -1   62.89   13.60
  -5  20   1   58.79   12.00
  -5  20   1   56.89   11.70
   4 -20  -1   28.10    9.40
   4 -20  -1   -2.20   10.00
  -4 -20   1   25.10   12.60
   4 -20  -1   22.30   10.80
  -4  20   1    8.50    8.90
  -4  20   1   13.30    7.50
   4  20  -1   14.80    9.20
   4  20  -1   28.40    9.70
  -4  20   1    8.30    9.10
   3 -20  -1   76.29   12.70
   3 -20  -1   72.49   12.40
  -3 -20   1  105.69   16.30
  -3 -20   1   91.29   11.50
  -3  20   1  105.89   13.70
   3  20  -1   80.99   12.30
  -3  20   1   78.29   12.10
  -3  20   1   91.09    9.80
   3  20  -1   79.19   13.10
  -2 -20   1    1.70    9.20
   2 -20  -1   10.60   10.00
   2 -20  -1    3.80    8.10
   2 -20  -1    9.90    7.70
  -2 -20   1   15.90    8.10
   2  20  -1   -1.70    7.00
  -2  20   1    4.70    7.30
  -2  20   1    1.70    6.00
  -2  20   1   11.10    7.70
   2  20  -1    2.20    7.40
   1 -20  -1    9.20    8.40
   1 -20  -1   11.70    9.80
   1 -20  -1   24.80    9.50
   1 -20  -1   30.30    7.70
  -1 -20   1    9.40    9.10
  -1 -20   1    7.00    8.90
  -1 -20   1    7.90    8.20
  -1  20   1   12.50    7.80
   1  20  -1   21.30    7.90
   1  20  -1    7.90    7.00
  -1  20   1   24.30    8.30
   1  20  -1    9.60    5.00
   0 -20  -1   66.49   11.30
   0 -20  -1   61.99   11.70
   0 -20   1   60.09   10.80
   0 -20  -1   43.90   11.30
   0 -20   1   63.49   10.10
   0 -20  -1   41.80   10.90
   0 -20   1   61.19   12.10
   0  20  -1   70.89    8.20
   0  20   1   70.99    9.30
   0  20   1   60.99   10.30
   0  20  -1   65.59   11.30
   0  20  -1   59.59    9.90
   0  20  -1   64.19    9.90
   0  20   1   61.89   11.40
   1 -20   1   96.89   13.00
   1 -20   1   94.69   14.90
   1 -20   1   81.49    9.20
  -1 -20  -1   99.79   13.70
  -1 -20  -1   68.29   11.70
  -1 -20  -1   93.59   12.20
   1 -20   1   87.59   13.30
   1  20   1   92.79    9.70
   1  20   1   78.49   11.70
  -1  20  -1   88.59   10.40
   1  20   1   90.79   12.80
  -1  20  -1   82.49   10.90
  -1  20  -1   74.49   10.80
  -2 -20  -1    5.00    9.90
   2 -20   1    0.20    9.00
   2 -20   1    4.90    8.10
   2 -20   1    7.90    7.90
  -2  20  -1    9.20    7.80
   2  20   1    5.20    7.90
   2  20   1   12.50    8.20
  -2  20  -1    2.40    6.60
   2  20   1   14.10    6.10
  -2  20  -1    4.40    7.10
   3 -20   1   79.09   12.70
   3 -20   1   55.99   11.00
  -3 -20  -1   57.29   14.50
   3 -20   1   69.19   11.50
   3 -20   1   61.59   14.50
   3  20   1   74.39   12.30
   3  20   1   71.29   12.80
  -3  20  -1   58.49   11.20
   3  20   1   74.19    8.70
  -3  20  -1   61.29   11.50
  -3  20  -1   72.39   10.40
   3  20   1   64.79    8.60
   4 -20   1   75.79   16.30
   4 -20   1  104.09   14.40
   4 -20   1   83.49   12.70
   4 -20   1   88.29   13.40
  -4 -20  -1  106.09   19.20
  -4  20  -1   85.29   11.20
  -4  20  -1  100.89   12.90
   4  20   1   67.99   12.70
   4  20   1   80.39   13.60
   5 -20   1  509.25   27.20
  -5 -20  -1  427.36   30.70
   5 -20   1  492.25   25.10
   5 -20   1  436.86   29.60
   5 -20   1  436.76   24.90
  -5  20  -1  480.25   26.60
   5  20   1  508.95   28.50
   5  20   1  446.26   27.30
  -5  20  -1  528.45   24.20
   6 -20   1   73.99   13.40
   6 -20   1   69.29   15.10
  -6 -20  -1   59.39   18.70
   6 -20   1   54.69   12.40
  -6  20  -1   61.89   13.90
  -6  20  -1   56.99   12.50
   6  20   1   58.29   15.70
   7 -20   1  163.88   18.10
   7 -20   1  174.08   21.40
  -7 -20  -1  128.49   23.70
   7 -20   1  113.19   19.60
  -7  20  -1  129.79   18.50
   7  20   1  152.78   20.70
   8 -20   1   11.20   11.90
   8 -20   1   46.00   15.10
   8 -20   1   51.09   16.50
  -8 -20  -1    0.20   16.90
   8  20   1   37.30   15.30
  -8  20  -1   21.00   14.30
  -8 -21   1   75.69   22.70
   8 -21  -1  114.19   22.00
   8 -21  -1  127.29   17.90
   8 -21  -1  132.49   21.90
  -8  21   1  103.69   19.50
  -8  21   1  138.19   20.30
   8  21  -1  146.09   20.30
  -7 -21   1    7.00   16.00
   7 -21  -1    5.90   13.50
   7 -21  -1   29.10   12.30
   7 -21  -1    7.00   10.80
   7 -21  -1   -2.20   12.30
  -7  21   1    9.00   11.70
   7  21  -1    9.90   12.60
  -7  21   1   13.30   12.30
   6 -21  -1   30.20   12.70
   6 -21  -1   16.60   12.60
   6 -21  -1   26.70   12.30
  -6 -21   1   16.30   15.50
  -6  21   1   28.10   11.60
  -6  21   1   24.20   11.10
   6  21  -1   -2.00   11.10
  -5 -21   1   51.99   16.40
   5 -21  -1   19.00   11.10
   5 -21  -1   49.80   14.40
  -5  21   1   39.70   11.50
   5  21  -1   56.39   13.10
   5  21  -1   42.90   12.50
  -5  21   1   39.70   11.20
  -4 -21   1    5.30   10.60
   4 -21  -1  -10.50    9.00
   4 -21  -1    2.70    8.60
   4 -21  -1  -19.20    9.30
  -4  21   1   -4.70    8.00
   4  21  -1    5.60    8.70
   4  21  -1    8.60    9.90
  -4  21   1   -2.60    8.10
  -3 -21   1   19.70   11.50
   3 -21  -1   -6.10    8.30
   3 -21  -1   12.80    9.10
  -3  21   1    8.90    6.60
  -3  21   1    5.70    7.10
   3  21  -1   24.00    9.80
   3  21  -1    6.10    8.10
  -3  21   1    4.80    8.00
   2 -21  -1  143.89   15.40
   2 -21  -1  175.68   17.50
  -2 -21   1  159.98   15.00
  -2 -21   1  161.48   18.60
  -2  21   1  161.18   15.40
  -2  21   1  149.59   12.30
   2  21  -1  167.78   15.00
   2  21  -1  163.98   17.20
  -2  21   1  178.88   15.70
   1 -21  -1   -5.00    7.90
   1 -21  -1    3.70    7.80
   1 -21  -1   12.70    9.70
  -1 -21   1    3.00    8.50
  -1 -21   1   -4.10    8.50
   1 -21  -1   -9.10    7.10
  -1  21   1    4.20    7.30
   1  21  -1   -1.40    7.20
   1  21  -1    2.40    5.30
  -1  21   1   -0.20    6.10
   1  21  -1    3.50    6.80
   0 -21  -1  707.03   31.10
   0 -21  -1  735.73   31.50
   0 -21  -1  718.63   28.60
   0 -21   1  675.63   27.80
   0 -21  -1  754.72   30.60
   0 -21   1  744.33   31.50
   0 -21   1  752.62   31.30
   0  21  -1  735.03   25.00
   0  21   1  731.63   31.20
   0  21   1  753.02   26.50
   0  21  -1  755.62   31.20
   0  21   1  741.23   29.00
   0  21  -1  720.03   28.50
  -1 -21  -1  203.48   16.20
   1 -21   1  212.98   18.90
  -1 -21  -1  206.88   18.60
   1 -21   1  199.38   19.60
   1 -21   1  213.58   18.00
  -1  21  -1  209.48   14.00
   1  21   1  205.68   12.90
  -1  21  -1  190.18   14.50
  -1  21  -1  162.88   14.40
   1  21   1  211.38   16.70
   1  21   1  163.68   16.40
   2 -21   1  156.68   16.40
  -2 -21  -1  179.68   18.70
   2 -21   1  131.19   15.00
   2 -21   1  169.68   19.00
   2  21   1  168.38   11.60
   2  21   1  161.28   15.60
  -2  21  -1  153.18   14.90
  -2  21  -1  129.59   14.00
  -2  21  -1  138.79   13.50
   2  21   1  151.38   16.90
   3 -21   1    7.20   10.90
   3 -21   1   -2.20    7.60
  -3 -21  -1   -7.20   10.10
  -3  21  -1    0.90    7.30
  -3  21  -1   -1.10    7.60
   3  21   1    4.10    7.90
  -3  21  -1    9.90    7.30
   3  21   1   -3.10    8.70
   4 -21   1   20.60   10.70
   4 -21   1   29.90   10.40
  -4 -21  -1    0.80   12.00
   4 -21   1   12.00   10.00
   4 -21   1   23.90   12.00
  -4  21  -1   14.30    8.50
   4  21   1   12.40   10.20
   4  21   1   12.00    9.50
  -4  21  -1   17.80    9.60
   5 -21   1   26.20   11.30
  -5 -21  -1    5.40   13.30
   5 -21   1   12.90   12.50
   5 -21   1   16.50    9.90
   5 -21   1   41.90   12.60
   5  21   1   15.70   10.40
  -5  21  -1    9.90   10.60
  -5  21  -1   16.40    9.20
   5  21   1   29.60   12.20
  -6 -21  -1   58.49   18.50
   6 -21   1   74.29   15.70
   6 -21   1   65.49   13.40
   6 -21   1   54.49   13.40
  -6  21  -1   62.39   14.50
  -6  21  -1   51.49   11.10
   6  21   1   72.69   17.10
   7 -21   1  182.88   19.40
  -7 -21  -1  168.18   25.90
   7 -21   1  122.69   21.20
   7 -21   1  209.28   23.90
  -7  21  -1  113.39   18.10
   7  21   1  172.28   22.40
  -8 -21  -1  121.59   26.40
   8 -21   1  122.19   21.60
   8 -21   1   94.39   16.60
   8 -21   1  139.49   22.20
  -8  21  -1   99.99   19.40
   8  21   1  100.99   20.20
  -8 -22   1   25.20   18.10
   8 -22  -1   12.60   16.00
   8 -22  -1   -9.20   15.20
   8  22  -1  -13.40   14.60
  -8  22   1   18.90   11.70
  -8  22   1    6.60   12.80
   7 -22  -1   70.29   19.30
   7 -22  -1  125.89   18.20
   7 -22  -1  159.18   21.60
  -7 -22   1  125.39   26.00
  -7  22   1  128.59   18.30
  -7  22   1  123.09   18.30
   7  22  -1  118.59   19.40
   6 -22  -1   27.80   14.80
   6 -22  -1    8.70   12.20
  -6 -22   1   11.00   16.80
  -6  22   1   18.80   11.70
  -6  22   1   29.50   10.30
   6  22  -1   18.40   14.00
   5 -22  -1    9.30   11.20
   5 -22  -1   13.40   12.30
   5 -22  -1   -1.50    9.10
  -5 -22   1   -0.20   13.80
  -5  22   1    0.60   10.00
   5  22  -1    6.60   10.10
  -5  22   1  -12.90    9.10
   5  22  -1   30.50   12.10
   4 -22  -1   85.89   15.70
  -4 -22   1  135.59   20.20
   4 -22  -1  109.29   15.20
   4 -22  -1  105.29   18.10
  -4  22   1  116.89   16.00
   4  22  -1  115.99   16.30
   4  22  -1  101.29   14.90
  -4  22   1   97.19   13.90
   3 -22  -1   43.20   12.90
  -3 -22   1   60.49   15.60
   3 -22  -1   50.19   12.20
   3 -22  -1   47.30   11.90
  -3  22   1   62.79    9.40
   3  22  -1   34.90   11.80
   3  22  -1   56.89   11.90
  -3  22   1   42.70   10.40
  -3  22   1   60.19   11.90
  -2 -22   1  232.58   21.00
  -2 -22   1  213.78   17.60
   2 -22  -1  252.47   20.00
   2 -22  -1  240.98   20.20
  -2  22   1  240.98   17.10
   2  22  -1  246.18   20.40
  -2  22   1  247.88   14.90
   2  22  -1  233.18   17.40
  -2  22   1  259.07   18.20
   1 -22  -1   47.30   12.50
   1 -22  -1   43.20   10.90
  -1 -22   1   53.49   12.00
  -1 -22   1   34.60   11.20
   1 -22  -1   23.00   10.30
  -1  22   1   48.40    9.90
   1  22  -1   46.10    9.60
   1  22  -1   30.10    9.80
  -1  22   1   49.70    9.60
   0 -22  -1   50.29   10.90
   0 -22   1   51.29   12.50
   0 -22  -1   74.39   13.20
   0 -22  -1   68.29   12.60
   0 -22   1   42.50   12.10
   0 -22  -1   56.69   12.10
   0 -22   1   59.69   10.40
   0  22  -1   46.90    7.80
   0  22   1   42.50    9.70
   0  22  -1   56.39   11.90
   0  22  -1   42.10    9.70
   0  22   1   60.59    9.50
   1 -22   1  106.59   15.30
  -1 -22  -1  106.19   16.10
   1 -22   1   93.19   13.60
   1 -22   1  116.49   15.80
   1  22   1  109.69   15.00
   1  22   1   97.29   10.30
  -1  22  -1   85.69   10.50
  -1  22  -1  109.49   13.10
  -1  22  -1  117.49   13.50
   1  22   1  105.59   13.80
   2 -22   1   88.29   14.10
   2 -22   1   88.29   13.80
   2 -22   1   81.49   15.70
  -2 -22  -1  111.59   16.80
  -2  22  -1   99.39   12.60
  -2  22  -1   77.69   10.60
  -2  22  -1  118.29   13.80
   2  22   1   81.19   12.40
   2  22   1   95.79   14.50
   2  22   1  102.09   10.40
   3 -22   1    3.10   11.80
  -3 -22  -1   14.00   11.90
   3 -22   1    2.70    8.80
   3  22   1    4.20    9.60
  -3  22  -1   -3.60    7.40
   3  22   1   -9.80    7.60
  -3  22  -1   -6.70    7.00
  -3  22  -1  -11.50    7.30
   4 -22   1   13.30   13.10
   4 -22   1   19.20   11.30
   4 -22   1   28.10   11.10
  -4 -22  -1   18.80   12.80
   4 -22   1   21.90   10.60
  -4  22  -1   -5.40    8.40
  -4  22  -1   24.40    9.70
   4  22   1   31.30   11.40
  -4  22  -1   19.50   10.10
   4  22   1   31.30   12.20
   5 -22   1  204.58   24.20
   5 -22   1  190.28   19.40
   5 -22   1  168.68   19.20
  -5 -22  -1  195.98   25.50
   5 -22   1  176.38   19.10
  -5  22  -1  189.38   16.30
   5  22   1  173.68   21.20
  -5  22  -1  207.98   18.80
   5  22   1  202.78   22.20
   6 -22   1   11.40   11.00
   6 -22   1   10.30   11.50
  -6 -22  -1    9.20   14.90
   6 -22   1   11.00   11.60
   6 -22   1    6.10   13.80
   6  22   1    2.00   13.40
  -6  22  -1   23.80   12.10
   7 -22   1   15.50   14.60
  -7 -22  -1   21.80   16.70
   7 -22   1   -7.10   14.20
   7 -22   1   23.00   12.20
   7  22   1    7.60   14.20
  -7  22  -1   12.80   12.80
   8 -22   1   -4.70   16.60
   8 -22   1   -4.20   11.50
   8 -22   1   -7.90   12.80
  -8 -22  -1   -7.50   17.50
  -8  22  -1   -9.90   13.10
   8  22   1   -0.10   16.00
   7 -23  -1   16.10   15.70
  -7 -23   1   25.70   18.90
  -7  23   1   19.70   13.10
   7  23  -1   58.19   17.60
  -7  23   1   74.09   14.80
  -6 -23   1   -5.20   15.00
   6 -23  -1    6.80   12.50
   6 -23  -1    6.20   13.10
   6 -23  -1   20.20   11.30
   6  23  -1   14.70   13.70
  -6  23   1    5.60   10.60
  -6  23   1    3.90   11.00
  -5 -23   1   12.40   15.50
   5 -23  -1   31.20   13.40
   5 -23  -1   12.50   10.80
   5 -23  -1   33.80   15.30
  -5  23   1    8.00    9.60
  -5  23   1   11.30   11.10
   5  23  -1   24.10   12.80
   5  23  -1   17.80   11.80
  -4 -23   1   -4.70   12.00
   4 -23  -1   -7.00    9.60
   4 -23  -1   -8.30   10.90
   4 -23  -1    0.70   10.50
   4  23  -1    3.80    9.00
  -4  23   1   -6.30    8.70
   4  23  -1   22.20   11.40
  -4  23   1   10.80    9.30
  -3 -23   1  176.68   21.50
   3 -23  -1  151.88   19.60
   3 -23  -1  148.49   17.40
   3 -23  -1  149.88   17.60
   3  23  -1  135.59   17.80
   3  23  -1  121.69   15.80
  -3  23   1  126.89   15.90
  -3  23   1  141.79   15.70
  -2 -23   1    2.50   10.90
   2 -23  -1   -9.50    8.50
  -2 -23   1   -2.50    8.80
   2 -23  -1    8.00   10.30
   2  23  -1    2.60    9.20
  -2  23   1  -17.00    7.30
   2  23  -1   -1.00    7.50
  -2  23   1   -6.00    7.20
  -1 -23   1   43.90   12.90
   1 -23  -1   66.09   12.50
   1 -23  -1   64.99   12.90
  -1 -23   1   69.19   13.00
  -1  23   1   66.49   10.70
  -1  23   1   46.20   10.50
   1  23  -1   74.09   11.40
   1  23  -1   66.89   14.00
   0 -23   1   15.00   10.10
   0 -23  -1    2.90    9.30
   0 -23   1   -0.20    8.70
   0 -23  -1  -13.10    8.00
   0 -23  -1    1.40    8.70
   0  23   1   10.10    7.80
   0  23   1    9.20    7.10
   0  23  -1   -0.40    6.50
   0  23  -1   -2.20    5.90
   1 -23   1    4.50   10.10
   1 -23   1    9.20    9.40
  -1 -23  -1   -2.20   10.10
  -1 -23  -1  -14.50    9.00
   1 -23   1   24.30   10.40
  -1  23  -1    2.40    7.20
   1  23   1   11.30    9.60
  -1  23  -1    3.90    6.90
   1  23   1    4.30    6.30
   1  23   1   -4.40    7.70
  -1  23  -1    1.10    7.30
   2 -23   1   49.50   15.10
   2 -23   1   24.50   10.80
  -2 -23  -1   35.30   12.10
   2 -23   1   24.00   11.20
  -2  23  -1   15.80    9.40
  -2  23  -1   23.10    9.30
   2  23   1   43.00   10.80
   2  23   1   31.40   11.80
  -2  23  -1   25.70    8.80
  -3 -23  -1  188.88   22.00
   3 -23   1  174.48   22.30
   3 -23   1  188.68   18.90
   3 -23   1  138.09   16.60
  -3  23  -1  196.28   18.50
  -3  23  -1  158.28   16.40
   3  23   1  181.88   20.00
  -3  23  -1  170.48   14.80
   3  23   1  173.78   18.90
   4 -23   1   53.99   16.50
   4 -23   1   39.80   12.50
  -4 -23  -1   33.50   15.60
  -4  23  -1   43.80   11.60
   4  23   1   65.19   14.50
   4  23   1   38.70   12.60
  -4  23  -1   59.89   10.90
  -4  23  -1   61.69   12.30
   5 -23   1  104.59   16.60
  -5 -23  -1  132.59   21.90
   5 -23   1   89.09   18.90
   5 -23   1  118.99   17.00
   5 -23   1  117.99   17.40
  -5  23  -1  113.79   14.90
   5  23   1  116.39   17.70
  -5  23  -1   90.29   15.60
   5  23   1  138.49   20.90
  -5  23  -1   86.39   15.80
  -6 -23  -1   -7.00   14.50
   6 -23   1  -19.80   11.30
   6 -23   1   -4.50   12.50
   6 -23   1    0.70   12.70
   6 -23   1  -16.60   11.30
   6  23   1   26.40   14.70
  -6  23  -1   24.60   11.20
  -7 -23  -1  114.49   24.10
   7 -23   1  111.99   21.60
   7 -23   1  169.98   20.70
   7 -23   1  136.19   22.80
   7  23   1  145.49   23.00
  -7  23  -1  130.79   20.00
   7 -24  -1  185.08   27.40
  -7 -24   1  235.78   30.90
   7 -24  -1  185.38   21.80
   7  24  -1  234.68   26.60
  -7  24   1  209.88   22.70
  -7  24   1  223.18   25.30
   6 -24  -1   -7.40   14.00
   6 -24  -1  -25.40   11.20
  -6 -24   1    2.10   16.60
   6 -24  -1   29.30   14.50
   6  24  -1    0.00   13.60
  -6  24   1  -10.20   11.40
  -6  24   1   -9.20   11.50
  -5 -24   1  -17.90   13.50
   5 -24  -1    3.00   11.00
   5 -24  -1   22.60   13.90
   5 -24  -1   -5.00   11.70
   5  24  -1  -17.00   11.60
  -5  24   1   -1.50   10.70
  -5  24   1    4.80    9.70
   5  24  -1   -7.80   10.30
   4 -24  -1   10.10   11.00
   4 -24  -1   16.20   12.70
   4 -24  -1   33.30   14.10
  -4 -24   1   36.50   15.50
  -4  24   1   31.30   11.70
   4  24  -1   24.00   12.80
   4  24  -1    8.50   11.40
  -4  24   1   14.80    9.90
  -3 -24   1   41.60   15.10
   3 -24  -1   59.59   13.40
   3 -24  -1   28.90   12.80
   3 -24  -1    4.80   13.50
   3  24  -1   26.90   12.00
  -3  24   1   30.10   11.10
   3  24  -1   19.40   10.40
  -3  24   1   33.80   10.40
  -2 -24   1    4.40   11.30
   2 -24  -1   11.40   10.50
   2 -24  -1    7.00   10.00
   2 -24  -1   12.30   10.70
  -2 -24   1    7.50    9.30
   2  24  -1    2.30    9.00
  -2  24   1    3.20    8.50
   2  24  -1    5.20    7.70
  -2  24   1    1.90    9.00
  -1 -24   1  233.88   19.40
   1 -24  -1  179.48   19.30
   1 -24  -1  217.08   21.10
  -1 -24   1  166.08   18.50
  -1  24   1  202.08   15.80
   1  24  -1  187.68   19.30
  -1  24   1  219.58   18.00
   1  24  -1  208.08   17.20
   0 -24   1   66.69   14.70
   0 -24  -1   54.19   13.20
   0 -24  -1   47.40   12.70
   0  24   1   51.49    9.70
   0  24   1   80.69   13.20
   0  24  -1   62.99   11.50
  -1 -24  -1    6.90   10.80
  -1 -24  -1   24.10   12.40
   1 -24   1   26.90   11.30
   1 -24   1   42.70   12.20
   1 -24   1   38.40   13.80
  -1  24  -1   28.90    9.90
   1  24   1   29.80    8.20
  -1  24  -1   32.70    9.60
  -1  24  -1   37.70    9.20
   1  24   1   20.20   10.60
   2 -24   1   -2.00   12.50
   2 -24   1    0.90   10.10
  -2 -24  -1   22.10   12.00
   2 -24   1    5.10    9.90
  -2  24  -1    8.20    8.70
  -2  24  -1   13.70    9.00
   2  24   1    7.60    9.30
  -2  24  -1    2.30    7.60
   2  24   1    6.20   10.20
   3 -24   1   54.99   13.40
   3 -24   1   82.89   17.20
   3 -24   1   77.69   14.50
  -3 -24  -1   74.89   16.40
   3  24   1   83.69   15.70
   3  24   1   67.39   13.80
  -3  24  -1   64.29   11.50
  -3  24  -1   60.99   12.30
  -3  24  -1   81.09   14.10
   4 -24   1   -1.50   12.40
   4 -24   1    5.10   10.70
  -4 -24  -1    6.20   11.60
   4 -24   1   17.50   10.30
  -4  24  -1    1.10    9.40
  -4  24  -1    6.10    9.60
   4  24   1    3.80   10.20
   4  24   1  -21.80   10.60
  -4  24  -1    6.20    9.90
   5 -24   1   60.59   15.10
   5 -24   1   21.30   13.10
  -5 -24  -1   63.49   19.00
   5  24   1   60.79   15.30
  -5  24  -1   44.30   12.80
  -5  24  -1   17.30   12.00
   5  24   1   52.29   17.00
   6 -24   1   71.89   17.10
  -6 -24  -1    7.00   16.20
   6 -24   1   61.39   16.40
   6 -24   1   47.30   18.20
  -6  24  -1   32.00   14.60
  -6  24  -1   41.40   13.50
   6  24   1   50.69   17.60
   7 -24   1  143.09   22.60
   7 -24   1  122.69   19.50
  -7 -24  -1   56.69   21.50
   7 -24   1   95.89   22.60
  -7  24  -1  117.79   18.90
  -7  24  -1  107.79   19.90
   7  24   1   97.99   21.40
  -7 -25   1    9.20   20.80
   7 -25  -1    1.40   17.40
   7 -25  -1   17.60   14.60
   7  25  -1   34.70   17.90
  -7  25   1  -14.50   13.30
  -7  25   1   -2.20   14.40
   6 -25  -1   84.09   18.80
   6 -25  -1   51.59   19.20
   6 -25  -1   45.40   14.60
  -6 -25   1   41.50   19.20
  -6  25   1   46.60   14.20
   6  25  -1   52.69   17.80
  -6  25   1   67.49   17.40
  -5 -25   1    0.00   15.00
   5 -25  -1   31.00   14.70
   5 -25  -1   16.00   13.80
   5 -25  -1   18.80   12.60
   5  25  -1    9.80   15.10
  -5  25   1   24.90   12.60
  -5  25   1   -0.10   10.20
   5  25  -1   27.70   13.00
  -4 -25   1   57.79   17.30
   4 -25  -1   48.40   13.50
   4 -25  -1   41.00   16.20
   4 -25  -1   22.60   13.30
   4  25  -1   74.29   15.10
  -4  25   1   49.40   13.10
   4  25  -1   91.19   17.90
  -4  25   1   68.29   13.70
   3 -25  -1   28.40   12.30
  -3 -25   1   51.29   16.30
   3 -25  -1   13.70   12.70
   3 -25  -1   25.40   12.40
   3  25  -1   56.09   15.10
  -3  25   1   22.30   11.10
   3  25  -1   21.10   11.10
  -3  25   1   45.00   10.80
   2 -25  -1   82.99   15.20
   2 -25  -1  102.29   16.50
   2 -25  -1   77.09   16.20
  -2 -25   1   80.99   16.90
   2  25  -1   93.09   14.10
   2  25  -1   65.99   14.40
  -2  25   1   93.89   14.10
  -2  25   1   75.19   12.60
  -1 -25   1   44.40   11.80
  -1 -25   1   17.10   11.50
   1 -25  -1   11.90   10.20
   1 -25  -1    0.50   11.40
   1 -25  -1   -3.90   10.40
  -1  25   1   11.30    8.60
  -1  25   1   10.40    9.50
   1  25  -1   24.40   10.10
   0 -25   1  114.89   16.40
   0 -25  -1  128.89   16.80
   0 -25   1  104.19   17.00
   0 -25  -1   78.69   15.20
   0  25   1  109.09   11.80
   0  25   1   90.39   13.90
   0  25  -1   82.19   12.80
  -1 -25  -1   12.30   10.30
  -1 -25  -1    3.20   10.80
   1 -25   1   11.70    9.50
   1 -25   1   -0.40   12.60
  -1 -25  -1   12.40   11.40
  -1  25  -1   -0.80    6.50
  -1  25  -1    2.00    8.10
   1  25   1   -5.40    8.20
   2 -25   1    9.30   13.30
  -2 -25  -1  -16.60   11.80
   2 -25   1   16.90   11.30
   2 -25   1   -6.70   10.40
  -2  25  -1    1.40    8.10
   2  25   1    3.70    8.40
  -2  25  -1   -3.70    8.60
   2  25   1   -0.70   10.20
  -2  25  -1   -9.70    8.10
   3 -25   1   38.40   15.60
  -3 -25  -1   37.20   14.50
   3 -25   1   37.30   13.00
   3 -25   1   48.60   14.10
   3  25   1   44.50   12.50
  -3  25  -1   39.40    9.80
   3  25   1   70.09   15.80
  -3  25  -1   55.69   12.40
  -3  25  -1   32.60   11.10
   4 -25   1    2.80   11.40
   4 -25   1   15.10   14.60
  -4 -25  -1    5.90   14.60
   4 -25   1   14.80   12.20
  -4  25  -1   -7.00   10.50
   4  25   1  -12.80   12.90
  -4  25  -1   17.00    9.80
   4  25   1    6.80   11.40
   5 -25   1   61.79   16.20
  -5 -25  -1   82.29   20.90
   5  25   1   99.29   19.70
  -5  25  -1   94.59   17.30
  -5  25  -1   78.39   15.30
   5  25   1   88.59   17.90
  -6 -25  -1   55.09   21.50
   6 -25   1   36.60   18.80
   6  25   1   73.39   19.60
  -6  25  -1   26.60   14.30
  -6  25  -1   80.29   15.60
  -7  25  -1  101.89   18.50
   6 -26  -1   13.40   15.40
  -6 -26   1    2.90   19.70
   6 -26  -1   18.50   14.40
   6 -26  -1    0.80   17.10
  -6  26   1   18.80   13.20
   6  26  -1   37.30   18.30
  -6  26   1   12.00   13.50
  -5 -26   1   11.70   17.40
   5 -26  -1   12.50   15.40
   5 -26  -1   18.30   14.30
   5 -26  -1   25.10   13.60
   5  26  -1   11.40   13.00
  -5  26   1   14.40   11.70
   5  26  -1   38.80   17.20
  -5  26   1    6.80   11.90
  -4 -26   1  -18.70   14.40
   4 -26  -1   38.50   16.60
   4 -26  -1   56.59   15.50
   4 -26  -1   50.39   14.40
  -4  26   1   19.70   11.10
   4  26  -1   43.50   13.00
   4  26  -1   37.80   15.50
  -4  26   1   36.90   13.10
   3 -26  -1  -10.30   11.00
  -3 -26   1  -31.50   12.30
   3 -26  -1   -3.10   10.90
   3 -26  -1   -3.10   11.20
   3  26  -1  -11.40    9.70
  -3  26   1   -3.10    9.90
   3  26  -1  -10.30   10.90
  -3  26   1   -1.20    9.40
  -2 -26   1  208.78   23.20
   2 -26  -1  181.28   23.20
   2 -26  -1  178.18   20.70
   2 -26  -1  203.78   20.90
   2  26  -1  204.88   18.40
   2  26  -1  186.38   22.00
  -2  26   1  154.48   17.30
  -2  26   1  196.78   18.20
  -1 -26   1    4.70   12.50
   1 -26  -1   29.80   12.80
   1 -26  -1   31.90   14.00
  -1  26   1   29.80   10.50
   1  26  -1   46.80   11.70
  -1  26   1   40.10   10.70
   0 -26   1    5.20   12.30
   0 -26  -1    2.70   11.40
   0 -26   1    5.60   10.80
   0 -26  -1    3.90   10.80
   0  26   1   11.80    9.20
   0  26  -1   15.80    9.30
   0  26   1   13.10    8.40
  -1 -26  -1   39.00   12.90
   1 -26   1   15.50   10.90
  -1 -26  -1   30.40   13.10
   1 -26   1   36.50   15.50
   1  26   1   44.90   12.40
  -1  26  -1   16.20    9.50
   2 -26   1    9.00   10.90
  -2 -26  -1  -24.40   11.90
  -2 -26  -1  -13.80   11.40
   2 -26   1   37.20   15.10
   2 -26   1   16.80   11.70
  -2  26  -1  -10.40    8.00
   2  26   1    6.50    9.20
  -2  26  -1   10.80    8.10
  -2  26  -1   10.80   10.10
   3 -26   1   -5.80   12.10
   3 -26   1    3.10   11.10
  -3 -26  -1    9.70   13.70
   3 -26   1  -16.50   14.00
  -3  26  -1   -3.40   10.40
  -3  26  -1   -7.00    9.50
   3  26   1   16.50   11.10
  -3  26  -1    3.90   10.10
   3  26   1  -10.00   12.20
  -4 -26  -1   86.19   20.50
   4 -26   1  117.09   18.60
   4 -26   1  188.98   25.30
   4 -26   1   79.69   16.70
  -4  26  -1   97.69   16.60
   4  26   1  111.69   18.40
   4  26   1  107.89   20.80
  -4  26  -1  128.19   17.60
   5 -26   1   59.29   16.40
  -5 -26  -1   40.30   19.40
   5 -26   1   88.99   17.90
  -5  26  -1   55.19   14.80
  -5  26  -1   33.50   14.00
   5  26   1   55.89   18.80
   5  26   1   66.29   17.40
  -6 -26  -1  129.09   25.70
   6 -26   1   63.19   19.60
   6 -26   1  135.09   18.90
  -6  26  -1   97.99   18.50
   6  26   1  112.69   22.30
  -6  26  -1  145.19   21.00
  -6 -27   1   43.80   22.20
   6 -27  -1   48.90   17.20
   6 -27  -1   36.40   19.20
   6 -27  -1   40.40   16.40
  -6  27   1   23.70   14.20
   6  27  -1   32.20   18.20
  -6  27   1   36.20   14.90
   5 -27  -1   -0.90   12.90
  -5 -27   1  -17.40   17.70
   5 -27  -1   -9.20   13.80
   5 -27  -1   21.10   16.10
   5  27  -1   11.40   15.40
  -5  27   1   -8.60   11.70
   5  27  -1   -0.30   12.30
  -5  27   1   15.10   11.60
  -4 -27   1  -30.20   14.90
   4 -27  -1   10.40   13.20
   4 -27  -1   25.70   16.90
   4 -27  -1  -19.70   12.10
  -4  27   1    8.20   11.60
   4  27  -1    1.60   12.40
  -4  27   1   11.90   11.50
   4  27  -1    1.20   14.00
  -3 -27   1   25.10   15.60
   3 -27  -1  -16.10   12.80
   3 -27  -1    0.30   13.90
   3 -27  -1   -9.10   12.10
   3  27  -1    8.10   13.20
   3  27  -1   -3.50   10.00
  -3  27   1   13.50   10.50
  -3  27   1    4.80   10.20
   2 -27  -1  194.38   20.70
  -2 -27   1  204.88   23.60
   2 -27  -1  195.58   23.30
   2 -27  -1  165.48   21.20
  -2  27   1  173.38   18.30
  -2  27   1  201.38   18.80
   2  27  -1  185.98   18.80
  -1 -27   1   -7.10   11.40
   1 -27  -1  -16.90   10.60
   1 -27  -1   10.20   12.70
  -1  27   1   22.10   10.00
  -1  27   1   -3.00    9.30
   1  27  -1   14.30   10.90
   0 -27  -1  161.38   19.70
   0 -27   1  202.78   22.70
   0 -27   1  187.38   21.50
   0 -27  -1  180.28   20.00
   0  27   1  163.48   17.80
   0  27  -1  150.28   17.00
   1 -27   1   19.20   14.80
   1 -27   1   23.80   12.30
  -1 -27  -1   18.20   11.70
  -1  27  -1    3.50    8.80
   1  27   1   19.80   10.70
   2 -27   1    8.90   12.10
  -2 -27  -1   20.90   14.20
   2 -27   1   15.20   14.40
  -2 -27  -1  -13.70   11.90
   2  27   1   -8.10    9.60
  -2  27  -1   -1.20    9.40
  -2  27  -1   -0.10    9.20
  -2  27  -1    1.10    9.50
  -3 -27  -1   -5.30   13.90
   3 -27   1   20.70   13.10
   3 -27   1   -7.70   11.50
   3 -27   1   -4.70   14.80
   3  27   1   23.30   11.60
  -3  27  -1  -14.70    9.40
  -3  27  -1    2.30   10.50
   4 -27   1  -13.30   12.90
  -4 -27  -1   19.60   16.00
   4 -27   1   -6.30   14.00
  -4  27  -1   10.90   10.80
   4  27   1   10.80   14.70
  -4  27  -1    5.20   11.00
   4  27   1    2.00   12.20
   5 -27   1  -23.10   12.80
  -5 -27  -1   43.50   19.70
   5 -27   1  -11.00   14.00
   5 -27   1   -3.60   14.60
   5  27   1   20.50   17.60
  -5  27  -1   10.40   11.70
  -5  27  -1    9.20   13.50
   5  27   1   -3.70   12.80
   6 -27   1   83.29   19.00
  -6  27  -1   88.39   18.00
   5 -28  -1    3.80   18.70
   5 -28  -1    6.50   14.20
   5 -28  -1   12.60   16.70
  -5 -28   1    5.40   18.70
  -5  28   1   18.50   12.20
  -5  28   1    8.00   12.90
   5  28  -1   17.80   17.00
   5  28  -1   12.20   14.40
   4 -28  -1    0.70   14.20
  -4 -28   1    8.50   16.90
   4 -28  -1  -15.00   14.20
   4 -28  -1   -3.70   13.20
   4  28  -1    9.70   15.00
  -4  28   1   -6.30   11.10
  -4  28   1    2.70   10.70
   4  28  -1    6.70   12.10
   3 -28  -1   74.89   17.50
   3 -28  -1   52.79   15.70
   3 -28  -1   78.29   19.10
  -3 -28   1   61.59   18.00
  -3  28   1   50.79   12.90
   3  28  -1   66.19   15.80
  -3  28   1   53.59   13.60
   2 -28  -1    7.40   13.20
   2 -28  -1   26.10   15.30
  -2  28   1   15.70   11.30
  -2  28   1   18.70   10.50
   2  28  -1    7.40   10.50
  -1 -28   1  125.19   19.40
   1 -28  -1  135.09   20.10
   1 -28  -1  155.58   20.40
   1  28  -1  153.98   18.40
  -1  28   1  147.99   17.90
   0 -28   1   32.60   15.40
   0 -28   1   10.60   11.40
   0 -28  -1   10.50   13.00
   0 -28  -1   31.40   14.00
   0  28  -1   30.90   11.30
   0  28   1   48.50   12.40
   1 -28   1   67.59   17.70
  -1 -28  -1   74.89   16.70
   1 -28   1   69.59   16.10
   1  28   1   78.69   15.60
  -1  28  -1   79.09   14.10
  -2 -28  -1  -10.40   11.70
  -2 -28  -1   15.80   14.90
   2 -28   1    7.20   12.70
   2 -28   1   -4.30   14.90
  -2  28  -1   -4.90    8.90
   2  28   1   -9.70    9.80
  -3 -28  -1   12.60   15.10
   3 -28   1    1.80   13.80
  -3 -28  -1    7.00   16.80
   3 -28   1  -10.70   12.60
   3 -28   1   25.10   16.20
   3  28   1    1.90   11.40
  -3  28  -1   -3.80   10.40
  -3  28  -1   -0.80   10.60
   4 -28   1   42.60   16.20
   4 -28   1   15.60   15.10
  -4 -28  -1   21.30   20.40
  -4  28  -1   21.30   13.20
   4  28   1   17.00   12.90
   4  28   1   47.60   17.90
  -4  28  -1   26.30   14.20
   5 -28   1  -18.40   14.40
   5 -28   1  -12.80   16.20
  -5 -28  -1   -5.50   17.00
   5 -28   1   -8.20   15.20
   5  28   1   15.70   14.20
  -5  28  -1   -5.70   12.00
   5  28   1   -4.90   17.30
  -5  28  -1  -12.10   12.00
   4 -29  -1   13.40   15.70
   4 -29  -1   44.10   18.20
  -4 -29   1   59.99   20.80
   4 -29  -1   28.40   17.70
  -4  29   1   22.70   13.50
   4  29  -1    0.70   17.10
   4  29  -1   62.19   16.50
  -4  29   1   41.00   14.20
   3 -29  -1   77.09   18.80
  -3 -29   1   66.39   19.10
   3 -29  -1   63.39   18.30
   3  29  -1   52.69   15.30
  -3  29   1   53.09   14.30
  -3  29   1   68.09   14.30
   2 -29  -1   76.09   18.70
   2 -29  -1   37.00   16.30
  -2  29   1   79.59   14.10
  -2  29   1   58.39   14.40
   2  29  -1   49.90   13.40
  -1 -29   1   31.10   15.40
   1 -29  -1   17.70   13.30
   1 -29  -1   48.90   17.40
   1  29  -1   82.09   14.70
  -1  29   1   52.59   14.30
   0 -29  -1   36.60   14.40
   0 -29   1   85.79   18.60
   0 -29   1   62.29   15.50
   0  29   1   66.09   15.10
   0  29  -1   69.79   14.30
  -1 -29  -1   -3.20   13.50
   1 -29   1   13.50   15.70
   1 -29   1    8.00   13.00
   1  29   1    4.20   10.90
  -1  29  -1  -10.90    8.80
   2 -29   1   26.50   16.20
   2 -29   1   36.30   15.00
  -2 -29  -1   -3.50   13.10
  -2  29  -1   17.70   10.70
   2  29   1   23.70   12.50
  -3 -29  -1   24.00   17.20
  -3 -29  -1    3.30   15.00
   3 -29   1   -9.20   14.10
   3  29   1   14.20   13.10
  -3  29  -1   13.00   10.60
   4 -29   1   15.40   15.50
  -4 -29  -1  -19.10   18.60
  -4 -29  -1   -8.60   15.30
   4 -29   1   27.90   18.20
   4 -29   1  -17.60   13.80
   4  29   1   -1.80   13.30
  -4  29  -1   -1.20   13.10
  -4  29  -1    4.90   11.90
   4  30  -1   51.59   16.30
  -4  30   1   -0.60   11.70
   3 -30  -1   45.70   18.90
   3 -30  -1   -0.40   15.40
  -3  30   1    6.80   12.20
  -3  30   1   29.60   13.00
   3  30  -1   22.30   13.20
  -2 -30   1   -8.00   13.60
   2 -30  -1   -6.90   15.10
   2 -30  -1   -8.50   14.00
   2  30  -1   -1.40   10.60
  -2  30   1   17.40   12.10
  -1 -30   1  190.28   23.80
   1 -30  -1  214.98   24.10
   1 -30  -1  258.77   26.50
  -1  30   1  230.58   22.50
   1  30  -1  261.47   22.80
   0 -30   1   26.70   14.00
   0 -30   1   41.90   15.70
   0 -30  -1    2.10   13.00
   0  30  -1   35.40   12.80
   0  30   1   33.80   13.10
   1 -30   1   38.20   15.80
  -1 -30  -1   59.69   16.60
   1 -30   1   64.69   17.80
   1  30   1   76.99   15.50
  -1  30  -1   37.90   12.80
  -2 -30  -1   41.20   16.20
   2 -30   1   37.70   15.80
   2  30   1   43.90   15.00
  -2  30  -1   41.70   13.70
   3 -30   1    3.60   14.80
  -3 -30  -1    3.60   15.80
  -3 -30  -1    9.80   17.70
  -3  30  -1    1.10   11.30
   3  30   1   33.30   14.80
   2 -31  -1   -2.90   14.40
   2 -31  -1   15.10   18.40
  -2 -31   1  -23.20   15.10
  -2  31   1   23.10   12.90
   2  31  -1   29.30   13.10
   1 -31  -1   31.90   17.20
   1 -31  -1   36.10   15.90
  -1 -31   1   39.00   15.00
   1  31  -1   33.90   12.60
  -1  31   1   21.00   11.90
   0 -31   1    3.00   14.20
   0 -31  -1   18.10   14.80
   0  31   1    5.80   13.90
   0  31  -1   26.40   12.40
  -1 -31  -1   14.60   15.50
   1 -31   1   -0.50   13.40
  -1  31  -1   -9.00   10.80
   1  31   1   11.50   12.00
  -2 -31  -1  -16.20   15.30
   2 -31   1    1.20   13.80
  -2  31  -1    6.70   11.60
   2  31   1   -5.10   12.10
   0  32  -1   -2.20   11.50
   0  32   1   -2.60   12.30
  11   0  -2   -2.30   11.30
 -11   0   2    2.00   13.60
 -10   0   2  243.08   24.80
 -10   0   2  158.88   22.10
  10   0  -2  242.78   20.40
  -9   0   2   -7.40    9.30
  -9   0   2   15.50   10.20
   9   0  -2   -7.10    7.80
   9   0  -2    2.90    8.10
  -8   0   2   10.20   10.50
  -8   0   2   24.80   10.20
   8   0  -2   24.70    8.60
   8   0  -2   22.40    8.20
  -7   0   2   -3.90    7.60
   7   0  -2   -6.80    5.90
   7   0  -2    5.40    6.00
   7   0  -2    6.10    7.20
   6   0  -2  838.32   28.30
   6   0  -2  865.41   29.30
   6   0  -2  821.12   28.50
   6   0  -2  853.11   28.80
   5   0  -2    0.30    4.40
   5   0  -2   -2.60    4.10
   5   0  -2   -2.90    4.20
   5   0  -2    4.70    4.40
   4   0  -2  142.49    9.50
   4   0  -2  149.49   10.60
   4   0  -2  158.78   10.20
   4   0  -2  157.38   10.70
   3   0  -2   -0.20    3.10
   3   0  -2    5.00    3.70
   3   0  -2   -1.30    3.40
   3   0  -2   -0.90    3.00
   2   0  -2 8652.23  190.18
   2   0  -2 8559.74  188.38
   2   0  -2 8808.92  190.68
   2   0  -2 8803.62  189.78
  -1   0   2    1.70    1.90
   1   0  -2    1.90    2.40
   1   0  -2    3.20    1.90
   1   0  -2   -0.80    2.00
   1   0  -2    1.10    1.60
   1   0  -2    1.40    2.30
   0   0  -2 5506.75  119.99
   0   0  -2 5614.94  121.19
   0   0  -2 5389.36  120.69
   0   0  -2 5595.54  120.49
   0   0   2 5589.34  120.59
   0   0   2 5512.95  120.19
   0   0  -2 5620.34  120.29
  -1   0  -2    2.40    3.10
   1   0   2   -3.40    2.50
   1   0   2    1.90    2.80
   1   0   2   -1.70    2.50
  -1   0  -2   -1.90    2.40
  -1   0  -2   -0.40    2.80
   2   0   2  215.48    9.10
  -2   0  -2  215.38   10.70
   2   0   2  227.48    9.80
  -2   0  -2  234.28    9.90
   2   0   2  235.98    8.60
   2   0   2  217.58   10.00
   2   0   2  221.88    9.00
  -3   0  -2    6.00    4.70
  -3   0  -2    1.10    5.00
   3   0   2   -0.20    4.80
   3   0   2   -0.50    3.90
   3   0   2    1.20    3.50
   4   0   2   91.29    9.70
  -4   0  -2  122.29   12.00
   4   0   2   99.29    7.80
   4   0   2   86.69    8.10
  -5   0  -2   10.60    6.70
   5   0   2   -1.70    3.90
  -5   0  -2   -1.60    5.60
   5   0   2   -0.60    3.40
   6   0   2   30.60    6.30
   6   0   2   22.30    8.80
   6   0   2   30.50    6.30
   6   0   2   38.90    5.80
  -6   0  -2   61.39   10.40
  -6   0  -2   45.10   10.70
  -7   0  -2   -3.10    7.30
  -7   0  -2   -3.20    8.80
   7   0   2   -0.80    7.40
   7   0   2  -11.50    5.10
   7   0   2    2.00    5.50
   8   0   2   31.70    8.30
  -8   0  -2   32.60   11.50
   8   0   2   35.00   10.80
  -8   0  -2   36.70   13.50
   8   0   2   31.40    8.00
   9   0   2   10.10   10.20
   9   0   2  -10.80    7.10
  -9   0  -2   -1.30   10.90
  -9   0  -2   18.00   11.90
 -10   0  -2   -6.30   12.80
  10   0   2   -1.40    8.60
 -10   0  -2  -15.60   12.20
  10   0   2   -3.30   11.10
 -11   0  -2    4.90   14.50
  11   0   2    9.60   13.60
  11   0   2    2.90   10.50
 -11  -1   2   -7.40   12.90
 -11  -1   2  -19.60   13.00
  11  -1  -2    1.10    7.40
  11  -1  -2   -1.40   11.60
 -11   1   2   -6.70   13.60
  11   1  -2   13.40   11.40
 -10  -1   2   51.79   14.90
  10  -1  -2    5.30    9.30
 -10  -1   2   19.60   12.80
 -10   1   2   23.80   12.80
 -10   1   2   11.00   12.40
  10   1  -2   13.70   10.10
   9  -1  -2   45.70    6.10
   9  -1  -2   68.99   12.10
  -9  -1   2   62.09   14.80
   9  -1  -2   79.39   13.40
  -9  -1   2   35.50   13.00
   9   1  -2   52.19   11.10
  -9   1   2   56.09   13.80
   9   1  -2   59.09   10.80
  -9   1   2   51.89   12.80
  -8  -1   2   47.20   12.00
   8  -1  -2   27.80    9.20
   8  -1  -2   32.70    8.40
   8  -1  -2   18.20    8.40
  -8   1   2   40.20   12.00
  -8   1   2   25.10    9.50
   8   1  -2   34.30    9.50
   8   1  -2   26.40    8.70
   7  -1  -2  179.28   13.70
   7  -1  -2  188.48   15.50
  -7  -1   2  201.48   19.40
   7  -1  -2  189.88   15.40
  -7   1   2  204.08   19.00
   7   1  -2  170.28   13.40
   7   1  -2  151.78   13.60
   7   1  -2  184.08   14.40
   6  -1  -2  469.35   21.20
   6  -1  -2  476.05   20.20
   6  -1  -2  482.15   20.70
   6  -1  -2  465.15   20.10
   6   1  -2  473.35   20.20
   6   1  -2  468.15   20.00
   6   1  -2  488.15   20.00
   6   1  -2  533.55   21.70
   5  -1  -2    1.30    4.40
   5  -1  -2   -2.20    3.90
   5  -1  -2    1.70    4.70
   5  -1  -2    1.50    4.70
   5   1  -2   -0.10    4.30
   5   1  -2   -4.30    3.90
   5   1  -2    4.00    4.60
   5   1  -2    3.20    4.60
   4  -1  -2   50.19    7.20
   4  -1  -2   44.60    6.60
   4  -1  -2   41.50    6.30
   4  -1  -2   44.80    6.90
   4   1  -2   44.10    6.90
   4   1  -2   36.10    6.50
   4   1  -2   50.49    6.90
   4   1  -2   50.69    6.30
   3  -1  -2   -1.90    3.40
   3  -1  -2    5.40    3.90
   3  -1  -2    8.80    3.70
   3  -1  -2    5.50    3.60
   3   1  -2    3.50    3.70
   3   1  -2    1.20    3.70
   3   1  -2    3.60    3.20
   3   1  -2    1.40    3.70
   2  -1  -2  876.01   22.60
   2  -1  -2  885.61   24.10
   2  -1  -2  859.11   23.90
   2  -1  -2  899.01   23.00
   2   1  -2  892.61   21.90
   2   1  -2  898.61   23.70
   2   1  -2  865.11   23.40
   2   1  -2  895.51   24.20
   1  -1  -2  223.28    8.80
   1  -1  -2  217.08    6.70
   1  -1  -2  225.78    8.30
  -1  -1   2  237.48    6.90
   1  -1  -2  222.48    8.80
   1  -1  -2  232.68    7.60
   1   1  -2  227.98    8.80
  -1   1   2  233.78    7.90
   1   1  -2  226.58    7.60
  -1   1   2  240.38    6.70
   1   1  -2  227.08    7.00
   1   1  -2  202.58    7.80
   0  -1   2  200.88    7.20
   0  -1  -2  201.68    7.60
   0  -1  -2  208.78    6.60
   0  -1  -2  201.38    7.10
   0  -1   2  207.58    6.70
   0  -1  -2  201.48    6.80
   0  -1  -2  199.78    7.40
   0   1  -2  218.98    7.30
   0   1   2  205.38    5.90
   0   1  -2  214.58    6.80
   0   1   2  193.18    7.30
   0   1   2  205.98    6.90
   0   1  -2  195.08    7.20
   0   1  -2  197.98    7.40
   0   1  -2  205.98    7.00
  -1  -1  -2 1844.22   42.60
  -1  -1  -2 1674.63   43.30
   1  -1   2 1847.12   42.60
  -1  -1  -2 1825.52   40.60
   1  -1   2 1813.82   42.80
   1  -1   2 1821.42   42.90
  -1  -1  -2 1856.41   43.80
   1   1   2 1843.92   42.70
  -1   1  -2 1874.01   42.80
   1   1   2 1889.71   42.90
  -1   1  -2 1842.02   43.70
  -1   1  -2 1843.92   40.00
  -1   1  -2 1815.12   42.50
   1   1   2 1838.32   42.80
   2  -1   2   43.50    4.40
   2  -1   2   54.99    5.30
  -2  -1  -2   48.20    6.00
   2  -1   2   46.20    4.60
   2  -1   2   49.20    5.60
   2  -1   2   53.09    5.80
  -2  -1  -2   46.90    6.10
   2   1   2   53.69    5.60
   2   1   2   42.00    4.50
   2   1   2   46.50    5.50
  -2   1  -2   66.79    6.00
  -2   1  -2   45.90    6.00
   2   1   2   42.10    4.40
   2   1   2   48.60    4.30
   3  -1   2   -1.70    3.80
  -3  -1  -2    3.70    4.70
  -3  -1  -2    9.30    6.00
   3  -1   2   12.00    4.60
   3  -1   2   16.00    5.70
  -3   1  -2    4.50    5.80
   3   1   2    9.50    5.40
  -3   1  -2    9.00    4.70
   3   1   2   10.40    4.00
   3   1   2    5.30    3.70
   4  -1   2 1064.69   28.50
   4  -1   2 1036.60   28.60
   4  -1   2 1078.19   30.10
  -4  -1  -2 1099.29   35.40
  -4  -1  -2 1106.69   33.30
   4  -1   2 1056.49   32.30
   4   1   2 1062.99   28.80
   4   1   2 1042.90   28.80
  -4   1  -2 1065.49   31.70
  -4   1  -2 1038.60   34.50
   4   1   2 1050.99   28.70
   4   1   2 1064.99   32.20
  -5  -1  -2   16.30    7.40
   5  -1   2   30.70    5.00
   5  -1   2   30.20    7.30
   5  -1   2   28.20    5.30
  -5  -1  -2   16.50    7.30
   5   1   2   17.90    5.10
   5   1   2   22.20    7.40
  -5   1  -2   47.70    7.90
   5   1   2   18.20    5.10
  -5   1  -2   59.79   10.10
   5   1   2   24.90    4.90
  -6  -1  -2  379.66   22.70
   6  -1   2  390.66   20.90
   6  -1   2  427.86   17.10
   6  -1   2  405.86   15.80
  -6  -1  -2  423.86   21.50
   6  -1   2  406.86   18.10
  -6   1  -2  412.46   23.60
   6   1   2  388.36   16.70
   6   1   2  407.96   20.70
  -6   1  -2  410.46   20.30
   6   1   2  405.96   17.10
   6   1   2  379.26   15.60
  -7  -1  -2   38.10   10.40
   7  -1   2   36.20    7.50
   7  -1   2   17.50    7.20
  -7  -1  -2   26.10   11.10
   7  -1   2   12.40    8.60
  -7   1  -2   21.90    9.40
   7   1   2   23.00    9.80
   7   1   2   26.30    7.00
   7   1   2   21.30    6.20
  -7   1  -2    9.80    9.70
  -8  -1  -2    3.70    9.60
  -8  -1  -2    6.00    9.80
   8  -1   2    3.50    8.20
   8  -1   2   -8.70    6.00
   8  -1   2    9.60    6.70
   8   1   2   -0.10    6.50
   8   1   2   -4.10    8.50
   8   1   2    2.00    5.60
  -8   1  -2    6.30   10.60
  -8   1  -2   10.30    9.40
  -9  -1  -2   13.40   11.30
  -9  -1  -2   -8.20   10.60
   9  -1   2   22.90   11.30
   9  -1   2   -0.40    7.70
  -9   1  -2   -0.50   11.10
  -9   1  -2   -2.60   11.50
   9   1   2    8.90    7.90
   9   1   2    7.90    9.90
 -10  -1  -2   90.49   20.10
  10  -1   2   74.59   16.10
 -10  -1  -2   78.29   18.30
  10  -1   2   85.79   12.40
  10   1   2   64.39   16.10
 -10   1  -2   64.89   17.20
  10   1   2   81.89   12.30
  11  -1   2   14.00   11.70
 -11  -1  -2   13.70   16.20
  11  -1   2   17.60   15.50
  11   1   2    9.20   13.70
  11   1   2   22.70   11.30
 -11   1  -2   34.00   16.10
 -11  -2   2   88.69   19.70
 -11  -2   2   78.79   19.00
  11  -2  -2   79.59   17.70
  11   2  -2  102.89   10.70
 -11   2   2   51.69   17.30
  11   2  -2   86.79   16.40
 -11   2   2   76.09   19.50
 -10  -2   2  165.68   21.40
  10  -2  -2  119.89   17.00
  10  -2  -2  122.39   17.00
 -10  -2   2  147.99   22.30
 -10   2   2  139.69   21.30
 -10   2   2  142.49   21.80
  10   2  -2  184.08   19.30
   9  -2  -2   44.10   11.30
  -9  -2   2   25.00   11.30
  -9  -2   2   18.80   13.00
   9  -2  -2   21.80   10.00
  -9   2   2   35.20   11.80
   9   2  -2   20.00    8.90
   9   2  -2   24.90    9.60
  -9   2   2   36.80   12.80
   8  -2  -2   28.50    9.30
   8  -2  -2   33.00    9.90
  -8  -2   2   45.50   12.30
   8  -2  -2   35.30    9.00
   8   2  -2   49.30    9.50
  -8   2   2   40.00   11.30
  -8   2   2   46.10   12.50
   8   2  -2   39.90    9.70
   7  -2  -2  147.49   12.70
   7  -2  -2  151.68   15.00
   7  -2  -2  156.18   15.00
  -7  -2   2  151.98   17.90
   7   2  -2  149.39   12.90
  -7   2   2  169.18   16.80
   7   2  -2  156.78   13.10
  -7   2   2  145.29   16.80
   6  -2  -2   97.99   11.40
   6  -2  -2   99.29   10.80
   6  -2  -2   99.99   11.50
   6  -2  -2   85.49   10.00
   6   2  -2   98.99   11.50
   6   2  -2  113.79   11.30
   6   2  -2  108.79   11.00
   6   2  -2   99.19   10.40
   5  -2  -2    5.60    4.60
   5  -2  -2   12.90    5.60
   5  -2  -2   18.00    5.10
   5  -2  -2    9.80    5.40
   5   2  -2   16.50    5.70
   5   2  -2   13.00    5.40
   5   2  -2    5.60    4.60
   5   2  -2    3.80    4.40
   4  -2  -2  221.98   12.60
   4  -2  -2  248.88   11.90
   4  -2  -2  225.48   12.10
   4  -2  -2  256.87   13.50
   4   2  -2  240.28   11.20
   4   2  -2  232.78   11.80
   4   2  -2  275.37   13.30
   4   2  -2  248.28   12.90
   3  -2  -2 1355.06   36.00
   3  -2  -2 1311.77   35.20
   3  -2  -2 1303.77   33.90
   3  -2  -2 1298.27   34.40
   3   2  -2 1334.17   32.90
   3   2  -2 1363.26   35.60
   3   2  -2 1346.87   34.50
   3   2  -2 1400.16   35.90
   2  -2  -2  312.87   11.60
   2  -2  -2  296.77   11.60
   2  -2  -2  304.97   10.20
   2  -2  -2  295.17   10.40
   2   2  -2  278.67   11.00
  -2   2   2  290.97   10.30
   2   2  -2  288.47    8.90
   2   2  -2  324.07   11.70
   1  -2  -2  288.27    8.70
   1  -2  -2  268.87   10.00
   1  -2  -2  281.67    9.60
   1  -2  -2  268.17    8.20
  -1  -2   2  284.07    7.50
   1  -2  -2  281.67   10.20
   1   2  -2  289.37    9.30
  -1   2   2  282.17    8.20
   1   2  -2  275.87    8.50
   1   2  -2  269.77    9.90
   1   2  -2  274.57    9.70
  -1   2   2  278.67    9.50
   0  -2   2  405.06   10.90
   0  -2  -2  389.56   10.70
   0  -2   2  417.26   10.90
   0  -2  -2  409.06   12.60
   0  -2   2  410.36   11.60
   0  -2  -2  397.86   11.80
   0  -2  -2  403.96   11.70
   0  -2  -2  399.16   11.50
   0   2  -2  401.06   11.80
   0   2  -2  390.56   11.00
   0   2   2  407.66   12.00
   0   2  -2  411.96   11.90
   0   2   2  403.86   11.40
   0   2  -2  392.76   10.30
   0   2  -2  393.06   11.30
   0   2  -2  412.56   11.80
   0   2   2  398.86   10.40
  -1  -2  -2  164.68    7.40
   1  -2   2  173.08    7.50
  -1  -2  -2  161.08    6.10
   1  -2   2  171.08    7.80
  -1  -2  -2  153.48    8.30
  -1  -2  -2  165.28    8.10
   1  -2   2  169.98    7.80
   1   2   2  156.68    7.00
  -1   2  -2  174.48    7.20
   1   2   2  170.38    7.30
  -1   2  -2  163.68    7.90
  -1   2  -2  174.58    7.10
   1   2   2  159.58    7.50
  -2  -2  -2   40.20    6.00
   2  -2   2   41.90    4.40
  -2  -2  -2   35.40    4.00
   2  -2   2   29.80    3.80
   2  -2   2   42.10    5.40
   2  -2   2   44.90    5.30
  -2   2  -2   44.30    4.80
   2   2   2   39.10    5.10
   2   2   2   32.90    4.10
   2   2   2   35.70    4.90
  -2   2  -2   33.10    5.40
   2   2   2   36.40    4.30
   2   2   2   39.90    3.60
   3  -2   2  502.85   17.50
   3  -2   2  509.35   16.30
  -3  -2  -2  513.85   19.40
   3  -2   2  485.85   18.70
  -3   2  -2  497.75   17.20
   3   2   2  511.75   16.50
   3   2   2  512.95   18.50
   3   2   2  499.55   14.70
  -3   2  -2  522.65   19.90
   3   2   2  493.45   18.20
   4  -2   2  540.15   18.10
  -4  -2  -2  622.04   22.80
   4  -2   2  544.55   17.80
   4  -2   2  577.44   20.00
  -4  -2  -2  551.64   23.90
   4   2   2  530.35   20.30
   4   2   2  583.04   18.50
   4   2   2  559.34   17.20
  -4   2  -2  549.25   22.80
   4   2   2  558.64   18.20
  -4   2  -2  546.55   19.80
   5  -2   2  790.72   23.70
  -5  -2  -2  756.82   30.80
   5  -2   2  837.42   28.50
   5  -2   2  799.22   26.70
  -5  -2  -2  797.22   29.40
   5  -2   2  795.32   24.10
  -5   2  -2  790.72   26.70
   5   2   2  752.72   23.70
   5   2   2  792.62   23.20
  -5   2  -2  810.22   30.90
   5   2   2  772.42   27.70
   5   2   2  788.02   24.00
  -6  -2  -2   30.10    9.40
   6  -2   2   12.20    4.40
   6  -2   2    2.10    5.30
  -6  -2  -2   38.90   11.00
   6  -2   2    6.00    7.60
   6  -2   2   -1.00    5.50
  -6   2  -2    9.00    6.70
   6   2   2   18.10    4.90
   6   2   2   13.80    5.70
   6   2   2   15.70    5.60
  -6   2  -2    5.90    8.40
   7  -2   2  104.99   12.10
  -7  -2  -2  138.39   16.70
  -7  -2  -2  161.58   19.20
   7  -2   2  124.19   11.60
   7  -2   2  142.09   16.00
   7   2   2  129.59   11.60
   7   2   2  114.39   10.40
  -7   2  -2  115.09   14.50
  -7   2  -2  138.69   17.90
   7   2   2  110.99   13.90
   8  -2   2   55.99   11.80
  -8  -2  -2   70.59   15.50
  -8  -2  -2   41.50   12.60
   8  -2   2   41.10    8.70
   8  -2   2   24.90    9.20
  -8   2  -2   44.80   13.80
  -8   2  -2   57.99   12.30
   8   2   2   37.10   10.40
   8   2   2   59.79   10.00
  -9  -2  -2   45.80   15.20
   9  -2   2   49.40   13.10
   9  -2   2   25.40    9.70
   9  -2   2   33.80    9.00
  -9  -2  -2   36.50   13.20
  -9   2  -2   34.00   14.00
  -9   2  -2   45.70   13.80
   9   2   2   47.40   12.10
   9   2   2   52.29   10.20
 -10  -2  -2   10.40   12.20
  10  -2   2    2.70    8.90
 -10  -2  -2    0.10   13.90
  10  -2   2   -0.50   11.30
  10   2   2   12.60    9.40
 -10   2  -2   -2.10   12.00
  10   2   2    5.00   11.50
 -11  -2  -2   27.80   16.40
  11  -2   2   54.89   17.20
  11  -2   2   52.09   12.20
  11   2   2   57.79   16.20
  11   2   2   45.20   11.90
 -11   2  -2   53.49   16.70
 -11  -3   2   60.69   18.20
 -11  -3   2   40.30   16.10
  11  -3  -2   17.10   13.30
  11   3  -2   42.40   13.90
 -11   3   2   49.70   17.60
 -11   3   2   32.20   15.40
 -10  -3   2   58.99   15.90
  10  -3  -2   64.69   13.70
 -10  -3   2   58.69   16.20
  10  -3  -2   63.19   13.80
  10   3  -2   57.99   13.20
 -10   3   2   73.89   17.10
 -10   3   2   45.70   15.40
  -9  -3   2  319.07   25.60
   9  -3  -2  306.87   21.70
   9  -3  -2  275.67   21.20
   9   3  -2  332.67   20.40
  -9   3   2  283.57   22.20
  -9   3   2  315.67   24.90
   8  -3  -2   11.00    7.50
   8  -3  -2   12.90    8.60
   8  -3  -2   22.10    9.00
  -8  -3   2   18.60   11.00
   8   3  -2   15.80    7.70
  -8   3   2   32.10   10.90
  -8   3   2    2.80    9.00
   8   3  -2   14.20    7.20
  -7  -3   2  341.37   23.40
   7  -3  -2  389.96   20.90
   7  -3  -2  368.06   21.20
   7  -3  -2  401.46   19.50
  -7   3   2  412.66   22.90
   7   3  -2  424.66   19.20
  -7   3   2  416.16   21.40
   7   3  -2  387.36   18.70
   6  -3  -2   96.89   11.50
   6  -3  -2   71.89   10.30
   6  -3  -2   89.79   10.40
   6  -3  -2  103.19   10.00
   6   3  -2   88.79    9.80
   6   3  -2   96.79   11.40
  -6   3   2  111.99   13.10
   6   3  -2   85.19    9.40
   5  -3  -2   -2.40    4.80
   5  -3  -2    1.10    4.60
   5  -3  -2    9.80    5.80
   5  -3  -2    1.50    3.90
   5   3  -2   -0.50    4.80
   5   3  -2    4.80    4.10
   5   3  -2    0.30    4.20
   4  -3  -2  142.99   11.10
   4  -3  -2  134.69   10.20
   4  -3  -2  140.69    8.90
   4  -3  -2  153.08   10.50
   4   3  -2  153.58   10.90
   4   3  -2  143.49    9.50
   4   3  -2  162.88   10.50
   4   3  -2  149.88    8.70
   3  -3  -2  628.84   19.80
   3  -3  -2  628.64   20.40
   3  -3  -2  617.44   18.40
   3  -3  -2  636.34   21.10
  -3   3   2  616.64   20.10
   3   3  -2  650.83   20.40
   3   3  -2  622.24   17.30
   3   3  -2  618.34   20.40
   2  -3  -2  261.17    8.90
   2  -3  -2  274.67   11.40
   2  -3  -2  272.27   10.90
   2  -3  -2  261.17    7.30
   2  -3  -2  275.07    7.60
   2  -3  -2  257.57   10.20
   2   3  -2  263.27   10.70
   2   3  -2  272.77    7.80
   2   3  -2  278.97   11.00
   2   3  -2  260.67    7.90
   2   3  -2  290.97    8.20
  -2   3   2  258.67    9.90
   1  -3  -2  230.08    8.40
   1  -3  -2  209.58    9.00
   1  -3  -2  206.48    7.30
   1  -3  -2  215.78    7.20
   1  -3  -2  213.08    8.80
  -1  -3   2  226.28    5.80
   1   3  -2  222.98    6.70
   1   3  -2  214.28    8.50
  -1   3   2  226.18    7.50
   1   3  -2  220.18    8.90
  -1   3   2  227.88    8.70
   1   3  -2  217.18    7.80
   1   3  -2  210.38    8.20
   0  -3  -2  287.67    9.90
   0  -3  -2  275.77    8.40
   0  -3  -2  319.87   10.90
   0  -3   2  301.67    9.50
   0  -3  -2  294.07    9.50
   0  -3   2  302.57    8.90
   0  -3  -2  287.77    9.70
   0  -3   2  293.47    8.70
   0   3  -2  296.07   10.00
   0   3   2  300.77    9.60
   0   3   2  277.87    8.50
   0   3   2  286.97    9.90
   0   3  -2  282.47    8.80
   0   3  -2  291.97    8.50
   0   3  -2  308.47   10.00
   1  -3   2 3280.37   73.49
   1  -3   2 3187.28   73.19
   1  -3   2 3328.07   72.99
  -1  -3  -2 3227.48   73.19
  -1  -3  -2 3203.78   74.69
  -1  -3  -2 3230.08   71.79
   1   3   2 3259.07   72.89
  -1   3  -2 3190.58   74.09
  -1   3  -2 3220.38   70.89
  -1   3  -2 3278.67   71.99
   1   3   2 3264.07   73.09
  -1   3  -2 3261.67   72.99
  -1   3  -2 3181.98   73.29
   1   3   2 3274.77   73.49
   2  -3   2   29.70    5.10
  -2  -3  -2   27.50    5.40
  -2  -3  -2   25.00    3.60
   2  -3   2   23.30    3.90
   2  -3   2   16.40    3.30
   2  -3   2   24.20    4.70
  -2   3  -2   28.70    5.10
   2   3   2   23.50    4.30
  -2   3  -2   21.50    3.30
  -2   3  -2   25.20    4.00
   2   3   2   21.10    4.20
   2   3   2   30.10    2.60
   2   3   2   17.10    3.50
   2   3   2   22.20    3.90
   3  -3   2   10.40    5.50
  -3  -3  -2    7.10    5.60
   3  -3   2    2.90    5.20
   3  -3   2    4.40    4.00
   3   3   2   13.70    3.20
   3   3   2    7.10    5.10
   3   3   2    8.80    5.30
  -3   3  -2    8.40    4.30
  -3   3  -2    7.40    5.60
   3   3   2    9.50    4.20
   4  -3   2    8.00    4.40
   4  -3   2   12.10    6.00
   4  -3   2    9.50    5.60
   4  -3   2    7.90    3.60
   4   3   2    6.90    3.80
  -4   3  -2    6.90    4.90
   4   3   2   16.70    5.90
  -4   3  -2    4.20    5.90
   4   3   2   11.50    4.40
   5  -3   2    6.60    3.90
   5  -3   2   10.20    6.40
   5  -3   2   11.00    6.30
   5  -3   2   14.90    4.90
  -5   3  -2   20.20    5.80
   5   3   2   29.50    5.40
  -5   3  -2    4.60    6.70
   5   3   2   20.70    5.10
   5   3   2   48.60    8.20
  -6  -3  -2   -4.30    7.90
  -6  -3  -2  -13.90    7.10
   6  -3   2   -9.10    5.00
   6  -3   2    5.70    7.70
   6  -3   2   -0.70    3.60
   6   3   2    3.20    4.20
   6   3   2    6.90    5.30
  -6   3  -2   -0.70    6.80
   6   3   2   -0.80    4.20
  -6   3  -2   11.90    6.80
   7  -3   2   32.30    8.40
  -7  -3  -2   37.00   11.30
   7  -3   2   38.00    7.70
   7  -3   2   29.80    9.70
  -7  -3  -2   27.40   11.80
   7   3   2   40.50    7.30
  -7   3  -2   37.80    9.80
  -7   3  -2   19.80   10.60
   7   3   2   28.60    6.00
   7   3   2   34.70    9.80
   8  -3   2  168.48   16.20
  -8  -3  -2  163.98   19.50
  -8  -3  -2  198.38   22.70
   8  -3   2  170.78   18.70
   8  -3   2  145.09   13.20
  -8   3  -2  154.68   19.50
   8   3   2  155.48   13.90
  -8   3  -2  157.68   17.20
   8   3   2  171.78   17.30
  -9  -3  -2  131.99   20.10
   9  -3   2  127.29   18.20
   9  -3   2  130.89   14.90
   9  -3   2  113.89   13.00
  -9  -3  -2  105.89   20.10
  -9   3  -2  129.39   20.10
  -9   3  -2   97.89   16.10
   9   3   2  139.39   14.10
   9   3   2  141.29   17.80
  10  -3   2    3.80    8.20
  10  -3   2   -2.20   11.00
 -10  -3  -2    4.90   12.90
 -10  -3  -2   -8.30   12.80
  10   3   2   11.20   11.10
  10   3   2   19.80    9.60
 -10   3  -2   19.00   13.10
 -11  -3  -2   14.50   16.10
  11  -3   2   30.70   11.20
  11  -3   2   27.40   16.40
 -11  -3  -2  -21.60   15.30
  11   3   2   28.40   11.90
  11   3   2   24.20   13.70
 -11   3  -2   42.30   16.30
 -11  -4   2   19.10   15.30
 -11  -4   2    7.20   14.40
  11  -4  -2    0.60   12.40
 -11   4   2  -22.00   11.90
 -11   4   2   18.80   14.40
  11   4  -2    8.50    8.00
  10  -4  -2   17.80   11.60
 -10  -4   2   36.70   14.80
  10  -4  -2   25.00   11.90
  10  -4  -2   28.20    7.30
 -10  -4   2   45.70   16.40
  10   4  -2   17.90    7.40
 -10   4   2   46.80   14.10
  10   4  -2   55.89   11.90
 -10   4   2   32.30   13.90
   9  -4  -2    8.70    8.90
  -9  -4   2   53.69   14.00
   9  -4  -2    0.80    9.00
   9  -4  -2    5.00    5.10
  -9   4   2   30.30   11.40
  -9   4   2   -2.70    9.90
   9   4  -2   22.40    9.50
   9   4  -2   22.90    6.00
  -9   4   2   24.30   11.40
   8  -4  -2    3.30    8.00
   8  -4  -2    0.50    6.40
   8  -4  -2    1.70    7.50
   8  -4  -2   -3.30    3.70
  -8  -4   2   14.60    9.70
  -8   4   2   -1.50    8.40
   8   4  -2    9.00    6.80
   8   4  -2    0.70    3.60
  -8   4   2    1.50    8.20
   8   4  -2    1.30    4.10
   7  -4  -2   40.10    8.70
   7  -4  -2   55.19   11.10
  -7  -4   2   61.49   13.30
   7  -4  -2   53.79   10.80
   7   4  -2   46.70    7.90
  -7   4   2   38.10    9.20
  -7   4   2   37.50   10.10
   7   4  -2   73.69   10.00
   6  -4  -2   18.10    6.00
   6  -4  -2   38.10    7.90
  -6  -4   2   31.70   10.10
   6  -4  -2   22.80    8.00
   6  -4  -2   42.30    9.10
   6   4  -2   41.20    6.80
   6   4  -2   28.50    6.60
   6   4  -2   37.80    8.40
  -6   4   2   39.30    8.50
   5  -4  -2   21.20    5.90
   5  -4  -2   32.10    5.80
   5  -4  -2   31.90    7.10
   5  -4  -2   27.90    7.20
   5   4  -2   29.40    5.40
   5   4  -2   22.80    6.30
  -5   4   2   30.80    7.00
   5   4  -2   27.00    5.40
   4  -4  -2  104.29    9.70
   4  -4  -2  114.09    9.80
   4  -4  -2   98.79    7.60
   4  -4  -2  105.49   10.60
  -4   4   2  114.79    9.40
   4   4  -2  119.89   10.90
  -4   4   2  111.69   10.40
   4   4  -2  102.39    7.20
   3  -4  -2 3011.30   72.49
   3  -4  -2 2943.21   70.69
   3  -4  -2 2993.50   65.39
   3  -4  -2 2938.41   68.29
   3  -4  -2 2981.70   70.89
   3   4  -2 2944.91   67.09
  -3   4   2 3050.39   69.79
   3   4  -2 2949.00   66.09
   3   4  -2 2974.60   71.79
  -3   4   2 3070.29   71.29
   3   4  -2 3050.69   66.39
   2  -4  -2  419.96   11.70
   2  -4  -2  393.06   11.70
   2  -4  -2  401.86   13.70
   2  -4  -2  440.56   15.40
   2  -4  -2  393.36   11.30
   2  -4  -2  425.96   14.60
  -2   4   2  431.16   13.50
   2   4  -2  417.66   12.00
  -2   4   2  445.96   12.10
   2   4  -2  402.76   10.50
   2   4  -2  409.86   11.70
   1  -4  -2  954.10   23.70
   1  -4  -2  965.10   22.60
   1  -4  -2  915.11   25.00
   1  -4  -2  927.71   23.50
  -1  -4   2  935.41   22.90
   1  -4  -2  956.00   25.00
   1  -4  -2  884.41   24.50
  -1   4   2  980.20   23.60
   1   4  -2  991.00   22.70
   1   4  -2  939.21   24.50
   1   4  -2  943.41   23.90
   1   4  -2  940.61   24.40
  -1   4   2  968.80   24.80
  -1   4   2  930.91   23.40
   1   4  -2  941.31   23.40
   0  -4   2  160.18    6.00
   0  -4  -2  146.79    6.70
   0  -4  -2  154.08    7.30
   0  -4  -2  145.09    7.00
   0  -4   2  155.28    6.80
   0  -4  -2  157.88    7.80
   0   4  -2  152.08    7.10
   0   4  -2  149.79    6.00
   0   4   2  154.18    7.40
   0   4   2  157.38    6.20
   0   4   2  154.98    6.70
   0   4  -2  154.18    7.20
   0   4  -2  156.78    6.30
   1  -4   2  225.58    9.50
   1  -4   2  213.58    8.80
  -1  -4  -2  193.48    9.90
   1  -4   2  224.98    9.00
  -1  -4  -2  220.18    9.00
  -1  -4  -2  221.38    8.20
   1   4   2  228.18    8.80
  -1   4  -2  201.88    7.40
  -1   4  -2  216.78    9.30
  -1   4  -2  213.18    8.60
   1   4   2  217.98    8.50
   1   4   2  217.38    9.20
  -1   4  -2  220.78    9.20
  -1   4  -2  232.78    6.90
   2  -4   2  263.87    7.70
  -2  -4  -2  257.97   10.10
   2  -4   2  251.67   11.60
   2  -4   2  262.97   10.40
   2  -4   2  239.58   11.00
  -2  -4  -2  262.37   12.40
   2   4   2  243.48   10.30
  -2   4  -2  246.98    9.40
  -2   4  -2  240.88   11.70
   2   4   2  252.37   10.40
  -2   4  -2  260.47    9.20
   2   4   2  251.77   10.40
   3  -4   2  183.08   12.10
  -3  -4  -2  148.49   12.00
   3  -4   2  164.28   10.90
   3  -4   2  190.18   10.10
   3  -4   2  164.38    6.70
   3   4   2  189.08   10.80
   3   4   2  198.88   11.40
  -3   4  -2  180.48    9.20
   3   4   2  173.48   10.00
  -3   4  -2  173.78   11.80
   4  -4   2    3.10    3.60
   4  -4   2    4.30    2.70
   4  -4   2    7.70    4.40
  -4  -4  -2    3.10    6.00
   4  -4   2    3.30    5.60
   4  -4   2    7.50    5.70
   4   4   2   10.60    3.00
  -4   4  -2    6.40    4.30
  -4   4  -2    1.60    5.10
   4   4   2    8.60    4.10
   4   4   2    2.00    5.10
   5  -4   2  334.37   11.30
   5  -4   2  345.57   14.20
   5  -4   2  323.57   17.70
   5  -4   2  346.17   17.80
  -5  -4  -2  388.76   19.90
   5  -4   2  334.77   14.50
  -5   4  -2  341.07   18.90
  -5   4  -2  366.26   16.20
   5   4   2  345.97   15.00
   5   4   2  342.37   17.10
   5   4   2  359.86   14.60
   5   4   2  373.26   12.30
   6  -4   2   54.59    7.50
  -6  -4  -2   49.70   11.40
   6  -4   2   52.09   10.50
   6  -4   2   48.60    7.70
  -6   4  -2   48.20   10.30
  -6   4  -2   53.99    9.30
   6   4   2   54.79   10.50
   6   4   2   46.90    7.60
   6   4   2   48.80    6.00
   6   4   2   57.89    7.30
  -7  -4  -2  240.38   20.80
  -7  -4  -2  237.08   20.30
   7  -4   2  246.58   18.30
   7  -4   2  245.58   14.50
   7  -4   2  194.28   16.80
   7   4   2  236.78   14.80
  -7   4  -2  236.78   17.10
   7   4   2  215.18   17.80
  -7   4  -2  251.57   20.90
  -8  -4  -2   76.39   16.70
  -8  -4  -2  111.09   17.00
   8  -4   2   99.49   13.40
   8  -4   2   97.49   14.70
   8  -4   2  101.49   11.30
  -8   4  -2   94.19   16.00
  -8   4  -2  114.19   14.80
   8   4   2   93.99   11.60
   8   4   2   91.09   13.40
  -9  -4  -2   12.90   11.50
   9  -4   2    1.50    7.60
   9  -4   2    1.50    8.00
   9  -4   2   21.10   11.80
  -9  -4  -2    7.50   10.90
   9   4   2    2.60    9.50
   9   4   2   17.40    8.60
  -9   4  -2   -1.10   10.40
 -10  -4  -2   15.80   13.30
 -10  -4  -2    6.50   13.10
  10  -4   2   -2.20    8.70
  10  -4   2    7.10   12.00
  10   4   2   -2.60    8.90
  10   4   2    2.80   11.40
 -10   4  -2   14.70   13.00
 -11  -4  -2  110.09   22.60
  11  -4   2  141.09   16.20
 -11  -4  -2   95.99   22.40
  11  -4   2  131.59   21.40
  11   4   2  165.88   18.20
 -11   4  -2  117.79   24.30
 -11   4  -2   90.09   21.10
  11   4   2  163.88   21.60
 -11  -5   2   28.20   17.30
  11  -5  -2   -6.70    7.30
  11  -5  -2   -5.70   11.80
 -11  -5   2    3.60   14.30
 -11   5   2   22.60   14.90
  11   5  -2   20.00    8.10
 -11   5   2   -0.30   12.60
  10  -5  -2  105.99   17.40
  10  -5  -2  119.79   17.90
 -10  -5   2  104.79   19.90
  10  -5  -2   96.39    9.40
  10   5  -2  115.89   11.30
  10   5  -2  113.59   15.20
 -10   5   2  120.89   19.40
 -10   5   2  106.99   18.10
   9  -5  -2  160.08   19.10
   9  -5  -2  122.39   16.80
  -9  -5   2  168.68   21.40
  -9   5   2  171.08   20.10
   9   5  -2  156.78   15.50
  -9   5   2  173.88   20.70
   9   5  -2  134.59   11.30
  -8  -5   2    1.40   10.10
   8  -5  -2  -13.20    6.90
   8  -5  -2   -0.20    7.30
   8  -5  -2    8.40    7.20
  -8   5   2    1.50    8.20
  -8   5   2   22.80   10.10
   8   5  -2  -11.60    4.10
  -8   5   2    7.50    9.00
   8   5  -2    2.60    6.40
   8   5  -2    0.10    4.30
  -7  -5   2   13.60    9.50
   7  -5  -2   38.30    9.70
   7  -5  -2   30.00    9.50
   7  -5  -2   38.90    8.70
   7   5  -2   36.80    5.30
  -7   5   2   50.09   10.50
  -7   5   2   40.10   10.60
  -7   5   2   52.19    9.60
   7   5  -2   43.00    8.40
   7   5  -2   42.30    5.40
   6  -5  -2   51.69    9.80
   6  -5  -2   56.39   10.10
   6  -5  -2   55.89    7.60
  -6  -5   2   41.60   11.40
   6  -5  -2   50.89    8.70
  -6   5   2   64.69   10.20
  -6   5   2   41.60    9.50
   6   5  -2   56.49    5.30
   6   5  -2   62.59    5.70
   6   5  -2   62.99    8.00
   6   5  -2   68.79   10.50
   5  -5  -2  117.29   12.20
   5  -5  -2  134.49   10.50
   5  -5  -2  119.79   11.40
   5  -5  -2  119.89    6.00
   5  -5  -2  117.09    8.40
  -5   5   2  119.99   12.10
   5   5  -2  128.29    6.60
  -5   5   2  138.09   10.90
   5   5  -2  109.79    8.10
   5   5  -2   97.59   10.80
   5   5  -2  121.59    6.60
   4  -5  -2 1284.37   30.70
   4  -5  -2 1296.07   33.50
   4  -5  -2 1319.47   38.70
   4  -5  -2 1309.77   36.60
   4  -5  -2 1304.67   36.90
   4   5  -2 1318.67   31.50
  -4   5   2 1332.77   37.70
   4   5  -2 1289.67   31.30
   4   5  -2 1284.57   32.70
  -4   5   2 1321.27   36.20
   3  -5  -2  619.34   21.10
   3  -5  -2  649.34   16.80
   3  -5  -2  634.94   18.20
   3  -5  -2  645.04   17.20
   3  -5  -2  654.23   21.30
   3  -5  -2  681.13   23.10
  -3   5   2  687.53   19.90
   3   5  -2  651.53   17.80
  -3   5   2  607.94   21.00
   3   5  -2  667.73   22.10
   3   5  -2  649.34   17.50
   3   5  -2  662.53   17.30
   2  -5  -2  942.91   24.30
   2  -5  -2  975.50   23.60
   2  -5  -2  955.90   26.30
   2  -5  -2  937.11   26.60
   2  -5  -2  943.21   23.70
   2  -5  -2  977.80   27.90
   2   5  -2 1008.40   24.90
   2   5  -2  978.20   27.10
   2   5  -2  977.80   25.20
  -2   5   2 1017.30   23.70
  -2   5   2  948.31   25.90
   1  -5  -2   26.00    3.50
  -1  -5   2   31.00    3.50
   1  -5  -2   31.30    4.20
   1  -5  -2   24.00    3.60
   1  -5  -2   22.20    4.10
   1  -5  -2   22.50    4.20
   1  -5  -2   27.00    3.10
   1   5  -2   22.70    3.80
   1   5  -2   26.70    3.60
   1   5  -2   29.50    3.10
   1   5  -2   27.90    4.00
  -1   5   2   29.10    3.60
  -1   5   2   26.50    3.40
  -1   5   2   21.20    4.10
   0  -5  -2  202.38    8.50
   0  -5   2  204.58    8.10
   0  -5  -2  206.28    9.20
   0  -5  -2  200.68    8.60
   0  -5  -2  201.98    8.10
   0   5  -2  206.68    8.70
   0   5   2  205.18    8.80
   0   5   2  202.28    7.70
   0   5   2  207.28    8.30
   0   5  -2  202.68    7.50
   0   5  -2  190.98    7.50
   0   5  -2  210.68    8.70
   1  -5   2    1.50    2.70
  -1  -5  -2    0.30    2.70
   1  -5   2   -1.30    2.90
  -1  -5  -2   -1.20    1.70
  -1  -5  -2    2.30    3.70
  -1   5  -2   -1.00    1.60
   1   5   2    2.30    2.60
   1   5   2    1.90    2.50
  -1   5  -2    2.30    2.30
  -1   5  -2    3.90    2.70
  -1   5  -2   -0.90    2.80
   1   5   2    0.30    2.50
  -2  -5  -2  561.24   17.00
  -2  -5  -2  572.14   20.20
   2  -5   2  566.54   17.30
   2  -5   2  567.74   18.80
   2  -5   2  563.94   14.80
   2  -5   2  530.05   17.90
   2   5   2  570.94   18.50
  -2   5  -2  562.24   18.90
   2   5   2  567.44   17.20
  -2   5  -2  547.55   18.70
  -2   5  -2  545.35   16.50
  -2   5  -2  552.64   15.10
  -2   5  -2  558.74   14.00
   2   5   2  544.55   17.30
   2   5   2  541.55   17.60
   3  -5   2   12.20    5.60
   3  -5   2    5.10    4.50
  -3  -5  -2    0.80    6.20
   3  -5   2    9.60    3.00
   3  -5   2    7.30    6.00
  -3   5  -2    7.40    4.00
   3   5   2    6.80    4.40
  -3   5  -2    3.50    5.40
   3   5   2   -3.30    4.50
   3   5   2    5.90    4.80
   3   5   2    6.50    4.20
   4  -5   2  516.65   17.70
  -4  -5  -2  536.25   22.70
   4  -5   2  505.95   20.40
   4  -5   2  490.75   20.70
   4  -5   2  504.15   14.60
   4   5   2  511.95   19.70
   4   5   2  509.85   18.10
  -4   5  -2  513.15   17.40
   4   5   2  529.05   19.60
  -4   5  -2  516.85   21.80
   5  -5   2   61.19    9.60
   5  -5   2   61.69   10.10
   5  -5   2   55.09    7.20
   5  -5   2   48.00    6.70
   5  -5   2   53.59    4.90
  -5  -5  -2   51.39   10.20
   5   5   2   60.69    9.20
   5   5   2   52.49    7.20
  -5   5  -2   48.90    9.30
   5   5   2   48.50    4.60
   5   5   2   63.99    7.70
  -5   5  -2   60.69    7.80
   6  -5   2  112.89   10.50
   6  -5   2   92.79    7.10
   6  -5   2  114.99   13.40
   6  -5   2   99.49    9.30
   6  -5   2  103.59   13.00
  -6  -5  -2  104.09   14.60
  -6   5  -2   99.79   10.70
   6   5   2  118.49   13.30
  -6   5  -2  105.99   14.00
   6   5   2  115.39   10.60
   6   5   2   94.49    7.30
   6   5   2   84.19    9.20
  -7  -5  -2   17.20   11.20
   7  -5   2   -3.50    7.90
   7  -5   2    1.00    7.40
  -7  -5  -2   12.00   10.40
   7  -5   2    1.20    6.00
  -7   5  -2    0.70    6.80
   7   5   2    0.90    6.20
   7   5   2   -3.40    7.00
  -7   5  -2   -0.30    7.80
  -8  -5  -2  242.48   25.90
   8  -5   2  248.38   21.00
   8  -5   2  269.57   20.20
  -8  -5  -2  256.77   22.60
   8  -5   2  268.17   16.50
  -8   5  -2  284.07   19.00
   8   5   2  293.17   20.50
   8   5   2  249.38   16.90
  -8   5  -2  280.07   23.10
  -9  -5  -2   23.20   12.30
   9  -5   2   27.30    8.80
   9  -5   2   20.80   10.70
   9  -5   2   10.50   10.70
  -9  -5  -2   30.10   13.30
   9   5   2   18.60    9.30
  -9   5  -2   17.70   11.90
   9   5   2   27.80   11.20
  10  -5   2   49.60   15.40
 -10  -5  -2   37.60   17.40
 -10  -5  -2   48.00   16.70
  10  -5   2   22.70   10.00
 -10   5  -2   30.30   16.50
 -10   5  -2    1.60   13.80
  10   5   2   45.10   12.00
  10   5   2   30.50   12.60
 -11  -5  -2   54.29   19.20
  11  -5   2   14.50   10.20
 -11  -5  -2    9.80   17.80
  11  -5   2   40.30   15.10
  11   5   2   23.60   14.30
 -11   5  -2   17.80   17.60
  11   5   2   22.00   11.40
 -11   5  -2   23.80   15.40
  11  -6  -2    1.40    6.60
  11  -6  -2   -9.80   12.20
  11  -6  -2    4.90   12.50
 -11  -6   2   14.40   15.10
 -11  -6   2   19.10   16.10
 -11   6   2  -36.50   12.80
 -11   6   2   21.00   13.60
  11   6  -2    6.80    7.60
  10  -6  -2  189.28   21.90
 -10  -6   2  163.08   24.10
  10  -6  -2  205.88   21.90
 -10   6   2  222.18   24.50
  10   6  -2  156.18   13.60
 -10   6   2  185.58   22.80
  -9  -6   2   21.70   12.00
   9  -6  -2    1.60    9.10
   9  -6  -2    8.40   10.10
   9  -6  -2   17.20    6.10
   9   6  -2   12.30    6.60
  -9   6   2   33.00   11.90
   9   6  -2   14.90    8.40
  -9   6   2    8.80   10.80
   8  -6  -2  296.97   13.20
   8  -6  -2  320.87   13.30
   8  -6  -2  329.27   21.70
   8  -6  -2  301.07   19.00
  -8  -6   2  275.47   23.20
   8  -6  -2  338.17   21.40
  -8   6   2  353.16   23.40
  -8   6   2  333.37   23.00
   8   6  -2  317.37   17.60
   8   6  -2  308.67   14.10
  -8   6   2  348.77   20.10
   7  -6  -2    6.00    8.20
   7  -6  -2   16.80    7.20
  -7  -6   2    3.40    9.30
   7  -6  -2   -1.30    3.30
   7  -6  -2    6.30    7.70
   7  -6  -2   -2.00    3.80
  -7   6   2   -0.10    6.80
  -7   6   2    8.70    7.00
   7   6  -2   -3.80    5.60
   7   6  -2   12.70    3.80
  -7   6   2    8.70    7.70
   7   6  -2    7.20    4.10
   6  -6  -2   21.90    5.30
   6  -6  -2    5.00    7.20
   6  -6  -2   12.80    4.10
  -6  -6   2   -3.70    7.70
   6  -6  -2   11.50    7.30
   6  -6  -2   11.80    3.40
   6  -6  -2    5.80    5.80
  -6   6   2   -0.40    6.40
   6   6  -2   14.30    5.30
   6   6  -2   14.00    7.00
  -6   6   2   10.70    7.10
   6   6  -2    4.00    4.00
   6   6  -2   12.70    3.80
   5  -6  -2    6.80    5.90
   5  -6  -2    4.20    2.70
   5  -6  -2   11.90    4.20
   5  -6  -2    4.80    3.40
   5  -6  -2    9.00    5.30
   5  -6  -2   10.20    6.40
   5   6  -2   11.60    6.10
  -5   6   2   12.10    5.70
   5   6  -2    8.00    3.30
   5   6  -2    9.30    4.00
   5   6  -2    5.60    3.00
  -5   6   2   13.10    5.90
   4  -6  -2   14.10    3.10
   4  -6  -2    3.40    3.40
   4  -6  -2    9.50    5.60
   4  -6  -2    7.60    5.80
   4  -6  -2    2.50    4.80
   4  -6  -2    6.80    3.00
   4   6  -2    6.40    5.20
   4   6  -2    6.40    3.10
   4   6  -2    5.60    3.10
  -4   6   2    7.40    4.50
  -4   6   2    4.40    4.80
   4   6  -2    6.40    3.00
   3  -6  -2   60.59    8.80
   3  -6  -2   69.39    5.50
   3  -6  -2   68.89    5.90
   3  -6  -2   59.99    5.10
   3  -6  -2   76.89    8.60
   3  -6  -2   68.69    8.10
   3   6  -2   79.59    6.30
  -3   6   2   60.69    7.30
   3   6  -2   64.99    5.60
   3   6  -2   77.99    8.60
   3   6  -2   65.09    4.70
  -3   6   2   65.19    6.40
   2  -6  -2  303.97    9.10
   2  -6  -2  267.37   12.90
   2  -6  -2  287.37   11.80
   2  -6  -2  291.37   10.20
   2  -6  -2  272.57    9.70
   2  -6  -2  286.27   12.40
  -2   6   2  268.27   11.20
   2   6  -2  283.87   12.50
  -2   6   2  302.77    9.20
   2   6  -2  296.07   11.00
   2   6  -2  282.87   10.70
  -2   6   2  296.47   12.60
   1  -6  -2 1361.36   35.00
   1  -6  -2 1355.56   32.90
   1  -6  -2 1338.87   34.40
   1  -6  -2 1309.47   33.40
  -1   6   2 1347.17   34.40
  -1   6   2 1396.06   33.50
  -1   6   2 1374.46   33.50
   1   6  -2 1369.76   34.30
   1   6  -2 1313.67   33.90
   1   6  -2 1345.97   33.90
   1   6  -2 1387.26   32.40
  -1   6   2 1309.57   30.00
   0  -6   2   27.80    3.80
   0  -6  -2   27.50    4.00
   0  -6  -2   37.00    5.20
   0  -6  -2   25.90    4.30
   0  -6   2   30.40    3.10
   0  -6  -2   28.40    4.10
   0   6   2   26.00    3.60
   0   6  -2   22.00    3.30
   0   6  -2   24.90    3.80
   0   6   2   27.30    4.10
   0   6   2   27.30    4.10
   0   6  -2   28.20    3.70
   0   6  -2   28.50    4.30
   1  -6   2  667.13   20.70
  -1  -6  -2  727.13   20.60
  -1  -6  -2  684.43   17.70
   1  -6   2  699.83   19.50
  -1  -6  -2  661.53   21.80
   1  -6   2  694.43   19.90
  -1   6  -2  702.83   17.20
   1   6   2  686.03   20.60
  -1   6  -2  715.63   20.20
   1   6   2  703.83   19.90
  -1   6  -2  709.43   20.50
  -1   6  -2  709.73   20.20
   1   6   2  716.43   19.60
   2  -6   2  560.34   17.90
   2  -6   2  550.74   18.50
  -2  -6  -2  574.94   21.10
   2  -6   2  576.84   19.90
  -2  -6  -2  595.34   18.10
   2   6   2  573.44   18.60
   2   6   2  577.34   17.50
   2   6   2  601.44   17.90
  -2   6  -2  521.95   14.70
  -2   6  -2  555.94   19.30
  -2   6  -2  524.35   19.00
  -2   6  -2  573.94   17.30
  -2   6  -2  569.84   14.00
   2   6   2  552.44   18.60
   3  -6   2  167.08    7.70
  -3  -6  -2  187.78   13.30
   3  -6   2  178.68   12.60
   3  -6   2  175.58   10.20
   3  -6   2  175.08   11.60
   3  -6   2  159.88    9.70
   3   6   2  164.98   10.50
  -3   6  -2  175.48   11.80
  -3   6  -2  158.98   11.60
  -3   6  -2  171.28    8.00
   3   6   2  155.88   10.10
   3   6   2  155.08   10.10
   3   6   2  153.88   10.10
  -4  -6  -2    7.10    6.60
   4  -6   2    1.10    5.70
   4  -6   2    1.60    4.30
   4  -6   2   -2.70    4.80
  -4   6  -2    7.40    6.30
   4   6   2    3.90    4.90
   4   6   2    7.50    5.60
  -4   6  -2    2.00    3.60
   4   6   2    7.10    4.40
  -4   6  -2    0.00    5.30
   5  -6   2    2.30    4.00
   5  -6   2   -7.50    6.40
   5  -6   2    0.80    6.20
   5  -6   2    0.10    2.90
  -5  -6  -2   10.80    7.40
   5  -6   2    2.00    4.90
  -5   6  -2   -7.80    4.20
   5   6   2    2.80    4.40
  -5   6  -2   -1.00    6.20
   5   6   2    1.00    5.50
   5   6   2    9.70    4.60
   6  -6   2   10.50    6.20
   6  -6   2   14.50    4.50
   6  -6   2   15.70    9.00
   6  -6   2   24.20    9.40
  -6  -6  -2    8.00    8.60
   6  -6   2   12.70    5.40
  -6   6  -2   16.40    9.20
  -6   6  -2   20.00    6.90
   6   6   2    9.10    7.90
   6   6   2   21.50    6.90
   7  -6   2   13.70    9.00
   7  -6   2   15.00    9.20
  -7  -6  -2   12.90   11.10
   7  -6   2    4.30    6.40
  -7   6  -2   -4.30    8.40
  -7   6  -2   15.10    7.80
   7   6   2    0.00    6.40
   8  -6   2  374.86   23.10
  -8  -6  -2  456.35   29.30
   8  -6   2  395.86   19.60
  -8  -6  -2  422.76   29.80
   8  -6   2  374.76   24.50
   8   6   2  427.66   21.30
  -8   6  -2  344.47   26.20
   8   6   2  400.06   23.20
   9  -6   2   21.20    8.40
  -9  -6  -2   16.10   13.20
   9  -6   2   11.60   10.20
   9  -6   2   24.20   12.40
  -9  -6  -2    4.50   11.90
   9   6   2   11.70    8.90
  -9   6  -2   13.20   12.20
  -9   6  -2   -4.80   11.20
   9   6   2    2.90   10.00
 -10  -6  -2   28.20   15.40
  10  -6   2   39.20   10.50
 -10  -6  -2   48.40   16.70
  10  -6   2   60.39   16.70
  10  -6   2   59.39   13.50
  10   6   2   48.90   12.30
 -10   6  -2   56.09   17.30
 -10   6  -2   46.70   16.40
  10   6   2   31.80   13.10
  11  -7  -2   15.20   14.60
  11  -7  -2   14.70   13.90
 -11  -7   2   30.50   17.40
 -11  -7   2   23.80   16.70
  11  -7  -2   20.60    8.30
  11   7  -2   23.30   10.10
 -11   7   2   -0.50   14.30
 -11   7   2   36.20   17.10
  10  -7  -2   38.60    7.30
  10  -7  -2   50.59   14.30
 -10  -7   2   53.19   17.10
  10  -7  -2   72.39   16.40
  10   7  -2   54.39    9.80
 -10   7   2   56.49   14.20
 -10   7   2   67.19   16.90
   9  -7  -2    6.40   10.10
  -9  -7   2   12.00   12.60
   9  -7  -2   -0.20    8.60
   9  -7  -2    7.80    5.80
   9   7  -2   -4.40    5.50
   9   7  -2   -6.50    7.00
  -9   7   2   -2.90    9.90
  -9   7   2    2.30    8.30
  -8  -7   2   -6.30    9.80
   8  -7  -2  -17.10    7.30
   8  -7  -2   12.30    8.90
   8  -7  -2   -4.60    6.20
   8  -7  -2    4.70    5.10
   8   7  -2   12.30    6.70
  -8   7   2    2.60    8.90
   8   7  -2   -1.10    4.90
  -8   7   2   -0.50    8.00
   7  -7  -2  116.09   14.50
   7  -7  -2  131.09   13.50
  -7  -7   2  129.69   17.70
   7  -7  -2  146.59   15.20
   7  -7  -2  131.39    8.60
  -7   7   2  140.79   13.10
  -7   7   2  148.99   16.30
  -7   7   2  138.99   15.20
   7   7  -2  105.59    9.20
   7   7  -2  105.99    9.30
   7   7  -2  109.09   11.10
  -6  -7   2   21.20    9.70
   6  -7  -2   16.70    4.80
   6  -7  -2   16.70    4.10
   6  -7  -2   15.50    4.80
   6  -7  -2   16.50    7.90
   6  -7  -2   19.90    7.20
   6  -7  -2   30.70    9.10
   6   7  -2   12.90    5.50
  -6   7   2   24.10    8.40
   6   7  -2   12.30    7.20
  -6   7   2    7.70    6.40
   6   7  -2   18.50    4.60
  -6   7   2   16.80    6.80
   6   7  -2   13.60    4.70
   5  -7  -2  281.07   14.90
   5  -7  -2  246.58   16.70
   5  -7  -2  261.87   11.20
   5  -7  -2  242.98   10.20
   5  -7  -2  313.67   16.60
   5   7  -2  258.37   10.80
  -5   7   2  254.67   14.10
   5   7  -2  233.38   15.40
   5   7  -2  271.27   11.30
   5   7  -2  261.47   11.30
  -5   7   2  290.37   16.20
   4  -7  -2   79.09    6.20
   4  -7  -2   81.49   10.10
   4  -7  -2   89.99    6.30
   4  -7  -2   76.69    6.20
   4  -7  -2   87.39    9.60
   4  -7  -2   96.89    9.60
   4   7  -2   87.29    5.90
  -4   7   2  104.59   10.00
   4   7  -2   81.09    6.50
   4   7  -2  110.99   11.20
   4   7  -2   88.69    6.80
  -4   7   2   85.49    7.80
   3  -7  -2   -2.80    5.50
   3  -7  -2    6.70    3.50
   3  -7  -2   -0.30    3.10
   3  -7  -2   -4.30    4.60
   3  -7  -2   -1.00    2.60
   3  -7  -2    5.50    4.70
  -3   7   2    2.70    3.40
   3   7  -2    3.60    2.30
   3   7  -2    3.10    3.10
  -3   7   2    3.60    4.10
   3   7  -2    2.80    4.70
   3   7  -2    1.10    3.20
   3   7  -2    4.50    4.40
   2  -7  -2  739.73   20.60
   2  -7  -2  736.83   18.70
   2  -7  -2  743.63   23.10
   2  -7  -2  753.72   24.30
   2  -7  -2  709.63   22.20
   2  -7  -2  739.63   19.80
  -2   7   2  751.82   22.20
  -2   7   2  760.92   18.90
   2   7  -2  735.43   20.70
   2   7  -2  748.63   21.40
   2   7  -2  745.03   21.60
  -2   7   2  726.63   23.10
   2   7  -2  735.73   23.10
   1  -7  -2  883.11   23.90
   1  -7  -2  914.71   25.60
   1  -7  -2  894.01   24.60
  -1  -7   2  922.31   24.10
   1  -7  -2  927.91   26.00
  -1   7   2  893.91   24.30
   1   7  -2  922.91   23.50
   1   7  -2  924.11   25.20
   1   7  -2  878.21   25.00
   1   7  -2  873.71   24.70
  -1   7   2  914.71   24.60
  -1   7   2  935.31   25.50
  -1   7   2  878.11   21.10
   0  -7  -2  460.05   16.00
   0  -7  -2  464.65   15.40
   0  -7   2  430.56   15.00
   0  -7  -2  472.25   14.80
   0  -7   2  457.25   12.70
   0  -7  -2  424.26   14.90
   0  -7   2  479.85   14.90
   0   7   2  468.25   15.60
   0   7  -2  453.45   13.80
   0   7  -2  469.65   14.30
   0   7  -2  464.75   15.30
   0   7   2  427.06   14.10
   0   7  -2  458.95   15.00
   0   7   2  453.65   14.50
  -1  -7  -2  550.04   19.70
  -1  -7  -2  548.75   17.80
   1  -7   2  510.85   16.40
  -1  -7  -2  553.94   15.20
   1  -7   2  543.95   17.10
   1  -7   2  557.04   18.70
  -1   7  -2  542.25   14.60
  -1   7  -2  566.04   17.50
   1   7   2  574.64   16.70
  -1   7  -2  564.24   17.80
  -1   7  -2  586.34   17.80
   1   7   2  558.64   17.20
   1   7   2  567.04   18.40
  -2  -7  -2    1.90    3.90
  -2  -7  -2   -7.20    5.50
   2  -7   2    0.10    4.40
   2  -7   2   -1.10    4.10
   2  -7   2   12.60    6.10
  -2   7  -2    0.40    3.30
   2   7   2    3.80    4.00
  -2   7  -2    2.20    4.50
   2   7   2    1.00    4.10
   2   7   2    8.70    4.80
   2   7   2   -3.00    4.00
  -2   7  -2   -2.10    2.00
  -2   7  -2    3.10    4.80
   3  -7   2  139.69   11.90
   3  -7   2  130.59    9.60
   3  -7   2  135.89   10.60
  -3  -7  -2  151.78   12.80
   3  -7   2  145.69    9.80
   3  -7   2  135.49    7.60
   3   7   2  133.99    9.30
  -3   7  -2  132.09    6.60
  -3   7  -2  142.09    5.50
   3   7   2  136.49    9.70
  -3   7  -2  126.39   10.30
  -3   7  -2  150.58   11.80
   3   7   2  128.39    9.70
   4  -7   2 1495.15   38.80
   4  -7   2 1463.15   35.90
   4  -7   2 1521.55   43.60
  -4  -7  -2 1462.35   45.50
   4  -7   2 1439.26   41.60
  -4   7  -2 1480.15   43.20
   4   7   2 1502.45   40.20
  -4   7  -2 1347.87   42.70
   4   7   2 1421.06   39.80
  -4   7  -2 1432.96   35.70
   4   7   2 1422.76   39.50
   5  -7   2  151.78   15.30
   5  -7   2  110.89   12.10
   5  -7   2  106.09    7.60
   5  -7   2  119.69    9.50
   5  -7   2  108.19   10.00
  -5  -7  -2  148.89   16.40
   5   7   2  135.09   12.70
  -5   7  -2  120.89    8.90
  -5   7  -2  139.29   14.30
   5   7   2  121.29   10.60
  -5   7  -2  128.59   13.80
   6  -7   2  254.27   19.00
  -6  -7  -2  273.77   20.60
   6  -7   2  282.77   15.30
   6  -7   2  251.47   18.50
   6  -7   2  253.07   11.20
  -6   7  -2  258.17   14.00
  -6   7  -2  252.87   19.00
   6   7   2  285.97   17.30
   6   7   2  278.77   15.60
  -6   7  -2  223.08   17.90
   7  -7   2   83.99   10.40
   7  -7   2   85.99   13.10
  -7  -7  -2   58.39   14.70
   7  -7   2   88.49   14.20
  -7   7  -2   91.79   15.10
  -7   7  -2  102.19   13.40
  -7   7  -2  119.79   15.80
   7   7   2  104.29   11.90
   8  -7   2    6.80    9.60
   8  -7   2   18.60    8.40
  -8  -7  -2   27.20   13.00
   8  -7   2    7.50    8.80
  -8  -7  -2   22.70   12.80
   8   7   2    4.20    8.20
  -8   7  -2   16.30   11.00
  -8   7  -2    5.70   10.60
   8   7   2   24.70    9.60
  -9  -7  -2  142.19   23.20
   9  -7   2  181.28   15.70
  -9  -7  -2  130.69   20.20
   9  -7   2  168.18   20.20
   9  -7   2  157.88   19.00
  -9   7  -2  190.88   22.80
   9   7   2  180.68   19.10
  -9   7  -2  154.68   21.70
   9   7   2  166.28   16.50
 -10  -7  -2   10.90   14.70
  10  -7   2    4.40    9.40
  10  -7   2   10.10   10.90
 -10  -7  -2   17.80   15.30
  10  -7   2   15.90   13.70
  10   7   2    1.20   10.30
 -10   7  -2  -18.50   14.30
  10   7   2   10.80   12.00
 -10   7  -2   -0.60   13.90
 -11  -8   2   36.90   19.30
  11  -8  -2    9.00   14.00
  11  -8  -2   14.40   14.30
  11  -8  -2   21.10    6.80
 -11  -8   2   31.90   17.50
  11   8  -2    5.90    9.80
 -11   8   2   21.10   14.90
  10  -8  -2    9.70   12.60
  10  -8  -2   43.10   13.60
  10  -8  -2    0.90    5.70
 -10  -8   2   20.70   13.90
  10   8  -2   23.10    8.60
 -10   8   2    5.10   12.00
 -10   8   2   -3.50   11.70
   9  -8  -2    8.10   10.80
   9  -8  -2   -8.30    8.70
  -9  -8   2   30.00   13.90
   9  -8  -2   22.30    6.50
  -9   8   2   13.90   11.40
   9   8  -2   13.90    7.20
  -9   8   2   14.60   10.50
   8  -8  -2  231.38   16.90
   8  -8  -2  242.68   22.60
   8  -8  -2  235.98   21.40
  -8  -8   2  236.68   25.10
   8   8  -2  240.48   15.30
  -8   8   2  244.88   21.00
  -8   8   2  254.77   19.50
   8   8  -2  220.88   13.70
   7  -8  -2   83.59    7.80
   7  -8  -2   93.39   13.00
   7  -8  -2  103.49   14.30
  -7  -8   2   95.29   16.30
   7  -8  -2   85.49   11.40
   7  -8  -2   76.59    7.30
  -7   8   2   77.39   12.00
  -7   8   2   96.99   14.00
   7   8  -2   96.69   10.60
  -7   8   2  110.69   11.60
   7   8  -2   89.29    8.80
  -6  -8   2    4.10    9.50
   6  -8  -2   23.80    5.20
   6  -8  -2   14.40    8.30
   6  -8  -2   18.40    7.40
   6  -8  -2   22.40    5.00
   6  -8  -2    2.30    7.50
  -6   8   2   15.70    6.60
  -6   8   2   15.80    7.70
   6   8  -2   20.40    5.40
   6   8  -2   24.40    8.50
  -6   8   2   29.20    7.30
   6   8  -2   28.50    5.70
   6   8  -2   19.20    4.80
   5  -8  -2  155.58   14.10
   5  -8  -2  131.49   11.90
   5  -8  -2  110.39    7.80
   5  -8  -2  145.99    8.00
   5  -8  -2  126.89   13.60
   5  -8  -2  123.69    8.10
   5   8  -2  120.69    8.10
  -5   8   2  122.89   10.50
   5   8  -2  119.49    8.10
   5   8  -2  136.79    8.90
   5   8  -2  126.99   12.90
  -5   8   2  135.09   12.00
   4  -8  -2    9.60    5.90
   4  -8  -2    5.80    5.80
   4  -8  -2   12.20    5.60
   4  -8  -2   10.60    3.60
   4  -8  -2    9.40    3.20
   4  -8  -2   14.50    3.80
   4   8  -2   15.60    6.20
   4   8  -2    8.60    3.90
  -4   8   2   10.40    5.00
  -4   8   2    9.60    4.40
   4   8  -2   12.10    3.70
   4   8  -2   10.80    3.00
   3  -8  -2 1001.10   27.70
   3  -8  -2 1046.10   25.60
   3  -8  -2 1028.70   30.50
   3  -8  -2 1072.29   32.70
   3  -8  -2 1026.60   27.40
   3  -8  -2 1034.70   30.60
  -3   8   2 1043.10   30.40
   3   8  -2 1015.60   31.20
   3   8  -2 1010.00   28.40
  -3   8   2 1029.90   27.20
   3   8  -2 1035.30   29.80
   2  -8  -2 1520.25   35.30
   2  -8  -2 1546.25   40.50
   2  -8  -2 1527.85   36.50
   2  -8  -2 1576.94   42.10
   2  -8  -2 1489.85   39.60
   2  -8  -2 1459.75   38.50
   2   8  -2 1523.25   40.50
  -2   8   2 1548.15   39.60
  -2   8   2 1536.35   35.60
   2   8  -2 1549.84   38.60
   2   8  -2 1540.15   39.30
  -2   8   2 1535.55   40.60
   1  -8  -2  198.78    9.50
   1  -8  -2  214.98   10.20
   1  -8  -2  182.28   10.80
  -1  -8   2  202.78    9.50
   1  -8  -2  198.48   11.10
   1   8  -2  188.48    9.80
   1   8  -2  197.88    8.80
   1   8  -2  208.28   10.30
  -1   8   2  177.28    9.30
  -1   8   2  204.38    9.90
   1   8  -2  179.68    9.80
  -1   8   2  187.38    6.80
  -1   8   2  196.18   10.30
   0  -8  -2   35.70    6.10
   0  -8   2   33.50    5.00
   0  -8   2   28.90    5.50
   0  -8  -2   30.30    5.10
   0  -8  -2   36.10    5.30
   0  -8  -2   27.90    5.10
   0  -8   2   32.80    3.90
   0   8  -2   37.80    5.20
   0   8  -2   24.70    4.40
   0   8  -2   31.30    4.20
   0   8   2   38.80    5.10
   0   8  -2   42.00    5.60
   0   8   2   34.40    4.70
   0   8   2   34.20    5.30
  -1  -8  -2  166.18   11.30
   1  -8   2  181.98    9.90
   1  -8   2  166.98    8.90
  -1  -8  -2  195.48   10.40
   1  -8   2  169.58   11.00
  -1  -8  -2  164.48    8.00
  -1   8  -2  174.88    9.60
   1   8   2  163.38   10.30
  -1   8  -2  164.38    9.80
   1   8   2  167.98    8.50
  -1   8  -2  170.18    9.60
  -1   8  -2  173.48    7.00
   1   8   2  160.48    9.00
  -2  -8  -2    9.60    6.40
   2  -8   2    7.70    4.80
   2  -8   2    9.50    6.30
   2  -8   2   11.10    5.20
  -2  -8  -2    5.90    4.50
  -2   8  -2   14.20    5.50
   2   8   2    5.20    4.30
   2   8   2    5.30    4.60
   2   8   2    7.70    4.80
  -2   8  -2    8.50    5.00
  -2   8  -2    8.20    3.90
  -3  -8  -2  217.98   14.90
   3  -8   2  202.28   11.30
   3  -8   2  209.08    9.70
   3  -8   2  186.78   11.80
   3  -8   2  223.08   14.00
  -3   8  -2  217.08   12.90
   3   8   2  203.78   10.50
   3   8   2  206.18   11.90
  -3   8  -2  203.18   12.70
   3   8   2  197.18   10.80
   4  -8   2  166.18    8.70
  -4  -8  -2  184.88   15.30
   4  -8   2  185.58   11.10
   4  -8   2  184.88   13.20
   4  -8   2  169.28   14.30
  -4   8  -2  163.18   12.60
   4   8   2  181.38   11.70
  -4   8  -2  171.28   13.70
   4   8   2  181.28   11.20
   4   8   2  171.68   11.20
   4   8   2  186.38   11.80
  -4   8  -2  164.58    7.60
   5  -8   2  134.59    8.50
   5  -8   2  138.89   14.60
   5  -8   2  142.09   14.30
   5  -8   2  141.19   10.90
  -5  -8  -2  146.49   16.70
  -5   8  -2  132.29    8.70
   5   8   2  143.89   13.10
  -5   8  -2  139.89   14.10
   5   8   2  148.89   11.80
  -5   8  -2  122.29   14.00
   6  -8   2   17.30    9.00
   6  -8   2   11.60    6.20
   6  -8   2   12.10    4.70
  -6  -8  -2   10.80    9.60
   6  -8   2   16.10    9.70
  -6   8  -2   14.30    8.10
   6   8   2    2.80    6.00
  -6   8  -2   17.20    5.80
  -6   8  -2   10.90    8.20
   6   8   2   10.70    7.70
  -7  -8  -2   38.10   13.30
   7  -8   2   36.80   11.20
   7  -8   2   28.80    7.90
  -7   8  -2   33.50   10.90
   7   8   2   28.90    8.50
  -7   8  -2   18.40   10.90
  -8  -8  -2   18.70   12.00
   8  -8   2    3.00    9.90
   8  -8   2   -5.60    8.20
   8  -8   2   -9.30    7.00
   8   8   2   -6.90    8.50
  -8   8  -2    1.90   10.30
   8   8   2    8.70    8.60
  -8   8  -2   -0.60    9.90
  -9  -8  -2   -0.30   11.60
  -9  -8  -2    7.50   13.20
   9  -8   2    3.00   10.20
   9  -8   2    9.00   11.80
   9  -8   2   -4.40    7.90
   9   8   2   -1.70    9.30
  -9   8  -2    7.90   11.60
  -9   8  -2   -2.90   12.30
   9   8   2    5.60    9.10
  10  -8   2   18.30   13.60
 -10  -8  -2   27.50   15.90
  10  -8   2   27.10   12.30
 -10  -8  -2   -9.90   13.30
  10  -8   2    3.60    9.50
  10   8   2   40.40   12.80
 -10   8  -2    9.10   15.00
 -10   8  -2   28.40   15.80
  10   8   2   25.40   12.60
  10  -9  -2   25.00   13.20
 -10  -9   2    0.80   13.90
  10  -9  -2   18.80    6.80
  10  -9  -2   16.80   12.70
 -10   9   2   11.20   12.80
 -10   9   2    3.60   11.50
  10   9  -2   -0.20    8.20
  -9  -9   2  115.49   20.40
   9  -9  -2  111.79   16.60
   9  -9  -2  120.19   17.50
  -9   9   2  103.29   15.90
   9   9  -2  124.09   12.70
  -9   9   2  122.49   17.70
   8  -9  -2   19.50    6.00
   8  -9  -2   19.60    9.90
   8  -9  -2   27.80    8.70
   8  -9  -2   24.20   10.60
  -8  -9   2   41.40   14.70
  -8   9   2   28.70   10.50
   8   9  -2   24.60    7.00
  -8   9   2   25.90   10.60
   7  -9  -2  230.78   19.50
   7  -9  -2  324.07   20.70
  -7  -9   2  291.87   22.80
   7  -9  -2  284.37   17.60
   7   9  -2  254.57   14.10
   7   9  -2  261.37   14.00
  -7   9   2  264.37   19.20
  -7   9   2  302.57   18.90
   6  -9  -2   73.49    7.40
   6  -9  -2   81.09   11.90
   6  -9  -2   72.19   10.20
  -6  -9   2  103.99   16.40
   6  -9  -2   80.29    7.60
   6  -9  -2   76.89   13.10
   6   9  -2   89.79    8.30
  -6   9   2   97.09   11.40
   6   9  -2   80.19    8.60
  -6   9   2   76.39    8.40
   6   9  -2   66.69   11.60
   6   9  -2   86.29    8.10
  -6   9   2   93.69   12.30
  -5  -9   2   21.30   10.00
   5  -9  -2   32.80    4.50
   5  -9  -2   20.50    4.40
   5  -9  -2   28.10    5.20
   5  -9  -2    7.60    7.60
   5  -9  -2   22.20    8.20
   5   9  -2   25.80    5.50
   5   9  -2   30.50    8.10
   5   9  -2   34.90    5.00
  -5   9   2   18.30    6.60
  -5   9   2   19.60    6.20
   5   9  -2   22.40    4.60
   4  -9  -2   10.60    5.60
   4  -9  -2    3.90    5.60
   4  -9  -2    9.00    3.80
   4  -9  -2    9.60    3.90
   4  -9  -2    3.00    2.70
   4  -9  -2    2.80    5.90
   4   9  -2   13.30    5.50
  -4   9   2    6.50    4.70
   4   9  -2    7.40    4.00
  -4   9   2   12.30    4.20
   4   9  -2   12.20    2.90
   4   9  -2   14.70    4.00
   3  -9  -2   16.30    4.50
   3  -9  -2   12.90    5.60
   3  -9  -2   16.50    6.40
   3  -9  -2    2.50    5.00
   3   9  -2    9.10    5.10
  -3   9   2   12.80    4.90
  -3   9   2   13.70    4.00
   3   9  -2    9.00    5.00
   3   9  -2   12.30    4.10
   2  -9  -2    4.20    5.20
   2  -9  -2    8.60    2.90
   2  -9  -2    4.80    3.90
   2  -9  -2   10.20    5.90
   2   9  -2    0.30    4.30
   2   9  -2   13.50    4.60
  -2   9   2   11.90    4.60
  -2   9   2    7.70    3.10
  -2   9   2    5.20    4.90
   2   9  -2    7.30    4.20
   1  -9  -2  705.23   20.60
   1  -9  -2  717.93   22.90
   1  -9  -2  691.83   21.90
  -1  -9   2  700.43   21.20
   1  -9  -2  704.43   23.00
   1   9  -2  678.93   21.30
  -1   9   2  674.63   18.00
   1   9  -2  703.93   20.50
  -1   9   2  708.13   22.00
   1   9  -2  705.63   22.20
   1   9  -2  688.63   22.10
  -1   9   2  698.13   21.30
  -1   9   2  704.13   21.80
   0  -9  -2    7.30    5.30
   0  -9  -2    0.80    4.40
   0  -9   2   -5.10    4.20
   0  -9  -2    4.60    4.60
   0  -9   2   -0.70    3.20
   0  -9  -2    7.80    4.60
   0  -9   2   -4.30    4.10
   0   9  -2   -2.60    3.10
   0   9   2   -0.70    4.10
   0   9  -2    0.00    4.10
   0   9   2   -2.10    3.60
   0   9  -2    1.50    3.90
   0   9   2   -0.20    3.80
   0   9  -2   -2.40    3.70
  -1  -9  -2  385.66   15.80
  -1  -9  -2  396.26   13.40
  -1  -9  -2  388.76   17.50
   1  -9   2  400.16   15.30
   1  -9   2  375.86   14.00
   1  -9   2  419.86   17.20
   1   9   2  391.86   15.10
  -1   9  -2  420.86   15.30
   1   9   2  404.56   16.40
  -1   9  -2  367.76   15.10
   1   9   2  401.56   14.10
  -1   9  -2  378.76   11.80
  -1   9  -2  393.16   15.20
   2  -9   2   21.60    7.00
  -2  -9  -2   17.20    5.20
   2  -9   2   18.20    5.80
   2  -9   2    7.60    4.60
  -2  -9  -2   12.70    7.10
   2   9   2   13.10    4.70
  -2   9  -2   21.30    6.30
   2   9   2   16.70    5.30
  -2   9  -2    6.50    4.90
   2   9   2   18.60    5.40
  -2   9  -2   16.30    4.50
   3  -9   2  712.93   24.10
   3  -9   2  706.23   20.90
   3  -9   2  710.53   22.70
  -3  -9  -2  728.73   27.80
   3  -9   2  734.33   26.30
   3   9   2  710.53   24.80
   3   9   2  694.93   22.20
   3   9   2  691.13   22.20
   3   9   2  679.23   23.70
  -3   9  -2  657.53   24.30
  -3   9  -2  708.83   24.30
   4  -9   2  132.39   10.10
  -4  -9  -2  169.38   14.80
   4  -9   2  138.49    8.70
   4  -9   2  137.39   12.40
   4  -9   2  154.58   15.00
   4  -9   2  133.69   10.40
   4   9   2  139.49   11.00
  -4   9  -2  126.99   12.60
   4   9   2  126.79   10.80
  -4   9  -2  132.59   12.20
   4   9   2  147.99   10.80
   5  -9   2   14.90    6.30
   5  -9   2    7.90    8.80
   5  -9   2   19.00    8.30
   5  -9   2   24.50    5.20
  -5  -9  -2   20.40    9.70
  -5   9  -2   22.30    4.70
  -5   9  -2   28.20    8.30
  -5   9  -2   12.40    8.30
   5   9   2   11.60    6.20
   5   9   2   27.00    7.50
   5   9   2   28.00    7.60
  -6  -9  -2   -1.70    8.90
   6  -9   2   19.00   10.30
   6  -9   2    3.40    6.30
   6  -9   2   22.50    5.20
   6  -9   2    1.10    8.00
   6   9   2   10.50    6.40
  -6   9  -2    2.80    7.80
  -6   9  -2    7.80    8.40
   6   9   2    7.40    7.00
  -7  -9  -2   82.19   17.20
   7  -9   2   83.89   10.50
   7  -9   2  116.99   15.60
  -7   9  -2   88.09   14.80
   7   9   2  101.99   13.80
  -7   9  -2  102.49   15.40
   7   9   2   67.49   10.80
   8  -9   2   -1.60    9.60
  -8  -9  -2    6.00   11.90
   8  -9   2    3.90    7.30
   8  -9   2   -1.20    9.40
   8   9   2    6.40    8.70
  -8   9  -2    0.10   10.20
  -8   9  -2   -7.50    9.90
   8   9   2    4.80    8.40
   9  -9   2  189.38   21.40
   9  -9   2  222.78   23.60
   9  -9   2  183.48   17.20
  -9  -9  -2  204.88   26.40
  -9  -9  -2  152.38   23.20
   9   9   2  208.98   18.90
   9   9   2  212.88   19.90
  -9   9  -2  217.68   25.00
  -9   9  -2  225.48   25.30
 -10  -9  -2   -6.50   14.80
  10  -9   2   -5.50   11.60
  10  -9   2   11.70   14.00
 -10  -9  -2    9.60   15.70
  10  -9   2   -7.10    9.40
  10   9   2    3.20   11.20
  10   9   2   12.20   11.30
 -10   9  -2    8.00   15.70
 -10   9  -2   11.80   15.00
  10 -10  -2    2.10    6.40
  10 -10  -2   -8.80   10.70
  10 -10  -2    1.00   11.50
 -10 -10   2   21.10   14.10
 -10  10   2   -5.00   12.00
  10  10  -2    2.00    8.80
   9 -10  -2   24.50    6.90
   9 -10  -2    8.30   10.50
  -9 -10   2   26.50   13.70
   9 -10  -2   28.90   12.00
  -9  10   2   26.90   12.60
  -9  10   2    7.80   11.10
   9  10  -2   45.70    9.40
  -8 -10   2   68.19   16.50
   8 -10  -2   70.79   13.30
   8 -10  -2   80.89   12.30
   8 -10  -2   66.19   13.20
   8 -10  -2   69.59    8.50
   8  10  -2   66.69   10.10
  -8  10   2   84.39   14.30
  -8  10   2   64.79   13.00
   7 -10  -2  174.08   17.80
  -7 -10   2  187.48   21.60
   7 -10  -2  180.08   15.20
   7 -10  -2  177.28   18.70
   7 -10  -2  193.28   12.00
  -7  10   2  174.78   18.00
   7  10  -2  209.08   13.40
   7  10  -2  171.68   11.60
  -7  10   2  168.78   15.60
   6 -10  -2   46.80   10.40
   6 -10  -2   41.80    8.80
   6 -10  -2   33.90    9.90
  -6 -10   2   37.30   12.30
   6 -10  -2   25.10    5.60
   6 -10  -2   29.60    5.70
  -6  10   2   47.20    9.70
   6  10  -2   33.10    5.70
   6  10  -2   17.00    6.00
  -6  10   2   31.30    7.50
   5 -10  -2  160.98   13.90
   5 -10  -2  178.78    8.00
  -5 -10   2  175.38   18.90
   5 -10  -2  181.98   10.80
   5 -10  -2  172.78   10.50
   5 -10  -2  181.68   16.50
   5 -10  -2  181.18   15.00
   5  10  -2  170.98    8.50
  -5  10   2  190.08   12.00
   5  10  -2  169.68   10.80
  -5  10   2  200.78   14.10
   5  10  -2  177.18   11.70
   5  10  -2  207.88   14.90
   4 -10  -2  290.27   17.70
   4 -10  -2  321.07   10.30
   4 -10  -2  320.37   13.30
   4 -10  -2  350.16   16.70
   4 -10  -2  339.97   16.90
   4 -10  -2  305.67   13.40
  -4  10   2  325.27   16.20
   4  10  -2  327.07   14.40
  -4  10   2  333.17   13.90
   4  10  -2  320.07   10.10
   4  10  -2  310.17   16.60
   3 -10  -2  353.76   18.20
   3 -10  -2  389.06   16.80
   3 -10  -2  389.76   17.20
   3 -10  -2  367.56   14.40
  -3  10   2  393.26   13.40
  -3  10   2  379.06   16.30
   3  10  -2  379.06   15.80
   3  10  -2  372.06   14.50
   3  10  -2  359.56   16.60
   3  10  -2  369.16   15.20
   2 -10  -2  349.47   10.60
   2 -10  -2  363.76   14.70
   2 -10  -2  339.87   16.70
   2 -10  -2  343.47   12.10
   2 -10  -2  341.17   16.10
  -2 -10   2  369.36   14.10
   2  10  -2  370.56   15.40
  -2  10   2  354.06   15.70
  -2  10   2  334.27   11.20
   2  10  -2  378.66   14.30
   2  10  -2  351.66   14.90
  -2  10   2  361.36   14.80
  -1 -10   2  104.79    8.80
   1 -10  -2   99.79    9.10
  -1 -10   2  105.19    9.10
   1 -10  -2  109.79    8.70
   1 -10  -2   98.79    9.80
   1 -10  -2  102.79    9.70
  -1  10   2   91.99    8.60
  -1  10   2   98.09    8.90
  -1  10   2   94.79    8.20
  -1  10   2   98.99    6.00
   1  10  -2   96.59    8.40
   1  10  -2   97.29    8.70
   1  10  -2  106.39    9.30
   1  10  -2  100.89    8.40
   1  10  -2  106.49    5.10
   0 -10  -2   99.79    9.60
   0 -10   2   84.29    8.50
   0 -10  -2   81.19    8.30
   0 -10   2   87.39    7.90
   0 -10   2   84.49    6.50
   0 -10  -2   76.49    8.60
   0 -10  -2  106.89    9.00
   0  10  -2   77.79    7.00
   0  10   2   91.89    7.90
   0  10   2   81.69    7.70
   0  10  -2   84.99    8.20
   0  10   2   90.49    8.70
   0  10  -2   87.29    7.60
   0  10  -2   99.49    8.20
   1 -10   2    3.60    4.40
  -1 -10  -2   -2.90    5.30
  -1 -10  -2    4.90    3.80
   1 -10   2   -4.00    5.30
   1 -10   2    2.80    4.20
  -1 -10  -2   -2.10    4.60
   1  10   2    4.20    4.50
  -1  10  -2    0.60    4.20
   1  10   2    4.60    4.00
  -1  10  -2   -1.40    2.70
   1  10   2   -2.90    4.20
  -1  10  -2   -3.10    4.70
  -1  10  -2    4.50    3.90
   2 -10   2  432.96   16.80
   2 -10   2  444.46   19.30
   2 -10   2  439.06   16.90
  -2 -10  -2  432.36   20.10
  -2 -10  -2  443.06   12.60
  -2 -10  -2  423.46   17.20
   2  10   2  412.66   17.10
   2  10   2  427.76   17.70
  -2  10  -2  440.16   17.30
  -2  10  -2  441.46   17.50
  -2  10  -2  444.26   16.50
   2  10   2  440.56   15.70
   3 -10   2  509.55   19.80
  -3 -10  -2  510.75   23.30
  -3 -10  -2  488.45   18.40
   3 -10   2  493.25   17.20
   3 -10   2  488.95   21.90
   3 -10   2  504.05   18.80
   3  10   2  526.85   18.20
  -3  10  -2  540.15   20.50
   3  10   2  464.75   20.00
  -3  10  -2  520.95   20.70
   3  10   2  538.05   18.50
   3  10   2  534.05   20.20
   4 -10   2   22.90    6.00
   4 -10   2   21.50    8.10
   4 -10   2   13.70    4.70
   4 -10   2   24.90    7.10
  -4 -10  -2   17.40    8.40
  -4  10  -2   21.20    7.00
  -4  10  -2    4.10    6.20
   4  10   2   15.20    5.70
   4  10   2   28.60    6.40
   4  10   2   14.70    6.00
   5 -10   2  924.11   29.50
   5 -10   2  913.31   26.80
   5 -10   2  927.11   35.00
  -5 -10  -2  921.11   37.20
   5 -10   2  928.51   32.80
   5  10   2  902.31   30.80
   5  10   2  894.11   30.30
  -5  10  -2  884.01   33.80
   5  10   2  897.41   30.00
  -5  10  -2  852.61   32.60
  -6 -10  -2   41.70   12.80
   6 -10   2   55.39    9.30
   6 -10   2   43.80    6.80
   6 -10   2   45.30   10.70
   6 -10   2   56.69   12.40
   6  10   2   38.90    8.70
  -6  10  -2   48.80   11.20
   6  10   2   40.50    9.60
  -6  10  -2   57.29   11.40
  -7 -10  -2  -17.10   10.20
   7 -10   2    7.60    7.50
   7 -10   2   19.20   10.20
   7  10   2    1.00    7.00
  -7  10  -2    1.50    9.10
  -7  10  -2   -6.50    8.10
   7  10   2    6.40    8.20
   8 -10   2   64.89   11.00
   8 -10   2   83.99   15.00
  -8 -10  -2  120.49   20.10
   8 -10   2   97.49   16.20
   8  10   2   76.69   12.90
  -8  10  -2   85.69   15.70
   8  10   2  120.79   15.50
  -8  10  -2  103.59   17.50
  -9 -10  -2  -10.00   13.90
   9 -10   2    7.70    9.00
  -9 -10  -2    8.20   14.40
   9 -10   2   10.10   10.90
   9 -10   2   -2.50   10.30
  -9  10  -2   -6.90   12.40
  -9  10  -2    6.30   12.30
   9  10   2   -4.70    9.00
   9  10   2   -2.80    9.40
 -10 -10  -2   39.00   17.60
  10 -10   2   17.30   14.50
 -10 -10  -2   55.29   19.80
  10 -10   2   41.20   16.10
  10 -10   2   38.70   12.20
 -10  10  -2   30.40   16.40
 -10  10  -2   36.00   16.80
  10  10   2   47.30   13.20
  10 -11  -2   56.29   16.00
 -10 -11   2   41.70   16.90
  10 -11  -2   43.70    8.90
  10 -11  -2   85.19   18.30
  10  11  -2   66.89   12.50
 -10  11   2   90.39   16.80
   9 -11  -2   74.89   16.60
   9 -11  -2   66.49    9.70
   9 -11  -2   66.89   15.20
  -9 -11   2   30.50   15.40
  -9  11   2   89.99   16.60
  -9  11   2   71.09   13.70
   9  11  -2   70.69   11.10
  -8 -11   2  102.89   20.20
   8 -11  -2   78.99   14.30
   8 -11  -2  102.19   16.30
   8 -11  -2  106.59   13.30
   8 -11  -2   88.39    9.70
  -8  11   2  100.39   14.50
  -8  11   2  105.99   16.20
   8  11  -2  108.59   12.40
   7 -11  -2   39.20    7.40
  -7 -11   2   41.50   13.20
   7 -11  -2   39.80   11.00
   7 -11  -2   34.90    9.60
   7 -11  -2   42.50   11.80
  -7  11   2   28.00    9.20
   7  11  -2   45.50    8.30
  -7  11   2   43.80   10.50
   6 -11  -2  368.26   19.70
   6 -11  -2  359.96   21.50
  -6 -11   2  339.97   24.30
   6 -11  -2  353.76   22.70
   6 -11  -2  381.76   16.10
  -6  11   2  351.66   20.30
   6  11  -2  353.96   13.70
   6  11  -2  352.26   17.30
  -6  11   2  366.36   18.30
   5 -11  -2   18.90    5.10
   5 -11  -2   23.90    8.50
   5 -11  -2   31.90    6.40
   5 -11  -2   18.60    8.40
  -5 -11   2   40.10   11.60
   5 -11  -2   40.30    8.60
   5  11  -2   34.50    6.10
   5  11  -2   30.70    4.60
   5  11  -2   27.20    8.00
   5  11  -2   25.20    6.40
  -5  11   2   34.10    8.30
  -5  11   2   19.50    6.40
   4 -11  -2  199.78   11.60
   4 -11  -2  205.98   14.10
   4 -11  -2  208.08   15.90
   4 -11  -2  190.58   14.00
   4  11  -2  192.98   13.20
   4  11  -2  205.28   14.30
   4  11  -2  198.58   12.10
  -4  11   2  188.88   12.90
  -4  11   2  214.38   11.10
   3 -11  -2    4.90    2.40
   3 -11  -2   -2.90    4.90
   3 -11  -2   -0.80    3.40
   3 -11  -2   -2.90    3.90
   3 -11  -2   10.20    5.50
   3 -11  -2    1.60    5.10
  -3  11   2    5.60    3.70
  -3  11   2   -3.90    3.80
   3  11  -2   -0.10    4.40
   3  11  -2    2.50    3.70
  -3  11   2   -3.50    5.20
   3  11  -2    3.80    4.50
   2 -11  -2  172.38    8.50
   2 -11  -2  176.58   12.40
   2 -11  -2  175.58    7.10
  -2 -11   2  180.58   10.40
   2 -11  -2  180.28   11.10
   2 -11  -2  162.28   12.60
   2  11  -2  187.58   11.40
   2  11  -2  175.98   10.40
  -2  11   2  187.88   10.90
  -2  11   2  176.18    7.70
   2  11  -2  156.78   10.60
  -2  11   2  155.98   11.60
  -1 -11   2   76.09    7.80
   1 -11  -2   73.79    7.80
  -1 -11   2   70.09    7.90
   1 -11  -2   67.89    8.60
   1 -11  -2   68.29    7.70
   1 -11  -2   73.19    8.90
  -1  11   2   85.19    8.30
   1  11  -2   63.69    4.70
  -1  11   2   65.69    7.30
   1  11  -2   73.29    7.80
   1  11  -2   71.89    8.40
  -1  11   2   58.09    7.70
   1  11  -2   71.89    7.50
   1  11  -2   75.89    7.40
  -1  11   2   57.99    5.20
   0 -11  -2   58.39    7.70
   0 -11   2   57.99    8.20
   0 -11   2   63.19    7.60
   0 -11  -2   63.99    7.70
   0 -11  -2   61.69    8.20
   0 -11  -2   52.79    7.90
   0 -11   2   59.89    5.60
   0  11  -2   58.59    6.80
   0  11   2   62.19    7.10
   0  11   2   58.99    7.10
   0  11  -2   64.89    6.40
   0  11  -2   56.59    7.10
   0  11  -2   57.19    7.40
   0  11   2   55.39    7.30
   1 -11   2   12.50    5.80
   1 -11   2   -1.00    4.00
  -1 -11  -2   -0.50    5.70
   1 -11   2    1.90    4.30
  -1 -11  -2    1.10    4.90
  -1 -11  -2    1.00    4.00
   1  11   2    1.30    3.70
  -1  11  -2   -3.50    3.60
  -1  11  -2    0.90    4.20
   1  11   2   -4.30    4.10
  -1  11  -2    2.00    2.80
   1  11   2    2.40    4.40
  -1  11  -2    3.00    4.60
   2 -11   2  211.78   12.30
  -2 -11  -2  247.08   13.10
   2 -11   2  237.38   12.60
  -2 -11  -2  240.98    9.30
  -2 -11  -2  212.78   14.90
   2 -11   2  237.68   14.80
  -2  11  -2  241.78   12.80
  -2  11  -2  261.77   13.50
   2  11   2  245.88   11.70
  -2  11  -2  230.48   12.00
   2  11   2  250.27   13.50
   2  11   2  222.98   12.60
  -3 -11  -2   75.99    7.80
  -3 -11  -2   59.39   10.90
   3 -11   2   59.99   10.50
   3 -11   2   56.69    7.30
   3 -11   2   73.29    7.60
   3 -11   2   68.19    8.90
  -3  11  -2   69.79    9.00
  -3  11  -2   55.19    8.90
   3  11   2   79.69    7.90
   3  11   2   69.29    8.50
   3  11   2   78.09    9.70
   3  11   2   79.69    8.20
   4 -11   2  229.98   15.00
   4 -11   2  216.18   16.90
   4 -11   2  208.78   11.50
  -4 -11  -2  202.18   17.50
   4 -11   2  197.78   13.10
   4  11   2  195.78   13.90
  -4  11  -2  198.98   14.00
   4  11   2  192.48   12.50
  -4  11  -2  215.08   14.70
   4  11   2  220.18   12.30
   5 -11   2   13.10    6.40
   5 -11   2   -0.20    7.40
   5 -11   2    9.80    9.20
  -5 -11  -2   -0.80    7.90
   5 -11   2    8.10    4.90
   5  11   2   10.40    6.80
   5  11   2    7.00    6.50
   5  11   2   14.20    7.00
  -5  11  -2   -3.70    6.80
  -5  11  -2    2.20    7.30
   6 -11   2   22.20   10.00
   6 -11   2    6.80    6.60
   6 -11   2    9.60    8.50
   6 -11   2    3.80    5.20
  -6 -11  -2   -8.20    9.70
  -6  11  -2   -3.10    6.90
   6  11   2    4.10    6.80
   6  11   2   -1.80    6.60
  -6  11  -2    2.50    8.00
   7 -11   2   -6.30    6.70
   7 -11   2   -7.70    8.60
  -7 -11  -2  -13.90   10.80
   7  11   2    2.80    8.70
  -7  11  -2    5.30    8.70
  -7  11  -2   -6.40    8.50
   7  11   2    7.70    8.20
  -8 -11  -2    6.60   12.70
   8 -11   2   23.00    9.30
   8 -11   2    6.60   10.50
   8 -11   2   25.90   12.50
   8  11   2   33.80   10.70
   8  11   2   10.10    9.50
  -8  11  -2   14.70   11.10
  -8  11  -2    3.60   11.20
   9 -11   2   12.30   12.00
  -9 -11  -2    8.80   14.70
   9 -11   2   30.70   14.50
   9 -11   2    9.90    9.60
   9  11   2   38.60   12.80
  -9  11  -2   31.50   14.60
   9  11   2   11.00   10.70
  -9  11  -2   52.39   14.80
  10 -11   2  -10.80   12.30
  10 -11   2   19.70   15.10
 -10 -11  -2   19.20   17.30
 -10 -11  -2   27.40   16.90
  10 -11   2    7.70   10.20
 -10  11  -2    9.20   14.80
 -10  11  -2   14.80   16.10
  10  11   2   30.30   12.60
  10 -12  -2    9.90   12.50
  10 -12  -2   18.10    7.80
  10 -12  -2    9.90   13.00
 -10 -12   2   28.30   16.40
 -10  12   2   12.90   13.70
  10  12  -2   10.60   10.30
   9 -12  -2    5.50    6.70
   9 -12  -2   17.50   11.90
   9 -12  -2   26.00   13.40
  -9 -12   2   21.20   15.00
   9  12  -2   24.70    9.80
  -9  12   2   15.60   12.00
   8 -12  -2  273.67   23.20
   8 -12  -2  219.88   21.50
   8 -12  -2  223.08   14.50
   8 -12  -2  249.28   18.30
  -8 -12   2  202.88   25.40
   8  12  -2  261.77   17.60
  -8  12   2  271.17   21.50
  -8  12   2  260.97   19.50
   7 -12  -2    1.10    9.00
   7 -12  -2   -5.40    5.50
   7 -12  -2   18.80    8.80
   7 -12  -2   -0.50    9.30
  -7 -12   2   10.80   10.70
  -7  12   2   27.80    8.80
  -7  12   2    7.90    7.90
   7  12  -2    3.80    6.20
   6 -12  -2   56.49    8.20
  -6 -12   2   60.79   13.80
   6 -12  -2   55.89   11.70
   6 -12  -2   57.39   11.50
  -6  12   2   49.50   10.10
  -6  12   2   67.99   10.20
   6  12  -2   66.09    8.90
  -5 -12   2   30.60   11.90
   5 -12  -2    0.40    6.90
   5 -12  -2   14.30    5.60
   5 -12  -2   20.00    8.50
   5 -12  -2    7.80    8.80
   5  12  -2   18.80    6.20
   5  12  -2   15.30    3.90
   5  12  -2   11.90    7.70
  -5  12   2   19.00    7.40
  -5  12   2   10.20    5.70
   4 -12  -2   83.49   10.70
   4 -12  -2   89.19   11.30
   4 -12  -2  102.59    9.30
   4 -12  -2  106.49   12.70
  -4 -12   2  101.59   15.00
   4  12  -2   88.69    9.60
  -4  12   2  101.39   10.80
   4  12  -2   91.99   11.00
  -4  12   2   89.79    8.30
   4  12  -2   74.09    8.00
   4  12  -2  120.79   12.20
   3 -12  -2   46.70    8.60
   3 -12  -2   60.69    7.50
   3 -12  -2   61.49    8.50
   3 -12  -2   56.99    9.50
   3  12  -2   57.59    8.00
  -3  12   2   63.89    8.40
   3  12  -2   57.79    7.80
  -3  12   2   54.89    8.90
  -3  12   2   59.89    6.10
   3  12  -2   58.89    8.70
   2 -12  -2  325.57   16.30
  -2 -12   2  310.47   13.90
   2 -12  -2  301.97   14.50
   2 -12  -2  305.17   11.60
   2 -12  -2  284.17    9.90
   2 -12  -2  319.67   16.90
  -2 -12   2  302.27   13.30
  -2  12   2  298.77   15.00
   2  12  -2  303.17   14.80
  -2  12   2  308.37   10.90
   2  12  -2  306.27   13.90
  -2  12   2  329.67   14.00
   2  12  -2  310.27   14.60
  -2  12   2  306.67   14.60
  -1 -12   2   11.00    5.00
   1 -12  -2    8.20    4.90
  -1 -12   2    4.70    4.60
   1 -12  -2    2.60    4.60
   1 -12  -2    6.90    5.90
   1 -12  -2    4.80    5.30
  -1  12   2   14.80    5.30
   1  12  -2    5.30    4.50
  -1  12   2    6.70    4.60
   1  12  -2   10.90    4.60
  -1  12   2   10.70    4.90
   1  12  -2    7.00    4.40
   1  12  -2   -4.20    4.10
   1  12  -2    9.20    2.80
   0 -12  -2  292.87   14.10
   0 -12   2  286.27   10.90
   0 -12  -2  280.97   14.80
   0 -12  -2  292.77   14.70
   0 -12  -2  265.77   14.00
   0 -12   2  296.47   14.90
   0 -12   2  283.37   13.70
   0  12  -2  295.37   13.20
   0  12   2  270.67   14.40
   0  12   2  261.07   12.90
   0  12  -2  267.77   14.00
   0  12  -2  283.67   11.70
   0  12  -2  284.47   13.50
   0  12   2  274.07   12.60
   1 -12   2   56.29    9.00
  -1 -12  -2   72.49    8.10
  -1 -12  -2   56.09    9.00
  -1 -12  -2   57.09    6.70
   1 -12   2   59.09    7.70
   1 -12   2   58.19    6.90
  -1  12  -2   67.39    7.80
   1  12   2   59.59    7.80
   1  12   2   59.09    6.60
  -1  12  -2   55.99    7.30
  -1  12  -2   63.79    7.70
  -1  12  -2   58.69    5.10
   1  12   2   50.59    7.30
   2 -12   2 1848.02   48.80
  -2 -12  -2 1907.71   45.00
   2 -12   2 1886.31   49.50
  -2 -12  -2 1927.51   50.19
   2 -12   2 1882.01   52.89
  -2 -12  -2 1858.31   53.69
   2  12   2 1994.90   47.80
  -2  12  -2 1838.72   49.20
  -2  12  -2 1915.01   49.60
   2  12   2 1873.51   50.49
  -2  12  -2 1915.41   50.69
   2  12   2 1892.21   51.19
   3 -12   2   24.60    8.20
   3 -12   2   17.60    5.90
   3 -12   2   24.60    6.30
  -3 -12  -2   35.10    9.80
  -3 -12  -2   29.00    6.40
   3 -12   2   33.20    7.40
   3  12   2   12.00    6.40
  -3  12  -2   26.20    6.80
  -3  12  -2   22.60    6.80
   3  12   2   36.30    6.50
   3  12   2    8.40    5.10
   3  12   2   16.50    5.90
   4 -12   2  162.08   17.20
   4 -12   2  123.49   13.00
  -4 -12  -2  132.99   16.50
   4 -12   2  136.79   10.50
   4 -12   2  144.49   11.80
  -4  12  -2  119.89   12.70
  -4  12  -2  159.78   13.30
   4  12   2  132.49   12.70
   4  12   2  129.79   10.90
   4  12   2  151.48   11.60
   5 -12   2   -6.10    7.50
  -5 -12  -2   -1.60    9.30
   5 -12   2   -3.00    8.60
   5 -12   2   -3.40    5.90
   5 -12   2    8.60    5.20
   5  12   2   13.60    6.00
   5  12   2   -3.70    5.90
  -5  12  -2   -3.80    6.30
   5  12   2   -1.70    6.20
  -5  12  -2   -3.50    6.20
   6 -12   2  151.58   17.90
   6 -12   2  117.79   11.90
  -6 -12  -2  146.59   19.40
   6 -12   2  148.89   16.30
  -6  12  -2   96.79   14.00
  -6  12  -2  139.39   16.20
   6  12   2  142.39   14.20
   6  12   2  155.38   14.70
   7 -12   2   12.90    7.60
  -7 -12  -2   10.00   12.60
   7 -12   2    9.10   10.20
   7  12   2   14.10    8.80
  -7  12  -2   24.70   10.70
   7  12   2   14.20    9.20
  -7  12  -2   -1.30    8.90
   8 -12   2  207.38   22.00
  -8 -12  -2  161.38   23.40
   8 -12   2  204.58   22.00
   8 -12   2  198.18   16.50
  -8  12  -2  177.28   21.00
   8  12   2  193.58   19.10
  -8  12  -2  205.88   22.00
   8  12   2  196.18   18.40
   9 -12   2   13.90   12.90
   9 -12   2  -19.90   10.70
  -9 -12  -2   -3.40   13.40
   9 -12   2    6.30    9.30
  -9  12  -2   -3.00   12.60
   9  12   2    2.50   11.70
  -9  12  -2   -4.70   12.40
 -10 -12  -2  123.19   24.40
 -10 -12  -2  122.99   24.20
  10 -12   2  103.39   21.70
  10 -12   2  167.58   18.40
  10 -12   2  143.59   22.50
  10  12   2  193.78   20.80
 -10  12  -2  169.38   25.00
 -10  12  -2  181.88   25.70
 -10 -13   2   28.40   17.70
  10 -13  -2   51.59    9.90
  10 -13  -2   24.50   15.20
  10 -13  -2   41.30   14.80
 -10  13   2   71.29   17.10
  10  13  -2   55.49   13.10
  -9 -13   2   48.90   18.90
   9 -13  -2   34.30   13.10
   9 -13  -2   52.19    9.50
   9 -13  -2   38.10   14.60
  -9  13   2   40.20   12.80
   9  13  -2   64.59   12.70
   8 -13  -2   19.90    9.50
   8 -13  -2   27.50    7.50
  -8 -13   2   36.70   14.50
   8 -13  -2   28.50   11.90
   8 -13  -2   29.30   11.90
   8  13  -2   33.90    9.80
  -8  13   2   19.70   10.70
  -8  13   2   31.80   10.70
   7 -13  -2   19.60   10.40
   7 -13  -2    5.80    7.70
   7 -13  -2   15.10    6.80
  -7 -13   2    4.50   11.30
   7 -13  -2  -12.20    8.20
  -7  13   2   17.30    9.10
   7  13  -2   17.00    7.50
  -7  13   2   14.70    9.00
   6 -13  -2  108.99   14.40
   6 -13  -2  106.69   15.60
  -6 -13   2   83.79   15.80
   6 -13  -2  109.59   10.70
   6  13  -2   85.69   10.80
  -6  13   2   83.89   12.40
  -6  13   2   93.09   11.30
  -5 -13   2    6.50    9.50
   5 -13  -2   11.10    8.20
   5 -13  -2    8.70    7.50
   5 -13  -2   17.20    9.00
   5 -13  -2   10.70    6.10
   5  13  -2    6.10    6.00
  -5  13   2   13.20    7.00
  -5  13   2   22.60    6.50
   4 -13  -2  751.52   27.90
   4 -13  -2  703.13   27.30
   4 -13  -2  752.42   24.80
   4 -13  -2  750.32   30.80
  -4 -13   2  698.73   31.90
   4  13  -2  748.33   27.40
   4  13  -2  734.83   28.20
  -4  13   2  707.13   22.50
  -4  13   2  705.73   27.10
   4  13  -2  736.73   26.10
   3 -13  -2    9.20    6.30
   3 -13  -2    6.30    6.10
   3 -13  -2    5.30    6.30
  -3 -13   2    0.50    7.30
  -3 -13   2    9.10    4.60
   3  13  -2    5.10    4.90
  -3  13   2    6.10    5.00
  -3  13   2    1.20    5.20
  -3  13   2    8.10    4.00
   3  13  -2    9.20    5.70
   3  13  -2    8.50    5.30
  -2 -13   2  236.48   12.10
   2 -13  -2  236.78   13.30
  -2 -13   2  232.38   12.60
   2 -13  -2  216.38   14.60
   2 -13  -2  217.88    8.40
   2 -13  -2  193.98   10.00
   2 -13  -2  243.98   14.90
  -2  13   2  236.48   12.90
  -2  13   2  211.98    9.40
  -2  13   2  237.08   12.60
   2  13  -2  226.48   13.50
   2  13  -2  224.48   12.60
  -2  13   2  217.18   13.30
   2  13  -2  237.38   13.20
   1 -13  -2    8.80    5.10
  -1 -13   2   15.10    5.20
  -1 -13   2    3.80    5.10
   1 -13  -2   13.70    6.20
   1 -13  -2    2.20    5.50
   1 -13  -2   15.30    5.40
   1  13  -2   11.50    4.80
   1  13  -2   10.00    5.00
  -1  13   2   10.30    5.30
  -1  13   2    5.90    4.80
  -1  13   2   14.30    5.20
   1  13  -2   14.20    5.40
   1  13  -2   11.90    4.80
   1  13  -2    4.90    2.90
   0 -13  -2  164.48   11.40
   0 -13  -2  147.69   11.50
   0 -13   2  140.99   10.80
   0 -13  -2  137.49   11.70
   0 -13   2  114.99   10.60
   0 -13   2  151.48    7.90
   0 -13  -2  127.79   10.50
   0  13  -2  142.89    8.50
   0  13   2  145.39    9.80
   0  13   2  130.09    9.90
   0  13   2  139.99   11.20
   0  13  -2  119.99    9.30
   0  13  -2  151.78   11.10
   0  13  -2  143.59   10.10
   0  13  -2  135.19    8.30
  -1 -13  -2  127.09    9.40
  -1 -13  -2  126.49   12.70
   1 -13   2  138.39   11.70
   1 -13   2  115.39   10.60
   1 -13   2  101.19    8.40
  -1 -13  -2  131.09   10.70
  -1  13  -2  123.39    6.80
   1  13   2  130.99    8.70
  -1  13  -2  136.59    9.90
   1  13   2  122.09    9.60
   1  13   2  131.79   11.00
  -1  13  -2  123.19   10.20
  -1  13  -2  127.39   10.00
   2 -13   2  165.18   11.10
  -2 -13  -2  165.98   14.30
   2 -13   2  159.58   14.10
   2 -13   2  154.98   11.70
  -2 -13  -2  177.38   12.20
  -2 -13  -2  161.98    8.90
  -2  13  -2  185.28   11.90
   2  13   2  174.78   10.40
  -2  13  -2  185.98   11.70
   2  13   2  168.08   11.60
  -2  13  -2  152.68   11.50
   2  13   2  178.38   12.70
   3 -13   2  151.68   15.90
   3 -13   2  180.98   12.00
  -3 -13  -2  178.38   17.60
   3 -13   2  168.48   12.20
   3 -13   2  159.98   12.40
  -3 -13  -2  172.38   12.10
   3  13   2  163.98   13.00
  -3  13  -2  166.88   12.30
   3  13   2  171.08   11.00
   3  13   2  180.78   10.70
  -3  13  -2  160.18   11.00
  -3  13  -2  167.18   12.70
   3  13   2  169.58   13.30
   4 -13   2   29.80   11.00
   4 -13   2   22.70    7.90
   4 -13   2   29.70    7.50
  -4 -13  -2   28.90   11.30
   4 -13   2   24.40    6.60
   4  13   2   31.00    8.90
   4  13   2   38.00    8.30
  -4  13  -2   31.80    8.90
  -4  13  -2   28.90    8.50
   4  13   2   38.80    7.70
   4  13   2   33.80    7.70
  -5 -13  -2   77.19   15.50
   5 -13   2   92.69   14.70
   5 -13   2  117.49   14.10
   5 -13   2   92.39   10.70
   5 -13   2   92.89   10.00
  -5  13  -2   97.09   13.00
   5  13   2   97.59   11.60
   5  13   2   96.59   12.50
  -5  13  -2   86.99   12.20
   5  13   2   99.29   11.40
   6 -13   2   12.90    8.90
  -6 -13  -2    3.30   11.30
   6 -13   2   12.80    6.10
   6 -13   2   19.10   10.70
   6 -13   2    0.10    6.90
   6  13   2    5.40    8.00
   6  13   2    6.10    7.20
  -6  13  -2   16.10    9.10
  -6  13  -2    0.80    7.50
   7 -13   2   73.79   11.30
   7 -13   2   87.19   14.90
  -7 -13  -2   73.89   17.60
   7  13   2   85.59   13.20
  -7  13  -2   62.29   13.60
   7  13   2  102.09   14.30
  -7  13  -2   87.09   15.00
   8 -13   2   67.29   15.30
   8 -13   2   80.29   16.00
   8 -13   2   45.40   11.40
  -8 -13  -2   70.79   18.20
  -8  13  -2   51.79   14.30
   8  13   2   56.39   12.00
  -8  13  -2   32.70   13.70
   8  13   2   67.99   13.30
   9 -13   2  117.49   20.70
   9 -13   2  107.09   14.00
   9 -13   2  105.59   19.50
  -9 -13  -2   99.59   20.80
  -9  13  -2  103.49   19.20
   9  13   2  133.59   18.20
  -9  13  -2  130.59   20.70
 -10 -13  -2    9.70   16.40
  10 -13   2   10.60   15.20
  10 -13   2   -0.80   14.80
  10 -13   2   -1.30   10.30
 -10 -13  -2   -1.60   16.40
 -10  13  -2   13.20   16.60
  10  13   2   19.20   14.10
 -10  13  -2   17.70   15.50
 -10 -14   2   -7.40   14.70
  10 -14  -2   14.20    8.70
  10 -14  -2   22.20   14.50
  10 -14  -2   -0.90   12.80
 -10  14   2   27.00   15.40
  10  14  -2   21.00   12.00
   9 -14  -2    0.80   12.30
   9 -14  -2    9.00    7.10
   9 -14  -2   18.90   12.70
  -9 -14   2    7.50   14.50
  -9  14   2    4.60   10.30
   9  14  -2   12.10   10.20
  -8 -14   2   60.29   16.90
   8 -14  -2   60.69    9.70
   8 -14  -2   46.30   13.50
   8 -14  -2   54.19   11.30
   8 -14  -2   48.40   13.70
   8  14  -2   64.69   11.70
  -8  14   2   47.90   12.40
  -7 -14   2   53.69   15.70
   7 -14  -2   59.49   14.30
   7 -14  -2   83.29   14.70
   7 -14  -2   70.29   12.20
   7 -14  -2   68.29    9.80
  -7  14   2   66.39   10.90
   7  14  -2   83.99   12.20
  -7  14   2   87.69   13.70
   6 -14  -2   14.50    9.80
   6 -14  -2    5.30    6.80
   6 -14  -2    7.70    8.70
   6 -14  -2   19.70    9.00
  -6 -14   2   13.30   11.00
   6  14  -2    6.90    7.00
  -6  14   2    7.10    7.10
  -6  14   2   12.80    7.60
   5 -14  -2  592.74   22.70
   5 -14  -2  627.24   27.00
   5 -14  -2  662.33   27.80
   5 -14  -2  603.44   29.40
  -5 -14   2  591.34   30.70
  -5  14   2  607.94   22.30
   5  14  -2  601.14   24.90
  -5  14   2  597.94   26.20
   4 -14  -2    1.20    7.10
  -4 -14   2   11.60    5.10
  -4 -14   2    5.40    9.80
   4 -14  -2    9.80    7.30
   4 -14  -2   13.40    8.70
   4 -14  -2    1.10    5.90
  -4  14   2    7.50    6.50
  -4  14   2    3.90    5.30
   4  14  -2    9.40    7.30
  -4  14   2   14.90    7.70
   4  14  -2   10.90    6.10
  -3 -14   2  481.45   18.10
  -3 -14   2  503.55   25.50
   3 -14  -2  518.35   22.50
   3 -14  -2  491.95   23.50
   3  14  -2  471.35   20.60
  -3  14   2  483.25   21.50
   3  14  -2  453.45   20.80
  -3  14   2  489.95   16.10
  -3  14   2  520.05   20.80
   3  14  -2  500.35   20.80
   2 -14  -2    3.00    5.00
  -2 -14   2    4.00    4.70
   2 -14  -2   -3.40    5.60
   2 -14  -2   -2.00    4.30
  -2 -14   2   -0.80    6.90
   2 -14  -2   -0.40    3.10
   2 -14  -2   -4.10    5.60
  -2 -14   2   -2.70    5.10
  -2  14   2    1.10    5.60
  -2  14   2   -4.40    4.30
  -2  14   2    1.30    4.60
   2  14  -2   -4.50    4.30
   2  14  -2    3.00    5.10
   2  14  -2    8.10    5.10
  -2  14   2    3.10    3.30
   1 -14  -2  141.99   10.50
   1 -14  -2  138.79   12.10
  -1 -14   2  134.09   10.50
   1 -14  -2  138.89   12.50
  -1 -14   2  119.99   10.60
   1 -14  -2  137.69   11.70
  -1  14   2  137.69   10.50
   1  14  -2  129.79    6.80
   1  14  -2  135.19    9.90
  -1  14   2  129.49   10.50
   1  14  -2  123.89   10.20
  -1  14   2  123.99   10.80
   1  14  -2  149.69   11.40
   1  14  -2  130.69   10.10
   0 -14  -2   81.09    9.70
   0 -14  -2  100.99   11.00
   0 -14   2  101.49   10.30
   0 -14   2  109.59   11.00
   0 -14  -2   99.69   10.00
   0 -14  -2  102.09   10.70
   0  14   2   98.29    9.50
   0  14  -2  110.19    8.10
   0  14  -2   94.39    9.20
   0  14  -2  104.49    9.30
   0  14  -2  111.69   10.70
   0  14  -2   96.39    7.50
   0  14   2   89.89    9.80
   0  14   2  108.59    9.00
   1 -14   2    9.60    4.50
   1 -14   2   19.90    6.00
  -1 -14  -2   17.30    6.20
   1 -14   2   23.80    7.20
  -1 -14  -2   18.70    7.40
  -1 -14  -2   16.00    5.40
   1 -14   2   20.90    5.30
   1  14   2   13.40    5.50
  -1  14  -2   18.30    5.60
   1  14   2   23.50    5.30
  -1  14  -2   19.10    5.80
  -1  14  -2   18.10    5.50
   1  14   2    6.70    5.30
   2 -14   2  576.04   16.40
   2 -14   2  589.34   25.20
  -2 -14  -2  606.44   19.10
   2 -14   2  633.34   23.10
  -2 -14  -2  628.14   23.60
   2 -14   2  625.34   21.90
  -2 -14  -2  614.14   26.60
  -2  14  -2  629.04   23.40
   2  14   2  633.24   20.70
   2  14   2  613.44   24.30
   2  14   2  634.34   23.60
  -2  14  -2  630.54   22.50
  -2  14  -2  605.34   22.50
   3 -14   2   68.09    9.80
  -3 -14  -2   63.89    9.00
   3 -14   2   68.89   11.90
   3 -14   2   69.89    9.20
  -3 -14  -2   99.79   14.40
   3 -14   2   83.69    9.60
   3  14   2   51.89    9.60
  -3  14  -2   76.89   10.00
  -3  14  -2   59.59    9.70
   3  14   2   71.99    8.70
   3  14   2   88.29    9.20
   3  14   2   67.29   10.00
   4 -14   2  221.48   14.00
   4 -14   2  227.18   15.10
  -4 -14  -2  220.18   21.40
   4 -14   2  245.48   16.60
   4 -14   2  205.58   18.70
   4  14   2  208.18   12.90
   4  14   2  203.38   16.10
  -4  14  -2  222.68   15.40
   4  14   2  240.08   17.20
  -4  14  -2  197.58   15.20
   4  14   2  206.48   13.30
   5 -14   2  218.38   17.90
   5 -14   2  185.08   14.90
   5 -14   2  195.48   19.90
   5 -14   2  215.78   13.70
  -5 -14  -2  167.18   21.00
   5  14   2  214.28   14.50
   5  14   2  217.88   17.40
   5  14   2  222.18   14.50
  -5  14  -2  205.98   16.90
  -5  14  -2  205.68   16.60
  -6 -14  -2    4.70   11.70
   6 -14   2   26.70    8.00
   6 -14   2   21.10    7.20
   6 -14   2   -9.20    8.80
   6 -14   2   11.00    9.50
   6  14   2    8.60    8.10
  -6  14  -2   15.80    9.90
  -6  14  -2   25.70    9.60
   6  14   2   37.80    8.90
   7 -14   2   46.60   12.90
   7 -14   2   33.90    9.40
  -7 -14  -2   56.39   16.30
   7  14   2   52.29   11.50
  -7  14  -2   49.10   12.70
   7  14   2   17.00   10.00
  -7  14  -2   62.49   14.10
   8 -14   2   91.39   17.20
   8 -14   2   98.39   17.90
  -8 -14  -2  100.69   19.70
   8 -14   2   76.09   12.10
  -8  14  -2   70.59   15.10
   8  14   2  107.59   16.10
  -8  14  -2   54.69   14.80
   9 -14   2   20.40   14.90
   9 -14   2   15.60   14.10
  -9 -14  -2   15.40   15.00
   9 -14   2   19.80    9.80
  -9  14  -2    3.70   12.60
   9  14   2   11.60   13.30
  -9  14  -2  -10.60   13.60
 -10 -14  -2   14.70   17.60
  10 -14   2  -18.40   13.70
  10 -14   2   21.60   10.80
 -10  14  -2   -1.30   14.90
  10  14   2    6.00   14.20
  10 -15  -2  -10.10   13.30
 -10 -15   2    1.90   17.10
  10 -15  -2   -8.30    7.90
  10 -15  -2   10.50   13.30
  10  15  -2   15.10   13.20
 -10  15   2   -9.50   12.60
   9 -15  -2   -9.40    7.80
   9 -15  -2   20.40   13.00
  -9 -15   2   -5.10   13.20
   9 -15  -2    0.30   12.00
  -9  15   2  -10.80   10.10
   9  15  -2  -11.50   10.40
   8 -15  -2   33.60   12.90
   8 -15  -2   42.10   10.10
   8 -15  -2   35.90   11.30
  -8 -15   2   29.90   15.00
   8 -15  -2   58.29   14.70
  -8  15   2   35.80   11.70
   8  15  -2   47.00   11.50
  -7 -15   2   53.99   16.20
   7 -15  -2   45.00   13.60
   7 -15  -2   61.19   10.20
   7 -15  -2   64.99   11.70
   7 -15  -2   62.79   13.20
  -7  15   2   48.20   11.50
   7  15  -2   59.39   11.30
   6 -15  -2    1.50    6.10
  -6 -15   2   14.10   10.40
   6 -15  -2   -5.40    8.10
   6 -15  -2   -0.90    9.00
   6 -15  -2    1.80    7.40
  -6  15   2    3.90    7.60
   6  15  -2   -5.20    6.20
  -6  15   2   11.10    8.00
   5 -15  -2  176.78   13.80
   5 -15  -2  181.68   18.90
  -5 -15   2  203.58   21.20
   5 -15  -2  186.08   17.00
   5 -15  -2  170.58   16.90
   5  15  -2  192.38   15.20
  -5  15   2  182.68   16.10
  -5  15   2  169.78   12.70
  -4 -15   2   -2.40    5.00
   4 -15  -2    2.20    6.90
   4 -15  -2    0.70    8.20
   4 -15  -2   -2.70    7.10
   4 -15  -2   -4.90    6.40
  -4 -15   2    6.50   10.10
  -4  15   2    2.70    7.20
  -4  15   2    0.90    4.60
   4  15  -2   -4.40    6.50
   4  15  -2    0.50    6.00
  -4  15   2   -3.30    6.00
   3 -15  -2    3.10    7.20
  -3 -15   2    9.30    5.20
   3 -15  -2   10.40    5.80
  -3 -15   2    6.80    8.80
   3 -15  -2    6.10    7.10
   3  15  -2    3.80    5.70
  -3  15   2   13.30    4.60
   3  15  -2   -1.20    5.80
  -3  15   2   16.80    6.20
  -3  15   2    2.30    6.80
   2 -15  -2   -8.40    4.80
   2 -15  -2   -3.90    6.40
  -2 -15   2    1.00    5.50
  -2 -15   2   -1.10    7.30
   2 -15  -2    2.70    6.60
  -2 -15   2    0.60    5.20
  -2  15   2    6.60    3.60
   2  15  -2   -5.00    4.30
  -2  15   2    5.80    4.90
  -2  15   2   -5.00    5.20
   2  15  -2   -4.00    4.80
   2  15  -2   -0.50    5.30
  -2  15   2   -0.50    5.00
  -1 -15   2  512.45   22.50
   1 -15  -2  496.75   21.90
   1 -15  -2  526.95   19.40
   1 -15  -2  508.55   21.60
   1 -15  -2  514.75   22.00
  -1 -15   2  489.45   20.30
  -1 -15   2  528.75   20.80
   1  15  -2  497.75   15.30
   1  15  -2  515.45   19.30
  -1  15   2  513.15   20.20
   1  15  -2  482.85   21.00
   1  15  -2  485.05   20.30
  -1  15   2  551.14   20.70
  -1  15   2  506.35   21.20
   1  15  -2  503.65   19.50
   0 -15  -2   22.90    7.00
   0 -15   2   32.80    6.70
   0 -15  -2   21.00    6.50
   0 -15   2   23.50    7.40
   0 -15  -2   36.10    8.10
   0 -15  -2   44.40    8.30
   0 -15   2   18.20    6.30
   0  15  -2   27.80    6.60
   0  15   2   25.90    6.50
   0  15  -2   21.50    6.20
   0  15   2   19.70    6.50
   0  15   2   23.10    5.90
   0  15  -2   23.20    6.00
   0  15  -2   24.40    5.40
   1 -15   2  362.46   14.90
   1 -15   2  360.06   14.50
   1 -15   2  367.46   19.60
  -1 -15  -2  391.06   16.50
   1 -15   2  381.06   17.80
  -1 -15  -2  417.46   18.80
  -1 -15  -2  392.66   19.90
   1  15   2  376.36   15.40
   1  15   2  345.07   18.00
  -1  15  -2  372.36   18.00
  -1  15  -2  394.56   17.40
   1  15   2  344.97   17.20
  -1  15  -2  382.66   16.80
  -2 -15  -2  287.37   16.00
  -2 -15  -2  287.17   12.70
  -2 -15  -2  256.67   17.90
   2 -15   2  276.37   16.20
   2 -15   2  292.37   14.90
   2 -15   2  289.67   18.00
  -2  15  -2  269.27   15.30
  -2  15  -2  279.17   15.40
   2  15   2  305.27   17.20
   2  15   2  298.67   13.70
   2  15   2  286.37   16.00
  -2  15  -2  291.47   15.40
  -3 -15  -2  201.38   18.60
   3 -15   2  220.98   18.00
   3 -15   2  225.88   15.10
   3 -15   2  210.28   15.10
   3 -15   2  225.48   14.90
   3  15   2  235.18   13.00
   3  15   2  215.68   12.20
  -3  15  -2  215.18   14.10
  -3  15  -2  212.78   15.00
   3  15   2  235.98   16.50
   3  15   2  201.48   15.40
   4 -15   2   51.29    9.40
   4 -15   2   41.80   11.40
  -4 -15  -2   37.70   12.50
   4 -15   2   39.20    8.10
   4 -15   2   30.80    9.80
   4  15   2   41.50    9.70
   4  15   2   52.29    8.20
  -4  15  -2   34.80    9.00
   4  15   2   37.40   10.10
  -4  15  -2   34.60    9.10
   4  15   2   34.80    8.20
   5 -15   2   68.09   10.80
   5 -15   2   66.69   13.60
   5 -15   2   51.99   11.50
  -5 -15  -2   73.79   16.10
   5 -15   2   68.99   10.10
   5  15   2   71.89   12.10
   5  15   2   57.89    9.80
  -5  15  -2   57.89   11.50
  -5  15  -2   54.19   11.20
   5  15   2   73.49   10.50
   6 -15   2    3.00    7.60
   6 -15   2   10.20   10.00
   6 -15   2    1.20    9.60
  -6 -15  -2    7.20   11.90
   6 -15   2   -4.20    6.60
   6  15   2   -2.90    7.20
  -6  15  -2    9.80    8.70
   6  15   2    0.40    7.80
  -6  15  -2    3.20    9.10
  -7 -15  -2  223.78   26.30
   7 -15   2  214.58   17.90
   7 -15   2  216.48   21.60
  -7  15  -2  223.78   20.10
   7  15   2  241.08   20.40
  -7  15  -2  198.48   20.30
   8 -15   2    0.20    8.80
  -8 -15  -2   -0.10   12.90
   8 -15   2    5.60   11.80
   8 -15   2   -3.70   11.00
  -8  15  -2    4.90   11.00
  -8  15  -2  -13.90   10.60
   8  15   2    6.60   11.20
   9 -15   2  249.97   27.20
  -9 -15  -2  271.17   32.30
   9 -15   2  257.47   27.20
   9 -15   2  259.17   21.10
   9  15   2  300.87   26.20
  -9  15  -2  296.97   26.70
  -9  15  -2  284.07   28.00
  -9 -16   2   48.20   18.60
   9 -16  -2   90.59   18.10
   9 -16  -2   43.40   16.00
   9 -16  -2   47.00   11.50
  -9  16   2   81.99   15.90
   9  16  -2   95.29   15.50
  -8 -16   2   19.00   16.60
   8 -16  -2   73.49   17.10
   8 -16  -2   47.10   10.40
   8 -16  -2   55.79   15.00
   8 -16  -2   45.40   12.50
  -8  16   2   20.80   10.50
   8  16  -2   58.29   12.80
   7 -16  -2  212.08   21.70
   7 -16  -2  182.08   18.20
  -7 -16   2  160.18   23.60
   7 -16  -2  180.18   21.20
   7 -16  -2  193.78   15.70
  -7  16   2  213.28   19.20
   7  16  -2  195.68   17.80
   6 -16  -2   44.60    9.20
   6 -16  -2   45.20   11.10
   6 -16  -2   35.90   11.50
  -6 -16   2   19.40   12.70
   6 -16  -2   31.20   12.30
   6  16  -2   26.90    9.50
  -6  16   2   58.89   12.00
   5 -16  -2  417.26   26.00
   5 -16  -2  433.26   23.50
   5 -16  -2  435.66   23.40
   5 -16  -2  433.86   21.00
  -5 -16   2  447.76   27.50
  -5  16   2  433.06   22.80
  -5  16   2  433.16   18.30
  -5  16   2  425.96   23.80
   5  16  -2  458.85   22.80
  -4 -16   2   79.59   15.00
   4 -16  -2   86.99   13.00
  -4 -16   2   96.69    9.40
   4 -16  -2   72.99   13.00
  -4  16   2   78.79    8.30
   4  16  -2   74.99   10.90
  -4  16   2  100.79   12.30
  -4  16   2   74.69   11.10
   4  16  -2   67.89   11.10
   3 -16  -2   54.69   11.10
   3 -16  -2   75.59   11.50
  -3 -16   2   62.69    8.80
  -3 -16   2   55.59   12.10
   3 -16  -2   66.49    9.90
   3  16  -2   77.59   10.60
  -3  16   2   70.99   10.90
  -3  16   2   63.69    9.90
   3  16  -2   77.59   10.90
  -3  16   2   75.09    7.50
   2 -16  -2  142.39   14.80
  -2 -16   2  153.98   16.20
  -2 -16   2  139.29   12.00
   2 -16  -2  148.89    9.70
   2 -16  -2  146.89   14.40
   2 -16  -2  162.28   13.50
  -2 -16   2  136.59   13.00
  -2  16   2  163.88    9.40
   2  16  -2  155.28   12.60
  -2  16   2  144.39   13.40
   2  16  -2  155.38   13.60
  -2  16   2  149.88   12.10
   1 -16  -2   -7.10    6.00
  -1 -16   2    5.00    5.60
   1 -16  -2    2.20    6.30
  -1 -16   2    0.60    6.40
   1 -16  -2   -0.30    5.80
  -1 -16   2   14.10    6.60
   1 -16  -2    4.00    5.40
  -1  16   2    1.20    5.40
  -1  16   2    1.90    5.10
   1  16  -2    2.50    5.60
   1  16  -2    3.80    5.30
   1  16  -2    3.10    3.60
  -1  16   2   -8.00    4.80
   1  16  -2    4.30    5.40
   0 -16  -2  283.57   16.00
   0 -16   2  248.38   13.90
   0 -16  -2  255.17   16.70
   0 -16  -2  247.98   15.80
   0 -16   2  257.57   16.30
   0 -16  -2  274.87   16.00
   0 -16   2  266.37   15.60
   0  16  -2  244.08   14.00
   0  16   2  246.38   13.90
   0  16   2  234.28   14.00
   0  16  -2  247.18   15.90
   0  16   2  265.87   16.40
   0  16  -2  269.17   14.50
   0  16  -2  272.77   12.20
   1 -16   2    4.80    5.50
   1 -16   2   -1.20    7.10
   1 -16   2    1.90    4.70
   1 -16   2   10.70    6.90
  -1 -16  -2   -1.30    5.40
  -1 -16  -2   -2.40    5.20
  -1 -16  -2   -1.50    7.40
   1  16   2   11.80    6.10
  -1  16  -2    5.40    5.50
   1  16   2    5.90    4.80
  -1  16  -2   -1.50    5.60
  -1  16  -2    6.30    5.00
   1  16   2    1.00    5.70
   2 -16   2   88.49   11.20
  -2 -16  -2  100.99   13.80
   2 -16   2  120.69   11.20
  -2 -16  -2  121.19   11.80
   2 -16   2  104.79   11.20
   2 -16   2  105.19   13.60
  -2 -16  -2  103.89    9.40
   2  16   2   86.39   10.70
  -2  16  -2  117.29   11.30
   2  16   2  115.89   10.00
  -2  16  -2  120.19   11.90
  -2  16  -2  105.79   11.10
   2  16   2   99.49   12.10
   3 -16   2  131.99   16.30
   3 -16   2  117.49   12.30
   3 -16   2  143.89   13.50
  -3 -16  -2  142.59   17.80
   3 -16   2  127.09   12.90
   3  16   2  133.59   14.40
   3  16   2  134.49   11.10
  -3  16  -2  126.59   13.00
   3  16   2  135.39   10.70
  -3  16  -2  123.59   12.10
   3  16   2  134.89   13.70
   4 -16   2  238.38   16.80
   4 -16   2  164.98   18.50
   4 -16   2  223.58   16.80
   4 -16   2  221.38   15.60
  -4 -16  -2  242.98   20.90
  -4  16  -2  217.68   15.70
   4  16   2  224.28   17.80
   4  16   2  224.58   13.90
   4  16   2  226.38   18.40
  -4  16  -2  208.48   16.80
   4  16   2  231.58   13.10
   5 -16   2   29.00    9.00
   5 -16   2   -2.20    9.20
   5 -16   2   12.50    9.50
  -5 -16  -2   25.50   12.00
   5 -16   2    6.70    7.20
   5  16   2   11.40    7.30
  -5  16  -2   20.60    9.30
  -5  16  -2    5.50    8.00
   5  16   2   18.10    9.40
   5  16   2   22.40    7.70
   6 -16   2   54.09   10.70
   6 -16   2   78.89   14.40
   6 -16   2   52.29   14.30
   6 -16   2   58.99   10.50
  -6 -16  -2   75.49   17.20
  -6  16  -2   38.60   11.70
   6  16   2   58.49   10.40
  -6  16  -2   72.49   13.60
   6  16   2   77.89   13.60
   7 -16   2  107.29   17.00
  -7 -16  -2   84.29   18.70
   7 -16   2  104.79   14.20
  -7  16  -2  109.79   16.60
   7  16   2  121.49   17.00
  -7  16  -2   82.89   15.30
   8 -16   2   56.09   15.80
   8 -16   2   65.49   13.00
  -8 -16  -2   37.70   18.20
   8 -16   2   53.19   15.90
  -8  16  -2   74.89   16.20
   8  16   2   81.19   16.40
  -8  16  -2   33.90   13.70
   9 -16   2  -14.40    9.80
   9 -16   2   24.70   14.80
   9 -16   2   33.30   15.30
  -9 -16  -2    8.10   15.30
  -9  16  -2  -16.10   13.50
  -9  16  -2    3.30   14.60
   9  16   2    8.20   13.90
   9 -17  -2   30.90   14.30
   9 -17  -2   60.39   11.30
  -9 -17   2   13.80   18.10
   9 -17  -2   37.60   16.10
   9  17  -2   25.50   13.20
  -9  17   2   16.70   13.30
  -8 -17   2    8.20   15.00
   8 -17  -2   16.50    8.50
   8 -17  -2   -8.40   10.00
   8 -17  -2    5.70   12.00
   8 -17  -2   10.40   11.60
   8  17  -2   -4.00    9.30
  -8  17   2  -10.20    9.70
   7 -17  -2   -2.10    7.40
  -7 -17   2    1.90   12.80
   7 -17  -2    9.30   11.10
   7 -17  -2    7.40   11.20
   7  17  -2    1.90    9.00
  -7  17   2   -4.60    8.20
   6 -17  -2  280.67   24.60
   6 -17  -2  281.97   21.40
   6 -17  -2  298.77   18.60
   6 -17  -2  270.67   21.40
  -6 -17   2  289.17   25.20
  -6  17   2  278.07   21.30
  -6  17   2  291.37   20.80
   6  17  -2  262.57   19.80
   5 -17  -2  195.98   18.10
   5 -17  -2  142.79   17.90
  -5 -17   2  169.28   20.30
   5 -17  -2  207.68   17.90
   5 -17  -2  178.18   15.80
  -5  17   2  162.48   16.00
   5  17  -2  195.08   17.30
   5  17  -2  177.68   17.40
  -5  17   2  175.18   18.10
  -5  17   2  198.48   12.80
  -4 -17   2   61.79    9.00
   4 -17  -2   55.19   11.70
  -4 -17   2   65.79   13.60
   4 -17  -2   61.79   13.30
   4  17  -2   62.69   10.60
   4  17  -2   60.39   11.40
  -4  17   2   63.89   10.50
  -4  17   2   71.39   11.90
  -4  17   2   72.89    8.10
   3 -17  -2   -2.70    6.50
  -3 -17   2    2.80    6.40
   3 -17  -2   -4.30    7.60
  -3 -17   2   11.50    9.30
   3 -17  -2    0.40    8.00
  -3  17   2    0.10    7.10
  -3  17   2    3.00    4.90
   3  17  -2    1.60    6.10
   3  17  -2    3.90    7.00
  -3  17   2    9.60    6.50
  -2 -17   2    4.80    6.30
  -2 -17   2    8.70    8.50
   2 -17  -2    2.20    7.60
   2 -17  -2    3.50    8.00
   2 -17  -2    1.60    4.80
   2 -17  -2    9.70    6.70
  -2  17   2    0.60    6.40
  -2  17   2    9.60    6.40
  -2  17   2   -3.10    4.40
   2  17  -2   -0.10    6.10
   2  17  -2   -1.90    6.20
   1 -17  -2  154.78   15.10
   1 -17  -2  131.29   13.30
  -1 -17   2  151.58   13.50
   1 -17  -2  165.28   11.90
   1 -17  -2  117.59   13.20
  -1 -17   2  157.78   14.00
  -1 -17   2  158.68   13.30
  -1  17   2  132.89   12.30
   1  17  -2  133.69   12.00
   1  17  -2  126.99    8.10
   1  17  -2  132.89   13.10
  -1  17   2  129.29   12.30
  -1  17   2  141.59   13.30
   0 -17  -2   -2.20    6.40
   0 -17   2   12.00    7.10
   0 -17   2    4.60    5.90
   0 -17  -2   16.10    7.70
   0 -17  -2   -0.40    6.00
   0 -17   2    1.60    6.90
   0 -17  -2   24.70    8.00
   0  17  -2    8.00    6.30
   0  17  -2    9.00    5.60
   0  17  -2    3.60    4.60
   0  17   2    9.00    6.60
   0  17   2    5.20    5.80
   0  17   2    6.30    6.00
   0  17  -2   -0.80    5.90
   1 -17   2  246.98   16.20
  -1 -17  -2  233.78   17.90
   1 -17   2  253.57   17.90
   1 -17   2  236.18   13.00
   1 -17   2  270.87   13.40
  -1 -17  -2  267.47   14.90
  -1 -17  -2  240.38   16.40
  -1  17  -2  244.68   14.70
   1  17   2  248.88   15.70
  -1  17  -2  243.88   15.10
   1  17   2  249.08   13.00
   1  17   2  260.07   16.90
  -1  17  -2  249.08   13.60
  -1  17  -2  253.17   16.00
   2 -17   2   64.79   10.00
   2 -17   2   66.99    9.50
  -2 -17  -2   59.69    9.40
   2 -17   2   51.59   11.90
  -2 -17  -2   67.89   12.30
  -2 -17  -2   71.69    8.50
   2 -17   2   69.79   11.00
   2  17   2   63.49   10.40
  -2  17  -2   68.89   10.70
  -2  17  -2   65.19    9.50
   2  17   2   62.29    8.40
   2  17   2   52.59    9.50
  -2  17  -2   58.69   10.20
   3 -17   2   18.30    8.10
  -3 -17  -2   21.90   10.60
   3 -17   2   16.20    8.10
   3 -17   2    3.50    7.50
   3 -17   2    8.90    9.30
   3  17   2    2.40    5.70
  -3  17  -2   -0.20    7.30
   3  17   2   11.70    7.90
  -3  17  -2    6.50    6.80
   3  17   2    5.10    6.20
   3  17   2   14.50    7.30
   4 -17   2  165.58   19.00
   4 -17   2  155.38   14.20
   4 -17   2  150.78   14.60
   4 -17   2  182.88   16.80
  -4 -17  -2  190.98   20.80
  -4  17  -2  141.09   14.10
  -4  17  -2  153.68   15.80
   4  17   2  159.58   12.60
   4  17   2  160.68   17.00
   4  17   2  162.58   12.10
   4  17   2  139.79   16.00
   5 -17   2    4.20    7.60
   5 -17   2    1.20    8.40
   5 -17   2   -7.50    9.30
   5 -17   2   -1.90    7.70
  -5 -17  -2    6.80   10.90
  -5  17  -2   -2.50    7.90
   5  17   2    9.40    7.30
  -5  17  -2   -2.30    8.60
   5  17   2    9.10    9.60
   5  17   2    0.50    6.90
   6 -17   2  192.68   17.10
   6 -17   2  204.28   20.20
  -6 -17  -2  237.78   26.80
   6 -17   2  169.68   21.70
  -6  17  -2  215.88   18.70
   6  17   2  211.18   20.50
  -6  17  -2  231.78   19.60
   7 -17   2  101.79   13.90
  -7 -17  -2  101.69   20.70
   7 -17   2  112.29   17.60
  -7  17  -2   66.19   14.50
  -7  17  -2   95.59   16.30
   7  17   2  136.79   18.60
   8 -17   2   -1.50   11.50
   8 -17   2    2.40   10.00
  -8 -17  -2   -8.20   14.50
   8 -17   2   18.30   13.30
  -8  17  -2    1.80   11.40
  -8  17  -2  -13.20   12.50
   8  17   2   -2.30   12.20
   9 -17   2   30.20   16.00
   9 -17   2   28.40   16.30
  -9 -17  -2   46.70   19.30
   9 -17   2   14.50   11.70
  -9  17  -2   29.80   16.40
   9  17   2   41.90   16.90
  -9  17  -2   34.00   15.80
   9 -18  -2   10.10   13.70
   9 -18  -2   11.40   11.20
  -9 -18   2   23.50   18.90
   9 -18  -2    2.80   13.00
   9  18  -2   19.40   13.50
  -9  18   2    9.70   12.90
  -9  18   2   14.60   13.40
   8 -18  -2  110.69   18.90
   8 -18  -2  115.39   14.70
  -8 -18   2  100.29   22.60
   8 -18  -2   93.29   18.90
   8  18  -2  111.29   17.10
  -8  18   2  112.39   19.60
  -8  18   2  105.99   18.20
   7 -18  -2   23.10   13.50
  -7 -18   2   19.90   15.00
   7 -18  -2   16.70    9.30
   7 -18  -2   17.50   11.50
  -7  18   2   19.80   11.30
  -7  18   2   23.60   10.70
   7  18  -2   29.80   11.80
   6 -18  -2  240.18   18.30
  -6 -18   2  300.97   29.90
   6 -18  -2  302.57   22.00
   6 -18  -2  210.38   23.10
   6 -18  -2  280.77   21.70
   6  18  -2  287.17   20.90
  -6  18   2  229.58   22.00
  -6  18   2  299.57   21.20
   5 -18  -2    3.70    9.80
   5 -18  -2   10.70    9.40
  -5 -18   2    8.00   11.70
  -5  18   2   -4.40    6.90
   5  18  -2   -6.20    7.00
  -5  18   2   12.70    7.70
   5  18  -2   -3.20    8.00
  -4 -18   2    5.80   10.20
   4 -18  -2   23.10    9.90
   4 -18  -2   16.80   10.50
  -4 -18   2   22.50    7.10
   4 -18  -2   12.10    8.10
  -4  18   2   12.00    5.90
  -4  18   2    4.90    7.20
   4  18  -2   22.10    8.50
  -4  18   2   22.50    9.10
   4  18  -2   15.90    8.40
  -3 -18   2   53.79    9.00
   3 -18  -2   61.09   11.90
  -3 -18   2   68.69   13.60
   3 -18  -2   63.09   10.80
   3 -18  -2   66.39   12.80
  -3  18   2   60.99    7.40
   3  18  -2   37.40    9.80
   3  18  -2   52.79   10.10
  -3  18   2   60.69   10.80
  -3  18   2   65.99   10.40
  -2 -18   2   19.00    9.70
   2 -18  -2    2.60    5.30
   2 -18  -2   -5.60    8.20
   2 -18  -2    5.60    7.10
  -2 -18   2    5.40    7.10
   2 -18  -2  -13.20    7.60
   2  18  -2   -2.80    6.40
  -2  18   2   -0.90    6.20
   2  18  -2    1.40    6.50
  -2  18   2   11.70    7.10
  -2  18   2    6.60    5.00
   1 -18  -2   10.60    7.10
   1 -18  -2    2.50    7.60
   1 -18  -2    2.40    7.80
   1 -18  -2   13.50    6.80
  -1 -18   2    3.90    7.40
  -1 -18   2   -4.80    6.60
  -1 -18   2    4.30    7.50
  -1  18   2   -1.80    5.60
   1  18  -2    8.90    6.10
   1  18  -2    1.30    6.20
   1  18  -2   -1.60    3.90
  -1  18   2    6.90    6.30
  -1  18   2   -2.40    5.90
   0 -18  -2 1124.99   36.80
   0 -18  -2 1058.19   35.10
   0 -18   2 1035.20   36.10
   0 -18  -2 1053.69   36.80
   0 -18   2  989.30   33.70
   0 -18  -2 1076.49   35.30
   0 -18   2 1085.59   35.80
   0  18   2 1038.50   34.20
   0  18   2 1046.70   32.80
   0  18  -2 1094.49   34.10
   0  18  -2 1076.69   34.50
   0  18  -2 1014.10   30.20
   0  18   2 1035.20   36.60
   0  18  -2 1016.70   35.70
   1 -18   2    8.40    5.80
  -1 -18  -2   18.60    8.20
  -1 -18  -2    7.40    8.50
  -1 -18  -2    7.00    9.20
  -1 -18  -2   12.20    6.80
   1 -18   2    9.00    8.80
  -1  18  -2    3.00    6.80
  -1  18  -2    3.50    5.80
   1  18   2   18.30    5.90
  -1  18  -2   21.30    7.60
  -1  18  -2   15.10    6.00
   1  18   2    0.80    6.40
   1  18   2    5.40    6.50
   2 -18   2  329.07   22.10
  -2 -18  -2  288.97   15.10
   2 -18   2  305.27   18.60
  -2 -18  -2  300.27   20.60
   2 -18   2  267.27   19.00
   2 -18   2  306.37   16.70
   2  18   2  288.77   17.80
   2  18   2  301.57   19.50
  -2  18  -2  303.17   17.70
   2  18   2  273.57   14.70
  -2  18  -2  301.37   16.90
   3 -18   2   26.10    8.70
   3 -18   2   20.20   11.20
   3 -18   2   52.69   10.10
  -3 -18  -2   34.10   12.60
   3 -18   2   32.60    9.10
   3  18   2   26.60    9.40
  -3  18  -2   53.29    9.50
  -3  18  -2   38.40    9.00
   3  18   2   45.70   10.20
   3  18   2   35.00    7.50
   4 -18   2   10.50   10.10
  -4 -18  -2   22.80   11.30
   4 -18   2   10.70    7.60
   4 -18   2    9.50    8.00
   4 -18   2    3.40    9.10
   4  18   2   -4.30    8.60
   4  18   2   15.40    6.80
  -4  18  -2    9.20    8.50
  -4  18  -2    6.60    7.60
   4  18   2   18.50   10.10
   4  18   2   14.20    6.70
   5 -18   2   -1.60    7.80
   5 -18   2    9.40   10.00
   5 -18   2    6.10    8.50
  -5 -18  -2  -11.80   10.10
   5 -18   2   -9.40   10.40
  -5  18  -2   -8.40    8.30
   5  18   2   -2.30    8.90
   5  18   2    6.30    6.80
   5  18   2   -5.40    7.10
  -5  18  -2    0.10    8.50
  -6 -18  -2   25.60   14.00
   6 -18   2   27.30    9.80
   6 -18   2   10.70   12.50
   6 -18   2   53.59   13.50
  -6  18  -2   18.00   11.20
   6  18   2   31.20   12.10
  -6  18  -2   26.10   10.60
  -7 -18  -2  114.29   22.20
   7 -18   2  102.09   16.90
   7 -18   2  104.29   14.80
  -7  18  -2   75.09   14.60
  -7  18  -2   94.59   16.00
   7  18   2  120.09   17.60
   8 -18   2   87.99   18.10
   8 -18   2   43.20   15.20
   8 -18   2   85.49   14.90
  -8 -18  -2   51.79   19.80
  -8  18  -2   86.39   16.20
   8  18   2   42.00   15.00
  -8  18  -2   43.00   15.50
  -9 -18  -2   32.70   19.60
   9 -18   2   12.00   12.70
   9 -18   2    4.60   14.30
   9 -18   2  -13.10   15.50
   9  18   2   -4.80   14.60
  -9  18  -2   11.40   14.30
  -9 -19   2   34.20   22.50
   9 -19  -2   50.29   16.80
   9 -19  -2   31.50   16.80
   9 -19  -2   21.00   11.30
  -9  19   2   47.40   15.60
   9  19  -2   45.00   15.70
  -9  19   2    8.50   14.40
   8 -19  -2    8.80   12.70
   8 -19  -2   20.20   14.30
  -8 -19   2   30.50   16.80
   8 -19  -2    7.60    9.70
  -8  19   2    8.50   11.80
  -8  19   2   16.10   12.20
   8  19  -2   10.60   13.30
   7 -19  -2   91.29   19.00
   7 -19  -2   84.59   16.20
   7 -19  -2   77.89   13.90
  -7 -19   2   92.89   21.30
   7  19  -2  112.59   17.60
  -7  19   2   94.99   15.50
  -7  19   2   99.99   16.80
   6 -19  -2  197.08   20.00
  -6 -19   2  211.38   25.00
   6 -19  -2  179.78   21.80
   6 -19  -2  182.38   19.50
   6  19  -2  207.78   20.00
  -6  19   2  180.08   18.80
  -6  19   2  120.69   15.70
  -5 -19   2    4.80   11.30
   5 -19  -2   23.60   12.10
   5 -19  -2   25.00    8.80
   5 -19  -2    6.10    9.40
  -5  19   2   15.70    9.60
   5  19  -2   21.20    9.80
  -5  19   2   28.60    9.30
   5  19  -2   14.30    9.60
   4 -19  -2  113.69   15.20
  -4 -19   2   79.89   16.30
   4 -19  -2   96.19   15.50
   4 -19  -2   83.79   12.40
   4  19  -2   92.19   13.70
  -4  19   2   93.29   13.30
   4  19  -2  112.79   14.20
  -4  19   2   90.99   13.70
  -3 -19   2   -3.10    9.80
   3 -19  -2    0.70    8.30
   3 -19  -2   -4.70    7.30
  -3 -19   2   -5.20    6.60
   3 -19  -2   16.90    8.80
   3  19  -2    1.20    7.20
  -3  19   2   11.20    5.10
  -3  19   2    0.90    6.80
  -3  19   2   11.30    7.50
   3  19  -2  -11.20    6.50
  -2 -19   2   11.30    9.80
   2 -19  -2    8.80    9.20
  -2 -19   2   -1.80    7.30
   2 -19  -2   13.00    6.10
   2 -19  -2    0.80    7.90
   2 -19  -2   10.60    7.80
   2  19  -2   12.50    7.40
  -2  19   2    9.20    5.20
   2  19  -2   10.20    7.60
  -2  19   2    4.20    6.70
  -2  19   2    5.60    6.90
   1 -19  -2  113.69   13.20
   1 -19  -2   78.19   12.80
  -1 -19   2   93.59   12.70
  -1 -19   2   74.89   11.10
  -1 -19   2   96.69   13.30
   1 -19  -2  101.99   11.50
   1 -19  -2  110.29   14.10
  -1  19   2  101.49   12.00
   1  19  -2  113.99   13.10
  -1  19   2  100.99   11.90
   1  19  -2  109.19   12.10
   1  19  -2  105.09    7.90
   0 -19   2   88.39   13.00
   0 -19   2   90.99   12.00
   0 -19  -2   86.29   12.40
   0 -19  -2   86.19   12.70
   0 -19  -2   67.79   11.50
   0 -19  -2   83.59   12.10
   0 -19   2  105.19   11.90
   0  19  -2  101.89   12.50
   0  19  -2   78.19   11.70
   0  19  -2   96.39    9.00
   0  19  -2   97.69   11.50
   0  19   2   72.29   10.40
   0  19   2   92.19   10.40
   0  19   2   70.59   11.70
  -1 -19  -2  139.99   13.30
  -1 -19  -2  140.09   14.30
   1 -19   2  122.69   11.00
  -1 -19  -2  136.09   15.40
  -1 -19  -2  126.89   15.30
   1 -19   2  139.79   16.50
   1 -19   2  141.49   14.40
  -1  19  -2  158.68   13.60
  -1  19  -2  139.69   12.10
  -1  19  -2  145.89   14.40
   1  19   2  131.99   13.60
   1  19   2  128.69   14.60
  -1  19  -2  143.39   13.20
   1  19   2  139.89   11.20
   2 -19   2   35.00   10.30
  -2 -19  -2   45.70    8.50
   2 -19   2   49.40   10.50
   2 -19   2   49.30   12.00
   2 -19   2   42.50    9.00
  -2 -19  -2   40.80   11.50
   2  19   2   30.60    7.10
  -2  19  -2   28.90    8.20
   2  19   2   38.90    9.20
  -2  19  -2   52.59    9.50
   2  19   2   42.00   10.50
   3 -19   2   53.29   10.80
   3 -19   2   63.19   14.30
   3 -19   2   49.99   10.60
  -3 -19  -2   65.89   13.90
   3 -19   2   72.29   11.20
  -3  19  -2   48.00    9.80
   3  19   2   28.70   10.90
  -3  19  -2   45.40    9.40
   3  19   2   70.09    9.50
   3  19   2   70.69   12.00
   4 -19   2  169.68   20.20
   4 -19   2  132.29   14.30
  -4 -19  -2  170.18   21.00
   4 -19   2  153.48   15.90
   4 -19   2  194.08   17.60
   4  19   2  189.28   13.50
   4  19   2  160.88   18.00
  -4  19  -2  157.28   16.30
   4  19   2  157.18   18.00
   4  19   2  173.98   13.00
  -4  19  -2  169.28   15.90
  -5 -19  -2  138.39   20.60
   5 -19   2  105.49   14.20
   5 -19   2   94.99   13.40
   5 -19   2  120.79   16.50
   5 -19   2  114.09   19.00
  -5  19  -2  113.59   15.40
  -5  19  -2  103.99   13.50
   5  19   2  127.19   17.00
   6 -19   2   67.59   15.30
  -6 -19  -2   61.59   15.80
   6 -19   2   41.30   14.60
   6 -19   2   69.99   12.50
   6  19   2   59.79   14.80
  -6  19  -2   49.30   13.60
  -6  19  -2   52.09   12.50
   7 -19   2   18.30   10.80
  -7 -19  -2   23.60   16.80
   7 -19   2    9.00   12.30
  -7  19  -2   11.60   11.40
  -7  19  -2    6.30   11.30
   7  19   2   16.20   12.70
  -8 -19  -2   10.60   15.70
   8 -19   2   18.80   11.30
   8 -19   2   -9.50   13.70
   8 -19   2   32.90   14.90
  -8  19  -2   24.10   14.10
   8  19   2   22.20   14.60
  -8  19  -2   25.60   13.20
   8 -20  -2  -13.40   12.20
  -8 -20   2   -7.50   14.90
   8 -20  -2  -21.50   10.90
   8  20  -2  -23.60   12.00
  -8  20   2   11.20   10.20
  -8  20   2    5.60   11.20
  -7 -20   2   51.09   18.10
   7 -20  -2   29.00   14.60
   7 -20  -2   84.49   15.40
  -7  20   2   47.10   12.90
   7  20  -2   68.69   15.10
  -7  20   2   83.79   15.90
  -6 -20   2  103.39   20.40
   6 -20  -2   87.99   17.10
   6 -20  -2   90.99   16.20
  -6  20   2   92.49   14.90
   6  20  -2  105.79   16.10
  -6  20   2   78.19   14.10
   5 -20  -2  160.28   18.30
  -5 -20   2  126.69   19.70
   5 -20  -2  122.69   15.00
   5 -20  -2  156.78   20.10
  -5  20   2  137.79   17.40
   5  20  -2  133.99   16.50
   5  20  -2  127.69   17.10
  -5  20   2  148.39   16.20
  -4 -20   2   12.80   10.60
   4 -20  -2   -1.70    7.90
   4 -20  -2    4.00    9.50
   4 -20  -2    1.60    9.50
  -4  20   2   -2.80    8.40
   4  20  -2  -13.90    6.70
   4  20  -2   -4.80    8.70
  -4  20   2   -8.80    7.10
  -3 -20   2   18.50   10.10
  -3 -20   2    1.90    7.80
   3 -20  -2   16.80    9.50
   3 -20  -2   -0.10    9.20
   3 -20  -2   16.10    8.60
   3  20  -2    3.10    7.80
  -3  20   2   21.20    8.80
  -3  20   2    4.90    5.90
  -3  20   2   11.70    7.40
   3  20  -2    4.90    8.20
   2 -20  -2  160.88   17.00
  -2 -20   2  159.48   15.10
   2 -20  -2  215.58   18.90
   2 -20  -2  204.18   18.10
  -2 -20   2  178.58   18.90
  -2  20   2  163.98   14.60
   2  20  -2  163.58   14.60
  -2  20   2  181.88   15.20
   2  20  -2  193.38   17.30
  -1 -20   2   25.00    9.70
   1 -20  -2   35.30   10.60
   1 -20  -2   30.30   10.40
   1 -20  -2   28.00    8.30
   1 -20  -2   26.10    9.70
  -1 -20   2   38.50   10.10
   1  20  -2   27.40    9.00
  -1  20   2   33.50    8.60
   1  20  -2   20.30    5.10
   1  20  -2   37.50    9.00
  -1  20   2   20.90    8.00
   0 -20   2  204.98   17.40
   0 -20  -2  187.18   17.40
   0 -20  -2  211.58   17.10
   0 -20  -2  185.18   16.80
   0 -20   2  188.48   14.50
   0 -20  -2  206.58   18.60
   0 -20   2  207.88   17.00
   0  20  -2  208.28   11.90
   0  20   2  205.38   15.40
   0  20   2  197.78   13.80
   0  20   2  203.48   17.80
   0  20  -2  206.78   17.50
   0  20  -2  212.58   15.70
   0  20  -2  198.38   14.70
   1 -20   2   -4.80    7.20
   1 -20   2    0.60    9.80
  -1 -20  -2   -4.60    8.40
  -1 -20  -2   16.00    8.50
  -1 -20  -2   -8.60    6.80
   1 -20   2   -6.30    5.40
  -1 -20  -2  -13.20    8.60
  -1  20  -2   13.40    7.00
   1  20   2    2.00    7.20
  -1  20  -2   -8.00    6.60
  -1  20  -2   -2.70    6.20
   1  20   2   -5.50    7.80
   1  20   2    8.80    5.90
   2 -20   2   85.19   11.00
   2 -20   2   61.89   13.50
  -2 -20  -2   67.69    9.50
   2 -20   2   91.69   13.10
  -2 -20  -2   61.29   13.30
   2 -20   2   63.49   11.30
  -2  20  -2   59.89   10.60
  -2  20  -2   90.09   11.50
  -2  20  -2   71.59   11.10
   2  20   2   66.59   11.20
   2  20   2   68.29    9.10
   2  20   2   56.89   12.20
   3 -20   2  261.17   18.10
   3 -20   2  262.97   18.80
  -3 -20  -2  283.07   22.90
   3 -20   2  265.27   22.20
   3 -20   2  275.57   19.90
   3  20   2  272.87   21.70
   3  20   2  290.27   20.20
   3  20   2  259.77   15.10
  -3  20  -2  282.57   17.60
  -3  20  -2  239.18   18.10
   4 -20   2  149.29   15.90
   4 -20   2  146.49   19.80
  -4 -20  -2  163.78   21.20
   4 -20   2  148.69   15.70
   4 -20   2  192.48   17.80
   4  20   2  187.98   19.50
  -4  20  -2  200.78   15.90
  -4  20  -2  145.19   16.00
   4  20   2  171.78   18.80
   5 -20   2   24.10   12.10
   5 -20   2   15.50   12.40
   5 -20   2   15.70   10.20
  -5 -20  -2    8.20   13.10
   5 -20   2   33.20   10.20
   5  20   2   26.60   12.30
  -5  20  -2   25.00   10.80
  -5  20  -2   14.90    8.80
  -6 -20  -2   42.30   18.00
   6 -20   2   72.09   13.40
   6 -20   2   82.99   16.50
   6 -20   2   60.69   16.40
  -6  20  -2   65.89   14.40
  -6  20  -2   77.99   13.70
   6  20   2   53.49   15.10
  -7 -20  -2  109.79   21.70
   7 -20   2   71.69   17.30
   7 -20   2   91.19   14.60
  -7  20  -2   81.99   17.00
  -7  20  -2   94.99   16.20
   7  20   2   75.99   18.00
  -8 -20  -2   75.69   23.00
   8 -20   2   76.99   19.50
   8 -20   2   77.39   14.80
   8 -20   2   67.29   18.20
   8  20   2   93.39   19.30
  -8  20  -2   57.89   17.10
   8 -21  -2    7.90   14.70
  -8 -21   2   -6.60   16.10
  -8  21   2   -6.40   11.70
   8  21  -2   -2.30   13.50
  -8  21   2   -8.00   10.90
   7 -21  -2  107.99   20.20
   7 -21  -2  103.39   17.20
  -7 -21   2  122.39   21.90
   7  21  -2  142.89   19.80
  -7  21   2  124.49   17.30
  -7  21   2  147.39   20.00
   6 -21  -2   14.70   13.50
  -6 -21   2  -21.20   13.40
   6 -21  -2   -0.60   11.50
   6 -21  -2   -2.20    8.90
  -6  21   2   -9.80    8.00
   6  21  -2    3.00   11.20
  -6  21   2   -2.20    9.70
   5 -21  -2   78.19   16.50
   5 -21  -2   50.99   12.40
   5 -21  -2   86.79   15.00
  -5 -21   2   80.69   18.70
  -5  21   2   48.70   12.60
  -5  21   2   54.59   12.50
   5  21  -2   58.69   13.70
   5  21  -2  100.39   16.10
  -4 -21   2   -5.00    9.90
   4 -21  -2    8.70    9.40
   4 -21  -2    4.60    9.90
   4 -21  -2    6.90   10.40
   4  21  -2   -0.10    8.80
  -4  21   2   26.50    9.30
  -4  21   2   -7.50    7.20
   4  21  -2    9.20    8.40
  -3 -21   2   18.30   11.40
   3 -21  -2   18.40   10.20
   3 -21  -2   11.50   11.10
  -3 -21   2   18.20    8.40
   3 -21  -2   12.50    9.40
   3  21  -2   13.50    8.70
   3  21  -2   25.50    9.80
  -3  21   2   22.70    9.20
  -3  21   2   15.70    8.40
   2 -21  -2   19.00    9.80
  -2 -21   2   -5.70    9.20
  -2 -21   2   -0.60    8.00
   2 -21  -2    6.60    8.80
   2 -21  -2   -6.20    8.60
   2  21  -2    4.20    8.00
  -2  21   2   -2.60    7.00
  -2  21   2    6.00    7.90
   2  21  -2   11.90    8.20
   1 -21  -2  134.19   16.30
   1 -21  -2  141.89   16.40
   1 -21  -2  158.78   14.00
  -1 -21   2  169.38   17.30
  -1 -21   2  172.38   16.20
   1 -21  -2  177.88   17.30
   1  21  -2  143.09   16.00
   1  21  -2  129.89   13.60
  -1  21   2  159.08   13.60
  -1  21   2  157.28   14.10
   0 -21  -2  357.36   21.30
   0 -21  -2  362.76   23.30
   0 -21   2  347.17   21.70
   0 -21  -2  376.06   21.70
   0 -21   2  343.67   22.80
   0 -21  -2  354.56   22.10
   0 -21   2  368.86   19.90
   0  21   2  371.96   18.20
   0  21  -2  374.26   22.30
   0  21  -2  321.57   19.50
   0  21   2  382.96   20.60
   0  21  -2  365.66   19.60
   0  21  -2  345.97   15.80
  -1 -21  -2  426.46   25.10
  -1 -21  -2  468.45   24.70
   1 -21   2  461.65   26.50
  -1 -21  -2  426.96   21.80
   1 -21   2  449.16   24.60
   1  21   2  428.96   19.40
   1  21   2  446.96   25.60
  -1  21  -2  391.86   20.40
  -1  21  -2  415.36   19.40
   1  21   2  450.05   23.30
  -1  21  -2  473.15   22.40
   2 -21   2   46.20   13.50
   2 -21   2   58.99   11.40
  -2 -21  -2   37.20   13.50
  -2  21  -2   53.39   10.10
  -2  21  -2   31.60    9.10
   2  21   2   61.59   11.30
  -2  21  -2   50.99   10.30
   2  21   2   61.59   13.20
   2  21   2   66.99    9.10
   3 -21   2  194.68   17.70
   3 -21   2  263.37   18.20
   3 -21   2  227.68   23.10
   3 -21   2  219.58   19.10
  -3 -21  -2  236.18   21.30
   3  21   2  191.58   14.30
   3  21   2  206.68   18.50
  -3  21  -2  204.98   16.90
  -3  21  -2  212.58   16.60
   3  21   2  202.78   20.40
   4 -21   2  164.98   17.30
  -4 -21  -2  144.39   21.40
   4 -21   2  155.18   20.80
   4 -21   2  174.88   17.40
   4 -21   2  172.28   17.10
  -4  21  -2  164.38   16.60
   4  21   2  130.59   17.60
  -4  21  -2  165.68   15.90
   4  21   2  197.28   20.80
   5 -21   2   13.50    9.30
   5 -21   2   16.70   11.80
   5 -21   2    2.90   11.90
   5 -21   2    7.40    9.90
  -5 -21  -2   12.20   13.50
   5  21   2   19.50   11.30
  -5  21  -2   17.10   10.60
   5  21   2   30.10   12.90
  -5  21  -2   26.40   10.90
  -6 -21  -2   29.60   15.50
   6 -21   2   30.70   12.50
   6 -21   2   19.60   13.60
   6 -21   2   17.20   14.10
  -6  21  -2   48.90   11.60
  -6  21  -2   23.60   11.60
   6  21   2   50.19   15.60
   7 -21   2   69.49   14.70
   7 -21   2   48.70   16.00
   7 -21   2   55.39   16.70
  -7 -21  -2   56.79   20.70
  -7  21  -2   73.69   14.60
   7  21   2   92.89   19.00
  -7  21  -2   74.09   16.90
   8 -21   2    6.70   15.00
  -8 -21  -2    0.80   17.60
   8 -21   2   -0.10   14.50
   8 -21   2   -9.10   11.70
  -8  21  -2    3.40   14.00
   8  21   2   24.90   16.50
   8 -22  -2   40.20   18.40
  -8 -22   2   51.09   21.10
   8 -22  -2   62.89   14.80
   8  22  -2   52.59   16.40
  -8  22   2   27.60   14.00
  -8  22   2   70.49   15.90
   7 -22  -2    1.20   10.00
  -7 -22   2   41.00   19.40
   7 -22  -2   56.99   14.80
   7 -22  -2    6.80   14.30
  -7  22   2   28.40   11.50
   7  22  -2   26.30   14.90
  -7  22   2   53.39   14.90
  -6 -22   2   14.80   13.60
   6 -22  -2   28.20   14.70
   6 -22  -2   -6.30   11.70
   6 -22  -2    7.50   10.40
  -6  22   2    8.40   10.50
  -6  22   2   23.50   12.70
   6  22  -2   10.40   12.60
   5 -22  -2   17.80   11.00
  -5 -22   2   25.00   15.40
   5 -22  -2   33.50   14.80
   5 -22  -2   25.60   12.00
   5  22  -2   49.99   13.50
  -5  22   2   27.00   11.50
   5  22  -2   20.10   11.10
  -5  22   2   29.20   11.80
   4 -22  -2    4.10   11.10
   4 -22  -2   20.10   11.10
  -4 -22   2   -0.80   12.00
   4 -22  -2   27.40   10.70
  -4  22   2   17.40    9.00
  -4  22   2   31.90   10.80
   4  22  -2   30.50   11.50
   4  22  -2   23.00   10.40
   3 -22  -2  112.99   15.00
  -3 -22   2  109.39   13.70
   3 -22  -2   77.19   15.80
   3 -22  -2   85.89   14.80
  -3 -22   2  134.19   19.20
   3  22  -2  105.89   15.20
   3  22  -2  101.09   13.90
  -3  22   2   98.39   14.50
  -3  22   2  100.09   13.40
  -2 -22   2   51.69   13.80
  -2 -22   2   60.89   12.00
   2 -22  -2   38.00   11.50
   2 -22  -2   44.70   12.10
   2 -22  -2   34.30   12.00
  -2  22   2   63.29   11.40
  -2  22   2   72.59   12.50
   2  22  -2   74.99   13.60
   2  22  -2   83.09   12.40
   1 -22  -2    2.90    8.60
  -1 -22   2   -6.90    8.20
  -1 -22   2    9.90   10.10
   1 -22  -2    2.90    9.40
   1 -22  -2   15.00    9.90
   1 -22  -2   -3.50    8.40
  -1  22   2   -2.10    6.40
   1  22  -2    7.10    8.50
  -1  22   2    6.80    7.60
   1  22  -2    6.60    7.50
   0 -22   2   21.80   11.10
   0 -22   2   24.90    9.70
   0 -22  -2   -4.20    8.30
   0 -22  -2    6.70    9.10
   0 -22  -2   15.10    9.70
   0 -22  -2   20.20    9.70
   0  22   2   18.60    8.60
   0  22   2   10.00    7.60
   0  22  -2   11.50    6.20
   0  22  -2   18.80    8.80
   0  22  -2    5.90    7.40
   0  22  -2   14.00    8.30
  -1 -22  -2   26.40   10.90
  -1 -22  -2   52.39   12.30
   1 -22   2   25.70   10.60
   1 -22   2   48.60   12.80
  -1 -22  -2   20.50    9.60
  -1  22  -2   33.20    9.70
   1  22   2   21.40   10.30
  -1  22  -2   22.00    8.40
   1  22   2   30.20    8.50
   1  22   2   22.00    9.40
  -1  22  -2   35.70    7.80
   2 -22   2   -0.10   11.40
   2 -22   2   12.60    9.20
   2 -22   2   25.50    9.60
  -2 -22  -2    7.50   11.30
  -2 -22  -2    2.80    9.90
   2  22   2   -1.10    9.20
   2  22   2    7.00    5.70
  -2  22  -2    2.50    7.60
   2  22   2   19.80    9.50
  -2  22  -2   10.50    7.40
  -2  22  -2   10.30    8.30
   3 -22   2  152.98   16.50
   3 -22   2  199.48   21.60
  -3 -22  -2  147.59   20.70
   3 -22   2  209.68   17.70
   3 -22   2  183.88   18.50
  -3  22  -2  156.38   16.50
   3  22   2  158.28   17.50
  -3  22  -2  180.98   15.50
   3  22   2  184.58   20.30
  -3  22  -2  204.18   16.80
   4 -22   2   51.39   13.10
   4 -22   2   28.10   11.00
   4 -22   2   43.90   14.20
   4 -22   2   60.59   13.50
  -4 -22  -2   51.69   15.40
   4  22   2   42.50   13.90
  -4  22  -2   46.60   11.10
  -4  22  -2   32.00   11.30
   4  22   2   12.90   10.90
  -5 -22  -2  -10.00   12.10
   5 -22   2    6.70   12.80
   5 -22   2   -1.20    9.70
   5 -22   2    7.80   10.50
   5 -22   2   -2.70   11.00
  -5  22  -2    3.80    8.90
   5  22   2    6.00   10.50
  -5  22  -2   13.20    9.70
   5  22   2   -0.60   12.00
   6 -22   2    6.80   12.20
   6 -22   2    0.70   10.90
  -6 -22  -2   23.90   15.10
   6 -22   2   31.00   15.10
  -6  22  -2    7.60   10.80
   6  22   2    1.40   14.00
  -6  22  -2   -1.10   10.80
   7 -22   2   11.00   13.00
   7 -22   2   19.70   13.30
   7 -22   2    7.20   15.30
  -7 -22  -2   36.50   18.50
   7  22   2   31.10   16.10
  -7  22  -2   11.80   12.50
  -8 -22  -2   22.40   18.90
   8 -22   2   20.90   16.70
   8 -22   2    2.50   13.20
   8 -22   2    1.10   14.00
  -8  22  -2    1.30   13.80
   8  22   2   12.30   16.70
   7 -23  -2   -3.90   10.70
   7 -23  -2    7.90   12.60
   7 -23  -2    1.20   15.20
  -7 -23   2   -3.30   17.00
   7  23  -2   -8.10   14.10
  -7  23   2   -6.70   11.90
  -7  23   2    2.00   10.60
  -6 -23   2   12.40   16.30
   6 -23  -2   -6.70   10.70
   6 -23  -2   17.10   13.90
   6 -23  -2   27.40   15.50
  -6  23   2  -18.40   10.60
  -6  23   2    1.50   11.20
   6  23  -2   14.10   12.70
   5 -23  -2   39.30   12.80
  -5 -23   2   56.39   17.10
   5 -23  -2   53.89   14.60
   5 -23  -2   37.50   15.20
   5  23  -2   60.59   15.60
  -5  23   2   49.70   12.60
  -5  23   2   43.00   12.20
   5  23  -2   49.10   13.70
   4 -23  -2  391.36   28.50
  -4 -23   2  406.26   29.40
   4 -23  -2  427.66   26.30
   4 -23  -2  373.36   27.70
  -4  23   2  370.16   23.10
  -4  23   2  354.56   24.00
   4  23  -2  347.17   23.70
   4  23  -2  407.36   27.10
   3 -23  -2   -2.10   10.20
  -3 -23   2   29.80   13.00
   3 -23  -2  -10.60    9.50
   3 -23  -2   26.60   12.10
   3  23  -2    8.90    9.50
  -3  23   2    2.60    7.90
   3  23  -2   10.30    9.90
  -3  23   2    0.60    8.90
  -2 -23   2  318.27   21.60
  -2 -23   2  369.06   23.80
   2 -23  -2  297.57   23.40
   2 -23  -2  328.57   25.10
   2 -23  -2  327.17   22.60
   2  23  -2  325.17   23.40
  -2  23   2  298.07   19.20
   2  23  -2  327.77   20.40
  -2  23   2  310.07   20.00
   1 -23  -2   24.60   10.10
   1 -23  -2   -9.50    9.90
  -1 -23   2   -3.10    9.60
  -1 -23   2    2.00    9.70
   1 -23  -2   -1.70    9.50
   1  23  -2    8.00    9.20
  -1  23   2   -9.30    7.50
   1  23  -2    3.90    7.20
  -1  23   2   10.60    7.40
   0 -23  -2   21.50   10.70
   0 -23   2   26.40    9.90
   0 -23  -2   25.70   10.50
   0 -23  -2   39.30   12.20
   0 -23  -2   39.40   11.50
   0 -23   2   29.60   11.80
   0  23   2   15.90    8.80
   0  23   2   33.00    9.00
   0  23  -2   44.90   10.00
  -1 -23  -2   71.79   14.30
  -1 -23  -2  101.59   13.50
   1 -23   2   71.19   15.50
  -1 -23  -2   74.69   13.90
   1 -23   2   67.79   13.30
   1  23   2   75.09   10.50
  -1  23  -2   57.79   10.90
   1  23   2   87.59   13.70
  -1  23  -2   62.29   11.80
  -1  23  -2   64.69   10.20
  -2 -23  -2   19.30   12.20
   2 -23   2   14.90   11.90
   2 -23   2   12.00   10.80
   2 -23   2    2.70    9.30
  -2 -23  -2   12.90   12.50
   2  23   2   40.70    8.70
   2  23   2   14.20    9.10
  -2  23  -2   16.70    9.00
   2  23   2    1.80   10.60
  -2  23  -2   28.60    9.30
  -2  23  -2   25.30    9.20
   3 -23   2   95.39   14.70
  -3 -23  -2   79.89   17.70
   3 -23   2  111.59   18.60
   3  23   2  100.59   16.40
   3  23   2   80.69   14.20
  -3  23  -2   94.39   13.90
  -3  23  -2   96.29   13.50
  -3  23  -2  102.99   13.40
   4 -23   2  213.28   19.90
   4 -23   2  218.88   20.40
  -4 -23  -2  196.08   24.40
   4 -23   2  172.78   18.50
   4 -23   2  188.08   24.30
  -4  23  -2  161.28   16.30
   4  23   2  228.28   23.10
  -4  23  -2  192.18   18.90
   4  23   2  202.08   21.60
  -4  23  -2  186.18   19.70
   5 -23   2    9.40   12.40
   5 -23   2   16.30   15.10
   5 -23   2   12.50   10.60
  -5 -23  -2    4.90   14.20
   5 -23   2   49.20   14.50
   5  23   2   19.10   13.70
  -5  23  -2   27.00   10.50
  -5  23  -2   15.50   10.40
   5  23   2   19.50   11.90
   6 -23   2   54.69   15.90
  -6 -23  -2   47.60   18.10
   6 -23   2   55.19   14.00
   6 -23   2   52.49   17.60
  -6  23  -2   27.20   12.60
   6  23   2   41.10   17.20
  -6  23  -2   33.10   13.70
   7 -23   2   51.19   18.10
   7 -23   2  131.99   18.00
  -7 -23  -2   70.09   21.10
   7 -23   2   34.60   18.10
  -7  23  -2   60.89   15.70
   7  23   2  112.29   21.60
   7 -24  -2   18.10   18.20
   7 -24  -2   18.40   13.40
   7 -24  -2   48.80   15.90
  -7 -24   2    3.10   18.10
  -7  24   2    1.80   12.80
   7  24  -2  -22.10   14.80
  -7  24   2  -12.10   12.00
   6 -24  -2    8.30   14.70
  -6 -24   2    6.60   16.60
   6 -24  -2    1.90   11.40
   6 -24  -2   -8.60   12.50
   6  24  -2    2.10   12.90
  -6  24   2    8.60   10.80
  -6  24   2    7.20   11.70
   5 -24  -2    1.40   13.30
   5 -24  -2   23.30   11.90
  -5 -24   2   -6.80   14.80
   5 -24  -2   24.60   12.70
   5  24  -2   -3.90   10.20
  -5  24   2    8.00   11.30
   5  24  -2   -4.10   12.40
  -5  24   2    5.40    9.90
   4 -24  -2    9.50   10.50
  -4 -24   2    5.30   13.80
   4 -24  -2    8.10   12.80
   4 -24  -2   -0.20   12.30
   4  24  -2   13.10   11.30
   4  24  -2    5.10    9.90
  -4  24   2    4.90    9.20
  -4  24   2    5.50   10.50
   3 -24  -2  -11.90    9.80
   3 -24  -2   -2.80   11.10
   3 -24  -2   -1.20   10.50
  -3 -24   2  -11.40   11.10
   3  24  -2   -0.60    9.60
  -3  24   2   11.00    9.70
  -3  24   2    3.00    8.30
   3  24  -2  -13.50    8.20
  -2 -24   2  306.67   24.10
   2 -24  -2  342.47   24.10
  -2 -24   2  313.77   21.60
   2 -24  -2  295.07   24.10
   2 -24  -2  320.67   24.70
   2  24  -2  325.97   24.30
  -2  24   2  314.17   20.90
  -2  24   2  338.57   20.60
   2  24  -2  318.17   20.80
   1 -24  -2   81.19   15.40
  -1 -24   2   87.79   14.90
   1 -24  -2   60.69   13.00
  -1 -24   2   95.79   15.20
   1 -24  -2   95.89   15.60
  -1  24   2   76.09   12.50
   1  24  -2   80.79   13.90
  -1  24   2   64.89   11.30
   1  24  -2   54.09   11.00
   0 -24  -2   62.99   14.10
   0 -24  -2   70.49   13.40
   0 -24   2   87.19   16.10
   0 -24  -2   51.29   12.30
   0  24   2   78.79   11.00
   0  24   2   70.29   12.40
   0  24  -2   48.60   10.30
  -1 -24  -2   32.60   12.90
   1 -24   2   44.40   13.40
  -1 -24  -2   42.20   12.20
   1 -24   2   58.29   14.70
  -1 -24  -2   28.20   10.70
   1 -24   2   44.10   12.70
  -1  24  -2   24.30    9.50
  -1  24  -2   24.10    9.70
   1  24   2   44.40   11.70
  -1  24  -2   41.50    9.30
   1  24   2   27.20    7.80
   2 -24   2   62.89   15.50
  -2 -24  -2   34.30   13.20
  -2 -24  -2   61.79   15.30
   2 -24   2   20.80   11.10
   2 -24   2   50.49   13.90
  -2  24  -2   50.99   10.70
  -2  24  -2   27.70   10.00
   2  24   2   49.70   11.50
   2  24   2   34.40   12.80
  -2  24  -2   70.09   11.60
   3 -24   2   17.30   10.40
   3 -24   2   19.70   11.10
  -3 -24  -2    2.50   11.80
  -3 -24  -2    1.90   13.50
   3 -24   2   27.70   14.90
   3  24   2   23.60   11.30
  -3  24  -2    0.40    9.10
  -3  24  -2   -0.40    8.30
  -3  24  -2    4.90    8.20
   3  24   2    5.90   10.70
  -4 -24  -2    3.90   13.60
   4 -24   2    1.60   10.70
   4 -24   2  -10.40   12.30
   4 -24   2   -3.10   10.40
   4  24   2    3.60   11.20
   4  24   2    1.40   12.00
  -4  24  -2   12.40    9.50
  -4  24  -2    8.90    9.50
  -4  24  -2    8.20    9.50
   5 -24   2   43.40   13.80
   5 -24   2   76.49   15.50
   5 -24   2   36.50   12.40
  -5 -24  -2   50.39   17.00
   5 -24   2   28.80   17.00
   5  24   2   38.90   16.40
  -5  24  -2   44.50   11.70
  -5  24  -2   25.00   14.00
   5  24   2   26.90   14.00
   6 -24   2  -15.40   13.50
  -6 -24  -2   10.20   18.00
   6 -24   2  -17.20   12.50
   6  24   2   -0.60   15.60
  -6  24  -2   10.70   11.70
  -7 -24  -2   19.80   19.20
   7 -24   2  -21.40   15.50
   7 -24   2    3.50   16.80
   7 -24   2   11.30   14.20
   7  24   2   10.50   17.20
  -7  24  -2   -7.50   13.20
   7 -25  -2   24.60   19.20
  -7 -25   2   29.30   22.80
   7 -25  -2   92.79   18.90
   7 -25  -2   57.59   16.80
   7  25  -2   14.60   16.20
  -7  25   2   49.90   16.60
  -7  25   2   32.70   14.80
   6 -25  -2   12.70   14.10
   6 -25  -2   -1.30   12.20
  -6 -25   2   -1.50   16.60
   6 -25  -2    2.90   16.10
  -6  25   2   12.60   11.50
   6  25  -2    4.80   15.40
  -6  25   2   10.70   12.90
   5 -25  -2   32.00   14.80
   5 -25  -2   30.90   17.00
   5 -25  -2   59.49   14.50
  -5 -25   2   61.39   20.60
  -5  25   2   48.70   14.90
   5  25  -2   63.59   17.20
   5  25  -2   37.30   14.50
  -5  25   2   26.60   11.90
   4 -25  -2  135.19   18.90
   4 -25  -2   95.09   19.00
  -4 -25   2  112.79   20.40
   4 -25  -2  149.29   22.10
   4  25  -2  140.09   20.30
   4  25  -2  127.79   17.30
  -4  25   2  133.99   17.00
  -4  25   2   93.19   15.40
   3 -25  -2   45.20   14.70
   3 -25  -2   64.19   15.70
  -3 -25   2   53.89   17.60
   3 -25  -2   21.40   12.90
   3  25  -2   28.20   12.00
  -3  25   2   29.00   10.70
   3  25  -2   48.40   13.50
  -3  25   2   47.20   12.70
   2 -25  -2  115.79   17.20
  -2 -25   2  120.79   16.60
   2 -25  -2  123.09   18.40
  -2 -25   2  155.88   20.70
   2 -25  -2  127.89   18.40
   2  25  -2  158.98   18.70
  -2  25   2  134.69   15.60
   2  25  -2  157.18   16.90
  -2  25   2  123.09   15.50
   1 -25  -2   53.49   12.80
  -1 -25   2   45.80   12.60
   1 -25  -2   49.20   13.50
  -1 -25   2   75.49   15.50
   1 -25  -2   48.60   13.10
   1  25  -2   58.29   11.40
  -1  25   2   46.60   11.00
  -1  25   2   57.79   11.60
   0 -25  -2   -5.70    9.90
   0 -25  -2   22.40   11.70
   0 -25   2   -0.70   11.60
   0  25  -2   16.80    8.90
   0  25   2   11.40    8.20
   0  25   2    8.10    8.70
  -1 -25  -2    5.90   11.80
   1 -25   2    4.60   10.80
  -1 -25  -2    5.10   10.80
   1 -25   2   -7.20    9.60
   1  25   2    5.80    8.70
   1  25   2    8.70    6.80
  -1  25  -2    3.80    8.70
  -1  25  -2   -2.60    7.50
  -2 -25  -2   12.40   12.00
   2 -25   2    6.80   12.80
   2 -25   2  -14.80   10.00
   2 -25   2    2.90   10.90
  -2 -25  -2   19.00   12.70
  -2  25  -2   -4.10    8.40
   2  25   2    6.00   10.00
  -2  25  -2  -12.40    8.30
  -2  25  -2   -5.70    8.30
   3 -25   2   -8.00   10.20
  -3 -25  -2  -11.90   11.10
  -3 -25  -2   -0.90   13.40
   3 -25   2  -17.90   10.50
   3 -25   2  -10.90   12.80
   3  25   2    8.60   10.80
  -3  25  -2   -7.90    8.60
   3  25   2   -3.90   11.50
  -3  25  -2   15.50    8.40
  -3  25  -2   -1.00    9.40
   4 -25   2   71.89   15.40
   4 -25   2  110.69   19.90
  -4 -25  -2   61.29   20.30
  -4  25  -2   83.29   14.60
  -4  25  -2   52.29   13.30
   4  25   2   45.80   14.60
  -4  25  -2  110.59   16.50
   4  25   2   76.79   18.10
   5 -25   2    0.80   11.90
   5 -25   2  -29.80   12.20
   5 -25   2   -3.30   12.50
  -5 -25  -2   -1.90   14.80
   5 -25   2   10.70   15.00
   5  25   2    5.70   14.70
  -5  25  -2    1.80   10.70
   5  25   2  -16.20   10.10
  -5  25  -2   -3.70   10.50
   6 -25   2   50.09   16.20
   6 -25   2   61.19   17.40
  -6 -25  -2   46.00   20.30
   6  25   2   64.59   19.70
  -6  25  -2   51.79   16.20
  -6  25  -2   62.59   16.90
   6 -26  -2  -14.80   11.90
   6 -26  -2  -41.80   14.10
   6 -26  -2   -8.00   14.40
  -6 -26   2   -3.20   18.40
  -6  26   2    0.00   12.70
  -6  26   2    5.30   12.40
   6  26  -2  -19.60   15.90
   5 -26  -2   39.60   14.90
  -5 -26   2    9.90   18.70
   5 -26  -2   13.60   15.10
   5 -26  -2   38.20   14.70
   5  26  -2   12.80   14.60
  -5  26   2   25.20   12.70
   5  26  -2   45.70   15.20
  -5  26   2   32.30   14.10
  -4 -26   2   -5.00   15.20
   4 -26  -2    5.30   12.90
   4 -26  -2   -6.20   14.00
   4 -26  -2  -13.00   12.50
   4  26  -2  -16.10    9.50
  -4  26   2    2.20   10.60
  -4  26   2   17.50   11.20
   4  26  -2   25.10   14.10
  -3 -26   2  236.98   27.20
   3 -26  -2  287.07   27.20
   3 -26  -2  188.58   20.70
   3 -26  -2  205.98   23.10
   3  26  -2  201.18   20.70
  -3  26   2  253.17   20.40
   3  26  -2  254.57   25.40
  -3  26   2  247.88   20.70
   2 -26  -2   59.29   14.70
   2 -26  -2   51.69   15.60
   2 -26  -2   61.49   17.00
  -2 -26   2   61.29   16.00
   2  26  -2   77.69   13.10
  -2  26   2   44.30   11.90
   2  26  -2   29.70   12.90
  -2  26   2   51.29   12.10
   1 -26  -2  103.59   16.50
   1 -26  -2   92.89   16.20
  -1 -26   2  125.49   17.50
  -1  26   2  108.99   14.40
  -1  26   2   92.69   14.10
   1  26  -2  131.09   16.30
   0 -26  -2   63.29   15.50
   0 -26   2   45.50   14.10
   0 -26  -2   61.09   14.50
   0  26   2   40.90   10.20
   0  26  -2   50.09   11.50
   0  26   2   41.80   11.50
  -1 -26  -2   -3.30   10.80
  -1 -26  -2  -14.90   12.80
   1 -26   2    3.60   11.40
   1 -26   2   11.70   10.80
  -1  26  -2    2.40    8.60
   1  26   2  -13.70    8.50
  -1  26  -2   -8.30    8.60
   2 -26   2    0.20   10.90
   2 -26   2   17.90   14.80
  -2 -26  -2   14.40   13.20
  -2 -26  -2   18.10   12.50
  -2  26  -2   16.30   10.70
   2  26   2   26.20   12.10
  -2  26  -2   -2.30    9.20
  -2  26  -2    1.30    8.50
  -3 -26  -2  212.88   26.40
   3 -26   2  219.68   26.90
   3 -26   2  236.88   22.90
   3 -26   2  211.68   21.60
  -3 -26  -2  212.38   23.70
  -3  26  -2  185.48   19.30
  -3  26  -2  246.68   18.20
  -3  26  -2  209.98   19.50
   3  26   2  215.48   22.50
   3  26   2  202.58   23.80
  -4 -26  -2    7.60   13.20
   4 -26   2  -11.50   11.00
   4 -26   2  -13.80   13.00
   4 -26   2    3.30   12.20
  -4 -26  -2    2.10   16.20
   4  26   2   -1.60   11.60
  -4  26  -2    4.80   10.00
  -4  26  -2   -7.80   10.40
   4  26   2   -3.30   13.90
  -4  26  -2    2.20    9.10
   5 -26   2   85.69   21.80
   5 -26   2   68.29   16.30
  -5 -26  -2   20.00   20.00
  -5  26  -2   57.79   13.70
   5  26   2   46.20   15.80
   5  26   2   31.90   17.40
  -5  26  -2   76.49   15.80
   6 -26   2  -13.20   14.20
  -6 -26  -2  -38.90   16.10
  -6  26  -2  -20.80   12.20
   6  26   2   45.80   18.90
  -6  26  -2   25.40   12.80
   6 -27  -2   11.50   14.90
   6 -27  -2   -3.60   17.00
  -6 -27   2   57.59   21.20
   6 -27  -2  -10.50   17.20
   6  27  -2  -10.70   16.20
  -6  27   2   -1.20   11.70
  -6  27   2  -19.20   12.30
   5 -27  -2  -11.40   16.30
  -5 -27   2   -0.80   17.40
   5 -27  -2   -4.60   13.20
   5 -27  -2   30.70   15.50
   5  27  -2   -5.80   16.00
   5  27  -2   -1.50   12.90
  -5  27   2   -3.00   10.80
  -5  27   2   18.00   13.80
  -4 -27   2    3.30   15.90
   4 -27  -2  -33.90   12.80
   4 -27  -2    6.20   13.60
   4 -27  -2  -13.70   14.70
  -4  27   2  -15.20    9.90
   4  27  -2    3.20   13.20
   4  27  -2    7.80   10.90
  -4  27   2   -0.90   10.50
   3 -27  -2   62.39   15.20
  -3 -27   2   41.60   16.70
   3 -27  -2   39.80   14.30
   3 -27  -2   56.39   17.20
   3  27  -2   51.59   14.00
   3  27  -2   64.89   15.90
  -3  27   2   63.89   13.70
  -3  27   2   51.29   13.30
   2 -27  -2    0.50   12.80
   2 -27  -2    0.30   11.60
   2 -27  -2   -3.80   13.20
  -2 -27   2   -8.50   14.70
   2  27  -2    5.60   10.30
  -2  27   2    7.80   10.40
  -2  27   2   31.60   10.90
   1 -27  -2  221.68   22.80
  -1 -27   2  264.37   22.90
   1 -27  -2  183.38   21.70
  -1  27   2  202.38   20.20
   1  27  -2  228.38   19.80
  -1  27   2  193.28   18.00
   0 -27   2    2.50   12.20
   0 -27   2   -0.60   12.50
   0 -27  -2   -2.60   12.00
   0 -27  -2   -2.00   11.40
   0  27   2    1.30    9.10
   0  27   2  -19.40    8.60
   0  27  -2   -7.90    8.60
  -1 -27  -2   -9.40   11.00
   1 -27   2   10.50   13.80
   1 -27   2    9.40   10.90
  -1  27  -2    1.90    9.00
   1  27   2   -4.70    9.50
  -2 -27  -2   46.60   15.10
   2 -27   2   17.10   16.10
   2 -27   2   30.10   13.60
  -2 -27  -2   53.79   16.90
  -2  27  -2   25.10   11.00
   2  27   2   34.60   12.80
  -2  27  -2   29.10   12.20
  -3 -27  -2    4.80   15.50
   3 -27   2   38.60   13.20
  -3 -27  -2   25.80   13.50
   3 -27   2   51.79   18.50
   3 -27   2    5.80   14.30
   3  27   2   35.60   13.70
  -3  27  -2   37.60   12.60
  -3  27  -2   32.90   12.50
  -3  27  -2   36.30   11.80
   4 -27   2   11.80   15.80
[truncated: 1,678,199 more chars]
