# Supplementary material for: Catalytic dehydrogenative decarboxyolefination of carboxylic acids
Source: Springer Nature journal article supplement (doi:10.1038/s41557-018-0142-4), 2018-09-27
Supplement: 41557_2018_142_MOESM4_ESM.mol [file 41557_2018_142_MOESM4_ESM.mol]

nchem.18040709B-comp1.mol
  ChemDraw08201813352D

 28 30  0  0  1  0  0  0  0  0999 V2000
   -0.0286    1.3565    0.0000 Co  0  2  0  0  0  0  0  0  0  0  0  0
   -1.3734    1.7118    0.0000 N   0  0  0  0  0  0  0  0  0  0  0  0
   -1.3734    0.8867    0.0000 N   0  0  0  0  0  0  0  0  0  0  0  0
    1.3734    1.7977    0.0000 N   0  0  0  0  0  0  0  0  0  0  0  0
    1.3734    0.9726    0.0000 N   0  0  0  0  0  0  0  0  0  0  0  0
   -2.1704    1.4982    0.0000 C   0  0  0  0  0  0  0  0  0  0  0  0
   -2.1704    1.1002    0.0000 C   0  0  0  0  0  0  0  0  0  0  0  0
    2.1704    1.5841    0.0000 C   0  0  0  0  0  0  0  0  0  0  0  0
    2.1704    1.1861    0.0000 C   0  0  0  0  0  0  0  0  0  0  0  0
   -1.3522    0.2736    0.0000 O   0  0  0  0  0  0  0  0  0  0  0  0
   -1.4095    2.3649    0.0000 O   0  5  0  0  0  0  0  0  0  0  0  0
    1.3980    2.3935    0.0000 O   0  0  0  0  0  0  0  0  0  0  0  0
    1.3734    0.3481    0.0000 O   0  5  0  0  0  0  0  0  0  0  0  0
    0.6246    2.9379    0.0000 H   0  0  0  0  0  0  0  0  0  0  0  0
   -0.5500   -0.1561    0.0000 H   0  0  0  0  0  0  0  0  0  0  0  0
   -0.0286    3.5050    0.0000 Cl  0  0  0  0  0  0  0  0  0  0  0  0
   -0.0286   -0.6202    0.0000 N   0  0  0  0  0  0  0  0  0  0  0  0
   -0.7426   -1.0328    0.0000 C   0  0  0  0  0  0  0  0  0  0  0  0
   -0.7426   -1.8578    0.0000 C   0  0  0  0  0  0  0  0  0  0  0  0
   -0.0280   -2.2703    0.0000 C   0  0  0  0  0  0  0  0  0  0  0  0
    0.6865   -1.8578    0.0000 C   0  0  0  0  0  0  0  0  0  0  0  0
    0.6865   -1.0328    0.0000 C   0  0  0  0  0  0  0  0  0  0  0  0
   -2.9673    1.7118    0.0000 C   0  0  0  0  0  0  0  0  0  0  0  0
   -2.9673    0.8867    0.0000 C   0  0  0  0  0  0  0  0  0  0  0  0
    2.9673    1.7977    0.0000 C   0  0  0  0  0  0  0  0  0  0  0  0
    2.9673    0.9726    0.0000 C   0  0  0  0  0  0  0  0  0  0  0  0
   -0.0280   -3.0953    0.0000 O   0  0  0  0  0  0  0  0  0  0  0  0
    0.6816   -3.5050    0.0000 C   0  0  0  0  0  0  0  0  0  0  0  0
  6 23  1  0      
  7 24  1  0      
  8 25  1  0      
  9 26  1  0      
 27 28  1  0      
 20 27  1  0      
  1  2  1  6      
  1  3  1  1      
  1  4  1  6      
  1  5  1  1      
  2  6  2  0      
  3  7  2  0      
  6  7  1  0      
  4  8  2  0      
  5  9  2  0      
  9  8  1  0      
  3 10  1  0      
  2 11  1  0      
  4 12  1  0      
  5 13  1  0      
 12 14  1  0      
 10 15  1  0      
 16  1  1  0      
 17 18  2  0      
 18 19  1  0      
 19 20  2  0      
 20 21  1  0      
 21 22  2  0      
 22 17  1  0      
 17  1  1  0      
M  CHG  3   1   2  11  -1  13  -1
M  STY  1   1 SUP
M  SLB  1   1   1
M  SAL   1  1  23
M  SBL   1  1   1
M  SMT   1 M^e
M  SBV   1   1    0.7969   -0.2136
M  STY  1   2 SUP
M  SLB  1   2   2
M  SAL   2  1  24
M  SBL   2  1   2
M  SMT   2 M^e
M  SBV   2   2    0.7969    0.2136
M  STY  1   3 SUP
M  SLB  1   3   3
M  SAL   3  1  25
M  SBL   3  1   3
M  SMT   3 Me
M  SBV   3   3   -0.7969   -0.2136
M  STY  1   4 SUP
M  SLB  1   4   4
M  SAL   4  1  26
M  SBL   4  1   4
M  SMT   4 Me
M  SBV   4   4   -0.7969    0.2136
M  STY  1   5 SUP
M  SLB  1   5   5
M  SAL   5  2  27  28
M  SBL   5  1   6
M  SMT   5 OMe
M  SBV   5   6    0.0000    0.8250
M  END
